# Supplementary material for: Waterhole detection using a vegetation index in desert bighorn sheep (Ovis canadensis cremnobates) habitat
Source: PLoS One. 2019 Jan 22;14(1):e0211202. doi: 10.1371/journal.pone.0211202 (PMC6342311; doi:10.1371/journal.pone.0211202)
Supplement: S1 Spreadsheet — (XLSX) [file pone.0211202.s001.xlsx]

## Sheet: wet
OBJECTID	pointid	Grande_lluvias	Matomi_lluvias	Zamora_lluvias	Hemes_lluvias	Blancas_lluvias	canelo_lluvias	cordero_lluvias	Azul_lluvias	volcan_lluvias	miramar_lluvias	Palmito_lluvias	San Agustin_lluvias	Peralta_luvias	Agua dulce
1	1	0.246468	0.170704	0.103633	0.0555826	0.0838405	0.0655271	0.0567164	0.0552147	0.106599	0.0297694	0.0467818	0.0600572	0.0692666	0.106552
2	2	0.13992	0.157638	0.107237	0.0633226	0.0851562	0.0639685	0.0843373	0.133812	0.115842	0.0285714	0.0357143	0.0575981	0.108934	0.0942201
3	3	0.110805	0.138334	0.110996	0.0655477	0.0815085	0.0729688	-0.026648	0.162575	0.123022	0.00773693	0.0311216	0.0592186	0.0754386	0.110046
4	4	0.153772	0.176337	0.135922	0.0589406	0.0789256	0.0614841	-0.113712	0.20093	0.145081	-0.0550285	0.0217323	0.0533076	0.0778375	0.104827
5	5	0.15482	0.19459	0.101578	0.0535847	0.0951314	0.0599197	-0.0378214	0.132375	0.106429	0.028609	0.0297843	0.0430248	0.0701704	0.105021
6	6	0.193465	0.20456	0.134694	0.0548283	0.088695	0.0583874	-0.0779014	0.127875	0.0887012	0.0404881	0.00544348	0.0498199	0.0617687	0.101542
7	7	0.245581	0.185185	0.0761084	0.0537866	0.0937821	0.0670709	-0.12605	0.11217	0.100927	0.054039	0.0405533	0.0477942	0.0660011	0.0907998
8	8	0.251888	0.168421	0.0600318	0.0585793	0.0859328	0.0631419	-0.122642	0.0976167	0.131522	0.0536716	0.0452703	0.063901	0.0586561	0.101301
9	9	0.2198	0.17852	0.0896133	0.0580509	0.0953757	0.121316	0.0542942	0.119024	0.184327	0.0704367	0.0394121	0.0460224	0.0713691	0.124684
10	10	0.175982	0.204958	0.0895358	0.0598911	0.0794035	0.0960948	0.126266	0.0848798	0.151042	0.0592225	0.0478804	0.0694037	0.0697274	0.10924
11	11	0.155256	0.179091	0.0715616	0.0512054	0.0887207	0.0765316	0.112867	0.0689655	0.146302	0.0578964	0.0539319	0.0589768	0.0981595	0.101008
12	12	0.2002	0.178659	0.11549	0.0617615	0.0713057	0.0701148	0.134995	0.143246	0.11273	0.0393651	0.0583704	0.0626921	0.0667037	0.0897274
13	13	0.174769	0.17658	0.124098	0.0410436	0.0775665	0.0629445	0.0048077	0.110735	0.113307	0.0674337	0.0400782	0.0701315	0.0595106	0.0887681
14	14	0.201822	0.142691	0.138061	0.0622757	0.0843324	0.064863	0.0893424	0.151515	0.158389	0.0477827	0.0203562	0.0584615	0.0566676	0.0988877
15	15	0.241353	0.176885	0.0965123	0.070965	0.0910534	0.0793872	-0.0813253	0.110384	0.142306	0.0316239	0.0294199	0.0600619	0.0511811	0.100435
16	16	0.185262	0.201231	0.161969	0.0708878	0.096	0.0786066	-0.0554723	0.103728	0.127067	0.0153621	0.0353367	0.0458716	0.0384297	0.0957381
17	17	0.16991	0.182034	0.138771	0.0409511	0.0940171	0.0601073	0.0871906	0.134697	0.111533	0.0296862	0.0294302	0.0531646	0.0625718	0.10037
18	18	0.0861354	0.194021	0.0947844	0.0537105	0.0964567	0.0608209	0.129549	0.0983199	0.129677	-0.0361174	0.0377416	0.0540889	0.0697143	0.101922
19	19	0.123197	0.200855	0.0866605	0.063932	0.0938446	0.0653717	0.0901349	0.149308	0.163208	0.0473257	0.029842	0.0601929	0.0625877	0.103517
20	20	0.14919	0.203801	0.112723	0.0349288	0.089633	0.0625117	0.00881056	0.150773	0.131465	0.0496944	0.0350453	0.0589005	0.0505376	0.0965342
21	21	0.147503	0.184975	0.0815531	0.0530401	0.0804781	0.0686661	-0.122449	0.0899601	0.140932	0.0708035	0.0404696	0.0561056	0.0606847	0.105585
22	22	0.199324	0.184818	0.0548919	0.055426	0.0861756	0.0821946	-0.0628931	0.0936352	0.139381	0.0592744	0.0153121	0.0667535	0.0489439	0.103627
23	23	0.231446	0.199156	0.14636	0.0494458	0.0930088	0.0860739	-0.0574018	0.112587	0.15546	0.0800215	0.0393325	0.0843841	0.0421456	0.0969859
24	24	0.221493	0.189458	0.0503929	0.0640517	0.0955749	0.0891537	-0.0379009	0.119091	0.16696	0.0589001	0.0477411	0.0597898	0.0536014	0.0920008
25	25	0.199606	0.183662	0.0861946	0.0475664	0.0839408	0.213511	-0.0917874	0.0955859	0.118592	0.0256776	0.0512113	0.0665809	0.0501275	0.116172
26	26	0.217678	0.169164	0.0641248	0.0715695	0.0909091	0.168043	-0.101574	0.0894472	0.0640177	0.0488295	0.03663	0.0691358	0.0541034	0.119641
27	27	0.143303	0.169811	0.105696	0.0348488	0.0952194	0.163743	-0.00500502	0.13296	0.0985916	0.068025	0.0561134	0.0614767	0.057485	0.0969824
28	28	0.167545	0.181385	0.063326	0.0762464	0.0812154	0.134692	0.0384906	0.0949721	0.175729	0.0845921	0.0459702	0.0603641	0.069237	0.0841584
29	29	0.175197	0.18938	0.0702702	0.0442739	0.089843	0.107529	0.0905861	0.0475214	0.162348	0.102599	0.060472	0.060858	0.0643602	0.0952381
30	30	0.239515	0.167879	0.126056	0.0652884	0.066788	0.0927923	0.0925156	0.161758	0.177605	0.0258449	0.0338563	0.0724269	0.0421377	0.0784757
31	31	0.182266	0.179712	0.105052	0.067715	0.0700353	0.0707811	0.0833333	0.0998415	0.11324	-0.0736698	0.0391276	0.08774	0.0660271	0.0863989
32	32	0.226203	0.216084	0.10802	0.0557329	0.0794776	0.0604296	0.102231	0.128539	0.0800305	-0.0189135	0.0542518	0.0638298	0.0586552	0.0961757
33	33	0.181531	0.193335	0.100213	0.0801856	0.094758	0.0697755	0.105861	0.109369	0.103605	0.069853	0.0289116	0.0712269	0.0565302	0.112328
34	34	0.194725	0.185275	0.120286	0.0747056	0.0943705	0.0707935	0.104732	0.138118	0.136296	0.0930329	0.0364766	0.063299	0.0537179	0.109229
35	35	0.227524	0.171711	0.0970193	0.0515713	0.0843571	0.0703817	0.0768073	0.134727	0.155855	0.128102	0.0508125	0.0724638	0.0548303	0.0981132
36	36	0.145478	0.164549	0.102066	0.0842014	0.0799683	0.0665923	-0.0132916	0.14	0.14433	0.0673953	0.0559067	0.0597844	0.0538024	0.0943396
37	37	0.158235	0.20412	0.0630605	0.0641461	0.0922524	0.0649926	0.0614173	0.12994	0.100726	0.00345543	0.0450067	0.0494858	0.0643402	0.0905738
38	38	0.124687	0.194444	0.129027	0.0361074	0.0793013	0.0596271	0.0892508	0.117024	0.0728242	0.00450743	0.0352802	0.0607995	0.0693125	0.085548
39	39	0.100958	0.193765	0.0823832	0.0396262	0.0940413	0.0629449	0.101955	0.144582	0.135281	0.00156591	0.0740212	0.0627085	0.0685762	0.0890213
40	40	0.137085	0.178195	0.102645	0.0625105	0.0838709	0.0689788	0.110873	0.127796	0.151431	0.0680443	0.0548913	0.0612245	0.0550978	0.0979689
41	41	0.155977	0.179699	0.0952472	0.0351201	0.0935252	0.0760165	0.0904646	0.111785	0.0970149	0.0455243	0.0306178	0.0732636	0.0662725	0.103994
42	42	0.185889	0.199641	0.0836278	0.0630572	0.0896414	0.0772	-0.117735	0.0981868	0.130561	0.061359	0.046376	0.0622127	0.0485346	0.108962
43	43	0.204327	0.193756	0.0826211	0.0520499	0.0866142	0.0761003	0.00283286	0.08166	0.0954955	0.0549793	0.0356058	0.0737251	0.058296	0.0988126
44	44	0.189151	0.190226	0.0564566	0.0530349	0.0859766	0.102503	0.0596027	0.086523	0.100652	0.0618673	0.0239815	0.0978975	0.0610022	0.105305
45	45	0.197975	0.204269	0.0720263	0.065512	0.0972105	0.143195	0.0790021	0.114583	0.132884	0.0695389	0.0318547	0.08352	0.0779473	0.0842279
46	46	0.187382	0.199653	0.104008	0.0393431	0.0865303	0.153993	-0.0113636	0.124699	0.139062	0.0339956	0.051029	0.0678192	0.0654762	0.0967742
47	47	0.134403	0.183928	0.0302834	0.0853778	0.0884787	0.215992	-0.0666667	0.127956	0.0911111	0.0412603	0.0227405	0.085205	0.0660633	0.104283
48	48	0.161468	0.1887	0.0946138	0.0599103	0.0817963	0.265516	0.0428572	0.122618	0.0883814	0.0368584	0.0573486	0.0845461	0.0910747	0.089663
49	49	0.175057	0.176309	0.0652326	0.0679612	0.0844512	0.219672	0.0172413	0.158562	0.182295	0.0514821	0.0600311	0.0716612	0.0961332	0.0805474
50	50	0.155621	0.192942	0.0818352	0.0428535	0.0850865	0.160221	0.0561056	0.0954879	0.158491	0.111674	0.0925325	0.0701038	0.0548604	0.0703781
51	51	0.187817	0.17416	0.0744758	0.0651118	0.078957	0.168036	0.0631111	0.0655462	0.180812	0.12086	-0.00967866	0.0664137	0.054741	0.0860491
52	52	0.1895	0.180638	0.0946964	0.0706076	0.0900055	0.162802	0.154545	0.134615	0.164849	0.118644	0.0553936	0.0619946	0.059754	0.0908108
53	53	0.252313	0.182828	0.127304	0.0577315	0.0928677	0.141064	0.145833	0.118032	0.131248	0.041589	0.0081967	0.069468	0.0373289	0.0865955
54	54	0.289575	0.195883	0.107094	0.0668161	0.0932219	0.111311	0.110355	0.102334	0.100143	-0.0358566	0.0214859	0.0680037	0.050025	0.106217
55	55	0.173021	0.198534	0.109829	0.0707925	0.0835313	0.0902465	0.13154	0.0889328	0.136704	-0.120548	0.0373326	0.0666667	0.0556295	0.112595
56	56	0.139927	0.203302	0.112444	0.0689889	0.0842125	0.0735518	0.0834937	0.131793	0.132348	0.0145812	0.0475156	0.0710988	0.0539509	0.0911602
57	57	0.143944	0.180241	0.105132	0.0577398	0.0961161	0.0642361	0.0736933	0.112667	0.112156	0.0608505	0.0765828	0.0705297	0.0605368	0.0930233
58	58	0.150434	0.169325	0.0788782	0.0737774	0.0885437	0.072957	0.092111	0.125759	0.11975	0.0653931	0.0531216	0.0903307	0.0645919	0.109489
59	59	0.19833	0.172763	0.0799016	0.0615601	0.0902903	0.0695932	0.0861423	0.120267	0.134844	0.0863222	0.0307255	0.0611983	0.0525394	0.107559
60	60	0.248021	0.183057	0.0917484	0.0654681	0.0890647	0.0687385	0.105677	0.114824	0.154267	0.0766283	0.0560889	0.0379085	0.0609081	0.0989673
61	61	0.165336	0.174269	0.147189	0.0865888	0.0784621	0.0545929	0.0681702	0.157509	0.136496	0.042654	0.0432276	0.0489559	0.0456561	0.0989333
62	62	0.141414	0.162948	0.10062	0.0682777	0.100658	0.0580374	0.0749526	0.124599	0.122879	0.0204082	0.0357583	0.0633591	0.0474195	0.0821587
63	63	0.155259	0.163958	0.0955586	0.0432702	0.0857947	0.0571977	0.0628988	0.110257	0.126568	0.00538393	0.0218824	0.0610169	0.0492425	0.081778
64	64	0.157413	0.183746	0.0964582	0.0514771	0.0918855	0.0615621	0.0885029	0.133155	0.108448	0.0637066	0.0668798	0.0755226	0.0638897	0.0912118
65	65	0.176507	0.182456	0.0492611	0.0503472	0.0971872	0.0646106	0.113036	0.134812	0.114187	0.0560794	0.0550815	0.0730118	0.0657682	0.0877878
66	66	0.202916	0.192782	0.0960521	0.0541586	0.0917914	0.0676631	0.0936877	0.136315	0.144072	0.0527373	0.0257926	0.0809134	0.0618182	0.101606
67	67	0.229794	0.181016	0.105599	0.0305344	0.0914941	0.0808166	0.0183908	0.093185	0.141014	0.0600801	0.0460544	0.0804428	0.0483758	0.10545
68	68	0.171146	0.184274	0.0878867	0.0549692	0.0852	0.112088	0.0822999	0.0868102	0.128611	0.0509324	0.0380849	0.0688935	0.0720535	0.0986429
69	69	0.186923	0.197733	0.0665869	0.0557406	0.0910969	0.129663	0.0758123	0.0877537	0.138605	0.0775652	0.0330464	0.0679738	0.0373939	0.100719
70	70	0.170706	0.198945	0.0734358	0.0626831	0.0824188	0.135713	0.0798898	0.101849	0.153244	0.0225753	0.046609	0.0908479	0.0578597	0.0869131
71	71	0.128427	0.208149	0.0513393	0.0268186	0.0902632	0.115152	-0.0153453	0.0945398	0.102657	0.0307456	0.0407215	0.0717737	0.0558375	0.088324
72	72	0.181577	0.182724	0.0792003	0.10158	0.0937235	0.097384	-0.046875	0.12152	0.116065	0.0351648	0.0492059	0.0728863	0.0640638	0.101094
73	73	0.200999	0.171101	0.0758138	0.0676213	0.0853312	0.118577	0.0878244	0.158368	0.0900243	0.0570492	0.0699119	0.0801444	0.0548456	0.106266
74	74	0.154887	0.197973	0.0667185	0.0556889	0.0818812	0.165688	0.0566038	0.183277	0.161656	0.0888632	0.111956	0.0828446	0.0643709	0.0794326
75	75	0.178344	0.174167	0.0781765	0.0420393	0.0883117	0.196433	0.0422222	0.0808824	0.158181	0.10814	0.0602514	0.0838852	0.0640996	0.0810051
76	76	0.150775	0.191219	0.0747569	0.0542946	0.08899	0.161323	0.10718	0.0897719	0.186001	0.111048	0.0239774	0.096407	0.0670367	0.0786941
77	77	0.191545	0.183295	0.0731026	0.0642526	0.077347	0.131852	0.184692	0.141909	0.166564	0.113432	0.0684018	0.0899618	0.0505535	0.089275
78	78	0.17788	0.168729	0.0709108	0.0668999	0.0855965	0.130519	0.112081	0.0959729	0.155685	0.0752039	0.0150309	0.0928328	0.064664	0.0948052
79	79	0.183659	0.174023	0.105609	0.0633938	0.0917728	0.150985	0.0997596	0.104836	0.154809	0.0439561	0.0691788	0.083146	0.0441514	0.0911193
80	80	0.153576	0.173184	0.107155	0.0618919	0.0890898	0.14057	0.113936	0.101661	0.136786	0.0545963	0.0279988	0.0667499	0.0404108	0.0956327
81	81	0.131514	0.171098	0.119369	0.071599	0.0875941	0.120787	0.0751737	0.133269	0.0961214	0.112011	0.0690841	0.0679923	0.0581245	0.0882353
82	82	0.167535	0.169006	0.103559	0.0508475	0.100538	0.101064	0.0865551	0.140501	0.116377	-0.046344	0.0355588	0.0537634	0.0614372	0.0827967
83	83	0.154493	0.159548	0.118377	0.0663323	0.0770393	0.0725589	0.0775741	0.119134	0.104406	-0.0932568	0.0753686	0.0557733	0.0587604	0.0893351
84	84	0.189873	0.158573	0.0935034	0.0743949	0.0940236	0.065202	0.0781771	0.125036	0.136187	0.0255578	0.0914518	0.0778025	0.0601942	0.0743773
85	85	0.194805	0.153005	0.0962155	0.0458284	0.0878209	0.0528138	0.0634006	0.118501	0.115633	0.0393359	0.104651	0.0695971	0.0521789	0.0717938
86	86	0.183295	0.152441	0.113915	0.0618329	0.0837458	0.0703169	0.0876405	0.131579	0.113239	0.0761454	0.0698162	0.0444062	0.0586812	0.101515
87	87	0.153942	0.162817	0.0888666	0.0559223	0.0924438	0.0666912	0.0946983	0.100906	0.139368	0.115969	0.0563416	0.0458654	0.0583013	0.113012
88	88	0.169811	0.161932	0.120341	0.0615212	0.0934354	0.0663845	0.0758998	0.106567	0.163049	0.0723684	0.0612751	0.0672437	0.0629599	0.0972831
89	89	0.141382	0.159177	0.111626	0.0854464	0.0872749	0.0629126	0.0725011	0.140356	0.144072	0.0451467	0.068326	0.0726182	0.0689384	0.0967473
90	90	0.126531	0.193247	0.0899148	0.0725118	0.102947	0.0561244	0.0680017	0.130248	0.120963	0.0110584	0.0647763	0.063786	0.0635538	0.072549
91	91	0.205102	0.187749	0.0967405	0.0520038	0.0852383	0.0609252	0.0832697	0.105068	0.126214	0.0257643	0.0474394	0.061036	0.0731435	0.0830652
92	92	0.25823	0.194989	0.0640446	0.0450941	0.073913	0.060501	0.0691013	0.189342	0.139812	0.0628429	0.059116	0.0727811	0.057832	0.0816697
93	93	0.23185	0.184649	0.104895	0.0379189	0.0893532	0.069303	0.0915154	0.147281	0.174038	0.0577201	0.046887	0.0624823	0.0510464	0.0825863
94	94	0.253685	0.178421	0.104063	0.043659	0.0875	0.0814846	0.104862	0.120887	0.15964	0.0687362	0.0489011	0.061554	0.0577168	0.100423
95	95	0.238069	0.192435	0.0925582	0.0149639	0.0782009	0.0959649	0.0618087	0.182197	0.0980721	0.0433452	0.0620842	0.0581897	0.0516388	0.10115
96	96	0.194261	0.181845	0.0735544	0.0517242	0.0884462	0.0934639	0.0978593	0.152486	0.135698	0.0611933	0.0450644	0.0674967	0.0510753	0.100535
97	97	0.184779	0.172555	0.0805659	0.038961	0.0797375	0.114548	0.0848183	0.0853739	0.169345	0.0605314	0.0358441	0.0648342	0.0426872	0.0959565
98	98	0.136769	0.189417	0.0796359	0.0498118	0.0797087	0.131732	0.124585	0.0894418	0.1473	0.0272873	0.0694047	0.0671485	0.048442	0.0845155
99	99	0.174584	0.174226	0.0769673	0.0333131	0.0737756	0.115723	0.0893204	0.0948363	0.0883095	0.0638135	0.0447434	0.0617656	0.0385802	0.0941023
100	100	0.214016	0.175028	0.0559558	0.0765855	0.0923206	0.0944612	0.082991	0.0844892	0.0995002	0.0586319	0.0416901	0.0736648	0.053555	0.10583
101	101	0.17844	0.219643	0.0780734	0.0673242	0.0864248	0.103067	0.0973085	0.113337	0.105797	0.0964723	0.0540705	0.0433622	0.0779398	0.0951489
102	102	0.180992	0.189944	0.0547631	0.0579972	0.0961611	0.0930071	0.1184	0.206025	0.140724	0.0645349	0.107669	0.0628159	0.0725	0.0775988
103	103	0.185081	0.208706	0.0664871	0.0475796	0.0948746	0.119348	0.0942663	0.187661	0.144658	0.136119	0.00361272	0.0659378	0.0617496	0.0798268
104	104	0.228677	0.207419	0.0790156	0.0635263	0.0947183	0.149246	0.116959	0.0978261	0.168915	0.120743	0.047073	0.0683274	0.0538382	0.0820224
105	105	0.198792	0.188965	0.0701183	0.0632403	0.0916017	0.129857	0.156673	0.0748079	0.139069	0.115503	0.0506767	0.0796971	0.0518779	0.0869653
106	106	0.120117	0.184014	0.0826877	0.0575221	0.0986121	0.121078	0.133333	0.143573	0.1552	0.0830878	0.0440515	0.0741924	0.0607096	0.0969399
107	107	0.216686	0.176642	0.0782962	0.0555555	0.0911111	0.135757	0.0947369	0.119792	0.128221	0.084273	0.0366197	0.089838	0.0456757	0.102041
108	108	0.159943	0.174389	0.0914525	0.06059	0.091215	0.159155	0.0995226	0.111586	0.158992	0.226901	0.033189	0.079829	0.0540031	0.0961625
109	109	0.14124	0.158674	0.128847	0.0663632	0.0917098	0.131163	0.089172	0.120167	0.124954	0.0539806	0.059628	0.0813036	0.0494268	0.0855876
110	110	0.157591	0.164891	0.103038	0.0441233	0.0947409	0.112695	0.0914845	0.125538	0.082576	0.0498221	0.030756	0.070615	0.0519556	0.0872943
111	111	0.18819	0.177201	0.107308	0.0671468	0.088172	0.102345	0.0877682	0.121835	0.102163	0.0964975	0.0390747	0.0791885	0.0481456	0.0866511
112	112	0.148383	0.160835	0.0950907	0.0618029	0.0826222	0.077166	0.0878062	0.12647	0.0870662	-0.0213816	0.0898813	0.0629012	0.0582279	0.0949244
113	113	0.156598	0.166712	0.0865315	0.0630332	0.086785	0.0645393	0.0875601	0.167698	0.0818678	-0.100196	0.0838889	0.0637626	0.067027	0.0865336
114	114	0.171419	0.172046	0.0805397	0.06	0.0852415	0.0579946	0.0198618	0.156307	0.0941286	-0.0059406	0.0916377	0.0667544	0.0554675	0.0924045
115	115	0.163105	0.156593	0.0953562	0.0635324	0.0975083	0.0712939	0.0333333	0.162104	0.112846	-0.0544164	0.082564	0.0668476	0.0612777	0.0789434
116	116	0.216703	0.149111	0.117721	0.0500363	0.0854785	0.0720483	0.0741313	0.147609	0.137596	0.0545124	0.073423	0.0580046	0.0461049	0.0793289
117	117	0.275656	0.17907	0.118561	0.0603324	0.0868866	0.0740812	0.0812616	0.143511	0.129723	0.107201	0.0709575	0.0469716	0.0503439	0.0713134
118	118	0.275501	0.187615	0.10142	0.0488611	0.0829346	0.0624882	0.134601	0.155287	0.135637	0.053513	0.0732223	0.0610953	0.0455581	0.0999529
119	119	0.148477	0.171049	0.0990132	0.0651878	0.0936777	0.0554208	0.122435	0.105017	0.122879	0.0292634	0.0568475	0.0649266	0.04973	0.102003
120	120	0.18536	0.205471	0.0847343	0.09256	0.0818771	0.0587793	0.134608	0.0730404	0.133833	0.0243619	0.0676341	0.0608868	0.0551976	0.0981309
121	121	0.188599	0.198083	0.088032	0.0653665	0.0900253	0.0698128	0.124393	0.0888186	0.128702	-0.0429655	0.0381635	0.0682705	0.0439105	0.0700096
122	122	0.203545	0.205111	0.1047	0.0404542	0.0859676	0.0832822	0.0715396	0.207404	0.148602	0.0398929	0.0745033	0.0701863	0.0652548	0.0884956
123	123	0.26664	0.21095	0.082371	0.0374441	0.0904088	0.0851286	0.0627202	0.213636	0.117054	0.0408315	0.0494081	0.0684098	0.0504695	0.0785938
124	124	0.205943	0.198657	0.105605	0.0283239	0.0824804	0.0988689	0.0581081	0.125302	0.0955586	0.0635781	0.0576087	0.0730897	0.049668	0.0835395
125	125	0.211367	0.178433	0.0918448	0.045313	0.0848473	0.114362	0.10761	0.0899183	0.0887574	0.0468278	0.0753904	0.0648095	0.0636762	0.0964144
126	126	0.278864	0.169725	0.112488	0.0240821	0.0891489	0.132563	0.0831858	0.107156	0.159273	0.0895191	0.0361076	0.072685	0.0509958	0.0977057
127	127	0.277497	0.17384	0.0754132	0.0280899	0.0987854	0.139657	0.0819924	0.114549	0.16146	0.0536913	0.0386657	0.0670462	0.0522686	0.102508
128	128	0.276133	0.179832	0.0766265	0.0284109	0.0892133	0.123053	0.0929626	0.111796	0.124867	0.0423509	0.0606061	0.0508474	0.0518311	0.09271
129	129	0.22346	0.212351	0.0764644	0.0396733	0.0892781	0.101277	0.0535791	0.147166	0.110326	0.0530494	0.0586292	0.0621302	0.0513667	0.0827128
130	130	0.186268	0.193539	0.0761892	0.0459956	0.0913684	0.0975448	0.100859	0.0719465	0.128155	0.0622406	0.0788643	0.0635631	0.0325648	0.0969856
131	131	0.205943	0.168328	0.0892506	0.0637037	0.0919079	0.0963134	0.115653	0.169112	0.146824	0.155797	0.0660131	0.0624465	0.0475788	0.0882811
132	132	0.220578	0.177229	0.0656696	0.0581215	0.077707	0.114449	0.0905191	0.179523	0.110591	0.0886657	0.0760909	0.0557512	0.062864	0.108928
133	133	0.196954	0.223347	0.0777793	0.0674389	0.0802457	0.0880403	0.0959507	0.234677	0.129968	0.127004	0.0255293	0.05831	0.0933399	0.0872895
134	134	0.191114	0.179704	0.0731334	0.0648092	0.0959925	0.0815819	0.0482204	0.197337	0.144516	0.109055	0.0495696	0.0603015	0.0548673	0.0838105
135	135	0.163242	0.191825	0.0854324	0.0492067	0.0915908	0.103992	0.118223	0.147444	0.135995	0.0991502	0.0586789	0.0625391	0.0447692	0.0911983
136	136	0.141255	0.184846	0.0641764	0.0572417	0.0842572	0.140653	0.131741	0.0726644	0.174264	0.0862974	0.0548349	0.0593729	0.034567	0.0736966
137	137	0.118678	0.190209	0.070067	0.0408384	0.0891308	0.161225	0.106667	0.120168	0.13076	0.0576636	0.0402844	0.0769762	0.0462837	0.0917667
138	138	0.125283	0.181445	0.073442	0.0543575	0.0949203	0.124228	0.102658	0.124952	0.141849	0.0506556	0.0366718	0.0678445	0.0604192	0.106273
139	139	0.22632	0.175306	0.0903303	0.057423	0.0846943	0.150226	0.0737823	0.109649	0.11598	0.146005	0.0420066	0.0907158	0.0541556	0.0826798
140	140	0.161117	0.170118	0.0870395	0.0824588	0.0933735	0.170378	0.0876762	0.129722	0.115861	0.141351	0.0678168	0.0917304	0.07344	0.0864143
141	141	0.155004	0.159412	0.108692	0.0517483	0.0968839	0.138296	0.0973607	0.17655	0.110844	0.0879849	0.0948121	0.0858169	0.0445964	0.0895069
142	142	0.172898	0.159756	0.113475	0.0759582	0.0851675	0.105507	0.107268	0.149936	0.0869708	0.0606654	0.0536467	0.0822631	0.0579752	0.0797459
143	143	0.177728	0.15964	0.0970313	0.0504784	0.0881256	0.0977316	0.10168	0.193748	0.0950846	-0.0296651	0.0624806	0.0944176	0.0534699	0.0749141
144	144	0.17993	0.170407	0.086758	0.0620924	0.0796945	0.089546	0.0763828	0.219048	0.113996	-0.0778443	0.0946152	0.067427	0.0528398	0.105175
145	145	0.165851	0.16978	0.104885	0.0666366	0.0824249	0.0632576	0.0934579	0.185288	0.0866035	-0.0419385	0.112329	0.0667575	0.0702323	0.095256
146	146	0.180669	0.152797	0.0856188	0.0616822	0.0874641	0.0615975	0.090565	0.149187	0.11272	-0.010274	0.0854092	0.0656063	0.0609375	0.0865224
147	147	0.174273	0.14688	0.0901481	0.0439277	0.0878029	0.0774768	0.135632	0.112725	0.107464	0.0255354	0.0626067	0.0701299	0.0779923	0.0746552
148	148	0.1606	0.174833	0.10648	0.0510778	0.0963784	0.0740594	0.0721328	0.111408	0.10464	0.10703	0.0706638	0.0687442	0.0666667	0.0821918
149	149	0.233476	0.19557	0.085956	0.0615487	0.098836	0.0628549	0.0476191	0.138122	0.113273	0.105314	0.0908578	0.0458015	0.0516112	0.0781639
150	150	0.275443	0.206391	0.109456	0.0641621	0.0797422	0.0652382	0.0653144	0.0843205	0.13006	0.0540427	0.0926743	0.0496161	0.061268	0.0693468
151	151	0.226466	0.172096	0.0890501	0.0516941	0.0988524	0.0630073	0.0518688	0.0731079	0.157652	0.0185357	0.13431	0.0479495	0.0463472	0.0904267
152	152	0.164478	0.215078	0.0938622	0.0609629	0.0782609	0.0726059	0.0967283	0.0770642	0.149065	0.0125975	0.122368	0.0591211	0.0384918	0.109662
153	153	0.135117	0.203257	0.0831659	0.0450528	0.0813119	0.0778051	0.0986395	0.0761451	0.178391	-0.0170455	0.0819949	0.0653074	0.0524987	0.0820961
154	154	0.169717	0.194565	0.101843	0.0726817	0.0803093	0.105089	0.0666196	0.0518246	0.175455	0.0346448	0.112346	0.0698873	0.0593111	0.0924017
155	155	0.206505	0.186773	0.0843145	0.0641437	0.0881363	0.118093	0.0744102	0.191714	0.116527	0.0299239	0.0610301	0.0808704	0.0649872	0.0856927
156	156	0.251635	0.208738	0.095229	0.0460587	0.0871136	0.132389	0.0414453	0.195798	0.0840336	0.048996	0.0573043	0.0660651	0.0633641	0.0752286
157	157	0.22902	0.190491	0.10873	0.0396535	0.0890895	0.129385	0.0250467	0.222547	0.117041	0.0433674	0.0436392	0.070052	0.0518678	0.0769814
158	158	0.236069	0.171875	0.122902	0.0426507	0.0773786	0.119785	0.0542148	0.246377	0.0852153	0.0908626	0.0487013	0.0710185	0.0526316	0.0930006
159	159	0.329883	0.178621	0.10044	0.0457365	0.0833334	0.107721	0.106809	0.231239	0.121191	0.0619519	0.0597443	0.0757436	0.0420089	0.0876777
160	160	0.309568	0.166258	0.0857962	0.0309698	0.0897662	0.110187	0.0564137	0.212424	0.153333	0.0573057	0.0320179	0.0691824	0.0354034	0.097977
161	161	0.284362	0.188174	0.0705476	0.0328639	0.0909826	0.0944072	0.0714525	0.165563	0.112644	0.0715431	0.0463189	0.0723799	0.0412853	0.100685
162	162	0.206404	0.213273	0.0700677	0.0298598	0.0877193	0.0966876	0.0687609	0.203379	0.127605	0.05064	0.0632082	0.0723135	0.050681	0.0848903
163	163	0.206263	0.205839	0.0702179	0.0513739	0.0903401	0.105516	0.0542522	0.207109	0.121875	0.0828645	0.0616823	0.064199	0.0454066	0.0876969
164	164	0.22825	0.196371	0.0855348	0.0515395	0.0987868	0.0999533	0.115918	0.176471	0.128822	0.0948687	0.0929965	0.0666277	0.0422485	0.0861538
165	165	0.23373	0.186696	0.0736842	0.0469484	0.0843639	0.095521	0.105345	0.220588	0.102671	0.132434	0.0932625	0.0727273	0.0451226	0.101551
166	166	0.192407	0.188157	0.0642609	0.0484262	0.0860684	0.100633	0.0903614	0.226365	0.124547	0.13611	0.0513575	0.0731425	0.0650023	0.0855127
167	167	0.201241	0.239748	0.0663572	0.0739362	0.101078	0.11132	0.0939597	0.236066	0.132454	0.0978297	0.0358944	0.070507	0.0579601	0.0911119
168	168	0.183888	0.203257	0.079361	0.0683544	0.107352	0.0789886	0.0751945	0.215504	0.139216	0.10315	0.0608914	0.0696576	0.0789653	0.0820842
169	169	0.137769	0.194575	0.0690225	0.0616342	0.100422	0.0752212	0.138249	0.162488	0.149934	0.07494	0.046705	0.0699321	0.0847798	0.0832175
170	170	0.116617	0.171926	0.0780195	0.0544	0.0881182	0.0776113	0.113344	0.13228	0.16999	0.0435297	0.0419059	0.0628173	0.0627824	0.0876211
171	171	0.141463	0.176128	0.0769964	0.0492005	0.0905976	0.115099	0.0932974	0.0597804	0.162201	0.055944	0.0400965	0.0693851	0.0293151	0.100567
172	172	0.193464	0.185405	0.0798842	0.0365156	0.0952024	0.146336	0.071298	0.102057	0.108941	0.0635568	0.0640615	0.0753402	0.0263273	0.0638964
173	173	0.241086	0.172868	0.0896434	0.0407884	0.0903164	0.138679	0.0588928	0.138211	0.0996641	0.0761523	0.0532544	0.0709721	0.044764	0.0809222
174	174	0.224309	0.159692	0.0755986	0.0658807	0.0822128	0.133167	0.0829774	0.135155	0.0982568	0.0388315	0.055154	0.0696762	0.0830266	0.0991211
175	175	0.156723	0.168625	0.0938176	0.0481243	0.0867508	0.14203	0.0776669	0.227036	0.129183	0.0667206	0.0404332	0.0863309	0.072043	0.075754
176	176	0.146286	0.167192	0.104494	0.0911913	0.0803432	0.132112	0.0645734	0.182976	0.047041	0.0706932	0.0298404	0.0693962	0.0786086	0.0763952
177	177	0.179844	0.158163	0.0905344	0.0510551	0.0829511	0.103694	0.0787136	0.227687	0.0734494	-0.00821916	0.045192	0.069134	0.068123	0.0732168
178	178	0.202835	0.164	0.0950472	0.0601529	0.0864813	0.103392	0.0650263	0.106302	0.106259	-0.157895	0.0373307	0.0767642	0.0545785	0.0732779
179	179	0.196747	0.158735	0.0930576	0.0725115	0.0761361	0.116131	0.0881119	0.0610399	0.122071	-0.148825	0.101848	0.0777027	0.0593995	0.09706
180	180	0.19217	0.158439	0.0881667	0.0792641	0.0874613	0.0856048	0.100836	0.0756676	0.103043	-0.0746781	0.121072	0.0651193	0.0468354	0.106549
181	181	0.224372	0.151316	0.0795974	0.0565254	0.0901174	0.079311	0.123004	0.0735751	0.0778919	-0.0449898	0.142981	0.0692939	0.0788308	0.0801977
182	182	0.186972	0.192971	0.105117	0.0523649	0.0807192	0.0855149	0.134481	0.0699775	0.0703248	0.035901	0.117647	0.0713657	0.0818394	0.0929798
183	183	0.133652	0.193234	0.0788447	0.0502697	0.0798104	0.0823624	0.109131	0.0913169	0.0951784	0.0988871	0.0739972	0.0700309	0.0631553	0.0869923
184	184	0.127529	0.201797	0.102444	0.052172	0.0782134	0.0617722	0.153641	0.0825407	0.0867665	0.0847592	0.0644567	0.0630537	0.0728616	0.0857678
185	185	0.204282	0.172662	0.0929368	0.0544401	0.0881411	0.0608121	0.0946463	0.0803949	0.100943	0.0142096	0.105685	0.0493507	0.0451223	0.0874865
186	186	0.219606	0.206319	0.121407	0.0598258	0.0899105	0.0689723	0.0392589	0.0634573	0.125	-0.00226552	0.0764662	0.0555399	0.0459603	0.0750837
187	187	0.205689	0.222993	0.0787492	0.0658436	0.0912699	0.0667195	0.0427075	0.0616197	0.13832	-0.0223214	0.105745	0.0679432	0.0370712	0.0828025
188	188	0.125424	0.189511	0.127165	0.0467846	0.0748193	0.0728065	0.0682493	0.0548026	0.174681	0.0285958	0.108904	0.0651007	0.0403734	0.0821033
189	189	0.188642	0.18595	0.0748351	0.0382572	0.081393	0.111161	0.0591879	0.0483271	0.139173	0.0260532	0.0692741	0.0658967	0.0397878	0.0862551
190	190	0.222804	0.209898	0.106052	0.0529248	0.0843899	0.146759	0.0330753	0.192348	0.113105	0.0654105	0.122538	0.0707418	0.0495566	0.102878
191	191	0.239233	0.209672	0.121636	0.0357367	0.0880195	0.16247	0.0354013	0.169786	0.0927632	0.0568933	0.1193	0.070612	0.0631991	0.075366
192	192	0.257161	0.197949	0.102378	0.0607187	0.0759103	0.146966	0.0157819	0.201777	0.0700757	0.0424788	0.0531429	0.0484197	0.0638767	0.0841566
193	193	0.249209	0.174506	0.0914915	0.0552793	0.0816768	0.117793	0.00223714	0.22765	0.0815534	0.0747185	0.0497116	0.0598823	0.0682552	0.0782742
194	194	0.313668	0.188222	0.0820911	0.0500618	0.0802831	0.122039	0.0749895	0.273125	0.10234	0.0627615	0.0359397	0.0691275	0.0533485	0.0859027
195	195	0.260083	0.255913	0.0817914	0.0467856	0.080441	0.125797	0.0785268	0.246637	0.141361	0.0606242	0.0355882	0.0626058	0.0579356	0.0844143
196	196	0.241069	0.33034	0.0829133	0.0355571	0.0790679	0.100668	0.0667139	0.217247	0.153968	0.0627816	0.0444785	0.0633721	0.0560748	0.0939749
197	197	0.252846	0.215773	0.0767315	0.040856	0.0781499	0.123317	0.088017	0.219668	0.121314	0.0518793	0.0715005	0.0848149	0.0702159	0.0973303
198	198	0.204185	0.201727	0.0766764	0.0259819	0.0671686	0.16828	0.0962744	0.279292	0.135159	0.107692	0.0738221	0.0934176	0.0714286	0.0851282
199	199	0.253615	0.200497	0.0756302	0.047352	0.0931823	0.0989957	0.0902177	0.25364	0.112743	0.0942318	0.0792372	0.0787845	0.0723816	0.0834392
200	200	0.204561	0.210412	0.0886767	0.0333333	0.102554	0.124209	0.130794	0.198381	0.119637	0.154572	0.0733	0.0788804	0.0608492	0.0965922
201	201	0.192025	0.200117	0.0708743	0.0425777	0.0903868	0.0680243	0.100912	0.201337	0.108986	0.162746	0.0525649	0.0908053	0.0649834	0.0881161
202	202	0.194159	0.180612	0.0840458	0.0480215	0.113027	0.0823793	0.102941	0.218694	0.113924	0.103256	0.0472368	0.0945674	0.0551905	0.0825327
203	203	0.214932	0.238472	0.0714101	0.0507297	0.11344	0.083428	0.114342	0.199405	0.113273	0.100644	0.0480118	0.0754661	0.0838247	0.0965745
204	204	0.201306	0.206986	0.0854952	0.0588235	0.0910296	0.0925926	0.0966332	0.184044	0.175821	0.073601	0.062422	0.0869055	0.0486783	0.0821238
205	205	0.121612	0.19276	0.0647572	0.0631907	0.105052	0.0905028	0.112909	0.172257	0.162578	0.0489722	0.0412621	0.0897814	0.0560413	0.0868606
206	206	0.154935	0.181047	0.0876895	0.0784876	0.0914561	0.077672	0.0608639	0.21719	0.153498	0.059587	0.0345032	0.0771136	0.0632197	0.0681384
207	207	0.218715	0.182828	0.077975	0.0763745	0.0964808	0.0700022	0.0910653	0.158395	0.12864	0.0613083	0.051553	0.066834	0.0797528	0.101867
208	208	0.19095	0.179982	0.0809426	0.0194099	0.0949679	0.0862262	0.0769674	0.0465707	0.0993976	0.0628476	0.0603985	0.0693375	0.0591472	0.0870062
209	209	0.190069	0.167092	0.101152	0.0271514	0.082986	0.097658	0.0648444	0.112671	0.125238	0.0974843	0.0569315	0.0725953	0.0482652	0.0758173
210	210	0.215005	0.194137	0.0827509	0.0659426	0.0915794	0.106227	0.0806788	0.137634	0.120225	0.0944136	0.0870238	0.0626299	0.055189	0.0926805
211	211	0.203651	0.166322	0.0950134	0.077366	0.0946342	0.124581	0.0650285	0.17305	0.12625	0.0125926	0.0841769	0.0755362	0.0681671	0.0754897
212	212	0.159336	0.171843	0.0874829	0.0637853	0.0859694	0.147525	0.0511683	0.243928	0.122719	0.0559441	0.0821406	0.0735146	0.0549932	0.0778918
213	213	0.140749	0.176023	0.0690071	0.0573744	0.0827237	0.156291	0.0797774	0.156777	0.0266212	-0.0672269	0.0965997	0.0744891	0.0676407	0.0728538
214	214	0.187014	0.169022	0.111574	0.0630027	0.084032	0.135312	0.0833333	0.0394682	0.0283048	-0.0976331	0.0839866	0.0750988	0.0710441	0.0705744
215	215	0.204461	0.179769	0.0876242	0.0749465	0.0816564	0.128905	0.0900604	0.101681	0.0599478	-0.166667	0.0542683	0.081692	0.0517756	0.0793651
216	216	0.215593	0.186011	0.0906869	0.0481795	0.0833165	0.145719	0.0992459	0.052973	0.0795907	-0.129173	0.0933817	0.076529	0.0692111	0.0875136
217	217	0.22797	0.187915	0.071945	0.0793128	0.0872713	0.119948	0.132834	0.0192005	0.0716917	-0.0774193	0.072095	0.068376	0.0607505	0.0910956
218	218	0.208384	0.207084	0.113632	0.0819809	0.0876228	0.0982751	0.0965284	0.0276432	0.0724823	-0.00271887	0.0761773	0.0740416	0.0651921	0.0918897
219	219	0.202918	0.200131	0.0927222	0.0531549	0.0823029	0.110578	0.141649	0.0410648	0.0697389	0.0464011	0.0994413	0.0714471	0.0641093	0.0918593
220	220	0.188112	0.186216	0.084229	0.0486627	0.0772541	0.0840932	0.132637	0.0512535	0.0721836	0.0801034	0.101725	0.0648148	0.0483791	0.0894597
221	221	0.134222	0.172765	0.0838143	0.0418486	0.0902241	0.0584043	0.116316	0.0639125	0.0913333	0.0938665	0.15986	0.0624113	0.0888662	0.0879785
222	222	0.137094	0.212753	0.106781	0.0576037	0.0930825	0.0616207	0.175425	0.0947185	0.102522	0.0096077	0.100461	0.0555699	0.0473707	0.0849863
223	223	0.181818	0.206112	0.0794392	0.04769	0.0828307	0.0734372	0.180818	0.144447	0.122119	0.0355056	0.0787569	0.0518518	0.0429695	0.0838314
224	224	0.171952	0.182079	0.121827	0.0623952	0.0848267	0.071646	0.105447	0.126326	0.130702	0.00365152	0.0901397	0.0534202	0.0286453	0.0796136
225	225	0.125944	0.204699	0.0721358	0.0681177	0.0838161	0.0759309	0.0644584	0.0665013	0.119552	0.0284797	0.088499	0.0565111	0.0391892	0.0791757
226	226	0.183673	0.191563	0.113501	0.0610897	0.0870241	0.131579	0.046549	0.0498458	0.108812	0.012318	0.0740192	0.0480641	0.051832	0.0905067
227	227	0.261856	0.193162	0.135735	0.0536955	0.0801704	0.178973	0.05827	0.133563	0.0981488	0.0597243	0.120813	0.055055	0.0508806	0.090317
228	228	0.258931	0.190019	0.0933219	0.044095	0.0891051	0.183652	0.0602151	0.162957	0.0966709	0.0398724	0.120577	0.0575809	0.065182	0.0803293
229	229	0.26562	0.160892	0.103823	0.0420933	0.0882179	0.157058	0.0122325	0.237565	0.10535	0.0629371	0.0623656	0.057519	0.0504134	0.0790309
230	230	0.205941	0.210482	0.0923782	0.0490141	0.0812336	0.133394	0.00730554	0.247048	0.135425	0.071152	0.0718916	0.0595441	0.0687185	0.0818247
231	231	0.329605	0.27725	0.0949514	0.0628408	0.0736332	0.123624	0.0308672	0.24113	0.16117	0.0701571	0.0687374	0.0625218	0.0507042	0.0734949
232	232	0.297724	0.345302	0.0872753	0.0582353	0.0694642	0.124699	0.0820643	0.288728	0.130931	0.0665182	0.0667461	0.0681511	0.064905	0.0834806
233	233	0.268293	0.294342	0.0885049	0.0542918	0.069777	0.124287	0.0744153	0.236554	0.114951	0.0606557	0.0654995	0.0576606	0.0532778	0.0820073
234	234	0.357026	0.21508	0.0801097	0.049599	0.0821316	0.156863	0.0917711	0.215306	0.0959912	0.0566229	0.111742	0.0702549	0.0465288	0.0876684
235	235	0.23848	0.211587	0.0713238	0.0514184	0.0817041	0.174652	0.0882658	0.267485	0.115201	0.0788676	0.0904093	0.0839872	0.0452358	0.0874574
236	236	0.261481	0.201701	0.0771302	0.0437978	0.0691167	0.106281	0.0973906	0.264402	0.126062	0.108345	0.119048	0.0913735	0.057734	0.0826689
237	237	0.219262	0.203339	0.0862184	0.0493097	0.0854771	0.145801	0.104917	0.234814	0.118929	0.135464	0.0683192	0.0771812	0.0556675	0.0865975
238	238	0.2182	0.183603	0.0836958	0.0420044	0.0872262	0.111055	0.128177	0.185745	0.105312	0.106042	0.0535332	0.0877591	0.0658486	0.0841356
239	239	0.253521	0.185353	0.0758141	0.0455446	0.0821685	0.0713209	0.105452	0.18683	0.138291	0.0860852	0.0601127	0.0913281	0.0409861	0.0684474
240	240	0.204718	0.175963	0.0817879	0.0531324	0.107393	0.076652	0.109855	0.202241	0.117382	0.0925407	0.0440555	0.0815354	0.072819	0.0934287
241	241	0.208363	0.203841	0.0732601	0.0246479	0.108459	0.0867233	0.114089	0.166667	0.166244	0.0705883	0.0566481	0.0739477	0.0808621	0.0933513
242	242	0.129691	0.219748	0.0824042	0.0553997	0.0790522	0.0822188	0.0463526	0.158582	0.17055	0.0520703	0.0474777	0.0824972	0.0757761	0.0904595
243	243	0.199537	0.1853	0.0721519	0.0423992	0.0990876	0.0852817	0.120824	0.186681	0.20922	0.0544259	0.0362408	0.0921739	0.0579062	0.069303
244	244	0.253812	0.184638	0.0854159	0.0707383	0.100084	0.0768543	0.061849	0.195238	0.144678	0.0665881	0.0346802	0.0866189	0.0373494	0.0846832
245	245	0.192442	0.159202	0.0762701	0.0724637	0.0883337	0.067747	0.0779829	0.122462	0.110081	0.0639913	0.0333645	0.0798294	0.0550946	0.10686
246	246	0.152432	0.169309	0.0900168	0.035122	0.0838405	0.0756302	0.0796561	0.0846245	0.134285	0.0604352	0.051944	0.0737656	0.0554567	0.0876204
247	247	0.1543	0.166903	0.108161	0.045701	0.0960496	0.080756	0.0821114	0.0981132	0.0812345	0.0905105	0.0654465	0.0683378	0.0672669	0.0901737
248	248	0.185892	0.19772	0.0775923	0.057931	0.0865741	0.08629	0.0782454	0.113192	0.116515	0.0557129	0.0525853	0.0632014	0.0661574	0.0765432
249	249	0.207324	0.161476	0.10509	0.0597122	0.0948024	0.131858	0.07184	0.136414	0.099803	0.0790284	0.064229	0.0690779	0.0586754	0.0732759
250	250	0.213247	0.164284	0.0883043	0.059593	0.0794817	0.150196	0.0750942	0.145385	0.0207445	0.0535094	0.0427873	0.0698247	0.0688172	0.0744857
251	251	0.179856	0.171889	0.0956065	0.0541126	0.0849991	0.16147	0.0947182	0.055365	0.0234375	0.105392	0.0582226	0.079824	0.0684549	0.0607946
252	252	0.119707	0.174942	0.118261	0.0491087	0.0767515	0.154624	0.0945384	0.106578	0.0215124	-0.17768	0.0562716	0.0765401	0.0613143	0.0683781
253	253	0.204534	0.165172	0.0696259	0.0588677	0.0753438	0.158952	0.0960952	0.156028	0.0180941	-0.123529	0.093929	0.0847563	0.0709141	0.0729879
254	254	0.197808	0.177581	0.103736	0.0619106	0.07373	0.18002	0.126331	0.0564069	0.0514604	-0.177489	0.0731707	0.0762554	0.057983	0.0926766
255	255	0.210802	0.204466	0.0768671	0.0686956	0.0674627	0.156183	0.124772	0.0560803	0.0496416	-0.13798	0.0748299	0.0684759	0.0637602	0.0982581
256	256	0.259148	0.209061	0.102008	0.0546536	0.0905595	0.134003	0.0863019	0.0630381	0.0652643	-0.135641	0.136397	0.0813776	0.0621343	0.0951374
257	257	0.21125	0.200132	0.0809289	0.0542169	0.0844646	0.134067	0.0836653	0.0759119	0.0830769	0.00521135	0.12626	0.0708485	0.0465306	0.0923539
258	258	0.159346	0.191462	0.111005	0.0439122	0.0820881	0.0982509	0.110551	0.160633	0.0842825	0.0363727	0.118176	0.0634043	0.0630208	0.112798
259	259	0.204164	0.193085	0.11472	0.0468812	0.0863466	0.0718526	0.148576	0.090617	0.105571	0.0188816	0.0932516	0.0652781	0.0629583	0.0789615
260	260	0.165374	0.21067	0.0758592	0.0449587	0.0882353	0.0712262	0.17605	0.0384732	0.152289	0.1008	0.136089	0.0566528	0.0782953	0.082495
261	261	0.148899	0.210918	0.0620529	0.058595	0.0928155	0.0878713	0.239264	0.097281	0.109133	0.0312382	0.138522	0.0547466	0.0808081	0.0818482
262	262	0.155154	0.189845	0.118298	0.0343454	0.086696	0.0824017	0.222121	0.131504	0.100575	0.0332303	0.138015	0.0662842	0.0533262	0.0790514
263	263	0.121788	0.197632	0.0826041	0.0710273	0.0876701	0.11579	0.1669	0.110395	0.0941512	-0.0215827	0.147194	0.0466254	0.0455818	0.0933471
264	264	0.111667	0.204633	0.130926	0.0525108	0.0773106	0.172901	0.109721	0.100168	0.106681	0.0162432	0.124675	0.0406355	0.0312979	0.0701918
265	265	0.138902	0.202103	0.120956	0.0681672	0.0795875	0.176936	0.101852	0.0430787	0.0988353	-0.032301	0.117021	0.0607768	0.0321995	0.0998193
266	266	0.236074	0.221895	0.107311	0.0604733	0.0829916	0.183413	0.0633224	0.171601	0.0706624	0.0260785	0.12657	0.0521444	0.0422326	0.0979449
267	267	0.252116	0.178882	0.103979	0.0633397	0.0808395	0.193355	0.0520094	0.173997	0.157858	0.0391198	0.112112	0.0526667	0.0552319	0.0791367
268	268	0.238943	0.24643	0.105838	0.0611183	0.074426	0.166466	0.0221843	0.2447	0.147796	0.0602043	0.069972	0.042244	0.0395456	0.0762492
269	269	0.18109	0.312296	0.0863836	0.0430024	0.077288	0.143969	0.0313466	0.3075	0.101986	0.0795427	0.0831974	0.0558659	0.0402802	0.0852436
270	270	0.317372	0.320838	0.0720294	0.0600164	0.0653465	0.130214	0.0472637	0.263965	0.0639869	0.0706127	0.0327434	0.0591879	0.0504467	0.0797257
271	271	0.301085	0.273331	0.0710562	0.0702885	0.0797072	0.10816	0.0784723	0.265653	0.0872434	0.0728011	0.105813	0.058246	0.0442389	0.0795078
272	272	0.251499	0.279139	0.100634	0.0616141	0.0871369	0.107255	0.0647532	0.260592	0.10468	0.0625166	0.068012	0.0686384	0.0621359	0.0822209
273	273	0.352676	0.187751	0.0862414	0.0592355	0.0985011	0.124597	0.102771	0.208004	0.110274	0.0638399	0.0531368	0.0603156	0.06201	0.0869043
274	274	0.251625	0.218165	0.0849251	0.0582751	0.0962236	0.117584	0.0858568	0.264356	0.141796	0.106815	0.105708	0.0726023	0.0363151	0.0942275
275	275	0.230138	0.20633	0.0738954	0.0459057	0.102315	0.12927	0.0726464	0.30285	0.119683	0.132824	0.122926	0.0798741	0.0588464	0.090678
276	276	0.252466	0.197384	0.0784482	0.0601351	0.105908	0.094476	0.100162	0.280374	0.13555	0.139409	0.0813517	0.070535	0.0696477	0.0853787
277	277	0.247224	0.223808	0.0855065	0.0546507	0.104043	0.0927305	0.108193	0.295868	0.166974	0.080424	0.0549656	0.060122	0.0730492	0.0819809
278	278	0.28	0.18269	0.078616	0.052348	0.0966573	0.0718137	0.0919652	0.22619	0.121573	0.0826211	0.0530864	0.0760803	0.0646399	0.0588973
279	279	0.216216	0.178899	0.0712576	0.0495513	0.095979	0.0788061	0.0962744	0.142088	0.164654	0.0809281	0.0546529	0.0930016	0.0579166	0.0815337
280	280	0.188125	0.184047	0.0810252	0.0270833	0.0883203	0.0732768	0.117251	0.190687	0.195897	0.0829966	0.0525101	0.0800123	0.0544637	0.0811681
281	281	0.13186	0.19283	0.0855809	0.0499667	0.0796641	0.0956014	0.0986593	0.180236	0.225147	0.0598237	0.0688331	0.0745914	0.0542334	0.0852916
282	282	0.23188	0.195086	0.0981148	0.031619	0.111784	0.0765136	0.121014	0.162823	0.151277	0.0600061	0.0557377	0.0766694	0.0587017	0.0723153
283	283	0.271061	0.181845	0.0799847	0.0500234	0.0810157	0.0917287	0.0703833	0.258459	0.146636	0.0705394	0.0609341	0.0828169	0.0611371	0.087454
284	284	0.166265	0.183841	0.0856499	0.0436781	0.0896414	0.0889042	0.0757664	0.25	0.152529	0.0568054	0.0331839	0.0984545	0.0552296	0.0859605
285	285	0.166266	0.160501	0.0766107	0.0698587	0.0900415	0.0782765	0.0947124	0.224941	0.139241	0.0590883	0.0442837	0.103489	0.0627178	0.0878443
286	286	0.180224	0.169239	0.0858752	0.0553333	0.0861588	0.0749567	0.0788133	0.24236	0.135538	0.0322384	0.0712941	0.0870697	0.0728457	0.0939597
287	287	0.131144	0.170056	0.0776815	0.0490939	0.0920437	0.0744086	0.0713635	0.148225	0.219434	0.129053	0.0586327	0.0776066	0.0733116	0.077222
288	288	0.159968	0.175246	0.0927297	0.0708495	0.08628	0.0786813	0.0827754	0.0417722	0.15841	0.0556104	0.0800093	0.0840956	0.0698447	0.0796079
289	289	0.196571	0.151669	0.102806	0.065257	0.082227	0.106622	0.0608388	0.040502	0.0920971	0.148535	0.0551306	0.0799536	0.0624825	0.078929
290	290	0.176865	0.178391	0.0859579	0.0610157	0.0873488	0.135214	0.0859575	0.0804911	0.0476997	0.140369	0.06287	0.0692284	0.144674	0.0697566
291	291	0.166524	0.181314	0.134938	0.0561883	0.0827533	0.15586	0.0913706	0.114776	0.0316872	0.0957854	0.0536499	0.0833334	0.08723	0.0843097
292	292	0.140759	0.165929	0.0898003	0.0680918	0.0920585	0.144901	0.101866	0.162304	0.0268496	-0.142037	0.105543	0.0828367	0.0702166	0.0626632
293	293	0.22	0.159166	0.105596	0.0538268	0.0939032	0.167277	0.124025	0.131405	0.0168067	-0.118541	-0.0586592	0.0792317	0.0703736	0.064999
294	294	0.171364	0.171745	0.0945466	0.0654206	0.0705345	0.205362	0.0805322	0.113202	0.0260006	-0.183056	0.0603248	0.0696412	0.060357	0.0909091
295	295	0.189274	0.186092	0.0923603	0.0939358	0.0892575	0.178835	0.0761216	0.0732211	0.0189856	-0.130435	0.0769231	0.070396	0.0669195	0.0993576
296	296	0.255063	0.185718	0.106335	0.0812183	0.0889666	0.178866	0.104247	0.0737894	0.0471724	-0.120308	0.11473	0.0578358	0.0678708	0.0910646
297	297	0.210263	0.182923	0.086033	0.062634	0.0883601	0.180628	0.104908	0.169478	0.0895478	0.0182348	0.0947093	0.0645804	0.0563843	0.0980914
298	298	0.157483	0.179941	0.118523	0.0452097	0.0963695	0.123544	0.115984	0.206361	0.0937829	-0.00697673	0.118844	0.0661041	0.0509214	0.112747
299	299	0.219936	0.21809	0.107665	0.0506525	0.0951735	0.0939668	0.18296	0.240899	0.127563	0.047138	0.113749	0.0600402	0.0466321	0.0892621
300	300	0.243902	0.21012	0.0597243	0.0401494	0.0818394	0.090312	0.190184	0.185126	0.162387	0.12277	0.203906	0.0654358	0.0446886	0.0834645
301	301	0.192695	0.232401	0.0717233	0.0547299	0.0853973	0.0873667	0.208649	0.156134	0.0765386	0.0454719	0.122936	0.0566242	0.0492186	0.0843946
302	302	0.171749	0.218397	0.123789	0.0510018	0.0857257	0.107204	0.264859	0.0994277	0.0820727	0.0181818	0.13852	0.056729	0.0476733	0.0894692
303	303	0.0934294	0.210784	0.0946143	0.0589965	0.0807202	0.175814	0.204513	0.0934903	0.0851565	0.0230627	0.157548	0.058191	0.0545266	0.0826503
304	304	0.138142	0.200729	0.136216	0.0516704	0.0848709	0.188454	0.201886	0.141691	0.0861196	0.0155979	0.141927	0.0390721	0.0505366	0.0753385
305	305	0.176993	0.217309	0.109504	0.0690647	0.0831859	0.173063	0.184263	0.11185	0.0925685	0.0162845	0.165547	0.052568	0.0565198	0.0819973
306	306	0.208205	0.234279	0.107388	0.0543584	0.0883055	0.193191	0.209052	0.212738	0.0902326	0.0618306	0.13797	0.0602802	0.0491873	0.0940285
307	307	0.23237	0.197688	0.0884447	0.0655862	0.0817512	0.190977	0.132022	0.17215	0.162411	0.0433616	0.130746	0.0584996	0.0335413	0.0872556
308	308	0.228792	0.224407	0.086252	0.0779023	0.0777262	0.159043	0.03367	0.253503	0.122974	0.0678882	0.119483	0.0532814	0.04	0.0748592
309	309	0.196974	0.318807	0.0827729	0.0529494	0.0831263	0.137421	0.0393443	0.2416	0.0688576	0.0761062	0.152866	0.0551746	0.0524513	0.0817786
310	310	0.266534	0.245677	0.0695652	0.0477984	0.0701403	0.109692	0.0204886	0.219	0.0771617	0.0782655	0.062029	0.0691303	0.0670834	0.0703746
311	311	0.281404	0.210576	0.0881384	0.0556544	0.103722	0.122953	0.0346647	0.265589	0.110109	0.0862916	0.088968	0.0687863	0.0803443	0.0821367
312	312	0.308934	0.255632	0.0809017	0.0661983	0.109865	0.129454	0.0764406	0.265537	0.11862	0.0953559	0.0845295	0.0736386	0.0811071	0.0721876
313	313	0.366003	0.2229	0.0947759	0.0675296	0.103376	0.124825	0.0521407	0.265182	0.0973745	0.0906933	0.0646088	0.0797721	0.074426	0.0696754
314	314	0.213088	0.197605	0.0834969	0.0640138	0.101896	0.104196	0.0983417	0.253361	0.111432	0.105371	0.0938775	0.0681044	0.0798254	0.0938723
315	315	0.198468	0.217972	0.080786	0.0471786	0.111158	0.10275	0.0667639	0.270083	0.116973	0.142403	0.105061	0.0741506	0.0553785	0.0979796
316	316	0.216264	0.204436	0.0814435	0.0616503	0.105329	0.0916334	0.0835306	0.290739	0.123391	0.130878	0.108957	0.0714484	0.062161	0.0708402
317	317	0.246334	0.187965	0.0921212	0.0558079	0.0962903	0.094639	0.095953	0.270646	0.16234	0.0657022	0.0529265	0.0603989	0.0672646	0.0773593
318	318	0.251353	0.196875	0.0801805	0.0618453	0.0970718	0.0693282	0.0886827	0.202756	0.138075	0.0822914	0.0532615	0.0667121	0.0538882	0.0734123
319	319	0.202649	0.184961	0.0816579	0.0571528	0.0951526	0.0716457	0.0987301	0.109278	0.18366	0.0711589	0.0605794	0.0674716	0.0876642	0.0713354
320	320	0.148737	0.189985	0.0748999	0.0518117	0.0928168	0.0761946	0.0868687	0.189987	0.186289	0.0796515	0.0683515	0.0734341	0.0678572	0.0779072
321	321	0.162564	0.180088	0.085109	0.0493653	0.104194	0.0730861	0.0939226	0.217573	0.16	0.0638432	0.073443	0.0738777	0.0584615	0.0685791
322	322	0.270715	0.165376	0.0786189	0.0533333	0.0958502	0.0777409	0.100525	0.181102	0.147335	0.0628752	0.073678	0.0590243	0.0562541	0.0729053
323	323	0.203504	0.205916	0.103872	0.053144	0.0835735	0.0851548	0.111197	0.305372	0.235504	0.0521212	0.0471814	0.0756672	0.0463252	0.0733102
324	324	0.151726	0.191103	0.0818071	0.0597763	0.0768918	0.085898	0.0808424	0.33382	0.197906	0.0586146	0.0271424	0.0756205	0.0350877	0.0844404
325	325	0.195339	0.18113	0.0859157	0.0556369	0.0767888	0.0873515	0.0569639	0.302134	0.171117	0.0626492	0.0271206	0.0841071	0.0659384	0.0855803
326	326	0.188684	0.175687	0.0793778	0.0621908	0.0788912	0.0807812	0.0955376	0.261561	0.0730253	0.0441861	0.037893	0.0708791	0.0826865	0.0828916
327	327	0.195743	0.177274	0.0968951	0.0529248	0.102889	0.0749671	0.0920208	0.233333	0.21202	0.0385557	0.058651	0.101441	0.0790711	0.0761372
328	328	0.0964528	0.195515	0.0711307	0.0555359	0.0901555	0.0729652	0.0695443	0.213647	0.172356	0.107333	0.0634882	0.0778872	0.051272	0.0735568
329	329	0.128282	0.169231	0.0974916	0.0546762	0.0939759	0.0933148	0.0764488	0.226568	0.125658	0.104793	0.0504945	0.0794322	0.0669739	0.0687558
330	330	0.141073	0.170499	0.0996106	0.0670047	0.1027	0.100796	0.0738916	0.19878	0.106885	0.0325878	0.0818434	0.0790256	0.0542547	0.0824649
331	331	0.192638	0.211544	0.0745392	0.0354243	0.098334	0.125356	0.0777055	0.128911	0.0947969	0.0483718	0.0865023	0.0799001	0.0758235	0.0821949
332	332	0.182165	0.211679	0.128147	0.0496777	0.104867	0.144994	0.0838252	0.0790791	0.0787022	0.0998949	0.0651508	0.0725436	0.147185	0.0602867
333	333	0.157467	0.171911	0.095192	0.0605822	0.0941039	0.130821	0.107622	0.061974	0.0583815	0.018133	0.106199	0.078733	0.0727377	0.0719935
334	334	0.155949	0.228476	0.116547	0.062274	0.0856597	0.138686	0.106493	0.050936	0.03743	-0.04581	-0.0724638	0.0872803	0.0711631	0.0894074
335	335	0.190598	0.184364	0.0995411	0.0756908	0.0786559	0.202542	0.0755341	0.17067	0.0183406	-0.123832	-0.0863836	0.0692834	0.0630216	0.0856472
336	336	0.193017	0.177952	0.133973	0.0649682	0.0872345	0.212121	0.0949495	0.151742	0.0141609	-0.0989011	-0.0650069	0.0526316	0.0722543	0.0803221
337	337	0.20929	0.21059	0.108777	0.102504	0.0868846	0.204661	0.106471	0.171306	0.0157303	-0.099537	0.0134159	0.0560304	0.0717703	0.0950283
338	338	0.252118	0.21994	0.119185	0.12549	0.0886232	0.218338	0.142489	0.206438	0.0424687	-0.0392799	0.108171	0.0547619	0.0623583	0.0863341
339	339	0.189302	0.202169	0.100802	0.0941504	0.0952284	0.156896	0.128944	0.199	0.0714505	-0.00635325	0.105232	0.0714911	0.0469974	0.0949821
340	340	0.130579	0.244069	0.085475	0.0529983	0.086072	0.0987846	0.156835	0.245723	0.0838471	0.016739	0.0922473	0.0699216	0.0584915	0.107997
341	341	0.169811	0.22562	0.107033	0.0422046	0.0957692	0.0961207	0.187994	0.264785	0.104551	0.0512163	0.118075	0.0705275	0.0562948	0.0992457
342	342	0.238671	0.221944	0.0854192	0.0265713	0.0912548	0.115987	0.216901	0.222043	0.112802	0.0825472	0.195767	0.0629332	0.0661421	0.0910743
343	343	0.215415	0.22475	0.11559	0.0175991	0.0942273	0.167339	0.179421	0.206522	0.101813	0.0367412	0.121554	0.0684611	0.0502766	0.0795555
344	344	0.15684	0.202722	0.116408	0.0642318	0.0814668	0.199132	0.191036	0.221024	0.0892351	0.0470501	0.116063	0.0585696	0.0535323	0.0755149
345	345	0.132645	0.223522	0.125839	0.0445187	0.0788743	0.188185	0.169682	0.235037	0.0862132	0.0291611	0.0904978	0.0588235	0.0381288	0.0849442
346	346	0.117333	0.266031	0.113918	0.0551831	0.0834959	0.186738	0.196089	0.239833	0.0951175	0.00328947	0.142352	0.058715	0.0401269	0.0895522
347	347	0.163452	0.222804	0.112775	0.063601	0.0808694	0.17988	0.23569	0.208747	0.0828619	0.0285909	0.196489	0.0636364	0.0443366	0.0911162
348	348	0.199039	0.200345	0.0868452	0.0609395	0.0876422	0.154539	0.220986	0.252187	0.0909724	0.0304601	0.143341	0.0736253	0.0447306	0.0902478
349	349	0.218326	0.199781	0.0729635	0.0656008	0.0844601	0.116279	0.20411	0.202888	0.123842	0.00135761	0.141932	0.068885	0.0539933	0.0729147
350	350	0.230947	0.283369	0.0833552	0.0683139	0.085846	0.100536	0.0847029	0.17568	0.0958269	0.0599903	0.0985545	0.0669828	0.0364691	0.0838864
351	351	0.201984	0.216796	0.0649071	0.0697782	0.0812183	0.111504	0.0205931	0.229075	0.0812013	0.0628192	0.134418	0.0662406	0.048243	0.0815208
352	352	0.211429	0.191338	0.071892	0.0451807	0.0936926	0.134392	0.0313866	0.232228	0.111438	0.0700703	0.135757	0.0585859	0.0517241	0.0707341
353	353	0.25709	0.221794	0.0867531	0.0527758	0.106164	0.119714	0.0330709	0.203682	0.118227	0.0697675	0.139599	0.0591954	0.0508104	0.0793651
354	354	0.237941	0.182763	0.0796915	0.065077	0.102008	0.0859599	0.0623441	0.228766	0.114462	0.140398	0.126531	0.0787545	0.0640205	0.0748653
355	355	0.262644	0.195835	0.0920279	0.0623839	0.0966674	0.0761628	0.057554	0.234273	0.1262	0.109718	0.0676692	0.0812079	0.0668747	0.0765847
356	356	0.187874	0.191189	0.104087	0.0647091	0.088921	0.103	0.0845887	0.207286	0.135926	0.112544	0.0897326	0.0753055	0.0742948	0.0987125
357	357	0.197409	0.202237	0.0794979	0.0461625	0.0952679	0.101991	0.0590875	0.257996	0.141661	0.113065	0.0522479	0.0757667	0.0760977	0.0908314
358	358	0.204235	0.198444	0.0820383	0.0604411	0.0916684	0.104846	0.0911071	0.264	0.134548	0.0827874	0.0617559	0.0637376	0.0650168	0.0700809
359	359	0.240947	0.203496	0.0941985	0.0572207	0.0941392	0.0954424	0.122981	0.234717	0.180255	0.0534542	0.105048	0.0541806	0.0471163	0.0798845
360	360	0.236851	0.210493	0.0814678	0.0710349	0.0966834	0.0894806	0.0439716	0.203264	0.15554	0.101396	0.0891582	0.0632102	0.0419918	0.0809683
361	361	0.172028	0.195632	0.0874615	0.0562823	0.0898039	0.0840096	0.101897	0.16388	0.200145	0.0869822	0.0679844	0.0595399	0.0475285	0.0683687
362	362	0.148605	0.199067	0.0838693	0.0660523	0.0912606	0.077839	0.0779184	0.208481	0.174697	0.0555725	0.08568	0.0665779	0.0560818	0.0888382
363	363	0.20576	0.18372	0.0871445	0.0691949	0.081559	0.0934394	0.0662687	0.190402	0.141406	0.0526981	0.0978018	0.0756131	0.073151	0.0840046
364	364	0.312773	0.167935	0.0895897	0.0673007	0.0807221	0.0829096	0.0837912	0.241546	0.184075	0.0683112	0.0841999	0.0677966	0.076602	0.0797034
365	365	0.193244	0.221872	0.10108	0.064945	0.0822151	0.0695843	0.0716312	0.200341	0.249194	0.0614525	0.0723066	0.068713	0.0848512	0.0685676
366	366	0.147158	0.222126	0.0667132	0.0712953	0.0661919	0.0834813	0.0865116	0.245704	0.20983	0.0658436	0.0686633	0.0704225	0.0675944	0.0885961
367	367	0.17975	0.190249	0.0936685	0.0537175	0.086713	0.0735719	0.0690179	0.249428	0.178105	0.0522895	0.0706797	0.0759494	0.0348163	0.0820501
368	368	0.181694	0.18869	0.0808119	0.053398	0.096831	0.0829004	0.0748137	0.247295	0.137432	0.0469997	0.0622382	0.0722519	0.0537587	0.0760895
369	369	0.216695	0.191581	0.101263	0.0618915	0.0887626	0.0893306	0.0961707	0.17321	0.135354	0.0313802	0.0611365	0.0864198	0.0739839	0.0760318
370	370	0.0908411	0.212754	0.0807468	0.0491202	0.0873033	0.0739665	0.0904143	0.173594	0.121019	0.0356294	0.0529743	0.0813884	0.0577025	0.0665105
371	371	0.0828179	0.202267	0.0853618	0.0541728	0.0962555	0.0845102	0.0690452	0.153886	0.0321811	0.0717931	0.0839002	0.0954683	0.0801559	0.0793055
372	372	0.148474	0.212625	0.0836776	0.063173	0.0928279	0.0902273	0.0671141	0.121248	0.132367	0.0341625	0.0912667	0.0843155	0.0634538	0.0765136
373	373	0.144999	0.211373	0.0852918	0.0342152	0.0938349	0.0869261	0.0739183	0.116699	0.12016	0.068168	0.089129	0.0686275	0.0683503	0.0652314
374	374	0.134694	0.216759	0.109275	0.0328834	0.0990119	0.119808	0.0957447	0.08019	0.109422	0.0504544	0.0752351	0.0758495	0.0718264	0.0552904
375	375	0.136059	0.188746	0.113443	0.0529348	0.08936	0.156961	0.112791	0.135365	0.113521	0.0732497	0.0705717	0.0789633	0.0791589	0.0760913
376	376	0.132691	0.243226	0.13652	0.06593	0.11381	0.146218	0.0976797	0.123258	0.0949574	-0.0378301	0.0569244	0.0863844	0.069782	0.0762295
377	377	0.154902	0.231106	0.0972067	0.0634146	0.0921821	0.140818	0.0852145	0.173115	0.0808961	-0.010846	-0.0634697	0.0616802	0.0683091	0.0704286
378	378	0.183861	0.248634	0.124642	0.0611247	0.0883202	0.206197	0.0882681	0.176164	0.0317369	-0.0561478	-0.0762463	0.0445087	0.0509954	0.0900095
379	379	0.175179	0.251741	0.0995947	0.0394198	0.106282	0.207299	0.113159	0.180351	0.00996888	0.0132979	-0.0821114	0.0711247	0.0713034	0.0946583
380	380	0.165762	0.238806	0.108495	0.0610989	0.096747	0.203352	0.145689	0.180116	0.00925267	-0.0182047	0.0062893	0.0759455	0.0700855	0.0779221
381	381	0.217019	0.238255	0.0882114	0.0920716	0.088765	0.215667	0.122143	0.175251	0.0505403	-0.0128277	0.0601307	0.0802963	0.0561798	0.102243
382	382	0.230725	0.248246	0.0925561	0.0897155	0.104484	0.210822	0.0648464	0.226808	0.06624	0.00241197	0.082265	0.0737852	0.0530325	0.0947093
383	383	0.136905	0.223017	0.141268	0.0760095	0.110651	0.156003	0.114943	0.198387	0.0508965	0.0380205	0.079646	0.0775813	0.0613274	0.0931868
384	384	0.13607	0.183493	0.0887142	0.0419194	0.0863295	0.119296	0.138889	0.170601	0.056902	0.0596299	0.153671	0.067763	0.0759625	0.0897722
385	385	0.192684	0.208024	0.118265	0.0358357	0.090325	0.133764	0.143564	0.239806	0.108497	0.0153417	0.120364	0.0669122	0.0653367	0.090432
386	386	0.188606	0.22963	0.111573	0.0513124	0.09375	0.193798	0.151255	0.240456	0.138726	0.0700179	0.101366	0.0564005	0.0575316	0.0867095
387	387	0.149449	0.214035	0.101662	0.0463692	0.0871632	0.200499	0.165928	0.246154	0.113895	0.0569307	0.0347305	0.0624815	0.0558101	0.0801034
388	388	0.137149	0.226742	0.0947047	0.048474	0.0810382	0.192043	0.108647	0.252971	0.116279	0.0251163	0.0206897	0.0659692	0.0557645	0.074599
389	389	0.116194	0.242991	0.109523	0.052861	0.0862443	0.176972	0.113384	0.240275	0.116531	0.0409836	0.0799683	0.0604765	0.0507418	0.0940138
390	390	0.14229	0.263403	0.0906024	0.0553895	0.078665	0.14041	0.197817	0.236149	0.073831	0.0533563	0.13615	0.0706703	0.0460866	0.0743557
391	391	0.185806	0.235521	0.076537	0.072324	0.0922479	0.115128	0.161067	0.249562	0.134167	0.0169092	0.142857	0.074228	0.0538765	0.088033
392	392	0.188641	0.29004	0.0712971	0.0548292	0.0885009	0.0830251	0.205603	0.229246	0.100221	0.0419886	0.181039	0.07532	0.0501816	0.0899567
393	393	0.176409	0.234883	0.0530997	0.056595	0.0922868	0.07821	0.165332	0.170519	0.0802972	0.0517831	0.0984204	0.07287	0.0591025	0.0794165
394	394	0.179032	0.185165	0.0490905	0.0704091	0.106316	0.0983213	0.080418	0.174073	0.108533	0.0600956	0.120216	0.0780829	0.0602368	0.0903729
395	395	0.18539	0.19057	0.0658507	0.0501462	0.115314	0.137379	0.0659609	0.269734	0.123298	0.055341	0.147488	0.0682429	0.0731075	0.0777621
396	396	0.222133	0.207524	0.0958542	0.0533068	0.0999597	0.101004	0.0373609	0.299316	0.110264	0.0689942	0.147385	0.072241	0.075115	0.078009
397	397	0.222552	0.195782	0.0867769	0.055833	0.0923171	0.0832851	0.0478088	0.220642	0.113068	0.146556	0.145177	0.0766803	0.0724138	0.0756911
398	398	0.204895	0.200601	0.0895461	0.0652333	0.104423	0.101062	0.0624103	0.20726	0.18613	0.0989483	0.112117	0.0627512	0.0713141	0.0665319
399	399	0.194503	0.190449	0.0823814	0.0611082	0.103633	0.0970788	0.109244	0.254172	0.171186	0.0993214	0.137647	0.0682438	0.0645817	0.0971749
400	400	0.183729	0.185185	0.0949246	0.0400201	0.103845	0.088744	0.0500197	0.231095	0.146223	0.0850287	0.0893884	0.0699904	0.055033	0.106284
401	401	0.176393	0.184241	0.0913168	0.0487622	0.0793151	0.0844047	0.0909091	0.257494	0.147354	0.0794045	0.110537	0.0612512	0.0540052	0.102426
402	402	0.213446	0.185851	0.0904812	0.0563075	0.0966726	0.0811267	0.0871166	0.21928	0.153345	0.0755306	0.141926	0.0545939	0.0603695	0.0820101
403	403	0.237898	0.200593	0.0845903	0.0717131	0.0972222	0.0956154	0.0363086	0.159288	0.169187	0.0738619	0.122007	0.0747541	0.0591323	0.0728908
404	404	0.146381	0.205882	0.0903599	0.074594	0.0930861	0.0906291	0.0650888	0.134029	0.185105	0.0618798	0.0814696	0.0679491	0.0851465	0.0718846
405	405	0.135441	0.190944	0.0884817	0.0639208	0.0922196	0.0886589	0.0101258	0.0855389	0.141357	0.0508474	0.0653267	0.0725085	0.0710506	0.0722198
406	406	0.219118	0.178475	0.0936741	0.0660618	0.0850783	0.0815412	0.110454	0.108202	0.135987	0.0348042	0.09062	0.081607	0.06888	0.0904915
407	407	0.275281	0.193121	0.0843534	0.0646734	0.0880503	0.0904678	0.0460311	0.106238	0.187854	0.0496894	0.120896	0.08928	0.0638368	0.0881934
408	408	0.179351	0.211054	0.100357	0.0642881	0.0718769	0.0930285	0.0400572	0.109567	0.161844	0.0701378	0.0656285	0.0682337	0.055058	0.0813375
409	409	0.16242	0.215634	0.0955492	0.0639665	0.0966921	0.0860429	0.0842424	0.115687	0.148362	0.0667875	0.100449	0.0810449	0.0546227	0.0818584
410	410	0.186154	0.236405	0.0690926	0.0801527	0.0887417	0.0859216	0.0697264	0.16875	0.178979	0.0502067	0.101429	0.0941872	0.053927	0.0812802
411	411	0.184509	0.222191	0.0877747	0.0462157	0.0841161	0.0793722	0.0637931	0.17497	0.115179	0.0380562	0.0953736	0.0885341	0.0565262	0.0692571
412	412	0.225573	0.215127	0.0813094	0.0456574	0.0844721	0.0901001	0.0827286	0.143668	0.103113	0.0521985	0.108425	0.0720238	0.0685464	0.0717682
413	413	0.241289	0.205697	0.0993698	0.0600355	0.0819465	0.094442	0.101785	0.111658	-0.0196672	0.0176532	0.115426	0.0739982	0.0963487	0.0890102
414	414	0.0868842	0.189887	0.0756053	0.0660411	0.0878716	0.0727715	0.0842596	0.107375	-0.0752351	0.0383824	0.0867865	0.094297	0.10291	0.0682578
415	415	0.099324	0.193585	0.0778402	0.062927	0.0870736	0.0926052	0.113509	0.131653	0.0814815	0.0386815	0.184165	0.0871795	0.0763052	0.0821662
416	416	0.140593	0.210278	0.084271	0.0505328	0.0704736	0.0961896	0.0730061	0.152335	0.148609	0.0433133	0.126348	0.0710094	0.0548609	0.0783848
417	417	0.148261	0.216099	0.106389	0.0454397	0.0811524	0.0832184	0.107739	0.0819758	0.151181	0.0670788	0.146645	0.0630202	0.0687687	0.0693558
418	418	0.088739	0.244684	0.100663	0.0395257	0.10106	0.14919	0.121387	0.0654297	0.165912	0.0761458	0.158845	0.0621437	0.0721283	0.0748115
419	419	0.115449	0.296755	0.107948	0.0441713	0.0924508	0.208201	0.0952381	0.0698614	0.112233	0.0376658	0.124251	0.0727273	0.0646117	0.0801313
420	420	0.109125	0.295157	0.0975834	0.039209	0.0750548	0.180669	0.0873587	0.0708662	0.125687	-0.0275808	-0.0750988	0.0677521	0.0626492	0.0781186
421	421	0.118292	0.291536	0.120389	0.0527797	0.0907246	0.159294	0.11189	0.155662	0.121325	0.0167598	-0.0012121	0.0491435	0.0591597	0.084322
422	422	0.133137	0.288224	0.125219	0.0753086	0.0936392	0.199183	0.104581	0.183089	0.07326	-0.0474383	-0.0410257	0.0684259	0.0829744	0.0803004
423	423	0.135651	0.272438	0.0884718	0.0460177	0.0882479	0.181752	0.107203	0.180351	0.0498687	-0.00959691	-0.0121065	0.0616754	0.0725327	0.0848277
424	424	0.136649	0.248265	0.105748	0.0647378	0.101034	0.193359	0.0903362	0.154229	0.0255044	-0.0054397	0.0576565	0.0683634	0.0586888	0.097657
425	425	0.174746	0.236389	0.0947327	0.074392	0.102662	0.214855	0.1133	0.160828	0.0204537	0.0013423	0.0915462	0.063981	0.0563625	0.100738
426	426	0.200941	0.233522	0.0918553	0.0853175	0.104922	0.239793	0.136042	0.218361	0.0455746	0.030648	0.109929	0.0722284	0.0598966	0.0899631
427	427	0.179181	0.231132	0.160673	0.0777742	0.113636	0.181911	0.10522	0.202381	0.0614867	0.0468262	0.0939227	0.0573653	0.0332759	0.0974068
428	428	0.129775	0.176531	0.119196	0.0452436	0.100444	0.14524	0.105732	0.207228	0.0496415	0.0352697	0.0845617	0.0584976	0.0461838	0.101823
429	429	0.120699	0.226528	0.12277	0.0401519	0.0910876	0.127774	0.101464	0.240876	0.0974885	-0.0264194	0.128951	0.0540118	0.0453158	0.086351
430	430	0.131443	0.29525	0.092599	0.0514763	0.0941014	0.174433	0.122655	0.233099	0.112293	0.0587613	0.1185	0.0600115	0.0671992	0.0888454
431	431	0.125088	0.238333	0.0813664	0.0482107	0.0897436	0.188194	0.134166	0.253908	0.122544	0.0258365	0.0565167	0.0699664	0.0436491	0.0843193
432	432	0.124205	0.244131	0.101435	0.0595482	0.0906907	0.180409	0.1113	0.314448	0.141283	0.0296268	0.106341	0.0634016	0.0410156	0.0783356
433	433	0.123918	0.309954	0.0869565	0.0535602	0.0982659	0.151585	0.120379	0.288519	0.14763	0.00419582	0.100546	0.0554386	0.0588014	0.0885864
434	434	0.153566	0.343215	0.0809993	0.0430566	0.0957255	0.115622	0.175735	0.245699	0.101727	0.00495991	0.122807	0.0611971	0.0609901	0.0813799
435	435	0.169357	0.279649	0.0554543	0.0651181	0.108174	0.0853002	0.174129	0.234261	0.104575	-0.0140105	0.11007	0.0774033	0.0659594	0.106494
436	436	0.132017	0.293804	0.0617149	0.065417	0.11467	0.0656324	0.167779	0.215764	0.116692	0.0137195	0.152927	0.0654257	0.0664119	0.0825945
437	437	0.160167	0.209357	0.0506024	0.0498449	0.101685	0.0803163	0.226313	0.181854	0.125712	0.00804566	0.108935	0.0759528	0.0703534	0.089342
438	438	0.175171	0.199683	0.0530511	0.0722131	0.105675	0.1174	0.204178	0.188465	0.112714	0.0480198	0.153579	0.0485168	0.0688219	0.070615
439	439	0.170481	0.191727	0.0606635	0.0694953	0.109742	0.142928	0.121404	0.274785	0.127289	0.0478696	0.127498	0.0691275	0.066481	0.0766306
440	440	0.171146	0.23949	0.100819	0.0566384	0.109028	0.105204	0.0408248	0.261952	0.134641	0.0771291	0.161577	0.0694158	0.0734089	0.0789573
441	441	0.224058	0.231642	0.0924713	0.061445	0.102381	0.0835253	0.0205894	0.201918	0.10383	0.0917615	0.154774	0.0779384	0.0669779	0.0716221
442	442	0.235009	0.213154	0.0911057	0.0713578	0.104187	0.112755	0.0538966	0.188724	0.173149	0.0888446	0.122511	0.0778934	0.0768673	0.0782758
443	443	0.267528	0.189124	0.0888484	0.0461838	0.0960566	0.0942554	0.0694106	0.203772	0.192096	0.101699	0.127962	0.0793454	0.0849325	0.0721992
444	444	0.233464	0.198471	0.111888	0.0368155	0.0955313	0.0811097	0.053447	0.205266	0.140642	0.077697	0.117714	0.0679734	0.0967099	0.0944594
445	445	0.180668	0.20286	0.0758907	0.049729	0.090458	0.0846233	0.0787462	0.19578	0.12547	0.07442	0.165981	0.0758123	0.0956706	0.102209
446	446	0.196674	0.187034	0.0884601	0.0528376	0.0847721	0.0830852	0.0711065	0.160158	0.143266	0.0696126	0.0892086	0.0612372	0.0887033	0.07344
447	447	0.234165	0.16774	0.0782759	0.0595889	0.0994012	0.0967913	0.0689297	0.136638	0.187364	0.0484018	0.0448549	0.0641647	0.083078	0.0787519
448	448	0.137694	0.165909	0.0955476	0.07567	0.0975232	0.101994	0.0469498	0.117425	0.137002	0.0529164	0.0952707	0.087762	0.0661099	0.0801236
449	449	0.148333	0.225564	0.0737387	0.0576973	0.087824	0.0927972	0	0.108393	0.113954	0.0569007	0.125878	0.109155	0.0740271	0.0804124
450	450	0.227294	0.225198	0.0914649	0.0729685	0.0874597	0.0926676	0.066512	0.116237	0.105573	0.0464622	0.124502	0.109388	0.0636492	0.0977052
451	451	0.356849	0.18202	0.0948232	0.0651856	0.0687891	0.0800531	0.0821744	0.0878274	0.191919	0.0542403	0.142414	0.0996224	0.0691703	0.0846439
452	452	0.240411	0.205962	0.0929606	0.0616279	0.0782645	0.0791648	0.0963944	0.0788724	0.184633	0.0525999	0.121482	0.0908556	0.0606061	0.0639239
453	453	0.173241	0.231929	0.086929	0.0651163	0.0910227	0.0934768	0.0846039	0.0688151	0.124128	0.0461068	0.133062	0.0783078	0.0539207	0.0790961
454	454	0.174201	0.214003	0.0835566	0.0497573	0.0854971	0.0770945	0.085602	0.0644161	0.155894	0.0468612	0.103807	0.0824742	0.0590171	0.0811554
455	455	0.199322	0.221275	0.099216	0.0433108	0.0924066	0.0916242	0.0950484	0.0824706	0.117538	0.0479835	0.155934	0.0853795	0.0556315	0.0707678
456	456	0.237657	0.229494	0.0871484	0.0473684	0.092323	0.088717	0.0952934	0.0971555	0.0868761	0.0700249	0.129202	0.0922636	0.0658239	0.0735989
457	457	0.250158	0.223127	0.0898787	0.0527376	0.0899603	0.0852713	0.0862233	0.108779	-0.0347003	0.0792135	0.0991788	0.0667454	0.0736968	0.0812287
458	458	0.147648	0.217819	0.0735168	0.0642449	0.0898973	0.0825487	0.0928419	0.099232	-0.0790698	0.115332	0.0538738	0.0551586	0.100878	0.0748208
459	459	0.135156	0.225871	0.0850821	0.0522257	0.0958242	0.0766891	0.0938018	0.115486	0.0270271	0.0940512	0.092077	0.0620239	0.115817	0.0744186
460	460	0.132139	0.217891	0.0879015	0.0590747	0.0923289	0.0792669	0.0763765	0.10082	0.128713	0.0852865	0.130687	0.0757014	0.122899	0.0968717
461	461	0.170207	0.203663	0.102681	0.0541566	0.0862189	0.0857783	0.0983607	0.0903558	0.0955621	0.0755758	0.0926366	0.0805018	0.0635038	0.0711864
462	462	0.171763	0.234014	0.0936819	0.0423757	0.0896521	0.0877193	0.0856769	0.121083	0.108779	0.0369003	0.109677	0.0709677	0.0489611	0.0827068
463	463	0.109723	0.250264	0.116213	0.0378053	0.0836062	0.142381	0.0590909	0.131205	0.134103	0.0507706	0.0800206	0.0613607	0.0652802	0.0755949
464	464	0.0988336	0.278642	0.0882053	0.0418225	0.0809534	0.204312	0.0840975	0.161949	0.139314	0.0515464	0.113876	0.0609504	0.0641532	0.088783
465	465	0.108395	0.306036	0.135276	0.0306462	0.0808254	0.195147	0.11593	0.168	0.122888	-0.025974	-0.0638298	0.0692389	0.0601589	0.0803571
466	466	0.123313	0.293879	0.124562	0.0514403	0.0797056	0.199286	0.082676	0.178637	0.105828	0.00445762	0.0589391	0.0622063	0.0634202	0.0739452
467	467	0.133484	0.282899	0.0874074	0.068933	0.0948226	0.196988	0.091034	0.15683	0.112284	-0.000606438	0.0224321	0.0625362	0.0575916	0.0895603
468	468	0.122245	0.284276	0.112644	0.0723039	0.0845637	0.178705	0.092115	0.198727	0.0646627	-0.00136053	-0.00546452	0.0706056	0.0692568	0.089939
469	469	0.155016	0.260112	0.0945463	0.0584081	0.0921313	0.233564	0.0985096	0.186484	0.0394548	0.00971661	0.0320115	0.0748538	0.082318	0.0930564
470	470	0.176346	0.25586	0.0915202	0.0644439	0.0856669	0.239214	0.114504	0.230492	0.0168674	0.00811032	0.072449	0.0667454	0.0618752	0.106219
471	471	0.18696	0.235661	0.0984043	0.0946108	0.107296	0.251226	0.126116	0.262198	0.043931	0.0141509	0.0566727	0.0684932	0.0541949	0.101962
472	472	0.187271	0.202092	0.106703	0.0852825	0.105632	0.198464	0.0638298	0.252074	0.0795563	0.0210186	0.0263459	0.0470765	0.0586997	0.0965368
473	473	0.157895	0.216728	0.100488	0.066879	0.10886	0.145587	0.142595	0.285366	0.0756144	0.000772811	0.0724864	0.0467637	0.0478383	0.0898204
474	474	0.118549	0.308716	0.068803	0.054683	0.097973	0.124406	0.112848	0.274887	0.088	0.00954033	0.147022	0.0608045	0.0438679	0.0913536
475	475	0.123462	0.368543	0.0916031	0.0511379	0.108674	0.154854	0.147022	0.227329	0.0662393	-0.0057622	0.168443	0.0592425	0.0599038	0.0985495
476	476	0.122103	0.343841	0.0857548	0.0419321	0.0964586	0.164377	0.0890688	0.284573	0.136162	0.110251	0.111473	0.0562891	0.0640157	0.090215
477	477	0.140562	0.341014	0.0972984	0.0635046	0.0987224	0.138425	0.0917431	0.252595	0.152174	0.116471	0.085261	0.0528031	0.0540054	0.0841297
478	478	0.152513	0.337218	0.0756152	0.0537794	0.103448	0.124339	0.108472	0.250548	0.130376	0.0439883	0.0670996	0.0707134	0.046431	0.081922
479	479	0.151407	0.292887	0.0377885	0.049612	0.105826	0.0990953	0.141818	0.172927	0.115082	0.0621469	0.0466321	0.0523365	0.0514019	0.0929648
480	480	0.157989	0.265823	0.0712603	0.055063	0.106325	0.0680396	0.149468	0.200953	0.148506	0.0359281	0.126697	0.0727384	0.0595843	0.0903509
481	481	0.152611	0.289915	0.0521792	0.0356096	0.112162	0.0595736	0.123881	0.193961	0.167155	0.02443	0.155161	0.0662177	0.0582882	0.108544
482	482	0.178878	0.267544	0.0825737	0.0432834	0.0942367	0.081381	0.161677	0.244272	0.188828	0.0029516	0.16731	0.075862	0.0640063	0.0807395
483	483	0.168054	0.243368	0.0601875	0.0566841	0.0979631	0.12152	0.211792	0.235368	0.11415	0.0514529	0.128018	0.0518054	0.0591379	0.0830971
484	484	0.188291	0.230288	0.0558059	0.0787988	0.109795	0.148309	0.163509	0.214754	0.135758	0.052059	0.120406	0.0560159	0.0792748	0.0694033
485	485	0.192499	0.258561	0.0948658	0.0614603	0.113863	0.118531	0.0724157	0.273415	0.146082	0.0438642	0.116352	0.0728402	0.0867405	0.0811485
486	486	0.23396	0.284026	0.106688	0.0634215	0.104022	0.0892857	0.0278638	0.237028	0.081081	0.077639	0.156852	0.0701755	0.0855683	0.0716298
487	487	0.271628	0.276015	0.0935611	0.07015	0.0929784	0.105058	0.0290076	0.132104	0.148658	0.0969152	0.202373	0.0805476	0.0608602	0.0665302
488	488	0.287264	0.190009	0.0897453	0.0598952	0.0978365	0.0874741	0.019802	0.103864	0.179462	0.108905	0.154433	0.0784939	0.0669138	0.087891
489	489	0.219341	0.201663	0.100516	0.0490303	0.0882925	0.0766997	0.00927487	0.11544	0.164211	0.0704819	0.127844	0.0756356	0.075223	0.0645299
490	490	0.168575	0.193702	0.101331	0.0457038	0.094186	0.0883427	0.0846246	0.111111	0.183489	0.0538886	0.191573	0.0740137	0.0661668	0.105744
491	491	0.162346	0.199416	0.0745906	0.0502325	0.0932551	0.0862569	0.0833948	0.139685	0.203329	0.0898533	0.159806	0.074903	0.0745856	0.0860521
492	492	0.162842	0.209848	0.095172	0.0467027	0.0881057	0.0878811	0.06875	0.111774	0.213834	0.0639324	0.163966	0.097693	0.0694148	0.0707149
493	493	0.135172	0.200963	0.0920336	0.0682448	0.0887386	0.08523	0.0623756	0.132876	0.168548	0.0541931	0.113466	0.112173	0.0696038	0.0891929
494	494	0.140369	0.244386	0.0838768	0.0583903	0.0848496	0.0889584	0.0288392	0.131528	0.101174	0.0484018	0.0839416	0.110341	0.0810811	0.0796755
495	495	0.197789	0.241675	0.0732839	0.0750485	0.0750958	0.092079	0.0858047	0.120307	0.137514	0.0519599	0.183617	0.0913907	0.0802595	0.0909499
496	496	0.281278	0.213873	0.107258	0.0692536	0.0847656	0.0866211	0.0641905	0.0958002	0.169492	0.0514793	0.11685	0.0996451	0.0783798	0.0931768
497	497	0.208378	0.22695	0.0891192	0.0490527	0.106277	0.0753513	0.0707842	0.081528	0.145194	0.0588235	0.111198	0.0964769	0.0862183	0.0968459
498	498	0.175332	0.210094	0.0835996	0.0503597	0.0859458	0.0758767	0.0573325	0.0989137	0.0966576	0.042022	0.189147	0.094486	0.0805804	0.0782933
499	499	0.157924	0.219264	0.0913992	0.0549075	0.0858106	0.0864926	0.0516995	0.0839738	0.152975	0.0502761	0.132521	0.0701069	0.0723878	0.0894481
500	500	0.172191	0.258864	0.0870057	0.0409836	0.0849001	0.0810571	0.0534699	0.0779295	0.192537	0.0809693	0.109312	0.0819514	0.0747061	0.0876466
501	501	0.226801	0.234483	0.114165	0.0387838	0.0895701	0.087444	0.115297	0.089587	0.0919652	0.0739082	0.0964513	0.0755533	0.0757605	0.0919458
502	502	0.256291	0.209288	0.101748	0.0461835	0.0832134	0.0884658	0.0889358	0.0956072	0.00973575	0.0727949	0.0721027	0.0783463	0.0720316	0.0838446
503	503	0.252315	0.207956	0.0782836	0.0593112	0.0973414	0.0770578	0.0772116	0.124485	0.020202	0.12766	0.0758833	0.061693	0.0756766	0.0772666
504	504	0.143404	0.212511	0.0806161	0.0437396	0.102938	0.0687122	0.0795455	0.115286	0.0670611	0.144289	0.053721	0.0628099	0.119119	0.0754215
505	505	0.151217	0.223954	0.0808775	0.0554966	0.0907182	0.0730778	0.0889991	0.0886966	0.0674286	0.0652174	0.0742886	0.0543217	0.128645	0.0863185
506	506	0.167447	0.200358	0.0870287	0.0472441	0.113167	0.0750853	0.091393	0.088739	0.0829444	0.0460594	0.102913	0.0526038	0.124461	0.0870352
507	507	0.149728	0.208141	0.0725222	0.046143	0.0998484	0.0791685	0.0681676	0.139574	0.0933989	0.0212595	0.12488	0.0602534	0.055792	0.0575457
508	508	0.115875	0.264252	0.118211	0.0456747	0.078284	0.094208	0.0682456	0.197252	0.0885798	0.0339833	0.119589	0.0682771	0.0475701	0.0833171
509	509	0.107848	0.285614	0.122899	0.0467418	0.0891524	0.129552	0.0984264	0.128083	0.0623347	0.0226087	0.0772074	0.0594011	0.0582751	0.0857891
510	510	0.103091	0.297611	0.0846454	0.0372977	0.0841039	0.168477	0.109794	0.182533	0.121588	0.0456432	-0.0411348	0.0615821	0.0555393	0.0915959
511	511	0.0972222	0.292862	0.0999609	0.0479376	0.0821652	0.191288	0.0944984	0.169919	0.152328	-0.0284718	-0.0885806	0.0574534	0.0523981	0.0757576
512	512	0.110585	0.26544	0.106599	0.0735625	0.089811	0.213658	0.096679	0.182174	0.0639305	0.0159547	0.0225941	0.067788	0.0743076	0.0770996
513	513	0.125367	0.257109	0.0951889	0.0723562	0.0823084	0.200197	0.117865	0.197757	0.069353	-0.00757576	0.0468899	0.0757239	0.0780065	0.0944983
514	514	0.123265	0.24577	0.101243	0.0875631	0.0871338	0.210231	0.0920873	0.223517	0.0726048	0.0103172	0.0297317	0.0739958	0.0751542	0.0879527
515	515	0.130877	0.248709	0.102268	0.0749203	0.0930453	0.245417	0.0507919	0.207028	0.0870147	0.0257771	0.0438356	0.0643882	0.103	0.0864983
516	516	0.185299	0.25974	0.0823201	0.0579212	0.0847526	0.237003	0.0405483	0.216504	0.0465047	-0.00543898	0.15713	0.0650285	0.0659509	0.103195
517	517	0.212387	0.260814	0.0864345	0.121985	0.095494	0.237999	0.0663391	0.210624	0.0298896	0.00803351	0.0318021	0.0658087	0.0613511	0.0973451
518	518	0.194947	0.272846	0.0954686	0.0819546	0.0894113	0.197024	0.0597128	0.160723	0.0845263	0.0173482	0.0493097	0.0649588	0.0482456	0.0975236
519	519	0.180475	0.362546	0.0768381	0.0838709	0.106365	0.144238	0.100079	0.196581	0.102539	0.00963132	0.0537634	0.0724734	0.0417011	0.0939201
520	520	0.147877	0.396552	0.0831711	0.0657683	0.100191	0.127951	0.116393	0.212739	0.0845621	0.0222222	0.128994	0.0565508	0.037831	0.0854317
521	521	0.154796	0.36139	0.076537	0.060241	0.101532	0.126951	0.156808	0.259112	0.0591631	0.056042	0.149099	0.0518665	0.0436223	0.0941355
522	522	0.174587	0.355415	0.0868555	0.0507513	0.0886228	0.102426	0.042654	0.296172	0.0920013	0.151745	0.101742	0.0519703	0.0612245	0.0870947
523	523	0.173955	0.290499	0.0949166	0.0481821	0.0901099	0.0933809	0.111717	0.233571	0.0955414	0.122796	0.0570793	0.0628245	0.0578994	0.0960169
524	524	0.170078	0.270279	0.0705731	0.0547584	0.0897173	0.0927152	0.108247	0.207131	0.0720574	0.0594668	0.102804	0.0693922	0.0443097	0.0812993
525	525	0.164019	0.214748	0.0679942	0.0571737	0.0969661	0.0855333	0.119483	0.218973	0.14933	0.0628698	0.0661521	0.0777872	0.0535801	0.0896435
526	526	0.156518	0.246327	0.0564578	0.0313715	0.104611	0.0698903	0.0948311	0.238913	0.122677	0.0351546	0.0704041	0.0646189	0.0601561	0.0930387
527	527	0.184959	0.280779	0.0570059	0.0455199	0.0993326	0.0658899	0.0973007	0.221385	0.146265	0.0546369	0.0683544	0.0638029	0.0721178	0.101075
528	528	0.199047	0.278363	0.062031	0.0183505	0.0896734	0.0816786	-0.0464241	0.227471	0.186197	-0.010059	0.143843	0.0561865	0.0805925	0.0907788
529	529	0.185603	0.265306	0.0557284	0.0589691	0.101035	0.106709	0.042056	0.202929	0.165627	0.015235	0.117534	0.0610457	0.0631411	0.0868421
530	530	0.171483	0.235004	0.0572503	0.0632675	0.102569	0.138411	0.105678	0.217241	0.180964	0.00554741	0.148851	0.0673352	0.0663086	0.084753
531	531	0.20289	0.222919	0.0901082	0.056231	0.105112	0.121799	0.145859	0.186005	0.167362	0.0294834	0.125281	0.0539917	0.0817686	0.0787242
532	532	0.242718	0.254474	0.108302	0.0619281	0.105612	0.108993	0.0585796	0.138501	0.143469	0.0633653	0.160566	0.0686696	0.0765506	0.0688551
533	533	0.288071	0.262778	0.0938424	0.0623025	0.0947166	0.0974472	0.0232358	0.140708	0.187453	0.0915123	0.113324	0.0694359	0.0801596	0.0829369
534	534	0.258801	0.189712	0.0913199	0.0628803	0.0950019	0.0909978	0.0307755	0.134662	0.139215	0.0783011	0.130231	0.0757575	0.0857459	0.0691672
535	535	0.256971	0.203772	0.0815575	0.0539184	0.090837	0.0895247	0.0335682	0.121367	0.172365	0.0684763	0.126063	0.0821961	0.0977273	0.0893077
536	536	0.190415	0.204045	0.0890234	0.0462287	0.102454	0.0901498	0.0715714	0.101408	0.173604	0.0504673	0.0995816	0.0790244	0.0909795	0.104471
537	537	0.164419	0.176538	0.0848939	0.0417253	0.0935829	0.0868551	0.0880294	0.145344	0.20636	0.0520411	0.10118	0.0783013	0.0773078	0.0818891
538	538	0.146645	0.201778	0.0890654	0.0421824	0.0891548	0.0901266	0.0808541	0.103612	0.231346	0.0503555	0.105683	0.0794743	0.100232	0.080961
539	539	0.13367	0.192273	0.0822192	0.0599029	0.0874285	0.0958281	0.0761233	0.112847	0.152678	0.046299	0.165304	0.0815603	0.0879227	0.097281
540	540	0.154261	0.2	0.0837904	0.055615	0.0839011	0.0743081	0.0736761	0.140118	0.132509	0.0523077	0.136635	0.0898942	0.0924889	0.0897924
541	541	0.233491	0.202367	0.0833738	0.0639749	0.0802891	0.0775005	0.101624	0.117296	0.175775	0.0553192	0.163964	0.0855263	0.081381	0.0953437
542	542	0.244625	0.225825	0.0943034	0.0677669	0.0960655	0.0725579	0.0921502	0.0972914	0.161581	0.0502229	0.154556	0.0885609	0.0972669	0.106746
543	543	0.160429	0.207029	0.0933836	0.0417881	0.0920919	0.0702453	0.0557468	0.101361	0.133374	0.064127	0.156201	0.0890538	0.101243	0.0965218
544	544	0.166667	0.205472	0.0811718	0.0484536	0.086174	0.0782682	0.0233161	0.10242	0.133758	0.0488257	0.154193	0.0933411	0.0925256	0.0678825
545	545	0.156804	0.206742	0.0997473	0.0511821	0.0967195	0.0922177	0.0377302	0.118975	0.146503	0.0695884	0.132456	0.0994535	0.10422	0.092511
546	546	0.153016	0.238038	0.0687632	0.0522553	0.0903264	0.0858427	0.062445	0.0976616	0.166763	0.101104	0.0871541	0.0730159	0.109023	0.0887574
547	547	0.218945	0.250888	0.106069	0.0466412	0.0903943	0.0811167	0.0846561	0.0910592	0.158545	0.07379	0.0413958	0.0589105	0.0825422	0.0983568
548	548	0.259889	0.21793	0.0931079	0.0454412	0.080409	0.0930129	0.0683941	0.0999121	0.0796312	0.0431479	0.0446052	0.0623037	0.103324	0.081558
549	549	0.239717	0.199158	0.0679162	0.0603394	0.102208	0.0830796	0.111245	0.0987581	0.108937	0.0648083	0.0591664	0.0829045	0.120064	0.0713252
550	550	0.141438	0.203075	0.0669765	0.0541254	0.103139	0.0864735	0.0748848	0.104773	0.12435	0.123244	0.0688823	0.0716529	0.118117	0.0946259
551	551	0.166249	0.206607	0.0855386	0.0511204	0.0898107	0.0757936	0.124384	0.0793651	0.0907733	0.0776762	0.0912511	0.0709141	0.105336	0.0819475
552	552	0.213235	0.20973	0.0888158	0.0383276	0.103736	0.0749622	0.107825	0.0989609	0.142568	0.0579809	0.0835927	0.0623533	0.137395	0.0721649
553	553	0.126034	0.220679	0.0868853	0.0416069	0.0963678	0.0719216	0.0887978	0.0855037	0.11509	0.0344828	0.0575107	0.0582983	0.060779	0.0766829
554	554	0.121528	0.214054	0.134204	0.0450581	0.0839338	0.102251	0.0786517	0.17036	0.0919037	0.105036	0.0896955	0.0618201	0.048516	0.0858597
555	555	0.101606	0.229701	0.123338	0.0593375	0.0974359	0.138431	0.0961022	0.203933	0.141502	-0.008793	0.10752	0.0648596	0.0520548	0.0961269
556	556	0.111025	0.28848	0.111711	0.0266924	0.0932366	0.175745	0.104947	0.173142	0.0918997	-0.0356112	0.077702	0.0606546	0.0423237	0.0900985
557	557	0.125452	0.298468	0.121289	0.0479705	0.0813728	0.206637	0.12963	0.157999	0.106367	0.0120312	-0.0296496	0.0711897	0.0496098	0.0967303
558	558	0.146387	0.330383	0.102833	0.0372513	0.0911942	0.225605	0.111278	0.21573	0.162992	-0.0102459	-0.0548926	0.0660793	0.0793113	0.0766787
559	559	0.165831	0.24149	0.120074	0.0740624	0.09375	0.202366	0.0933148	0.246616	0.0890355	0.024855	0.00818927	0.0694807	0.069497	0.0756972
560	560	0.150454	0.242459	0.0430088	0.0819574	0.092832	0.200494	0.103818	0.224886	0.0928668	0.00722023	-0.00837779	0.0694897	0.0662514	0.0946282
561	561	0.18552	0.245083	0.115865	0.0842616	0.0923432	0.199706	0.106178	0.213449	0.0966144	0.0387541	0.0345963	0.0711905	0.0934947	0.0857805
562	562	0.216063	0.276792	0.0747265	0.0728929	0.0792789	0.219451	0.136434	0.237144	0.1161	0.021166	0.03751	0.0598549	0.0557895	0.106374
563	563	0.228099	0.300894	0.0777221	0.0737798	0.0818094	0.218563	0.0589452	0.246168	0.0636682	0.00152674	0.0363924	0.0460787	0.0754623	0.101961
564	564	0.210741	0.336489	0.100484	0.0942895	0.0836251	0.17427	0.0167224	0.196927	0.0232414	0.000690091	0.109737	0.0656184	0.0574506	0.106557
565	565	0.195383	0.284334	0.0943669	0.0750462	0.0859106	0.131519	0.0865052	0.17567	0.0732845	0.0062756	0.0969938	0.078155	0.0443846	0.088356
566	566	0.197896	0.250668	0.0828615	0.0852994	0.0951533	0.109926	0.036855	0.166485	0.0999355	0.0151223	0.0744985	0.0676249	0.0404041	0.110011
567	567	0.192506	0.282396	0.0780739	0.0727593	0.104187	0.102439	0.153771	0.189258	0.0893669	0.0347947	0.0752997	0.0488246	0.0479541	0.0966616
568	568	0.198262	0.282086	0.0998256	0.0735441	0.103239	0.099978	0.134875	0.252149	0.0813732	0.0730499	0.096722	0.0426651	0.0616883	0.081761
569	569	0.207119	0.329387	0.0465252	0.0729669	0.104	0.0869381	0.148624	0.233169	0.0964674	0.126695	0.036916	0.0437808	0.0587968	0.10307
570	570	0.194301	0.288372	0.0734365	0.0668863	0.102128	0.0720925	0.130751	0.233253	0.0779553	0.142191	0.0706018	0.0650667	0.0528893	0.0907229
571	571	0.177016	0.260935	0.0801753	0.0681234	0.0979592	0.0772709	0.124604	0.239386	0.0429293	0.123039	0.0623413	0.0744222	0.0600109	0.0859189
572	572	0.178672	0.219171	0.068846	0.0494204	0.0975849	0.0658028	0.130336	0.173098	0.121473	0.0450451	0.0796686	0.0637007	0.0721591	0.0776177
573	573	0.204714	0.239669	0.0695263	0.0439561	0.0946664	0.0670659	0.0682547	0.228674	0.144424	0.0486487	0.0720325	0.0668104	0.0635581	0.0985222
574	574	0.215599	0.249005	0.0580709	0.0661564	0.100748	0.0839319	0.0807454	0.202802	0.124011	0.089838	0.0913013	0.0677429	0.0752441	0.0948297
575	575	0.177971	0.248129	0.0666211	0.0287141	0.0898075	0.0992172	-0.0545455	0.174449	0.154592	0.00334946	0.11151	0.070655	0.0890293	0.0970239
576	576	0.15928	0.226314	0.067283	0.0634995	0.103486	0.134785	0.0930931	0.15768	0.14257	0.00646633	0.0732965	0.071252	0.0881558	0.100066
577	577	0.203138	0.222445	0.0292599	0.0330673	0.102078	0.132315	0.15978	0.207677	0.111979	0.0204554	0.0657936	0.0739825	0.0969219	0.0936621
578	578	0.227496	0.222749	0.0882724	0.047984	0.101787	0.115023	0.167328	0.18606	0.0841975	0.00742059	0.0617761	0.0560304	0.0964467	0.0931323
579	579	0.316904	0.246761	0.0854462	0.042042	0.0966485	0.0955649	0.105263	0.133034	0.128536	0.0531476	0.0844112	0.0686391	0.0849036	0.0791059
580	580	0.249033	0.244922	0.0902369	0.0692789	0.0941876	0.0981251	0.0540243	0.136462	0.162362	0.0814972	0.0708846	0.0709047	0.0889299	0.0843276
581	581	0.255535	0.186905	0.0823401	0.0574205	0.100247	0.102073	0.0132392	0.167232	0.15015	0.103986	0.0645616	0.080948	0.0834801	0.0823624
582	582	0.226259	0.204276	0.0896125	0.0511015	0.0947616	0.0907656	0.0151007	0.132602	0.182357	0.0753614	0.0634561	0.077743	0.0806668	0.0986248
583	583	0.183605	0.190853	0.0950134	0.0540722	0.101132	0.0747923	0.0527598	0.124781	0.150206	0.0300798	0.0829793	0.0699187	0.0704352	0.090982
584	584	0.167099	0.200114	0.0791021	0.0447761	0.0955924	0.0783342	0.0595825	0.155362	0.217546	0.0516288	0.0853122	0.0782065	0.0673953	0.0885439
585	585	0.141796	0.199192	0.0758258	0.0623256	0.0889952	0.0932778	0.0788712	0.126847	0.205082	0.0573211	0.0944605	0.0645276	0.0772216	0.0812893
586	586	0.18944	0.192761	0.0920656	0.0446857	0.0798509	0.0855117	0.0909771	0.130854	0.143987	0.0510419	0.0690449	0.0570888	0.0622407	0.0842521
587	587	0.251565	0.187482	0.0925049	0.0526316	0.0850855	0.0736888	0.106789	0.161234	0.155706	0.0602334	0.106684	0.0822544	0.092448	0.0987254
588	588	0.242821	0.190139	0.0894979	0.0622103	0.0883558	0.0737813	0.0967985	0.118684	0.187675	0.0450287	0.14431	0.0809833	0.150027	0.0949649
589	589	0.188938	0.231116	0.0859335	0.0534823	0.0933333	0.0808324	0.0604782	0.126443	0.178958	0.0515956	0.144649	0.0837226	0.187179	0.10046
590	590	0.191773	0.232854	0.0966792	0.0503038	0.094981	0.0689362	0.0385135	0.101174	0.159162	0.0631579	0.176082	0.0787107	0.11817	0.094544
591	591	0.130552	0.202515	0.0757082	0.0564414	0.110933	0.0766871	0.0180862	0.0919732	0.146871	0.0539624	0.128401	0.0736152	0.104613	0.0771134
592	592	0.15308	0.235491	0.101723	0.0557308	0.107166	0.109877	0.0566037	0.115877	0.118264	0.064723	0.0760185	0.0920798	0.105372	0.0949967
593	593	0.241022	0.247426	0.0762615	0.0584958	0.097797	0.0975499	0.0884686	0.116292	0.116402	0.0759708	0.0631696	0.0942318	0.0921075	0.082257
594	594	0.273088	0.236283	0.0955166	0.0558086	0.0937074	0.0825243	0.0818049	0.0971365	0.117135	0.0765958	0.089309	0.0827716	0.108093	0.0888291
595	595	0.24082	0.23812	0.0964933	0.0383315	0.0889789	0.0876566	0.043711	0.10139	0.138647	0.0726418	0.0787259	0.06204	0.0836551	0.0784062
596	596	0.226524	0.242788	0.0770438	0.0526316	0.0928683	0.0850453	0.0856638	0.0860248	0.101614	0.0322581	0.0771549	0.0679045	0.0699677	0.0777661
597	597	0.127678	0.239301	0.0776568	0.0556258	0.0988533	0.0910702	0.119434	0.095754	0.110587	0.0525996	0.0651466	0.0747485	0.0615668	0.0839266
598	598	0.14064	0.194596	0.108144	0.0544375	0.0826858	0.0864089	0.167051	0.0909554	0.112235	0.050815	0.087439	0.0784632	0.0748213	0.0819672
599	599	0.149258	0.214329	0.110056	0.040162	0.087791	0.0855509	0.0936776	0.0753555	0.146732	0.0681899	0.079665	0.0852629	0.0895748	0.105005
600	600	0.188217	0.25509	0.122721	0.0669594	0.0948633	0.0810333	0.109072	0.0442478	0.122222	0.0642202	0.110952	0.0653159	0.060181	0.0934354
601	601	0.109875	0.208206	0.112971	0.0595729	0.078481	0.105116	0.110345	0.121798	0.089541	0.0691589	0.0893235	0.0578811	0.0659667	0.0818291
602	602	0.106721	0.208766	0.102825	0.0710082	0.0937367	0.156682	0.115385	0.216164	0.0977389	-0.0271966	0.0734164	0.056104	0.0758197	0.0832976
603	603	0.139266	0.261337	0.125438	0.0425768	0.0923395	0.170356	0.110671	0.248047	0.101855	-0.0652385	0.116424	0.0682408	0.0569431	0.0915597
604	604	0.14523	0.316632	0.127446	0.043212	0.0707796	0.220882	0.101966	0.207547	0.0781032	-0.0138585	0.048478	0.0745755	0.0527733	0.0907976
605	605	0.164384	0.356522	0.116334	0.0432961	0.0859017	0.240823	0.0892153	0.199216	0.125331	-0.00796599	-0.018226	0.0747852	0.0561798	0.0864351
606	606	0.177768	0.212389	0.118342	0.0673286	0.0878563	0.207342	0.0968165	0.247482	0.144317	0.0212931	-0.0111607	0.0726608	0.0658271	0.0880165
607	607	0.187181	0.244169	0.0530909	0.0787172	0.0912059	0.207528	0.107326	0.264438	0.146259	0.0115023	0.020979	0.0709894	0.0597729	0.0890452
608	608	0.172721	0.239386	0.130923	0.0730713	0.0986763	0.207074	0.0986487	0.233521	0.0892283	0.0137881	0.0888283	0.0652786	0.053641	0.0922465
609	609	0.208188	0.281083	0.0961161	0.0717732	0.0961161	0.200098	0.145406	0.221083	0.12393	0.00542494	0.0740446	0.0606607	0.0759055	0.0967869
610	610	0.219591	0.2782	0.0873709	0.0646042	0.0897289	0.196312	0.0604333	0.27178	0.0914128	0.0223097	0.0743741	0.0458115	0.0815169	0.10349
611	611	0.221717	0.309091	0.118095	0.0660409	0.0853566	0.160229	0.0568319	0.234375	0.0565291	0.0073126	0.0291126	0.0482357	0.0969803	0.0986395
612	612	0.230677	0.274009	0.0639935	0.0621469	0.0908753	0.128114	0.0394036	0.2	0.0226116	0.0201157	0.0296273	0.0580728	0.0579307	0.109753
613	613	0.217231	0.237646	0.0688039	0.0567747	0.0955924	0.108271	0.0861723	0.177419	0.0671506	0.0287951	0.0673444	0.05	0.035174	0.0734392
614	614	0.239891	0.246124	0.0804696	0.0483559	0.104405	0.0888363	0.119665	0.178175	0.0967941	0.0407434	0.060852	0.0491716	0.0551053	0.131819
615	615	0.221678	0.25274	0.0792179	0.0682353	0.083805	0.0777356	0.0961039	0.214043	0.14699	0.0354978	0.0623359	0.0460546	0.0734795	0.0768893
616	616	0.220129	0.227599	0.069708	0.0870712	0.0954198	0.073321	0.14302	0.220294	0.147838	0.0835401	0.0808704	0.057204	0.08143	0.086758
617	617	0.216948	0.229129	0.0883543	0.0787572	0.0919702	0.0685096	0.0780198	0.201767	0.144692	0.155811	0.0695374	0.0678756	0.0764393	0.101322
618	618	0.226984	0.259376	0.0556448	0.0651757	0.101656	0.0658345	0.0893788	0.212766	0.114137	0.177871	0.0397959	0.0692081	0.0585418	0.0865445
619	619	0.205352	0.24658	0.0712489	0.0504253	0.0862963	0.0527363	0.109482	0.0767408	0.0966266	0.0918131	0.0589452	0.0721745	0.0552913	0.0838684
620	620	0.196855	0.260536	0.0811808	0.0661502	0.0946802	0.0557532	0.0643357	0.0954516	0.159658	0.0183522	0.0417207	0.0728413	0.0586227	0.0893843
621	621	0.216111	0.24828	0.0548682	0.0616921	0.0997305	0.0837782	0.0203528	0.119543	0.145279	0.0523771	0.0433873	0.0671569	0.0700742	0.105197
622	622	0.211848	0.230995	0.0944742	0.0600343	0.0836473	0.11517	-0.0294494	0.127387	0.116755	0.0267335	0.0507448	0.0843882	0.0780886	0.111841
623	623	0.166756	0.210767	0.0628707	0.0674712	0.107519	0.142994	0.101976	0.175563	0.123181	-0.0364609	0.0697318	0.0797134	0.0639033	0.0949352
624	624	0.152792	0.257181	0.0753676	0.0339397	0.0995154	0.131376	0.129071	0.172414	0.143551	0.0516659	0.0606586	0.0728964	0.0597056	0.114195
625	625	0.189066	0.266345	0.106079	0.0566327	0.0970611	0.10906	0.155983	0.164572	0.145002	0.00329836	0.052853	0.0667195	0.0449714	0.121164
626	626	0.199746	0.232202	0.0835378	0.0456686	0.093552	0.116171	0.129661	0.157593	0.135301	0.056021	0.0562841	0.0926309	0.0763359	0.0875958
627	627	0.257993	0.211783	0.0907668	0.0583285	0.100554	0.104268	0.128005	0.154707	0.153916	0.0611273	0.0556526	0.0812785	0.0887574	0.0789898
628	628	0.267071	0.239087	0.0997587	0.0546716	0.0924464	0.0951157	0.0493274	0.143937	0.107957	0.110472	0.0425698	0.0961194	0.0912034	0.0915166
629	629	0.244713	0.231821	0.0863637	0.0564911	0.0911565	0.0932922	0.0211964	0.145879	0.162055	0.0828829	0.0409483	0.083695	0.088433	0.0875982
630	630	0.221083	0.217391	0.127268	0.0488261	0.109309	0.0831943	0.0376203	0.159784	0.157219	0.04245	0.0512033	0.0831169	0.0778956	0.087187
631	631	0.169339	0.207558	0.101371	0.0519318	0.0871985	0.0704292	0.0681547	0.153777	0.171875	0.0566588	0.0476671	0.0690141	0.0705261	0.0894279
632	632	0.16413	0.236229	0.0819283	0.0373214	0.0868095	0.0955382	0.0972734	0.152278	0.176115	0.0684195	0.0618238	0.0641162	0.0673752	0.0790861
633	633	0.176692	0.2323	0.0956582	0.0603131	0.0913928	0.0965	0.100188	0.117374	0.162669	0.0529576	0.0594595	0.0902857	0.0901654	0.0823103
634	634	0.215654	0.226277	0.0930871	0.0442185	0.101905	0.0924933	0.140899	0.11446	0.14195	0.0405788	0.0756207	0.102667	0.0933724	0.0885702
635	635	0.271771	0.208574	0.107527	0.0572929	0.0958484	0.0901137	0.127949	0.130513	0.15079	0.0467679	0.058671	0.0866735	0.112559	0.0942538
636	636	0.223131	0.225495	0.0950607	0.0411354	0.100437	0.0909498	0.0551287	0.122966	0.156929	0.0592417	0.105336	0.0716577	0.156853	0.0930992
637	637	0.17991	0.245875	0.0984308	0.0633359	0.113536	0.0880142	0.0376541	0.13153	0.154321	0.0535606	0.14688	0.0718192	0.136778	0.0959296
638	638	0.177337	0.231641	0.103514	0.0706649	0.089603	0.074011	0.0328141	0.114694	0.127043	0.0562745	0.125926	0.0744986	0.114717	0.0790068
639	639	0.149847	0.211838	0.0697557	0.0644365	0.0922078	0.0790097	0.0759248	0.125364	0.126912	0.0496894	0.100497	0.0813008	0.126957	0.0913299
640	640	0.177772	0.255616	0.11975	0.0612245	0.107031	0.0898393	0.0950452	0.13006	0.147793	0.0785111	0.0943789	0.104595	0.087387	0.0977606
641	641	0.266093	0.214205	0.0769231	0.0537572	0.0870406	0.0958655	0.0696146	0.143271	0.15647	0.022871	0.123328	0.0961428	0.0817844	0.0818082
642	642	0.250604	0.254005	0.109814	0.040306	0.0901687	0.08278	0.0488916	0.116307	0.0954199	0.0199488	0.0918128	0.0844846	0.0724985	0.0973202
643	643	0.240675	0.248195	0.08666	0.0520833	0.0899429	0.0838768	0.102192	0.152322	0.122206	0.000456837	0.1104	0.0700104	0.054626	0.0973036
644	644	0.223519	0.225458	0.0762895	0.0360497	0.0896199	0.090388	0.146509	0.123867	0.125514	0.0602706	0.0944685	0.0651686	0.0747018	0.0990911
645	645	0.123014	0.213455	0.0742475	0.0484887	0.0874056	0.0735707	0.112419	0.0810093	0.139798	0.0298463	0.108549	0.0688801	0.0637492	0.0669816
646	646	0.137162	0.191077	0.139602	0.0601351	0.0904635	0.0757168	0.0862291	0.0677388	0.163163	0.039807	0.0831919	0.0765876	0.0598291	0.0851581
647	647	0.167481	0.194444	0.119217	0.0639535	0.0821035	0.0832587	0.120146	0.0632169	0.0941132	0.0707002	0.125218	0.0702207	0.071753	0.113727
648	648	0.165346	0.207845	0.0721481	0.060241	0.0728197	0.0863167	0.112948	0.0866667	0.10428	0.0682696	0.169587	0.0621343	0.0569651	0.0859599
649	649	0.129179	0.183577	0.152295	0.0669711	0.0898028	0.0933763	0.110902	0.211009	0.0979228	0.027027	0.106641	0.065445	0.0635155	0.0844116
650	650	0.134012	0.173971	0.113847	0.0495388	0.0944479	0.144999	0.089542	0.251306	0.0819101	0.0343612	0.0637838	0.0682523	0.0645575	0.0833674
651	651	0.148795	0.251465	0.115158	0.046953	0.0785729	0.173529	0.0851599	0.252735	0.105907	0.0124138	0.0909569	0.0703851	0.0540732	0.0921986
652	652	0.17089	0.298102	0.12453	0.0320335	0.0852284	0.22764	0.077027	0.234519	0.124777	-0.0234688	0.0729443	0.0787335	0.0645406	0.0767544
653	653	0.175966	0.262812	0.119157	0.0723115	0.0926906	0.240136	0.0917812	0.270655	0.133634	0.00648648	0.0847458	0.0850695	0.0721925	0.0944936
654	654	0.190285	0.209102	0.100251	0.0785435	0.10002	0.229123	0.128222	0.267829	0.132153	-0.00781252	0.12579	0.0778781	0.0728734	0.101995
655	655	0.193146	0.23834	0.0912752	0.0835596	0.0961968	0.205756	0.102662	0.221274	0.136649	0.0435816	0.136929	0.0509536	0.0665908	0.0967464
656	656	0.20193	0.230186	0.103618	0.0700976	0.10438	0.190985	0.123159	0.219887	0.0757813	0.040252	0.0533736	0.0502225	0.0690383	0.0918919
657	657	0.233415	0.237039	0.107165	0.0697531	0.0986145	0.176033	0.155673	0.219722	0.0842807	0.0468432	0.0322103	0.0548523	0.0774193	0.0998343
658	658	0.248337	0.235961	0.0939936	0.0751485	0.0933019	0.170423	0.090065	0.289981	0.0849448	0.0320189	0.0566839	0.0435865	0.100437	0.0861254
659	659	0.25276	0.261261	0.0887552	0.0687907	0.0804942	0.157527	0.105494	0.251412	0.0822958	0.0461939	0.0807765	0.046806	0.108047	0.0965415
660	660	0.254806	0.227549	0.0773305	0.0695109	0.083565	0.135027	0.0582121	0.255493	0.0108758	0.0300231	0.067503	0.0359955	0.0680272	0.0954093
661	661	0.23758	0.243355	0.0881397	0.0702899	0.0943182	0.112828	0.0620087	0.182677	0.0326518	0.0437909	0.0619916	0.0338083	0.0586451	0.0919614
662	662	0.242232	0.233552	0.0829834	0.061826	0.0975789	0.0945188	0.117573	0.13929	0.0875	0.0469006	0.0621221	0.0416918	0.0915734	0.105556
663	663	0.247628	0.256173	0.0763758	0.0478245	0.0909753	0.0899603	0.0524087	0.169717	0.201199	0.0465523	0.067757	0.0633342	0.115011	0.0663083
664	664	0.234279	0.220307	0.115836	0.0438163	0.0918423	0.0851906	0.0635722	0.144509	0.187955	0.0413976	0.0589595	0.0721287	0.102149	0.0852679
665	665	0.227904	0.237713	0.0768926	0.0575362	0.0874007	0.0630002	0.0677016	0.142857	0.236007	0.0762914	0.0728516	0.057245	0.0901366	0.0954304
666	666	0.233018	0.242678	0.0616823	0.054808	0.0941588	0.0603811	0.0755988	0.183583	0.25365	0.14402	0.0649351	0.0841688	0.0661384	0.0923324
667	667	0.248248	0.226395	0.077185	0.0620934	0.0875979	0.0583565	0.0726207	0.0840734	0.112869	0.151355	0.0625	0.0728565	0.0651791	0.093738
668	668	0.234903	0.253559	0.0766252	0.0763425	0.0939417	0.0644458	0.034325	0.0769718	0.135737	0.113959	0.065645	0.0769578	0.0566449	0.0957552
669	669	0.232317	0.238066	0.0510992	0.0772418	0.104739	0.0839002	0.042362	0.0599938	0.171617	0.0273182	0.035652	0.0797266	0.057979	0.0898899
670	670	0.212173	0.236408	0.0920013	0.0744775	0.107279	0.115285	-0.0161527	0.0931264	0.139442	-0.0129406	0.0515306	0.0793238	0.0695991	0.100871
671	671	0.168551	0.247974	0.0457269	0.0881494	0.103765	0.14852	0.0251046	0.141802	0.168432	0.0105062	0.0590842	0.0716981	0.059952	0.101748
672	672	0.171421	0.270745	0.0689076	0.0685004	0.0910802	0.137157	0.147826	0.157483	0.138711	-0.0229008	0.0583888	0.0678544	0.0692348	0.116269
673	673	0.186328	0.232173	0.0921232	0.04204	0.0972587	0.113725	0.1309	0.140486	0.126452	0.051458	0.0541353	0.0761868	0.0819096	0.0906649
674	674	0.222809	0.228884	0.101108	0.0464558	0.0996119	0.113848	0.148033	0.130251	0.124337	-0.00110556	0.0686785	0.0883634	0.0622332	0.0992273
675	675	0.279168	0.223522	0.0998577	0.0516529	0.099624	0.103754	0.169811	0.129727	0.140432	0.091395	0.064588	0.092081	0.0754873	0.0874578
676	676	0.264144	0.24507	0.0893444	0.041675	0.108268	0.083918	0.169983	0.13814	0.0841874	0.0537634	0.0675068	0.102362	0.0951868	0.0844967
677	677	0.238376	0.267987	0.112153	0.0578607	0.0881688	0.0834156	0.0784683	0.138058	0.123356	0.0659155	0.0657658	0.10394	0.0926812	0.0712549
678	678	0.176471	0.252798	0.112593	0.0366531	0.0925274	0.075363	0.066504	0.191467	0.155691	0.0495469	0.096304	0.0860395	0.0854071	0.0756147
679	679	0.159096	0.301742	0.0930635	0.0340246	0.100074	0.0731593	0.0450024	0.214326	0.167077	0.0360577	0.0463271	0.0903491	0.0804062	0.091731
680	680	0.131798	0.256677	0.094202	0.0457054	0.0995362	0.0828206	0.0588697	0.225847	0.195219	0.031085	0.067723	0.0722022	0.0877373	0.078134
681	681	0.215584	0.243677	0.102567	0.0614872	0.0880114	0.0719626	0.0824238	0.195162	0.172479	0.0710149	0.0896515	0.0776942	0.0888689	0.0963685
682	682	0.273	0.271243	0.0845035	0.0305029	0.10513	0.0839895	0.12208	0.124618	0.143132	0.0455097	0.0862724	0.0869894	0.0833842	0.100813
683	683	0.321532	0.239161	0.0850085	0.0653403	0.0998945	0.092788	0.13408	0.186572	0.163735	0.0511084	0.0465738	0.11126	0.125242	0.0874306
684	684	0.197494	0.234124	0.0907729	0.0388206	0.105728	0.0973132	0.0732375	0.188416	0.119231	0.0424757	0.0607109	0.0773809	0.1348	0.0871795
685	685	0.157681	0.222312	0.107497	0.0635331	0.118834	0.100269	0.0301351	0.152496	0.147862	0.0533491	0.0531534	0.0806401	0.0943801	0.0852681
686	686	0.156763	0.22328	0.0965082	0.045215	0.100875	0.0729012	0.0358066	0.165984	0.082423	0.0440328	0.0953437	0.0695322	0.0691244	0.0977475
687	687	0.147161	0.209985	0.077104	0.0650407	0.09121	0.0753468	0.0254545	0.159194	0.259009	0.0594269	0.058858	0.0841362	0.101599	0.0903454
688	688	0.190795	0.205459	0.111895	0.0713471	0.100498	0.0790575	0.0208257	0.134365	0.178857	0.0476476	0.0765306	0.0802656	0.0814967	0.113902
689	689	0.268611	0.248671	0.0861257	0.0586861	0.0988813	0.0902085	0.0503392	0.152648	0.150327	0.126611	0.084316	0.0923577	0.0576822	0.0982896
690	690	0.214454	0.205389	0.11399	0.0575693	0.105033	0.0902527	0.0683614	0.150538	0.0770962	0.0148662	0.0891767	0.0846176	0.103288	0.0897317
691	691	0.249646	0.276442	0.0703625	0.0437406	0.0838761	0.0864586	0.0767169	0.160138	0.118752	0.0612589	0.138059	0.104192	0.0934325	0.1062
692	692	0.261438	0.232262	0.0858479	0.0330578	0.0890493	0.0779278	0.0940114	0.121429	0.140557	0	0.0905669	0.0774546	0.0817236	0.0863436
693	693	0.130489	0.226065	0.107015	0.051984	0.0916836	0.0766898	0.106571	0.0866067	0.137267	0.064701	0.15319	0.0855571	0.0748337	0.0831191
694	694	0.141151	0.185696	0.136857	0.0654762	0.0865562	0.0829636	0.0629556	0.0643504	0.133913	0.0318021	0.162947	0.070585	0.0864992	0.0880146
695	695	0.150202	0.193539	0.103724	0.0284685	0.0798722	0.0853848	0.0676359	0.055256	0.11879	0.0573248	0.114277	0.0677537	0.10741	0.120863
696	696	0.185065	0.167644	0.0794303	0.0562771	0.0824742	0.0854403	0.115315	0.122274	0.0823245	0.0674723	0.112701	0.0902031	0.0565623	0.0847018
697	697	0.128603	0.177285	0.134388	0.0490158	0.0916108	0.0953567	0.155211	0.20684	0.0963665	0.0238806	0.140014	0.0808982	0.0642437	0.0804947
698	698	0.11745	0.189312	0.0926012	0.033892	0.0949079	0.142223	0.143526	0.245213	0.135115	-0.0263692	0.154222	0.0711521	0.07478	0.0932773
699	699	0.145477	0.217391	0.124656	0.0358423	0.0823916	0.191086	0.108731	0.277108	0.0986214	0.0201766	0.0663329	0.0657583	0.0828572	0.0917794
700	700	0.183627	0.267987	0.121096	0.0339407	0.0882353	0.219067	0.0971164	0.276345	0.117708	0.0460289	0.0860444	0.0750751	0.0788923	0.10199
701	701	0.193685	0.307506	0.078378	0.04298	0.0888438	0.225145	0.095057	0.316456	0.168191	0.032368	0.0703226	0.0961145	0.0630358	0.157603
702	702	0.216929	0.294568	0.101251	0.0817844	0.0938499	0.223245	0.0841475	0.253618	0.171625	0.0268886	0.0712475	0.0962018	0.0648559	0.115335
703	703	0.236884	0.269713	0.0595643	0.0772904	0.106895	0.185149	0.113811	0.217839	0.123441	0.00752545	0.0661914	0.0701313	0.0621208	0.108461
704	704	0.201573	0.292383	0.0940047	0.0842201	0.0963332	0.171103	0.105054	0.217674	0.14429	0.0412272	0.0760522	0.0386417	0.0677913	0.0938957
705	705	0.241519	0.248276	0.0945333	0.0709914	0.103704	0.200984	0.123941	0.254771	0.0817477	0.0135747	0.0769231	0.0359889	0.0651117	0.104451
706	706	0.259925	0.227189	0.0874704	0.0831746	0.101801	0.178284	0.150794	0.285324	0.0408401	0.0641534	0.0522668	0.048986	0.0736703	0.0849303
707	707	0.265183	0.24775	0.0847343	0.103237	0.0947577	0.1586	0.0956522	0.26943	0.0559937	0.0417218	0.0904925	0.0576352	0.0876289	0.0972729
708	708	0.279749	0.256402	0.0961012	0.089694	0.0865199	0.13031	0.0544136	0.309009	0.0867294	0.0706402	0.0835563	0.0569948	0.0819277	0.103765
709	709	0.282825	0.242221	0.0943526	0.0835715	0.0961274	0.136051	0.0319091	0.238012	0.00578387	0.0710784	0.0630422	0.0393974	0.100775	0.0866009
710	710	0.275203	0.229087	0.0896422	0.0790798	0.101205	0.102119	0.0587678	0.198689	0.0589988	0.0875394	0.0577778	0.0252339	0.093861	0.0977347
711	711	0.269659	0.224592	0.0912924	0.0716273	0.0911444	0.0842581	0.084787	0.157895	0.0545663	0.064915	0.0663172	0.054123	0.0939334	0.109139
712	712	0.25785	0.278765	0.103875	0.0572952	0.097597	0.073444	0.0708427	0.149612	0.120273	0.0583732	0.0648446	0.0590129	0.113175	0.0753187
713	713	0.23984	0.244194	0.0720669	0.0522918	0.0903132	0.067601	0.0960027	0.165531	0.149788	0.0453515	0.0980392	0.0786247	0.110366	0.0909494
714	714	0.22692	0.252713	0.0670843	0.0587472	0.0943897	0.0642129	0.0510466	0.153461	0.187575	0.0680255	0.102456	0.0764693	0.0657568	0.104904
715	715	0.246113	0.260274	0.0848577	0.0624796	0.0989593	0.0527359	0.0578035	0.118851	0.227368	0.0973597	0.0735981	0.0870062	0.0542251	0.0859802
716	716	0.261128	0.255356	0.0695021	0.0463422	0.0939013	0.0626111	-0.0244755	0.11959	0.139803	0.063172	0.06727	0.0748006	0.0642352	0.099921
717	717	0.255483	0.229471	0.0883392	0.043956	0.0911981	0.0817738	-0.0659341	0.108396	0.165969	0.0658643	0.0911633	0.0703806	0.0685307	0.079281
718	718	0.245619	0.218675	0.0585656	0.0637149	0.0921181	0.115699	-0.0810811	0.06688	0.131152	0.0792079	0.0546977	0.0732691	0.0714474	0.0845098
719	719	0.183121	0.230102	0.0569878	0.0684618	0.0913745	0.149232	0.0136987	0.0736715	0.118337	0.00548755	0.0580744	0.070609	0.0661013	0.0849782
720	720	0.184461	0.265306	0.0511037	0.0661017	0.0917819	0.145879	0.026738	0.10694	0.136069	-0.0210046	0.037092	0.0696958	0.0587349	0.0953576
721	721	0.298278	0.238592	0.0443914	0.0555698	0.0962963	0.120523	0.161652	0.110853	0.129755	0.00547448	0.0516177	0.0731522	0.0614397	0.0944162
722	722	0.358451	0.21468	0.0921129	0.0543627	0.0897703	0.116265	0.154559	0.139409	0.129666	0.00525677	0.0676884	0.0681238	0.0638762	0.0919821
723	723	0.305238	0.21663	0.100597	0.0398731	0.0958545	0.113629	0.121474	0.127717	0.0980086	0.00598153	0.0616785	0.0902643	0.0830861	0.0930943
724	724	0.256751	0.221022	0.093196	0.0411079	0.0954184	0.0936892	0.161254	0.146853	0.117479	0.0870477	0.0481308	0.104605	0.0852743	0.0850811
725	725	0.244945	0.227103	0.0947504	0.0361248	0.103589	0.0701412	0.141434	0.190584	0.100588	0.0503029	0.0690925	0.103378	0.08636	0.0910524
726	726	0.208735	0.238001	0.115809	0.0506115	0.101235	0.0699074	0.0904311	0.177146	0.132482	0.0714072	0.0724575	0.110495	0.0848062	0.0880516
727	727	0.212239	0.257738	0.0932813	0.0461152	0.109309	0.0840415	0.107896	0.162349	0.170553	0.0474164	0.0845693	0.0919658	0.0733813	0.0898079
728	728	0.226936	0.261986	0.106983	0.0413625	0.0986267	0.069096	0.0494938	0.205489	0.197535	0.0407351	0.0708137	0.0760681	0.0698842	0.0904045
729	729	0.255639	0.263712	0.0632974	0.0495132	0.107401	0.0717238	0.00972672	0.217176	0.191119	0.0246542	0.0947485	0.0771429	0.0958628	0.075643
730	730	0.275974	0.245161	0.0731707	0.0518987	0.0921318	0.0957854	0.0764201	0.216743	0.160872	0.0574572	0.0814732	0.0921886	0.0990462	0.103545
731	731	0.319971	0.279049	0.0716529	0.0143187	0.0996274	0.0953338	0.111195	0.197244	0.115434	0.0356718	0.0786261	0.0874576	0.0967859	0.108267
732	732	0.213543	0.246568	0.0706003	0.0627219	0.0822004	0.0959641	0.0857357	0.245987	0.136691	0.055474	0.0607462	0.0873549	0.0750104	0.105691
733	733	0.16524	0.282185	0.0724704	0.0330033	0.0947964	0.0927374	0.034131	0.23453	0.124606	0.0568621	0.0701647	0.0714086	0.085832	0.0962166
734	734	0.183905	0.281799	0.0769049	0.0456554	0.0790473	0.10154	0.040296	0.196295	0.167675	0.0526316	0.0331754	0.0767507	0.105249	0.101147
735	735	0.195876	0.270631	0.0820691	0.0618028	0.112645	0.0761575	0.0129005	0.172876	0.0705171	0.0486618	0.0890361	0.0848149	0.124183	0.0993013
736	736	0.232664	0.245624	0.0744568	0.0731411	0.109501	0.0782493	0.0357654	0.181783	0.194529	0.0493192	0.0738186	0.077062	0.134308	0.1
737	737	0.278283	0.21447	0.0869503	0.0706427	0.0890307	0.0846256	0.0115113	0.171946	0.133872	0.0497682	0.104872	0.064449	0.152174	0.110054
738	738	0.271588	0.237651	0.102988	0.0626437	0.0714491	0.0914414	0.0263158	0.173684	0.107756	0.0969697	0.0857143	0.0824771	0.138056	0.106454
739	739	0.302209	0.248895	0.108224	0.0553706	0.0910516	0.100964	0.0283495	0.188471	0.0728095	-0.0618505	0.0638859	0.0631068	0.117227	0.117819
740	740	0.303889	0.267385	0.0770958	0.0535396	0.0832654	0.0943311	0.0372024	0.177506	0.129212	0.110186	0.127273	0.0757856	0.121481	0.119511
741	741	0.297852	0.228534	0.0923096	0.0451912	0.0867149	0.0918255	0.052592	0.126431	0.13792	-0.00038566	0.127238	0.0739758	0.132824	0.0735786
742	742	0.110346	0.229194	0.111082	0.0433728	0.0911317	0.0813293	0.027523	0.103052	0.14063	0.0421012	0.191713	0.0698211	0.116667	0.120135
743	743	0.160662	0.187346	0.133774	0.0488621	0.0812979	0.0820535	0.0521127	0.0638743	0.126849	0.0269663	0.145433	0.0761062	0.131439	0.0870423
744	744	0.165201	0.207709	0.134293	0.0296161	0.105723	0.0860611	0.0702144	0.041648	0.111242	0.0071372	0.114118	0.0648038	0.117647	0.0972511
745	745	0.109593	0.210814	0.0859296	0.037743	0.087026	0.0846006	0.110869	0.0936416	0.104703	-0.00866553	0.145166	0.0877301	0.0763075	0.0814425
746	746	0.152318	0.239383	0.137447	0.0359327	0.0932154	0.102775	0.14507	0.140781	0.0560065	0.00840333	0.143666	0.0742681	0.0460508	0.0810243
747	747	0.158693	0.310244	0.119839	0.0333726	0.0938399	0.132298	0.132282	0.221557	0.0835601	0.0339426	0.217534	0.0761235	0.045639	0.0885585
748	748	0.112463	0.313469	0.129351	0.0412913	0.090548	0.179059	0.12253	0.246819	0.125184	0.0271986	0.143874	0.0898638	0.0604674	0.0630149
749	749	0.131254	0.314768	0.113834	0.0428829	0.0984744	0.215023	0.0936948	0.238381	0.115507	0.0608696	0.0531646	0.0947012	0.0726151	0.0691392
750	750	0.192807	0.346394	0.08035	0.0436377	0.100039	0.213333	0.100739	0.277032	0.140507	0.065	0.0657288	0.0988121	0.0869768	0.0808585
751	751	0.215054	0.36143	0.110333	0.0790465	0.104414	0.242909	0.108911	0.275477	0.154316	0.0455724	0.0918061	0.0878447	0.0782927	0.0900329
752	752	0.231174	0.365343	0.0560517	0.0759493	0.102485	0.226823	0.120525	0.22211	0.112013	0.0395165	0.0800712	0.0572106	0.0617214	0.0688848
753	753	0.245974	0.40779	0.104334	0.0723251	0.10422	0.200954	0.118774	0.218667	0.0780192	0.0359188	0.0276923	0.0331961	0.054692	0.08981
754	754	0.233681	0.410115	0.066363	0.0855746	0.099767	0.228653	0.153041	0.26206	0.0415384	0.00121802	0.0475949	0.0412896	0.060692	0.100459
755	755	0.253172	0.364249	0.0872645	0.10078	0.0930091	0.2	0.0924709	0.255408	0.0447138	0.059764	0.0526849	0.0616439	0.0610465	0.0811408
756	756	0.262373	0.315343	0.0826833	0.0988875	0.0982889	0.164172	0.103533	0.258671	0.0795848	0.0481696	0.0540675	0.06407	0.0889987	0.100637
757	757	0.29408	0.245731	0.104411	0.0767303	0.0852774	0.144011	0.105926	0.331517	0.106888	0.0791308	0.0655653	0.0522727	0.126087	0.0884975
758	758	0.273994	0.245784	0.105731	0.065761	0.0971245	0.152609	0.106722	0.291353	0.0478485	0.0841453	0.0711899	0.042654	0.121053	0.0958904
759	759	0.293291	0.253004	0.0955026	0.0669089	0.103546	0.11155	0.0848427	0.269406	0.0687211	0.0973531	0.0892907	0.0339206	0.114343	0.103962
760	760	0.300032	0.256063	0.0837073	0.0745049	0.100736	0.0779327	0.0881301	0.259972	0.0505507	0.00243992	0.06512	0.0642153	0.0912548	0.0974505
761	761	0.293625	0.313671	0.0811485	0.0726643	0.102117	0.0761784	0.0904576	0.198444	0.0444951	0.0502458	0.0670127	0.0690101	0.0734463	0.106751
762	762	0.291059	0.288725	0.0668558	0.0860806	0.0957132	0.0722892	0.0843621	0.177117	0.0544959	0.0617535	0.0668865	0.0748268	0.0637402	0.100839
763	763	0.269927	0.293252	0.0695266	0.062445	0.0940301	0.0654917	0.0648982	0.123338	0.0683503	0.0487421	0.0379193	0.082898	0.0688657	0.110406
764	764	0.242333	0.292818	0.0766355	0.0470372	0.0988372	0.0471642	-0.0240741	0.134552	0.15118	0.0938322	0.0632694	0.0801669	0.0736329	0.0976821
765	765	0.248227	0.276204	0.0686368	0.0504433	0.105348	0.059221	-0.134815	0.139828	0.169134	0.0272578	0.0746055	0.0759267	0.0755456	0.0936699
766	766	0.26881	0.247222	0.0748663	0.0481676	0.101642	0.0904266	-0.0698365	0.153939	0.0941423	0.0606451	0.0999654	0.0764485	0.0748707	0.0811019
767	767	0.263289	0.226337	0.0520548	0.0516934	0.0868205	0.116883	-0.102526	0.0995204	0.0384181	0.118523	0.0323646	0.0804066	0.0805569	0.0950061
768	768	0.239931	0.234237	0.0623674	0.0565931	0.0879936	0.150588	0.0324254	0.0703612	0.082941	0.00855368	0.0655492	0.0779072	0.0762868	0.0952071
769	769	0.199481	0.27309	0.0663147	0.0624156	0.0892642	0.149769	0.0987461	0.0817166	0.149852	-0.0120689	0.0363236	0.0774371	0.0779392	0.0944084
770	770	0.245295	0.296456	0.0501705	0.0510701	0.0904503	0.126367	0.134503	0.0949624	0.177634	0.0430009	0.0629591	0.0727887	0.0704949	0.0754337
771	771	0.367515	0.252958	0.0944882	0.058375	0.0926956	0.111693	0.136287	0.140714	0.110579	-0.0620884	0.0788073	0.0757528	0.0578208	0.081571
772	772	0.371449	0.231496	0.121294	0.0445428	0.0905784	0.110844	0.0908114	0.124338	0.0713224	0.0554926	0.0945044	0.0981575	0.0837961	0.0919176
773	773	0.307313	0.250383	0.117647	0.0468451	0.106083	0.0940748	0.137543	0.131504	0.114089	0.0521625	0.0703183	0.099897	0.0892931	0.0950032
774	774	0.283327	0.249	0.107721	0.0472509	0.104592	0.0670444	0.134152	0.188112	0.127739	0.0596511	0.0848914	0.106546	0.0912367	0.0819332
775	775	0.24942	0.227946	0.0842906	0.0476575	0.107752	0.0633882	0.146249	0.209593	0.144216	0.0598656	0.119014	0.109104	0.0934664	0.0842889
776	776	0.207018	0.242708	0.110394	0.0456646	0.0976281	0.0704354	0.123084	0.20291	0.156185	0.0149072	0.110307	0.092271	0.0932767	0.106643
777	777	0.185851	0.236536	0.100411	0.046905	0.11959	0.0722469	0.102564	0.234234	0.180237	0.0295003	0.104041	0.0793544	0.0960873	0.118644
778	778	0.240418	0.220848	0.0562667	0.0534964	0.108248	0.0805556	0.0162272	0.265823	0.163801	0.043375	0.108162	0.0822892	0.0872653	0.0984414
779	779	0.285861	0.250941	0.0717285	0.0605848	0.112628	0.0794241	0.0564412	0.23322	0.1575	0.0365745	0.101889	0.0844241	0.0848063	0.14735
780	780	0.281109	0.263785	0.0386688	0.00851999	0.108392	0.103324	0.121693	0.18685	0.114882	0.0378347	0.127208	0.0692602	0.0818023	0.100268
781	781	0.27411	0.279077	0.100987	-0.00539086	0.106705	0.112027	0.0679887	0.166255	0.126321	0.0502924	0.0986842	0.0625531	0.118603	0.122112
782	782	0.217241	0.313894	0.0639563	0.0353554	0.119797	0.110441	0.0491651	0.14006	0.167256	0.0487733	0.0558643	0.0781028	0.110179	0.0821053
783	783	0.195519	0.314615	0.0812136	0.0294659	0.108378	0.0848972	0.0104257	0.171725	0.128427	0.039291	0.0593875	0.0867318	0.137608	0.0963052
784	784	0.236572	0.294327	0.0589736	0.0550376	0.136284	0.0818103	0.0227074	0.172072	0.0618034	0.0592503	0.0823345	0.08449	0.159817	0.0868455
785	785	0.190578	0.300562	0.0681474	0.0631611	0.110539	0.0911888	0.0167598	0.16647	0.0777202	0.0457399	0.0674244	0.082945	0.159126	0.115543
786	786	0.253135	0.247075	0.0780669	0.0628707	0.0992175	0.0995282	0.0295567	0.169695	0.0652504	0.0446178	0.0874169	0.0912925	0.129745	0.102754
787	787	0.302607	0.274646	0.103124	0.0536836	0.0846395	0.0915493	0.0525337	0.174854	0.0935849	0.124255	0.087886	0.0829455	0.107545	0.078343
788	788	0.28564	0.318629	0.0747798	0.054062	0.100061	0.0908689	0.0569343	0.177576	0.098527	-0.0194915	0.0878661	0.0694661	0.10275	0.102322
789	789	0.328173	0.261702	0.0852776	0.0514154	0.120762	0.0977376	0.0615977	0.108724	0.125872	0.065257	0.104167	0.0667393	0.11814	0.095439
790	790	0.317671	0.245699	0.0718986	0.0441303	0.110119	0.0917166	0.0974026	0.115351	0.142681	0.0246785	0.165523	0.0667367	0.10705	0.0781893
791	791	0.305955	0.259577	0.164945	0.0338725	0.107912	0.0994255	0.0439655	0.182201	0.150629	0.067504	0.132958	0.0793149	0.0898624	0.0839119
792	792	0.13833	0.242732	0.184273	0.0393013	0.0716593	0.082414	0.0389823	0.0819035	0.141276	-0.013972	0.122719	0.0740642	0.128687	0.0555556
793	793	0.18844	0.242793	0.114432	0.029877	0.0744681	0.0832976	0.0280592	0.0408432	0.125475	-0.0518018	0.159061	0.0810364	0.0683761	0.0777827
794	794	0.158889	0.291362	0.131912	0.0347198	0.0830261	0.0886403	0.077812	0.0271003	0.16388	-0.0828026	0.168303	0.0809859	0.0551054	0.0997669
795	795	0.104253	0.28441	0.143961	0.0371747	0.0858406	0.0906724	0.0776187	0.0498961	0.0890805	-0.0190862	0.218887	0.078771	0.0675749	0.0774527
796	796	0.159597	0.314264	0.126597	0.0299029	0.100575	0.0796273	0.0846505	0.181616	0.142114	0.010343	0.218839	0.0987287	0.0502328	0.0915458
797	797	0.169474	0.325052	0.109796	0.0266775	0.0889921	0.106115	0.156913	0.240138	0.141751	0.0783824	0.207966	0.100779	0.0577883	0.100872
798	798	0.110885	0.352818	0.120448	0.0284963	0.0835399	0.162608	0.131222	0.213278	0.131872	0.0560287	0.163662	0.111278	0.0608141	0.128369
799	799	0.125598	0.341995	0.102896	0.0447119	0.0860461	0.214791	0.0986533	0.190111	0.157895	0.0644816	0.0961678	0.111538	0.071953	0.0800772
800	800	0.187721	0.337517	0.101606	0.0713846	0.109202	0.235094	0.115597	0.219011	0.140625	0.0656035	0.0734306	0.0986301	0.0876324	0.0686752
801	801	0.209421	0.381193	0.0950364	0.0757757	0.103351	0.273502	0.126068	0.192253	0.0490537	0.0660053	0.0724994	0.0707071	0.0639444	0.0654392
802	802	0.229368	0.367756	0.076139	0.0794118	0.118212	0.26657	0.108591	0.170177	0.0247243	0.0389304	0.0729927	0.0582036	0.0603363	0.0873033
803	803	0.24303	0.406109	0.0734286	0.100146	0.113611	0.245087	0.134042	0.218827	0.0752688	0.070275	0.0569366	0.0581336	0.0615996	0.0971564
804	804	0.248728	0.376573	0.105882	0.0975029	0.100358	0.241379	0.0889861	0.226667	0.0812162	0.0325279	0.0624041	0.0639785	0.0599613	0.103107
805	805	0.266532	0.354839	0.117144	0.0823529	0.0983836	0.224368	0.0993138	0.279759	0.0776656	0.0180383	0.0473343	0.0600536	0.0667981	0.0935636
806	806	0.283354	0.349229	0.0898614	0.0716228	0.0929769	0.202842	0.10605	0.308206	0.0857351	0.0458115	0.0770015	0.0566658	0.0771114	0.0858691
807	807	0.295484	0.299693	0.0806154	0.0671528	0.0986374	0.210474	0.0985255	0.27074	0.0714812	0.0272727	0.0694586	0.0538213	0.119447	0.113907
808	808	0.286599	0.298142	0.0970099	0.071386	0.105833	0.196313	0.0823812	0.275168	0.0921659	0.0625543	0.0706843	0.0451514	0.104778	0.0938645
809	809	0.291317	0.324265	0.0789569	0.0841339	0.10002	0.137812	0.0901961	0.284884	0.0648829	0.0416269	0.0559691	0.0633232	0.0779721	0.10055
810	810	0.299864	0.342037	0.11087	0.0795948	0.0997501	0.0923729	0.0687698	0.236612	0.0492299	0.0818485	0.0643755	0.0673918	0.0646917	0.119852
811	811	0.301356	0.351171	0.0682927	0.0777681	0.0967742	0.0862579	0.073805	0.197293	0.0476706	0.0539394	0.069663	0.071024	0.0656	0.101133
812	812	0.310435	0.331145	0.0849736	0.0696721	0.0842366	0.0668033	0	0.184673	0.0477716	0.0369127	0.0919765	0.0722318	0.0568562	0.101962
813	813	0.300803	0.337364	0.0716192	0.064722	0.0832517	0.062274	-0.113314	0.149049	0.0704309	0.095546	0.0952253	0.0749727	0.0614334	0.0960279
814	814	0.289112	0.292818	0.068018	0.0617284	0.0923631	0.0673659	-0.107872	0.0885757	0.109239	0.0434445	0.089895	0.0732164	0.0879243	0.103507
815	815	0.30007	0.268237	0.0417344	0.0395907	0.10379	0.0641255	-0.0863836	0.111576	0.10023	0.104167	0.0854643	0.0846774	0.0941405	0.0881685
816	816	0.274348	0.279155	0.0456989	0.0487552	0.0814874	0.0813532	-0.091954	0.117873	0.0962963	0.159875	0.0643915	0.0893217	0.0738916	0.0961618
817	817	0.255319	0.286858	0.0744787	0.056109	0.0894705	0.12118	0.0585585	0.137859	0.0551972	0.0914939	0.102129	0.0886755	0.0868106	0.086174
818	818	0.256198	0.297241	0.0628815	0.0692269	0.0833001	0.153244	0.126725	0.106189	0.0852941	0.0645793	0.0611247	0.0892231	0.0856476	0.0897677
819	819	0.235312	0.29295	0.0446071	0.0590203	0.0901468	0.148727	0.0883095	0.0854858	0.134602	-0.0260116	0.0775393	0.0820976	0.0843935	0.0875499
820	820	0.388653	0.299647	0.120066	0.0517546	0.0934269	0.117081	0.112631	0.108682	0.0993657	-0.037786	0.109921	0.0857048	0.086557	0.0858995
821	821	0.421459	0.308862	0.0835104	0.0498915	0.0875979	0.123107	0.116826	0.121043	0.114471	0.0537517	0.205944	0.0962119	0.0831199	0.103904
822	822	0.340357	0.346512	0.101579	0.0450751	0.11582	0.109195	0.116296	0.139535	0.108897	0.0315361	0.174197	0.0952055	0.0964853	0.120362
823	823	0.296066	0.310796	0.104856	0.0447437	0.107016	0.088769	0.130976	0.125179	0.0871261	0.0608398	0.156562	0.0957592	0.0994016	0.0939466
824	824	0.261923	0.200528	0.0779088	0.0528455	0.128367	0.068903	0.106527	0.127401	0.124018	0.0365552	0.152322	0.0981488	0.124125	0.104566
825	825	0.239536	0.207148	0.0778354	0.0333911	0.105646	0.0668733	0.124107	0.169631	0.183314	0.0256571	0.17349	0.0801919	0.137433	0.0997398
826	826	0.214306	0.233044	0.0940541	0.0568624	0.134659	0.0699316	0.125458	0.20155	0.147841	0.0302664	0.119583	0.0780287	0.0994379	0.166083
827	827	0.233195	0.245829	0.0494838	0.0546154	0.13953	0.0783174	0.103504	0.162504	0.16023	0.0309524	0.0941301	0.0882553	0.0918657	0.17554
828	828	0.266688	0.277924	0.0530854	0.0612436	0.130586	0.0942496	0.0261828	0.181032	0.147451	0.0169997	0.0982539	0.0681537	0.125543	0.200503
829	829	0.2814	0.278668	-0.0154152	0.0195614	0.120945	0.0874455	0.107744	0.236913	0.136607	0.0440105	0.12383	0.0723994	0.0848578	0.170343
830	830	0.256328	0.285332	0.093779	-0.00510376	0.0945505	0.101037	0.0843571	0.166842	0.153657	0.0517039	0.111636	0.0774745	0.133761	0.214323
831	831	0.228609	0.374587	0.101389	0.0592165	0.0527817	0.10354	0.027877	0.152388	0.130529	0.0530056	0.0797508	0.082465	0.134764	0.10841
832	832	0.17234	0.310767	0.0571769	0.0334162	0.076087	0.0982345	-0.00907443	0.147431	0.101759	0.0478123	0.0533257	0.0886968	0.130744	0.0881401
833	833	0.179336	0.342182	0.0785606	0.0608496	0.114165	0.0887026	0.0359712	0.184679	0.0903832	0.0639054	0.0482597	0.0765119	0.111178	0.0815363
834	834	0.229616	0.345694	0.0665188	0.0632911	0.139064	0.0788793	0.0141988	0.146016	0.147959	0.0496115	0.027745	0.0711462	0.118675	0.102024
835	835	0.19649	0.27717	0.0756302	0.0628019	0.157761	0.0830535	0.0665895	0.15824	0.0750491	0.0498623	0.0345766	0.0876351	0.123328	0.0821587
836	836	0.259784	0.295047	0.0645429	0.0462887	0.152403	0.0939672	0.143617	0.196896	0.0830662	0.0557742	0.0590948	0.0818182	0.0953035	0.0786517
837	837	0.286374	0.34	0.0985151	0.0578369	0.112876	0.0939275	0.176602	0.113956	0.11746	0.0289139	0.0934393	0.0819932	0.114966	0.0842889
838	838	0.295806	0.319655	0.0918041	0.0495726	0.114886	0.0852097	0.168772	0.122674	0.113409	0.0354391	0.0781785	0.0719875	0.115312	0.0733771
839	839	0.330946	0.295207	0.087068	0.0489913	0.098032	0.0765529	0.205736	0.129842	0.114428	0.0244499	0.121348	0.0646791	0.122667	0.0812014
840	840	0.324074	0.338779	0.0788725	0.0377074	0.126164	0.0722352	0.108886	0.106687	0.125294	0.0463392	0.137204	0.080134	0.118193	0.0739492
841	841	0.340694	0.338179	0.263763	0.0366732	0.137444	0.0816371	0.0547019	0.126667	0.146832	0.0313183	0.1317	0.0759657	0.118964	0.114952
842	842	0.190412	0.339872	0.221272	0.0409005	0.119559	0.0881645	0.0521235	0.10211	0.128236	-0.0589255	0.187055	0.091601	0.118582	0.0942567
843	843	0.185147	0.318352	0.254549	0.0519527	0.114796	0.0819113	0.0378064	0.0334728	0.185185	-0.0235783	0.158481	0.0900109	0.0830112	0.108325
844	844	0.177312	0.306322	0.32007	0.0269075	0.0783438	0.0881525	0.0177706	0.0882681	0.203642	0.054692	0.246948	0.100718	0.054429	0.103233
845	845	0.146687	0.315114	0.254482	0.0197983	0.0799251	0.0818162	0.0411741	0.116098	0.192878	0.0909091	0.237698	0.117504	0.032563	0.0940125
846	846	0.10378	0.318994	0.212008	0.00682014	0.0734694	0.0833333	0.11473	0.179487	0.14569	0.0664184	0.190514	0.122361	0.0366098	0.121308
847	847	0.199439	0.271552	0.174221	0.0484758	0.0841646	0.103665	0.109709	0.270696	0.160568	0.039039	0.176211	0.149352	0.0660426	0.0973452
848	848	0.170647	0.291646	0.151982	0.041816	0.0861829	0.143634	0.0939876	0.248302	0.126206	0.034331	0.0896517	0.154148	0.0674157	0.0839506
849	849	0.129198	0.326291	0.111347	0.0713229	0.170591	0.207135	0.096878	0.192547	0.115789	0.0318417	0.0623752	0.111209	0.0734398	0.0652174
850	850	0.180481	0.377116	0.113011	0.0781845	0.129894	0.229719	0.0999663	0.209125	0.0572119	0.0566604	0.0677493	0.0831643	0.0986842	0.0597839
851	851	0.22553	0.431532	0.116472	0.0747209	0.123485	0.273557	0.100727	0.166068	0.0354391	0.0640777	0.0617349	0.0798328	0.10151	0.0981657
852	852	0.235852	0.371626	0.0758361	0.0894495	0.12194	0.278549	0.11683	0.148333	0.0641388	0.0659706	0.0571429	0.0660167	0.0847315	0.0812736
853	853	0.247086	0.333762	0.103726	0.0909616	0.100886	0.267497	0.0514638	0.216309	0.0870471	0.0301556	0.0521985	0.0649769	0.0766037	0.104905
854	854	0.248702	0.339495	0.109096	0.0711905	0.0965282	0.263437	0.0791512	0.234899	0.066432	0.0253456	0.0461772	0.0610283	0.0980747	0.108951
855	855	0.251541	0.383142	0.0810933	0.0716702	0.100198	0.249087	0.0760642	0.29555	0.0654	0.0103226	0.0565262	0.0659053	0.0896552	0.106655
856	856	0.270471	0.373188	0.0863768	0.0762167	0.109581	0.244303	0.0756419	0.305173	0.12099	0.0456394	0.0564926	0.055798	0.086277	0.0954536
857	857	0.282398	0.387937	0.0695629	0.0857821	0.11191	0.25253	0.0710594	0.259801	0.15006	0.0147887	0.0591797	0.0589617	0.148468	0.0965992
858	858	0.276372	0.413386	0.0908274	0.0837467	0.114355	0.220054	0.104988	0.292812	0.106383	0.0475177	0.0501654	0.0716368	0.11828	0.0986856
859	859	0.297116	0.421302	0.0723404	0.087909	0.0929265	0.171842	0.0915751	0.269474	0.0949014	0.0607662	0.0700558	0.0792282	0.081133	0.107635
860	860	0.303439	0.413774	0.125621	0.0693451	0.100663	0.104078	0.0534629	0.265665	0.0528491	0.0185582	0.0457672	0.0733735	0.0681368	0.109262
861	861	0.286243	0.348911	0.049081	0.0730533	0.0962246	0.0709392	-0.0546448	0.208595	0.0336718	0.0294002	0.0520637	0.0651243	0.0725261	0.108946
862	862	0.320908	0.361379	0.0961678	0.0738218	0.0964251	0.0674995	-0.0586592	0.20818	0.0590975	0.0546034	0.0408219	0.0807017	0.0696684	0.109332
863	863	0.297541	0.359452	0.0691548	0.0626305	0.0868695	0.0629937	-0.0450205	0.160297	0.095223	0.0298635	0.0505326	0.078733	0.0642939	0.10185
864	864	0.312143	0.337017	0.0746692	0.0416339	0.0870549	0.068376	-0.00757579	0.141533	0.172724	0.112628	0.048703	0.090009	0.0812197	0.0919881
865	865	0.295901	0.347992	0.0432551	0.0634881	0.0841914	0.0645682	0.0573514	0.127406	0.236452	0.198281	0.0550576	0.0932001	0.0909617	0.104702
866	866	0.274498	0.344176	0.05026	0.0510424	0.086611	0.0749147	0.105721	0.13204	0.194677	0.196249	0.0807036	0.0884765	0.0782655	0.0999794
867	867	0.283075	0.386173	0.0652584	0.0691244	0.0886359	0.122227	0.108264	0.126714	0.117624	0.143177	0.0831498	0.0931677	0.0826991	0.0968012
868	868	0.305422	0.370105	0.0633749	0.067702	0.093614	0.140686	0.0894085	0.104038	0.0833933	0.0351562	0.121463	0.0737632	0.125	0.111673
869	869	0.355632	0.338461	0.0647417	0.0630631	0.0949367	0.145471	0.116608	0.106383	0.0852865	0.0518653	0.140215	0.0823146	0.15362	0.0995868
870	870	0.405193	0.308367	0.109206	0.0529101	0.100232	0.106269	0.124547	0.101431	0.114776	0.00739231	0.280556	0.079794	0.133572	0.102932
871	871	0.380196	0.315708	0.0786202	0.0537353	0.0981234	0.105131	0.11598	0.0425824	0.121917	0.0548983	0.329386	0.0937192	0.144257	0.109107
872	872	0.324097	0.317412	0.0839265	0.0399652	0.127703	0.105988	0.112791	0.0513006	0.118154	0.0733057	0.225659	0.0995613	0.134006	0.114726
873	873	0.271462	0.205898	0.079407	0.0667663	0.158381	0.0861177	0.0810652	0.0874439	0.140954	0.0427298	0.202749	0.0830401	0.0834204	0.0939779
874	874	0.26539	0.280814	0.0628331	0.0708187	0.146661	0.0659512	0.143978	0.143306	0.189752	0.0333651	0.13604	0.0713561	0.105933	0.139841
875	875	0.249057	0.25971	0.0777583	0.0385094	0.217645	0.0733624	0.136077	0.126057	0.142276	0.0308176	0.132948	0.0763025	0.134831	0.167806
876	876	0.245747	0.275919	0.045947	0.0560876	0.179683	0.0727588	0.14094	0.13836	0.123452	0.0213806	0.0745946	0.0717797	0.131946	0.233263
877	877	0.277991	0.296102	0.0396624	0.0515772	0.107864	0.0822898	0.0473485	0.190522	0.120246	0.031003	0.0930626	0.0533615	0.12027	0.212043
878	878	0.295297	0.310564	0.0767046	0.0414653	0.0819418	0.0829674	0.0393443	0.186645	0.137172	0.0454546	0.104704	0.0680876	0.0951518	0.221072
879	879	0.282888	0.294369	0.0291375	0.04184	0.133703	0.0769231	-0.0854573	0.209383	0.140418	0.0512453	0.117035	0.0787953	0.0757609	0.222582
880	880	0.308905	0.438262	0.147739	0.0393771	0.0557907	0.0817638	-0.158035	0.184742	0.130394	0.0547235	0.166376	0.0865322	0.0960699	0.118483
881	881	0.251285	0.403097	0.0706985	0.046068	0.117755	0.0757775	-0.0560538	0.186189	0.107495	0.0525127	0.143134	0.0783193	0.105782	0.15114
882	882	0.176083	0.454054	0.117599	0.0597755	0.0799554	0.0761946	-0.0101465	0.15285	-0.019093	0.0581022	0.0893817	0.0714053	0.114618	0.0764808
883	883	0.173567	0.400715	0.11848	0.0609123	0.0851202	0.074804	0.0423163	0.135046	0.111577	0.0569254	0.163012	0.0731062	0.0972044	0.0825467
884	884	0.184733	0.364815	0.0793244	0.0651112	0.164378	0.0725312	0.143178	0.123843	0.0913735	0.0619359	0.120872	0.088431	0.100746	0.089867
885	885	0.193963	0.385226	0.0862563	0.0501491	0.225237	0.0892019	0.150166	0.159744	0.105475	0.0724913	0.10438	0.0737218	0.109589	0.0842594
886	886	0.261815	0.403084	0.0213182	0.0410881	0.213107	0.0794998	0.138167	0.210149	0.122443	0.0583391	0.132786	0.0706703	0.102995	0.0849396
887	887	0.320592	0.467839	0.0635586	0.0567583	0.182381	0.0885963	0.157258	0.163796	0.111253	0.0364437	0.0591463	0.0745254	0.105944	0.0887441
888	888	0.322176	0.410309	0.0333564	0.0558789	0.192966	0.0901768	0.164948	0.240929	0.0944546	0.0293454	0.10589	0.0719059	0.0836402	0.110576
889	889	0.286894	0.363152	0.0624216	0.0386707	0.168635	0.0742832	0.173522	0.249115	0.102439	0.0235174	0.152642	0.0742166	0.0956757	0.1375
890	890	0.322922	0.396562	0.0854414	0.0318644	0.10776	0.0715651	0.131693	0.196098	0.126941	-0.00316657	0.149839	0.09146	0.120996	0.0876638
891	891	0.331625	0.415307	0.266018	0.0496806	0.12036	0.0852114	0.102281	0.153513	0.150638	0.0372058	0.110431	0.0991887	0.115679	0.103704
892	892	0.246048	0.401832	0.33278	0.0576489	0.119149	0.0938303	0.0926594	0.128205	0.20915	-0.0161551	0.122394	0.123506	0.0839161	0.106682
893	893	0.208431	0.409631	0.311166	0.0317057	0.098479	0.0820513	0.0274361	0.123867	0.208314	-0.0868597	0.178365	0.16752	0.104986	0.104654
894	894	0.211169	0.371048	0.420906	0.0398714	0.105681	0.0856031	0.0197396	0.134357	0.205821	-0.00826449	0.183388	0.177298	0.0372421	0.0962779
895	895	0.187212	0.380468	0.412283	0.0195944	0.0889977	0.0817717	0.0490441	0.0948419	0.159551	0.0605364	0.168168	0.173566	0.0423253	0.092952
896	896	0.137891	0.407035	0.357043	0.0296156	0.099054	0.0853476	0.0885168	0.133294	0.197452	0.0314685	0.169252	0.184457	0.043364	0.140102
897	897	0.157379	0.360437	0.330631	0.0281124	0.0895066	0.109099	0.103523	0.213303	0.160289	0.0606452	0.140879	0.158114	0.058221	0.0847887
898	898	0.116547	0.386395	0.191147	0.0721874	0.197242	0.149939	0.0993643	0.248	0.156928	0.0627178	0.0729814	0.10385	0.0591797	0.0926138
899	899	0.13355	0.353448	0.121528	0.0784368	0.173252	0.179645	0.113368	0.191149	0.165618	0.0545455	0.0614613	0.0850933	0.0452841	0.0653448
900	900	0.165953	0.37518	0.115882	0.0655069	0.14797	0.215457	0.111111	0.169	0.0819672	0.0323694	0.048442	0.0608541	0.059706	0.0730813
901	901	0.208936	0.395349	0.124314	0.0790724	0.120916	0.276547	0.114883	0.172537	0.0671611	0.0654664	0.0412563	0.0680109	0.0789474	0.109459
902	902	0.233286	0.406052	0.106155	0.08826	0.0991185	0.288583	0.104252	0.170793	0.104167	0.0331902	0.0709917	0.0761183	0.0963796	0.0979619
903	903	0.237964	0.316564	0.108545	0.0691895	0.105515	0.289326	0.0925744	0.226891	0.125	0.0691574	0.0574949	0.0672451	0.0994643	0.115071
904	904	0.256079	0.364751	0.136854	0.0716622	0.0991502	0.270077	0.0801168	0.205045	0.135626	0.0714932	0.065481	0.0540964	0.142492	0.0928143
905	905	0.233101	0.302128	0.0915411	0.0798094	0.101896	0.258893	0.0762332	0.288193	0.139262	0.00391475	0.047185	0.0670732	0.165626	0.109229
906	906	0.236398	0.325945	0.0794869	0.0840909	0.116656	0.270464	0.048927	0.308787	0.146947	0.034558	0.0480349	0.0741886	0.118241	0.100833
907	907	0.284047	0.34241	0.084949	0.080668	0.1	0.273164	0.105559	0.262381	0.167336	0.00578034	0.0316159	0.0723912	0.114321	0.101486
908	908	0.27553	0.386313	0.0750564	0.083104	0.0969305	0.263912	0.112203	0.278529	0.188419	0.0109974	0.0288019	0.0753707	0.104688	0.116337
909	909	0.299774	0.415565	0.101001	0.0694223	0.107802	0.20183	0.134791	0.292388	0.14	0.0325685	0.0384989	0.0767582	0.0741402	0.105962
910	910	0.320755	0.364103	0.0948905	0.0754098	0.0950884	0.104595	0.038674	0.26469	0.083668	-0.00682853	0.0520799	0.0720474	0.0599508	0.108198
911	911	0.286833	0.389447	0.0905045	0.0672981	0.0947286	0.0661809	0.0383912	0.222159	0.074041	0.00717707	0.0591202	0.0763766	0.0634286	0.139888
912	912	0.308651	0.391416	0.081118	0.0700546	0.0937997	0.0650439	0.0786517	0.195722	0.123202	0.00865265	0.0518162	0.0738916	0.0651801	0.0925244
913	913	0.301094	0.360465	0.0643221	0.0465872	0.0910572	0.0655705	0.0881378	0.143467	0.223729	-0.0008496	0.0455897	0.0900299	0.0718358	0.108751
914	914	0.289499	0.337492	0.0488578	0.0587481	0.0877617	0.0649034	0.0603325	0.0919633	0.294489	0.0457958	0.054519	0.0737117	0.0814149	0.0959627
915	915	0.28949	0.355609	0.0863061	0.0581502	0.0778996	0.0684765	0.07166	0.113851	0.308963	0.226823	0.0735761	0.0820748	0.0933113	0.151298
916	916	0.291362	0.392817	0.0189243	0.0817669	0.092761	0.0666125	0.0906555	0.17409	0.301906	0.225357	0.102978	0.0954374	0.0983312	0.100124
917	917	0.34715	0.3958	0.0548058	0.0612245	0.0902298	0.0879075	0.125916	0.157314	0.171875	0.127386	0.133297	0.0726754	0.13841	0.1318
918	918	0.408675	0.343852	0.0560894	0.0523332	0.0869164	0.120108	0.126816	0.130703	0.0679723	0.130045	0.142379	0.0695476	0.222043	0.121101
919	919	0.411076	0.394968	0.0884936	0.0567686	0.0882877	0.134174	0.0902755	0.135012	0.0597634	0.0161962	0.19928	0.0832262	0.199864	0.115567
920	920	0.38186	0.444506	0.0545555	0.0574182	0.142917	0.108556	0.0998871	0.159619	0.10586	0.0213933	0.267148	0.0764744	0.200276	0.113467
921	921	0.325075	0.433155	0.0736518	0.0540275	0.287432	0.0979351	0.105735	0.131178	0.149601	0.0739282	0.407878	0.0829081	0.227648	0.117896
922	922	0.310254	0.37651	0.0581978	0.110977	0.250909	0.0878395	0.11869	0.0972162	0.169031	0.078751	0.441051	0.0845481	0.213293	0.0908365
923	923	0.261679	0.256662	0.0600269	0.0991561	0.165176	0.0815254	0.133666	0.115681	0.146181	0.0556752	0.3875	0.0729585	0.181098	0.122697
924	924	0.275382	0.336425	0.0481863	0.048583	0.131655	0.0723347	0.107221	0.16129	0.139947	0.0316456	0.229443	0.0738211	0.113631	0.208943
925	925	0.266644	0.29205	0.055108	0.037279	0.0783561	0.0621396	0.159352	0.162477	0.106918	0.0280492	0.150293	0.0882825	0.0951123	0.308857
926	926	0.287273	0.318403	0.0570976	0.0581646	0.0432433	0.0729123	0.209478	0.153439	0.113419	0.0214219	0.118461	0.0691044	0.0781614	0.326496
927	927	0.293911	0.355363	-0.00524245	0.0441491	0.0106157	0.0749186	0.0282609	0.169161	0.109339	0.0348042	0.112798	0.0709242	0.0808758	0.284125
928	928	0.28212	0.370259	0.03772	0.0438367	0.0751515	0.0685475	0.0496454	0.129791	0.132729	0.0519283	0.131766	0.0743646	0.112821	0.3156
929	929	0.318923	0.385612	0.00546452	0.0212127	0.0340705	0.0773565	0.0611855	0.13888	0.118231	0.0518179	0.128188	0.062642	0.127768	0.308213
930	930	0.288793	0.397622	0.0633353	0.0520345	0.0648031	0.0789814	0.126514	0.192144	0.12701	0.0545454	0.143269	0.0623013	0.100066	0.186362
931	931	0.218082	0.401256	0.0548436	0.0547317	0.0669725	0.0848126	0.101243	0.197452	0.0721794	0.0547633	0.175476	0.0673704	0.101813	0.15269
932	932	0.157199	0.461842	0.107955	0.0641062	0.0817778	0.0886743	0.103831	0.153986	0.1044	0.0574645	0.102855	0.0820385	0.109179	0.101095
933	933	0.171075	0.453836	0.126104	0.0638178	0.0863698	0.0779249	0.111677	0.136795	0.0852334	0.0530232	0.249522	0.0790698	0.116707	0.0700732
934	934	0.15889	0.473152	0.11925	0.0507042	0.0722071	0.0777048	0.0903451	0.146421	0.124924	0.086351	0.279693	0.0684084	0.119827	0.0885655
935	935	0.213033	0.481038	0.136616	0.0562846	0.156494	0.0879752	0.0823717	0.160848	0.134424	0.0754893	0.213711	0.0724138	0.120357	0.0915556
936	936	0.303624	0.492754	0.0954512	0.0681411	0.176471	0.086758	0.152722	0.213663	0.122618	0.0683845	0.205158	0.0752469	0.118569	0.0785124
937	937	0.355255	0.488644	0.0878049	0.0511211	0.197452	0.0931843	0.147862	0.348946	0.113075	0.0332016	0.116874	0.0926889	0.108414	0.0912521
938	938	0.324917	0.462536	0.060266	0.0455097	0.231085	0.0854586	0.143023	0.455338	0.130878	0.0280624	0.1486	0.0857794	0.0902546	0.122789
939	939	0.299748	0.373984	0.0713562	0.0456852	0.155003	0.0836568	0.148963	0.465965	0.137732	0.0230923	0.140584	0.0925236	0.102021	0.113799
940	940	0.315571	0.426025	0.0742686	0.067188	0.141995	0.0751445	0.1402	0.420384	0.161776	-0.00196462	0.163121	0.0940082	0.108209	0.0797152
941	941	0.319058	0.427313	0.22531	0.0530973	0.122661	0.0780021	0.136012	0.315523	0.116836	-0.0504549	0.130897	0.10057	0.0968238	0.0811646
942	942	0.222689	0.451957	0.299465	0.046403	0.0893448	0.081494	0.055147	0.234432	0.132222	0.0163244	0.134522	0.128575	0.0915072	0.0829837
943	943	0.235872	0.461355	0.105478	0.0507224	0.100343	0.0787775	0.0555555	0.228634	0.152074	0.0263375	0.152931	0.188199	0.120578	0.092952
944	944	0.23505	0.422719	0.468135	0.0485143	0.107409	0.0824984	0.0439425	0.146444	0.13243	0.0484018	0.13707	0.196787	0.0484694	0.0852517
945	945	0.20369	0.449974	0.513445	0.0374787	0.094471	0.0823088	0.0323363	0.141768	0.168696	0.0553191	0.181179	0.19137	0.0479027	0.0939645
946	946	0.192852	0.458291	0.440518	0.0424974	0.0975143	0.0844238	0.0707669	0.115268	0.172862	0.0366197	0.146928	0.179786	0.0482233	0.100743
947	947	0.15265	0.376749	0.435048	0.0462029	0.174867	0.0929163	0.11775	0.207407	0.162414	0.0630311	0.138593	0.118987	0.0602641	0.0878953
948	948	0.159583	0.3989	0.301053	0.0665646	0.190017	0.131963	0.127667	0.251889	0.17819	0.0684039	0.0534193	0.0773263	0.0699663	0.0741608
949	949	0.106297	0.344304	0.143349	0.0709347	0.175132	0.167052	0.117535	0.232829	0.0491568	0.0801728	0.0679131	0.0736968	0.0749465	0.0802073
950	950	0.122764	0.3061	0.0949125	0.0720372	0.141667	0.223159	0.110115	0.152294	0.118582	0.0721266	0.0241782	0.0755277	0.0731215	0.0807205
951	951	0.165692	0.316888	0.132632	0.0678359	0.115085	0.277122	0.093307	0.158711	0.128314	0.0510083	0.0597136	0.0686071	0.0909944	0.115956
952	952	0.211889	0.294931	0.124313	0.0762887	0.120879	0.284775	0.0817069	0.173219	0.205115	0.0266927	0.0544366	0.0668081	0.146056	0.112769
953	953	0.24516	0.228941	0.12586	0.0508304	0.108264	0.282468	0.0625221	0.180095	0.148954	0.0660511	0.0580205	0.0687907	0.152274	0.095322
954	954	0.255392	0.282526	0.0935162	0.07787	0.128313	0.288017	0.0561151	0.189495	0.12	0.075895	0.0659186	0.0662312	0.105823	0.0857819
955	955	0.256809	0.215587	0.0894789	0.0643684	0.117172	0.292961	-0.0227704	0.306358	0.138784	0.00513258	0.061776	0.0842697	0.0794771	0.0936855
956	956	0.249263	0.24236	0.099374	0.078727	0.106454	0.286703	0.0304507	0.301301	0.179535	0.00631266	0.0406327	0.0813638	0.0714146	0.108469
957	957	0.262098	0.270936	0.0685039	0.074934	0.113347	0.301697	0.154	0.288223	0.244444	0.0218716	0.0189132	0.0747645	0.0793775	0.124662
958	958	0.271143	0.32503	0.0958825	0.071262	0.105442	0.260524	0.175423	0.238414	0.228266	0.022003	0.0341113	0.0822547	0.101515	0.132747
959	959	0.300463	0.338939	0.10966	0.0646388	0.106366	0.182558	0.0956768	0.222792	0.165321	0.0146266	0.0357143	0.0927972	0.102705	0.140867
960	960	0.323803	0.371943	0.083346	0.0841415	0.0960673	0.121884	0.0984991	0.257437	0.0977962	-0.00854034	0.0379824	0.0754941	0.0771325	0.132298
961	961	0.298464	0.314424	0.0979209	0.0786049	0.100571	0.0812958	0.0842926	0.250142	0.124449	0.0212934	0.0417571	0.0775967	0.0878156	0.158923
962	962	0.284145	0.332438	0.0723809	0.0660874	0.108657	0.0645355	0.0625425	0.203417	0.19698	0.0231384	0.0718593	0.0656445	0.0716961	0.164117
963	963	0.288032	0.396783	0.0952381	0.047482	0.106651	0.0629399	0.0405855	0.189693	0.304874	0.0164664	0.0586518	0.0764951	0.063655	0.15106
964	964	0.31686	0.387728	0.0149254	0.0645161	0.103734	0.0659609	0.0732829	0.0915958	0.381208	0.0502934	0.0895	0.0723921	0.0637242	0.131983
965	965	0.312268	0.412145	0.154971	0.0806224	0.0947368	0.0664506	0.085656	0.129692	0.392205	0.304069	0.10758	0.086351	0.0678667	0.172861
966	966	0.296437	0.399876	0.0577908	0.0641578	0.0948638	0.0626769	0.10976	0.122406	0.262348	0.250238	0.150094	0.0720472	0.102071	0.102592
967	967	0.408138	0.357099	0.0642159	0.0630831	0.0870814	0.0729912	0.10119	0.140105	0.153064	0.109731	0.181404	0.083805	0.158628	0.14362
968	968	0.423366	0.346581	0.0477638	0.0605691	0.0858883	0.110264	0.0805538	0.104341	0.0900666	0.0630252	0.213703	0.0904142	0.238221	0.108255
969	969	0.375675	0.382056	0.0948396	0.0490308	0.183645	0.134744	0.0918636	0.112094	0.115233	-0.0342139	0.218548	0.086352	0.239344	0.128307
970	970	0.368014	0.431035	0.0117371	0.0706773	0.280684	0.116711	0.11374	0.128039	0.15122	0.0252101	0.300932	0.0719243	0.259199	0.0965611
971	971	0.289633	0.393035	0.0181818	0.0754663	0.28841	0.0954994	0.135844	0.127087	0.169906	0.0478118	0.469472	0.0618136	0.244191	0.129254
972	972	0.28929	0.341165	0.00938966	0.133482	0.184046	0.0864662	0.119739	0.125988	0.118632	0.0917054	0.571283	0.0680272	0.236272	0.0809295
973	973	0.282709	0.275669	0.00212613	0.106591	0.0903141	0.0820641	0.158892	0.136608	0.108734	0.0622732	0.42882	0.0658346	0.125806	0.205135
974	974	0.291112	0.300333	-0.00488484	0.0435978	-0.0155356	0.0851636	0.20997	0.146157	0.134036	0.0344611	0.359424	0.0609795	0.102196	0.31716
975	975	0.283259	0.371588	0.0155148	0.0301879	-0.0128079	0.0717927	0.299692	0.1624	0.176596	0.024557	0.215017	0.070315	0.0791306	0.396767
976	976	0.292068	0.383721	0.0131274	0.0700023	0.0322581	0.0713989	0.1133	0.153846	0.14741	0.0195107	0.120477	0.0705368	0.0927374	0.390728
977	977	0.293413	0.373414	0.057377	0.00612742	0.0503597	0.087532	0.156442	0.179673	0.136997	0.0244349	0.15008	0.0646673	0.123399	0.354657
978	978	0.284281	0.382646	0.0604575	0.0286576	0.0561107	0.0776216	0.152956	0.198906	0.10914	0.0446756	0.214768	0.066416	0.108223	0.295035
979	979	0.338387	0.411852	0.029889	-0.00921188	0.0580456	0.0751323	0.141844	0.165916	0.098862	0.051749	0.152871	0.058787	0.08023	0.201611
980	980	0.235673	0.413235	0.0459318	0.0516717	-0.0389462	0.0836207	0.136134	0.162837	0.0941943	0.0563542	0.156884	0.0669991	0.0901288	0.214132
981	981	0.169603	0.414201	0.0313953	0.0313521	0.0550807	0.0867679	0.12069	0.130678	0.0810811	0.0561529	0.149213	0.0805453	0.0902929	0.174851
982	982	0.161737	0.426974	0.0714688	0.079123	0.0472441	0.100179	0.0800898	0.153846	0.10789	0.0563003	0.182349	0.0966768	0.0930396	0.095638
983	983	0.120579	0.435158	0.104049	0.0557417	0.00921188	0.100913	0.0937614	0.147596	0.136391	0.0457477	0.253974	0.0733858	0.098604	0.0901846
984	984	0.180328	0.458213	0.0915033	0.0546495	0.0579216	0.0821679	0.119751	0.182807	0.146309	0.0668287	0.192481	0.0730074	0.100104	0.0975108
985	985	0.27289	0.410274	0.147786	0.0716366	0.0882957	0.0881125	0.156797	0.195977	0.144832	0.0442478	0.158367	0.060686	0.0964863	0.0743689
986	986	0.314865	0.39726	0.127605	0.0599135	0.116977	0.0931892	0.147834	0.262774	0.116237	0.080316	0.119171	0.0593166	0.114127	0.0865235
987	987	0.289031	0.355805	0.126064	0.0499688	0.163353	0.0827133	0.160284	0.394638	0.154086	0.0423198	0.0962744	0.0802508	0.121495	0.080608
988	988	0.320099	0.375691	0.105931	0.0389772	0.116264	0.0762527	0.142568	0.4493	0.150363	0.0327368	0.135495	0.105956	0.111468	0.098492
989	989	0.324481	0.294292	0.066561	0.0297099	0.110127	0.086766	0.152211	0.493238	0.137584	0.00991133	0.158857	0.117368	0.0927235	0.0878282
990	990	0.337544	0.322703	0.084998	0.0453594	0.118327	0.0878261	0.164806	0.478004	0.177019	0.0463018	0.035982	0.122727	0.0795998	0.0855526
991	991	0.338381	0.321188	0.160579	0.0202404	0.141136	0.0808474	0.120116	0.361441	0.142267	0.00974477	0.0127341	0.120923	0.0977778	0.0939505
992	992	0.235074	0.446891	0.315327	0.0360014	0.0742319	0.0775161	0.0387216	0.220878	0.156135	0.0457963	0.000727285	0.152957	0.11601	0.0692343
993	993	0.234464	0.39759	0.134557	0.0518117	0.0488372	0.0810697	-0.0067355	0.192103	0.147001	0.0524908	0.135821	0.186236	0.117364	0.100552
994	994	0.232824	0.346278	0.400806	0.0519481	0.083792	0.0873745	0.0513383	0.143662	0.113826	0.047481	0.103041	0.207476	0.0735025	0.0841734
995	995	0.190654	0.417486	0.508792	0.032445	0.0735815	0.0816327	0.0319234	0.156977	0.18617	0.0502674	0.0835401	0.199155	0.078125	0.0804435
996	996	0.190973	0.435442	0.494211	0.0467717	0.0785715	0.0772727	0.0693578	0.135163	0.241331	0.0336222	0.0739893	0.170936	0.0865757	0.0909884
997	997	0.193395	0.389813	0.463239	0.0524994	0.170779	0.103632	0.101132	0.203117	0.0752265	0.0402904	0.106856	0.102518	0.0903603	0.0791685
998	998	0.124896	0.429293	0.311133	0.0729167	0.144695	0.140049	0.100867	0.200946	0.107714	0.0486163	0.0653192	0.0791667	0.0870114	0.0669598
999	999	0.107692	0.405614	0.25429	0.0877684	0.154913	0.17211	0.104701	0.157784	0.0427146	0.0507511	0.105056	0.0692035	0.0771672	0.0845714
1000	1000	0.108596	0.3164	0.150483	0.0778947	0.161826	0.21276	0.102216	0.131443	0.156517	0.0824035	0.0572549	0.0693722	0.0941999	0.079621
1001	1001	0.113196	0.294254	0.114816	0.0735259	0.13986	0.255232	0.115192	0.135606	0.107401	0.0308943	0.0754668	0.0675264	0.0920585	0.107823
1002	1002	0.179673	0.272135	0.119522	0.0634921	0.127996	0.294211	0.111769	0.182284	0.188332	0.0201342	0.0443824	0.0745831	0.0869915	0.106112
1003	1003	0.280453	0.245497	0.0789087	0.0534771	0.10117	0.28667	0.00895524	0.200313	0.145032	0.0289296	0.0309482	0.0735294	0.0697199	0.0826307
1004	1004	0.264242	0.259179	0.121524	0.0756303	0.109266	0.291334	0.0295617	0.252747	0.122605	0.0598489	0.0330229	0.0706994	0.0462648	0.103695
1005	1005	0.281003	0.260163	0.102735	0.0664327	0.112972	0.298953	-0.0261348	0.318033	0.114357	-0.0323956	0.0311948	0.0875457	0.0614847	0.119212
1006	1006	0.271703	0.268916	0.0893931	0.0743716	0.116751	0.291324	-0.0327869	0.291139	0.200194	-0.00394634	0.0129795	0.0817742	0.0730785	0.161343
1007	1007	0.258126	0.285486	0.056498	0.0650468	0.110717	0.304173	0.0915179	0.275542	0.196172	0.0141844	0.0293214	0.0735438	0.0674438	0.165831
1008	1008	0.272435	0.3196	0.130465	0.0808659	0.114297	0.24331	0.152709	0.235226	0.165801	0.00557772	0.0328665	0.0952183	0.0621558	0.196528
1009	1009	0.297544	0.297555	0.0798537	0.0721247	0.110354	0.175094	0.11601	0.22338	0.178735	-0.0137417	0.0384504	0.106477	0.0883249	0.15051
1010	1010	0.299301	0.320473	0.0806075	0.0741886	0.101387	0.153992	0.129549	0.274713	0.126366	-0.00232022	0.0229178	0.0837632	0.0745016	0.142924
1011	1011	0.265013	0.276224	0.0609803	0.0709511	0.0954969	0.102509	0.0871466	0.24376	0.120601	0.0279971	0.021511	0.075069	0.0542933	0.182828
1012	1012	0.31406	0.346764	0.0944882	0.0623724	0.103041	0.0754639	0.0548164	0.176042	0.101646	0.0364124	0.0816	0.0851594	0.0735365	0.15534
1013	1013	0.348997	0.390558	0.0890269	0.0620866	0.110329	0.067053	0.0560906	0.173982	0.248339	0.0378229	0.0624163	0.0966997	0.0740656	0.199669
1014	1014	0.338125	0.376872	-0.000868792	0.0647321	0.107591	0.0797646	0.0782555	0.0836539	0.354642	0.0878924	0.136784	0.0900941	0.0745584	0.188762
1015	1015	0.32707	0.327674	0.100899	0.0968052	0.111776	0.0631323	0.0645161	0.0770826	0.376807	0.316364	0.198241	0.0969001	0.0978705	0.176436
1016	1016	0.371981	0.334095	0.0635809	0.0565949	0.105091	0.0597465	0.102528	0.084041	0.327854	0.239375	0.238031	0.0663591	0.136202	0.155885
1017	1017	0.407821	0.352941	0.0560272	0.0633993	0.143576	0.072542	0.113824	0.0878344	0.219411	0.0766656	0.2639	0.0858957	0.191005	0.133867
1018	1018	0.381773	0.283747	0.0438858	0.0753642	0.0962796	0.110202	0.0972046	0.0778842	0.164001	0.0195313	0.357496	0.0865191	0.235785	0.141108
1019	1019	0.385677	0.200822	0.0779995	0.0659296	0.149135	0.135029	0.0677376	0.148207	0.0975097	0.0234858	0.412865	0.0967309	0.236797	0.155897
1020	1020	0.318733	0.267992	-0.00181818	0.0914299	0.0765786	0.102596	0.112648	0.201702	0.0738637	-0.00268301	0.314747	0.0728264	0.24429	0.120582
1021	1021	0.213608	0.299679	0.0157553	0.0893204	0.159609	0.0917358	0.17209	0.101583	0.140351	0.0407812	0.349074	0.0674729	0.242373	0.164749
1022	1022	0.257767	0.291069	0.0036101	0.132812	0.110959	0.0879042	0.182208	0.121086	0.116488	0.0713309	0.458589	0.0787992	0.194444	0.11524
1023	1023	0.294489	0.302366	-0.0204809	0.0998914	0.0547112	0.0834486	0.189568	0.111682	0.103103	0.0456407	0.380554	0.073125	0.140647	0.222824
1024	1024	0.310178	0.298056	0.00260189	0.0567842	0.0121951	0.083428	0.106533	0.130465	0.104823	0.0228229	0.284848	0.0687167	0.099495	0.280535
1025	1025	0.293703	0.345036	0.0722891	0.0480734	0.0801187	0.0829118	0.214086	0.124209	0.127706	0.0169697	0.112721	0.0731707	0.0877193	0.398659
1026	1026	0.241909	0.367224	0.0844156	0.0464235	0.0511727	0.0755727	0.151581	0.147092	0.122407	0.0221948	0.145161	0.0645367	0.0973134	0.413478
1027	1027	0.263747	0.372333	0.0744681	0.0217477	0.0566038	0.0744863	0.125063	0.165437	0.112335	0.04474	0.132473	0.058378	0.137546	0.327391
1028	1028	0.268015	0.397541	0.0415283	-0.0238908	0.110968	0.0804158	0.117134	0.204707	0.114054	0.0379902	0.140225	0.0605005	0.106533	0.277856
1029	1029	0.231463	0.379494	0.0463259	-0.0651852	0.0861275	0.0772834	0.145082	0.148948	0.117486	0.0383602	0.193975	0.0787802	0.107198	0.233785
1030	1030	0.176471	0.353866	0.0722263	0.0502793	0.0510083	0.0742585	0.150379	0.12782	0.10339	0.0431419	0.211984	0.0933161	0.101005	0.248457
1031	1031	0.146031	0.419002	0.0533562	0.00824666	0.111612	0.0808823	0.126724	0.0803366	0.0980071	0.0454833	0.167945	0.0759936	0.082544	0.179199
1032	1032	0.166717	0.433148	0.050442	0.0465036	0	0.0823833	0.124047	0.105318	0.138131	0.0365325	0.161419	0.0886715	0.0962074	0.131471
1033	1033	0.134849	0.36382	0.0853967	0.0415257	-0.0249768	0.0872861	0.112548	0.0873277	0.130107	0.0327044	0.189043	0.0871501	0.104417	0.127054
1034	1034	0.235464	0.38147	0.0553466	0.050994	-0.0405186	0.10524	0.112093	0.170142	0.143062	0.0449262	0.117057	0.0833333	0.110795	0.0862827
1035	1035	0.276623	0.301163	0.0826033	0.0429375	-0.0519358	0.0893246	0.112863	0.119571	0.12449	0.0555895	0.136766	0.0660562	0.0977118	0.0896703
1036	1036	0.293989	0.290286	0.133884	0.0465261	-0.0277297	0.0859121	0.127076	0.165523	0.121149	0.0808678	0.113111	0.0737982	0.100933	0.0873103
1037	1037	0.255319	0.253578	0.141615	0.0538583	0.0587523	0.0741217	0.168843	0.26413	0.161353	0.0484713	0.149895	0.0799872	0.100789	0.0629067
1038	1038	0.289782	0.273138	0.0882922	0.0328968	0.0760085	0.0737376	0.163366	0.368511	0.156981	0.0285228	0.108434	0.0942438	0.0758432	0.0754438
1039	1039	0.355327	0.312081	0.0750337	0.046669	0.0690571	0.078337	0.141151	0.386752	0.17148	0.00538426	0.0956341	0.120095	0.0798231	0.0802469
1040	1040	0.321652	0.289532	0.0918192	0.0454545	0.0860215	0.0891481	0.144053	0.332415	0.17735	0.0358192	0.0289308	0.133721	0.06204	0.0793269
1041	1041	0.318579	0.261488	0.15285	0.0263158	0.112848	0.0831344	0.129977	0.266667	0.161311	0.0350597	0	0.117898	0.0915493	0.0758735
1042	1042	0.234595	0.346154	0.232208	0.0307529	0.14213	0.0873252	0.0502283	0.240231	0.127111	0.0663302	-0.032175	0.166435	0.137242	0.0691145
1043	1043	0.241873	0.321731	0.193588	0.0485112	0.130881	0.0859635	0.0434782	0.221739	0.150482	0.0411744	-0.0284414	0.203771	0.124485	0.084134
1044	1044	0.196313	0.330348	0.252729	0.0463415	0.0927022	0.0858129	0.092112	0.186441	0.145288	0.0273466	0.144279	0.183537	0.053349	0.0620484
1045	1045	0.213026	0.463415	0.439034	0.049533	0.0829963	0.0889033	0.0422535	0.170702	0.143339	0.00838496	0.143143	0.170482	0.0799552	0.069158
1046	1046	0.202559	0.49769	0.504915	0.0520781	0.124424	0.0845604	0.0144928	0.172515	0.156191	0.0148589	0.119334	0.161793	0.0635665	0.0727316
1047	1047	0.195458	0.458222	0.298739	0.0542447	0.161332	0.108306	0.0403656	0.197829	0.0689282	0.0258244	0.143052	0.0931923	0.0930371	0.0641861
1048	1048	0.11192	0.471883	0.201944	0.0774193	0.172281	0.144998	0.0625465	0.222109	0.105495	0.0166932	0.068391	0.0837923	0.117074	0.0594714
1049	1049	0.137236	0.393597	0.294065	0.0831257	0.196022	0.174416	0.0516786	0.154609	0.0938662	0.0239545	0.0862919	0.0832067	0.0670827	0.0696141
1050	1050	0.11979	0.297063	0.222455	0.0780834	0.16209	0.226106	0.106909	0.126027	0.116883	0.0206061	0.0422968	0.0794725	0.0475615	0.0711346
1051	1051	0.121891	0.310776	0.116038	0.0747601	0.127282	0.286221	0.11414	0.129085	0.112962	0.00254023	0.0593933	0.0717551	0.0644901	0.120948
1052	1052	0.143363	0.318825	0.104133	0.0772026	0.114543	0.305803	-0.0349819	0.150762	0.179715	0.0127179	0.0515513	0.0762981	0.0503311	0.128383
1053	1053	0.211253	0.26581	0.0760369	0.0784449	0.107762	0.291105	0.00273972	0.213882	0.121328	0.00584796	0.0693168	0.0692958	0.0486216	0.118357
1054	1054	0.298943	0.291755	0.0976331	0.0754006	0.112193	0.282299	-0.0225352	0.248485	0.121827	0.0186722	0.047229	0.0840756	0.0953895	0.15619
1055	1055	0.303633	0.309572	0.103941	0.0730873	0.120281	0.290798	-0.0365168	0.30439	0.13313	-0.00813668	0.0374179	0.100209	0.115034	0.145683
1056	1056	0.308879	0.25	0.0800957	0.0696406	0.109281	0.303526	0.0596027	0.271399	0.169259	-0.0117267	0.042735	0.0866441	0.106456	0.166285
1057	1057	0.292571	0.307514	0.0960854	0.0680525	0.106554	0.312988	0.103654	0.249315	0.195791	0.000806465	0.0358474	0.0875927	0.0968809	0.126385
1058	1058	0.29797	0.32875	0.0776479	0.0742358	0.10737	0.259627	0.107252	0.233118	0.170953	-0.000803842	0.0836299	0.0945046	0.0705693	0.154154
1059	1059	0.271805	0.327048	0.0568562	0.0788719	0.106473	0.198853	0.14401	0.213714	0.183016	-0.0262942	0.103052	0.0992844	0.0671555	0.124322
1060	1060	0.296419	0.32971	0.0904611	0.0585673	0.108015	0.180658	0.144574	0.195053	0.159123	0.00151169	0.056778	0.0986403	0.0732389	0.123891
1061	1061	0.312339	0.273425	0.0551724	0.0556348	0.128757	0.130076	0.0586177	0.162431	0.177232	0.0671354	0.0329552	0.0923154	0.089779	0.134177
1062	1062	0.345116	0.369994	0.0808743	0.0614705	0.131808	0.0816588	0.0606401	0.171738	0.0857143	0.0652432	0.0919431	0.0981508	0.0817296	0.123516
1063	1063	0.317857	0.335964	0.0101523	0.0408163	0.105419	0.0761589	0.0687113	0.149723	0.103052	0.069723	0.121569	0.095672	0.0830376	0.172314
1064	1064	0.280959	0.278427	0.0485437	0.0669021	0.123153	0.0657286	0.113356	0.152747	0.176932	0.0466666	0.201584	0.0859669	0.0917393	0.148919
1065	1065	0.368299	0.302229	0.0623936	0.0885559	0.167315	0.0554765	0.081855	0.0921986	0.227786	0.157856	0.285071	0.0929167	0.0939318	0.158419
1066	1066	0.423512	0.279793	0.065795	0.0693069	0.139391	0.0653635	0.0856523	0.0719916	0.256514	0.186603	0.252435	0.0670155	0.113402	0.143787
1067	1067	0.390822	0.357401	0.0484492	0.0661061	0.0544511	0.0791975	0.147018	0.0119581	0.153496	0.0372472	0.289148	0.0673718	0.211883	0.173514
1068	1068	0.386445	0.278956	0.0443329	0.082725	0.150245	0.124349	0.11577	0.0352748	0.114277	0.0500808	0.347742	0.080258	0.280234	0.232752
1069	1069	0.321853	0.238589	0.0823595	0.0931477	0.0657016	0.162375	0.120942	0.118118	0.092615	0.00902526	0.34813	0.0760076	0.289855	0.225758
1070	1070	0.231211	0.278059	0.010929	0.122907	0.069736	0.111995	0.241608	0.177743	0.0941476	-0.00227167	0.268343	0.0883691	0.229369	0.211354
1071	1071	0.221771	0.29821	-0.0295749	0.124594	0.079504	0.0950635	0.174773	0.106833	0.158151	0.0122177	0.214163	0.0783939	0.155391	0.199213
1072	1072	0.267912	0.280702	-0.00466854	0.119158	0.0514756	0.0802377	0.150442	0.111526	0.1556	0.0190685	0.217567	0.0903883	0.109043	0.218406
1073	1073	0.301872	0.413105	0.0178404	0.0991987	0.0600462	0.0846671	0.191962	0.0944673	0.117702	0.0295181	0.210312	0.0780856	0.108934	0.199741
1074	1074	0.264496	0.372121	0.0009066	0.0692418	0.0976431	0.0798911	0.240613	0.113459	0.100724	0.0254908	0.162707	0.0618205	0.147605	0.285863
1075	1075	0.257936	0.303293	0.0813772	0.0429361	0.104205	0.0743363	0.171752	0.16299	0.0970843	0.0152284	0.106599	0.068793	0.160807	0.350618
1076	1076	0.211196	0.321267	0.0742637	0.027896	0.110092	0.075803	0.110119	0.17445	0.118345	0.0289629	0.177613	0.0832548	0.147359	0.335622
1077	1077	0.214366	0.412364	0.0956036	0.0769748	0.105448	0.0780529	0.131166	0.184051	0.122246	0.020711	0.115994	0.0742249	0.104054	0.266796
1078	1078	0.224859	0.401929	0.0990415	-0.00224219	0.0758988	0.0825417	0.187821	0.181547	0.12347	0.0101134	0.209987	0.0681672	0.0820215	0.253742
1079	1079	0.173913	0.346422	0.0660226	0.0193076	0.0872818	0.0807003	0.165033	0.154193	0.0973919	0.0303942	0.253602	0.0830325	0.094517	0.161059
1080	1080	0.184091	0.327261	0.0967742	0.0561437	0.111897	0.0688539	0.157217	0.104498	0.135719	0.0291143	0.265796	0.0782953	0.100943	0.124597
1081	1081	0.16989	0.337532	0.0678733	0.0282232	0.0622463	0.0781451	0.153457	0.0839213	0.126615	0.0409207	0.172336	0.0783289	0.0836334	0.149155
1082	1082	0.157419	0.308889	0.0862403	0.0579663	0.110746	0.0684011	0.128003	0.0637834	0.139065	0.0269592	0.147473	0.0803109	0.0743836	0.113995
1083	1083	0.151714	0.293312	0.0918137	0.0551364	0.0792033	0.0736753	0.100998	0.0776841	0.185847	0.0447953	0.137311	0.0779055	0.0839921	0.0683309
1084	1084	0.23741	0.325568	0.0635945	0.0579021	0.0541562	0.0923901	0.110125	0.0759453	0.139296	0.0477728	0.12845	0.0760456	0.0769231	0.057903
1085	1085	0.277778	0.326639	0.0395537	0.0426705	0.0124402	0.0789474	0.155575	0.0997343	0.0863309	0.0522999	0.186237	0.0766102	0.0986883	0.0753006
1086	1086	0.222367	0.274025	0.119574	0.047145	-0.0547945	0.0789981	0.149492	0.111402	0.127844	0.0729997	0.0872011	0.0667526	0.0925024	0.0668104
1087	1087	0.219789	0.293466	0.124443	0.0508475	-0.0245311	0.0755613	0.154258	0.197368	0.15851	0.0674548	0.176046	0.081571	0.10015	0.0607091
1088	1088	0.2865	0.293801	0.0768009	0.029597	0.0153238	0.0848273	0.176532	0.157286	0.153509	0.0362573	0.22093	0.109853	0.0884324	0.0809727
1089	1089	0.330189	0.316992	0.0884487	0.0315399	0.036779	0.0795818	0.139041	0.202886	0.122844	0.0302528	0.13691	0.124787	0.120332	0.0749895
1090	1090	0.286917	0.30752	0.0937435	0.0250264	0.0167407	0.0715198	0.103448	0.268437	0.120303	-0.000856913	0.0385818	0.127411	0.127072	0.0836565
1091	1091	0.327314	0.297778	0.11566	0.0538721	0.0563427	0.0823276	0.0305556	0.250518	0.0943789	0.0289362	0.0187266	0.137075	0.115183	0.0764032
1092	1092	0.193992	0.284487	0.176668	0.0412472	0.133743	0.0892665	0.0544772	0.224817	0.152166	0.0270052	0.0451467	0.150855	0.120924	0.0607402
1093	1093	0.23117	0.28655	0.289825	0.0305499	0.0968195	0.0797703	0.0984127	0.174603	0.156891	0.0309989	0.108549	0.174209	0.120187	0.0854916
1094	1094	0.206083	0.355725	0.37368	0.0368304	0.08226	0.0967317	0.0581528	0.164948	0.165869	0.0217899	0.149345	0.163168	0.110155	0.0740464
1095	1095	0.226704	0.369923	0.464449	0.056052	0.165148	0.0929887	0.0349785	0.131737	0.132972	0.0185759	0.115753	0.137471	0.105098	0.074714
1096	1096	0.20395	0.401936	0.425011	0.0483871	0.136296	0.0853684	0.0276785	0.111398	0.0820244	0.025282	0.136924	0.126691	0.0917962	0.0759615
1097	1097	0.212288	0.416847	0.106757	0.083448	0.16411	0.116342	0.0232931	0.166136	0.0850537	0.0366151	0.114953	0.0999344	0.104142	0.0578063
1098	1098	0.186441	0.460674	0.184956	0.0893306	0.183813	0.13368	0.0403481	0.175093	0.105981	0.0265631	0.0641025	0.0727696	0.051989	0.0558576
1099	1099	0.0913852	0.390935	0.259311	0.076683	0.185208	0.168522	0.0609319	0.205705	0.128417	0.00659524	0.0435001	0.092822	0.03518	0.0668797
1100	1100	0.0906171	0.297602	0.253333	0.0771633	0.168865	0.225666	0.0571715	0.15746	0.121124	0.00252311	0.0794148	0.079519	0.0405058	0.0594756
1101	1101	0.119667	0.269398	0.101223	0.0903385	0.146766	0.3008	-0.0260417	0.164706	0.125	-0.0185349	0.0812354	0.0732659	0.0317735	0.144917
1102	1102	0.129965	0.340546	0.102695	0.0732147	0.131177	0.304206	-0.0223979	0.154569	0.109394	-0.0226365	0.0595383	0.0742342	0.0963374	0.20393
1103	1103	0.175716	0.250965	0.106351	0.0694639	0.134222	0.286184	-0.0183357	0.151384	0.134477	-0.0133104	0.0555024	0.0694926	0.13299	0.185817
1104	1104	0.298647	0.266358	0.121123	0.078162	0.131931	0.256869	0.00669345	0.214518	0.152184	-0.00479232	0.0633316	0.0775107	0.107939	0.127264
1105	1105	0.32942	0.290288	0.101802	0.0764818	0.11401	0.271992	0.0174672	0.285857	0.119005	-0.00675944	0.0840012	0.0994512	0.152778	0.114393
1106	1106	0.354089	0.338191	0.0752913	0.0766643	0.104903	0.311617	0.0746988	0.282158	0.175179	-0.0228758	0.0906855	0.0916204	0.123196	0.114738
1107	1107	0.315309	0.369128	0.113936	0.0631068	0.116586	0.310734	0.105471	0.254405	0.192136	-0.00163398	0.0770609	0.0841938	0.105175	0.0850835
1108	1108	0.358187	0.351648	0.0360393	0.0726744	0.117941	0.26347	0.119782	0.240285	0.161	-0.0176174	0.116667	0.0889345	0.0729735	0.116234
1109	1109	0.377617	0.313097	0.0737114	0.0728597	0.106724	0.212792	0.129059	0.251844	0.171214	-0.0114007	0.12362	0.101905	0.0645221	0.104749
1110	1110	0.341506	0.345496	0.102595	0.0497151	0.129338	0.201642	0.0884886	0.239014	0.178589	0.0195139	0.0601719	0.100713	0.0599716	0.110448
1111	1111	0.351589	0.338372	0.0936304	0.0576666	0.115893	0.157695	0.105491	0.165919	0.160998	0.0408514	0.0814857	0.100298	0.0816616	0.0863076
1112	1112	0.339562	0.380865	0.109244	0.0357566	0.123694	0.106752	0.110612	0.128964	0.0915231	0.0509338	0.110962	0.0846279	0.0904967	0.117538
1113	1113	0.282717	0.38013	0.0598352	0.0652215	0.130759	0.092488	0.159949	0.120824	0.0551181	0.0570539	0.13127	0.0891763	0.121864	0.112124
1114	1114	0.328981	0.228195	0.065793	0.0551486	0.136471	0.0699013	0.072997	0.170805	0.100605	0.0724356	0.242376	0.0938603	0.100783	0.113471
1115	1115	0.399386	0.202435	0.0740165	0.0740474	0.0984042	0.069484	0.138011	0.194687	0.150308	0.11176	0.233696	0.0859223	0.092511	0.0824865
1116	1116	0.389091	0.23875	0.0891746	0.0709059	0.0340798	0.0744615	0.166724	0.186228	0.101187	0.068745	0.242604	0.0513458	0.188958	0.110178
1117	1117	0.34087	0.295195	0.0483006	0.0955883	0.00687548	0.0875457	0.147686	0.0963082	0.0572662	0.011646	0.242507	0.0471607	0.212734	0.192262
1118	1118	0.336655	0.203288	0.0503657	0.11779	0.000919979	0.143671	0.220164	0.029443	0.0537322	0.0421639	0.252565	0.0602033	0.195647	0.181607
1119	1119	0.25159	0.290141	0.066087	0.124311	0.0409134	0.174406	0.207997	0.0671442	0.0929305	0.0299559	0.253129	0.0770526	0.238529	0.200291
1120	1120	0.178431	0.271758	-0.0150376	0.11118	0.0585774	0.125549	0.14298	0.127273	0.12236	0.0475276	0.101101	0.0831186	0.21267	0.147782
1121	1121	0.237438	0.26006	-0.0182517	0.124848	0.0932778	0.106733	0.206452	0.128799	0.164842	0.0277659	0.160069	0.0745322	0.1125	0.215399
1122	1122	0.2701	0.365659	-0.00500502	0.100546	0.0876443	0.0889382	0.236258	0.120058	0.115523	0.0339165	0.142857	0.0811502	0.106971	0.164221
1123	1123	0.250267	0.381602	0.0194174	0.0830214	0.0926756	0.0931823	0.154492	0.118233	0.129618	0.0310182	0.108174	0.089297	0.144933	0.165919
1124	1124	0.201557	0.361868	0.0722989	0.0346091	0.0787487	0.0813528	0.133945	0.117554	0.108709	0.0263548	0.136109	0.0830235	0.177106	0.158265
1125	1125	0.22361	0.391362	0.0507297	0.0530672	0.0845955	0.0746073	0.117921	0.129689	0.122522	0.0198111	0.168053	0.0789801	0.134881	0.140376
1126	1126	0.184723	0.419166	0.135475	0.0643003	0.100038	0.0695029	0.138408	0.131881	0.125123	0.0188561	0.180606	0.0840469	0.088	0.117098
1127	1127	0.148796	0.31909	0.10897	-0.00744133	0.0825688	0.0731708	0.147978	0.139955	0.120237	0.0331577	0.110286	0.0889098	0.0772714	0.10567
1128	1128	0.180132	0.236753	0.0924901	0.0494624	0.0869722	0.0743073	0.201782	0.157143	0.133135	0.0219748	0.139557	0.074375	0.0927477	0.0717157
1129	1129	0.126713	0.230227	0.0866025	0.0363636	0.109091	0.0724333	0.149061	0.186383	0.137952	0.0440429	0.200608	0.0612118	0.0827892	0.0844169
1130	1130	0.210652	0.242176	0.107492	0.03708	0.127972	0.0783172	0.138253	0.148557	0.132759	0.0570676	0.236203	0.0527662	0.0829199	0.0728319
1131	1131	0.109582	0.233333	0.0968651	0.0557358	0.100474	0.0839794	0.132796	0.140426	0.153947	0.0294478	0.188654	0.0756972	0.08061	0.0772135
1132	1132	0.13922	0.308505	0.0676651	0.0565323	0.087611	0.0757925	0.110173	0.122208	0.136515	0.0301539	0.190103	0.0901344	0.0900798	0.0787623
1133	1133	0.13414	0.357977	0.0905756	0.0465894	0.086409	0.0747644	0.118483	0.102054	0.0927767	0.0368981	0.144842	0.0804816	0.105705	0.0585015
1134	1134	0.25661	0.4015	0.0838437	0.0490326	0.0261172	0.0689217	0.155556	0.10734	0.103641	0.029734	0.140903	0.0804085	0.111722	0.0689525
1135	1135	0.256853	0.363975	0.0910864	0.0532382	0.0149253	0.0689217	0.141542	0.152617	0.142962	0.0203703	0.160232	0.0906847	0.100054	0.0630452
1136	1136	0.227194	0.330626	0.103258	0.0530259	0.00457457	0.0689728	0.159188	0.169883	0.171454	0.0478873	0.0606742	0.0841751	0.102848	0.0750111
1137	1137	0.261666	0.331027	0.0794581	0.0536258	-0.0070299	0.0899631	0.168668	0.212839	0.209114	0.0758799	0.141586	0.102584	0.0852713	0.0822955
1138	1138	0.262668	0.348288	0.0683617	0.0414776	-0.030859	0.0986537	0.177956	0.223771	0.24244	0.0450085	0.184466	0.12463	0.086388	0.0745771
1139	1139	0.331834	0.319413	0.0806728	0.0305927	-0.00843169	0.0846287	0.130599	0.199048	0.145409	0.0290844	0.119414	0.125222	0.0778055	0.0829823
1140	1140	0.351774	0.307219	0.104208	0.057125	0.00556879	0.0740976	0.0707204	0.195139	0.153509	0.015544	0.0694087	0.129024	0.102041	0.0779321
1141	1141	0.339256	0.268885	0.1124	0.0502861	0.0143603	0.0830822	0.0659748	0.198003	0.150695	0.0153153	0.129003	0.124655	0.105976	0.0571543
1142	1142	0.137192	0.289273	0.272068	0.0570733	0.023622	0.0903942	0.101983	0.248086	0.131881	0.0350877	0.05939	0.117014	0.129123	0.0843644
1143	1143	0.175842	0.305611	0.400073	0.0495781	0.0471591	0.0783312	0.0859924	0.198281	0.19093	0.032392	0.108614	0.13633	0.130847	0.0622466
1144	1144	0.207891	0.319237	0.420185	0.0532198	0.148588	0.0815851	0.0571886	0.145877	0.1608	0.0261866	0.156682	0.158454	0.0941619	0.0675273
1145	1145	0.206515	0.321747	0.345383	0.0572687	0.148666	0.0757289	0.0548876	0.0971484	0.120521	0.0104647	0.151015	0.107496	0.0558031	0.0536154
1146	1146	0.239062	0.345256	0.159066	0.0898955	0.122592	0.0740271	0.016092	0.123238	0.125549	0.0307226	0.0844156	0.0703934	0.0469287	0.0629478
1147	1147	0.17494	0.487453	0.123258	0.0895828	0.159045	0.099912	0.0487706	0.175966	0.128673	0.0260557	0.0651945	0.0782889	0.050889	0.0638409
1148	1148	0.197875	0.457302	0.114461	0.0842507	0.215352	0.121283	0.0649351	0.197911	0.125667	0.00801425	0.0909564	0.0810618	0.0471676	0.0767656
1149	1149	0.109997	0.352467	0.140288	0.0840299	0.189338	0.168511	0.0549944	0.197213	0.127863	-0.00410772	0.131654	0.0993878	0.0615192	0.0780632
1150	1150	0.153493	0.29722	0.0425894	0.0776997	0.140604	0.239398	-0.0456432	0.182952	0.132004	-0.0160897	0.0473202	0.0864625	0.0912738	0.157921
1151	1151	0.110255	0.270713	0.103448	0.0720618	0.135459	0.294055	-0.00423128	0.205816	0.116412	-0.0236372	0.0607245	0.0807663	0.11876	0.175472
1152	1152	0.119038	0.235859	0.0717014	0.0666366	0.146277	0.289061	0.031746	0.196931	0.145929	-0.0117238	0.102863	0.071189	0.105772	0.161565
1153	1153	0.174567	0.234347	0.103042	0.0733884	0.161989	0.204572	0.0368609	0.202354	0.169679	-0.0186582	0.114972	0.0672004	0.114458	0.0924936
1154	1154	0.292814	0.282331	0.0926018	0.068795	0.149779	0.181044	0.0825688	0.255037	0.149673	-0.0208655	0.160425	0.0751598	0.121268	0.168192
1155	1155	0.368868	0.375241	0.0889818	0.0715275	0.148057	0.217738	0.0925373	0.302509	0.110918	-0.0362165	0.105333	0.0850881	0.105571	0.126617
1156	1156	0.386548	0.336768	0.0928382	0.0744581	0.134924	0.290897	0.0775916	0.307769	0.147059	-0.0126472	0.0531202	0.0826884	0.10705	0.096017
1157	1157	0.369438	0.310434	0.0437148	0.0698435	0.116852	0.304632	0.0821668	0.254469	0.122574	-0.0340371	0.0567179	0.0634726	0.0903751	0.117418
1158	1158	0.397956	0.254831	0.0989527	0.0607486	0.123896	0.283745	0.114899	0.199148	0.142251	-0.0161837	0.0618238	0.0846092	0.0740667	0.0607666
1159	1159	0.407527	0.35782	0.103302	0.0482594	0.123792	0.236269	0.139523	0.18003	0.123492	0.0393701	0.0577912	0.109262	0.0437595	0.0868303
1160	1160	0.354964	0.383484	0.116883	0.0557551	0.140233	0.220822	0.187713	0.173993	0.135558	0.0845458	0.134615	0.100665	0.0547883	0.0735435
1161	1161	0.274314	0.352222	0.0767055	0.0494366	0.1451	0.196992	0.150396	0.124209	0.135426	0.032563	0.11713	0.0712521	0.0602744	0.0949352
1162	1162	0.316766	0.299136	0.0651698	0.059255	0.116248	0.148687	0.0909091	0.0884956	0.0675872	0.0274052	0.160514	0.0654628	0.0907612	0.0796386
1163	1163	0.346332	0.246173	0.0890538	0.0432432	0.125749	0.114311	0.0638578	0.0930016	0.0734076	0.0563107	0.16129	0.0820559	0.092511	0.100976
1164	1164	0.398753	0.249288	0.0671972	0.0631604	0.0674582	0.0828753	0.122863	0.160618	0.0950655	0.0564058	0.210404	0.0885278	0.122726	0.111111
1165	1165	0.390112	0.244158	0.0733223	0.081154	0.0347432	0.0674475	0.138035	0.190244	0.0818565	0.0182251	0.220868	0.0885086	0.241972	0.099524
1166	1166	0.328406	0.257426	0.0680299	0.113786	-0.0162602	0.0645753	0.252375	0.191721	0.0334467	0.00542639	0.258346	0.0786193	0.179267	0.121802
1167	1167	0.299875	0.230496	0.0800352	0.102349	-0.0234114	0.0900043	0.270474	0.106184	0.0314743	0.00819674	0.205993	0.0822785	0.114071	0.152179
1168	1168	0.29735	0.291028	0.0503377	0.111635	0.0708546	0.136701	0.184097	0.0952852	0.0604601	0.0095238	0.152	0.0716128	0.106524	0.132513
1169	1169	0.268619	0.244957	-0.0211946	0.103489	0.103819	0.163149	0.144365	0.118665	0.0825064	0.0264993	0.0953846	0.0856423	0.186562	0.0960477
1170	1170	0.25568	0.232333	-0.0114286	0.107832	0.121795	0.117315	0.275174	0.197094	0.14051	-0.005291	0.109838	0.0841709	0.188907	0.137157
1171	1171	0.279337	0.379353	-0.0104862	0.0947704	0.0779274	0.0878034	0.181379	0.117238	0.117592	-0.00767055	0.161845	0.0750163	0.162353	0.0423468
1172	1172	0.202622	0.388098	-0.00846657	0.101559	0.0842349	0.0985985	0.18086	0.107979	0.128529	-0.00510407	0.170202	0.0823606	0.185091	0.0873868
1173	1173	0.162741	0.433457	0.0791139	0.0435311	0.0907786	0.0837231	0.166195	0.112073	0.119878	0.00373136	0.161771	0.0918988	0.162791	0.0726167
1174	1174	0.164919	0.42562	0.0987066	0.0604522	0.0886348	0.0885037	0.13	0.121068	0.111111	0.031462	0.224584	0.086147	0.1107	0.0852774
1175	1175	0.179342	0.361675	0.11495	0.0552878	0.0722243	0.0723698	0.180793	0.139121	0.104242	0.000310468	0.174123	0.0899873	0.101285	0.0920175
1176	1176	0.138784	0.28262	0.128602	0.0326122	0.0773618	0.0659597	0.121387	0.120798	0.135083	0.0123755	0.180656	0.102412	0.127962	0.0855524
1177	1177	0.129395	0.22707	0.0887747	0.0594414	0.112782	0.0635886	0.19906	0.153749	0.119095	0.0203632	0.14683	0.0885385	0.10762	0.055198
1178	1178	0.213426	0.222173	0.0896888	0.024518	0.107999	0.0686316	0.141914	0.168476	0.124222	0.0576177	0.162194	0.0727217	0.0944785	0.0737452
1179	1179	0.136296	0.248761	0.119817	0.0404908	0.122999	0.0722119	0.163652	0.142809	0.106783	0.0861511	0.14832	0.0852665	0.0901849	0.0734209
1180	1180	0.225185	0.230163	0.100891	0.0546306	0.0989441	0.0767586	0.134157	0.132585	0.111742	0.0807681	0.172332	0.07201	0.0784586	0.0887412
1181	1181	0.135065	0.281508	0.106997	0.0542477	0.0971026	0.0795802	0.135017	0.156112	0.11351	0.020944	0.160801	0.0898513	0.0681399	0.07426
1182	1182	0.177553	0.348073	0.0831447	0.0515362	0.0985698	0.0763919	0.123084	0.150105	0.104314	0.0344611	0.131387	0.0883483	0.0831803	0.0709163
1183	1183	0.121348	0.35068	0.0911735	0.0561056	0.0875353	0.0750105	0.186462	0.168696	0.144337	0.0334365	0.152519	0.0914128	0.0932476	0.0746319
1184	1184	0.232361	0.315185	0.0858679	0.0557169	0.0803194	0.0659409	0.145931	0.14849	0.169492	0.0265924	0.0551181	0.0788451	0.0853518	0.0606646
1185	1185	0.176944	0.281991	0.0840074	0.0501078	0.0664356	0.0624868	0.15	0.152174	0.195	0.0489467	0.0520095	0.0784124	0.0869976	0.0760185
1186	1186	0.188851	0.287621	0.117784	0.061413	0.017931	0.0631424	0.107438	0.169669	0.167828	0.0523347	0.10762	0.0901511	0.110828	0.076669
1187	1187	0.255319	0.334116	0.0574237	0.0239504	0.0183267	0.0851383	0.113329	0.189788	0.168608	0.0748434	0.164306	0.103505	0.0950319	0.0683168
1188	1188	0.278054	0.314444	0.0304017	0.0307738	-0.0183575	0.0762407	0.102427	0.21457	0.171542	0.0372556	0.162646	0.0993378	0.080884	0.0769231
1189	1189	0.305298	0.291987	0.00529098	0.0559713	-0.0276008	0.0761356	0.0906878	0.219911	0.157698	0.0219405	0.0857143	0.102781	0.106501	0.075368
1190	1190	0.292308	0.277514	0.046532	0.0646135	-0.0198953	0.0805526	0.0800562	0.174022	0.138355	0.0219885	0.110497	0.0879003	0.120739	0.0618374
1191	1191	0.295073	0.287657	0.0818505	0.0620333	0.00902705	0.0815007	0.151335	0.210678	0.132461	0.0357143	0.103406	0.0987523	0.118159	0.0709404
1192	1192	0.148804	0.276161	0.190588	0.0452903	0.0569715	0.0948369	0.100245	0.246753	0.149892	0.0179274	0.168996	0.133365	0.115813	0.0573811
1193	1193	0.21766	0.28128	0.192563	0.0442953	0.127214	0.0912198	0.0735022	0.195489	0.116732	0.0160142	0.0885102	0.129278	0.10408	0.0686827
1194	1194	0.20742	0.267142	0.216368	0.0560042	0.161049	0.0703454	0.0673077	0.16218	0.141982	0.0152284	0.103418	0.0878038	0.0630631	0.0799307
1195	1195	0.240779	0.300045	0.139159	0.077109	0.16344	0.0697674	0.016317	0.171006	0.144371	0.0251163	0.118297	0.0681452	0.0653053	0.0794125
1196	1196	0.190682	0.3618	0.0907504	0.08	0.166963	0.0811042	0.0453001	0.176834	0.113829	0.0128713	0.0909091	0.0669589	0.0735004	0.0730829
1197	1197	0.190555	0.452911	0.118859	0.0907429	0.161074	0.0905538	0.114611	0.185382	0.0956603	-0.0147583	0.0984508	0.0848869	0.0648489	0.0655066
1198	1198	0.142857	0.400102	0.121118	0.0759275	0.208504	0.114069	0.0647182	0.163677	0.145982	-0.00838677	0.121266	0.102518	0.0893648	0.0712025
1199	1199	0.12343	0.303337	0.137868	0.0627459	0.217949	0.172095	-0.0387812	0.17017	0.149749	-0.0140698	0.119829	0.0874848	0.09843	0.152645
1200	1200	0.119858	0.247715	0.136091	0.0642903	0.156517	0.24745	0.00393187	0.193562	0.183674	-0.017387	0.127654	0.0740592	0.0839695	0.132625
1201	1201	0.132248	0.260163	0.0589367	0.0599472	0.151766	0.287351	0.060606	0.220496	0.19045	-0.00362318	0.133333	0.0638978	0.121322	0.129659
1202	1202	0.14433	0.26087	0.0923151	0.059287	0.124565	0.246801	0.0679934	0.2559	0.162103	-0.0195426	0.106943	0.07828	0.10301	0.113542
1203	1203	0.308336	0.275	0.0940456	0.0573248	0.1208	0.158834	0.0759036	0.241247	0.177155	-0.00271422	0.0862735	0.0853183	0.098384	0.150244
1204	1204	0.414232	0.28	0.102308	0.0675446	0.145545	0.139887	0.0763092	0.223125	0.133023	-0.0251955	0.0614786	0.0733236	0.0932876	0.126592
1205	1205	0.368746	0.292624	0.0934778	0.0678441	0.152534	0.148077	0.0605381	0.259583	0.146636	-0.0199734	0.04811	0.0679066	0.0995204	0.116825
1206	1206	0.355975	0.257757	0.104554	0.0761671	0.153792	0.237469	0.127717	0.202538	0.12153	-0.0172345	0.0824499	0.072608	0.108157	0.0831663
1207	1207	0.332345	0.222222	0.107942	0.0419385	0.154072	0.27913	0.0887574	0.171963	0.146094	0.00664569	0.101673	0.0845727	0.0945499	0.0705528
1208	1208	0.324485	0.328692	0.111621	0.0532925	0.14993	0.255084	0.103086	0.125778	0.155722	0.0386495	0.109193	0.0981786	0.0684763	0.0882413
1209	1209	0.293817	0.328446	0.0587792	0.0569771	0.121673	0.27337	0.189563	0.103026	0.159897	0.108467	0.167321	0.0943396	0.0901739	0.0792244
1210	1210	0.233762	0.273367	0.0609518	0.0556883	0.13984	0.254588	0.161652	0.0907933	0.18232	-0.0640913	0.145842	0.0763037	0.0913859	0.0951464
1211	1211	0.197662	0.252847	0.0790476	0.0632649	0.100783	0.219869	0.162769	0.106915	0.150045	0.0146956	0.157398	0.059327	0.0992136	0.0855089
1212	1212	0.252422	0.270758	0.0861559	0.0614132	0.0634402	0.174513	0.107704	0.130708	0.0463741	0.0126861	0.161566	0.0839973	0.113098	0.101045
1213	1213	0.285677	0.273458	0.0453185	0.0806689	0.00813005	0.131628	0.0672269	0.166557	0.0835107	-0.02889	0.157514	0.0932755	0.174117	0.0799413
1214	1214	0.31191	0.293726	0.0684221	0.0989685	-0.0369565	0.0916523	0.110263	0.192154	0.0689193	-0.00370523	0.215959	0.099667	0.1257	0.107955
1215	1215	0.254735	0.223895	0.0667456	0.116712	0.00111984	0.0662589	0.261967	0.177831	0.0206128	-0.00460472	0.199041	0.0851113	0.112682	0.0840443
1216	1216	0.228981	0.231643	0.0849195	0.109139	0.0228013	0.0634953	0.188671	0.17907	0.0120347	0.0839568	0.180116	0.0784181	0.0959094	0.0959854
1217	1217	0.236	0.273214	0.0326296	0.111245	0.125065	0.0882905	0.216558	0.120595	0.0411862	0.0505515	0.128866	0.0762921	0.117312	0.106466
1218	1218	0.237545	0.249776	-0.0082949	0.115646	0.100223	0.131308	0.171619	0.0906096	0.0570006	0.0014306	0.121479	0.0762195	0.148631	0.180744
1219	1219	0.212304	0.207444	0.0392157	0.101416	0.117045	0.159139	0.199667	0.225225	0.0878706	0.037234	0.096875	0.0796081	0.109607	0.0770179
1220	1220	0.204257	0.424658	0.0545775	0.108378	0.0984285	0.121107	0.186087	0.165724	0.109162	-0.002991	0.113534	0.0803879	0.112224	0.0623089
1221	1221	0.168753	0.495354	-0.0181818	0.0962072	0.0824823	0.0893128	0.207912	0.106124	0.129467	-0.0143541	0.166432	0.0927703	0.148621	0.0728333
1222	1222	0.156692	0.465492	0.0604438	0.0431321	0.0828897	0.102481	0.152995	0.0844268	0.112321	-0.00589254	0.123884	0.101506	0.11655	0.0615232
1223	1223	0.172549	0.438131	0.12127	0.0715785	0.0776021	0.0921986	0.101449	0.103743	0.0969882	0.015138	0.177638	0.0874282	0.125489	0.116507
1224	1224	0.180812	0.336544	0.137912	0.046777	0.0745826	0.0847846	0.131058	0.147164	0.113868	0.0361582	0.128527	0.0944462	0.0956641	0.117609
1225	1225	0.175191	0.272019	0.12176	0.0504991	0.0872727	0.0733707	0.141219	0.143416	0.147172	-0.00548112	0.186047	0.107597	0.0812604	0.0902792
1226	1226	0.169839	0.26072	0.109875	0.0536544	0.109392	0.0768901	0.183455	0.142066	0.119913	0.0401136	0.183862	0.113784	0.0778596	0.0780813
1227	1227	0.218855	0.294886	0.0756557	0.0361213	0.110065	0.0714897	0.169244	0.150752	0.129964	0.0977979	0.20603	0.0972691	0.0930893	0.0787419
1228	1228	0.164645	0.309195	0.0825877	0.0452611	0.0965435	0.0661529	0.209025	0.206041	0.134912	0.109722	0.156194	0.076414	0.10445	0.0888837
1229	1229	0.122862	0.238892	0.0841151	0.0421687	0.0809317	0.0699228	0.111111	0.173263	0.112948	0.168943	0.176863	0.075179	0.0969325	0.0831404
1230	1230	0.0714286	0.310231	0.108352	0.060219	0.0748299	0.0696367	0.123091	0.169456	0.164448	0.0102951	0.180113	0.0747398	0.0896806	0.0725707
1231	1231	0.161184	0.329121	0.0910428	0.0557345	0.0774935	0.0746333	0.100292	0.185586	0.139518	0.0477988	0.151248	0.0747375	0.105457	0.0626101
1232	1232	0.301932	0.334437	0.0973504	0.0433862	0.0822669	0.0710059	0.138426	0.244044	0.1514	0.0247934	0.155816	0.0749129	0.0993915	0.0759839
1233	1233	0.243333	0.328068	0.100766	0.0649849	0.0733182	0.0712022	0.124324	0.208333	0.167128	0.0357827	0.0829268	0.0678211	0.0951604	0.0716094
1234	1234	0.232964	0.329717	0.115181	0.0632054	0.0878627	0.0701754	0.0880767	0.156265	0.178019	0.0527687	0.0212202	0.07029	0.101901	0.0747886
1235	1235	0.272727	0.263593	0.120283	0.0441054	0.0526802	0.0807823	0.158523	0.195448	0.187838	0.0367002	0.04	0.0640316	0.101572	0.0657769
1236	1236	0.259554	0.239793	0.119915	0.028748	0.0316901	0.0792501	0.110999	0.212468	0.157464	0.0920488	0.0928854	0.0843905	0.0966893	0.0803949
1237	1237	0.284491	0.234954	0.0957563	0.0356653	0.0474383	0.0756411	0.108769	0.238206	0.131328	0.0394688	0.0836576	0.0829362	0.093937	0.0710355
1238	1238	0.285714	0.237781	0.0907187	0.0529101	0.0530612	0.0723963	0.0916031	0.2139	0.13654	0.021425	0.0795262	0.0736072	0.0992126	0.0739065
1239	1239	0.277739	0.290686	0.0819047	0.0633684	-0.00916138	0.0822122	0.0390738	0.166957	0.154189	0.0132809	0.0795215	0.0716259	0.0952839	0.0736579
1240	1240	0.306273	0.296084	0.0961145	0.0449967	-0.000873377	0.0843845	0.0376776	0.167427	0.131675	0.0177118	0.061742	0.104354	0.0980835	0.067711
1241	1241	0.130922	0.292026	0.0910125	0.0439594	-0.0292307	0.0791952	0.0687623	0.193248	0.123299	0.0338491	0.118816	0.12209	0.104008	0.0709876
1242	1242	0.26691	0.26638	0.0744249	0.0475667	0.142857	0.0834408	0.0680147	0.237772	0.127487	0.0233947	0.108153	0.0859476	0.106594	0.0780324
1243	1243	0.198667	0.268085	0.139274	0.0458291	0.140911	0.085992	-0.0451237	0.270753	0.119326	0.0426921	0.114379	0.0633663	0.0597311	0.0737787
1244	1244	0.202987	0.305092	0.151549	0.0842105	0.126136	0.0732418	-0.0893617	0.166966	0.107813	0.0288227	0.176577	0.0665661	0.100026	0.0727682
1245	1245	0.208982	0.288525	0.128405	0.0784362	0.134454	0.0973871	-0.118848	0.179092	0.0997543	0.00810374	0.110074	0.0605828	0.123499	0.0665323
1246	1246	0.234708	0.425337	0.129589	0.0820639	0.0929181	0.104267	0.122132	0.198868	0.114527	-0.011898	0.114989	0.0784749	0.135264	0.0707171
1247	1247	0.232422	0.365328	0.110836	0.0739977	0.0888626	0.132412	0.0743494	0.200725	0.214252	-0.00265253	0.0742857	0.0896101	0.100354	0.0720285
1248	1248	0.137708	0.273157	0.131034	0.0687893	0.0934685	0.22	0.00118061	0.149847	0.146067	0.0134626	0.113218	0.0883227	0.105378	0.144168
1249	1249	0.113966	0.261894	0.0703987	0.0550919	0.111002	0.26502	0.110228	0.179909	0.185143	-0.00203252	0.150097	0.0814233	0.114437	0.141921
1250	1250	0.122227	0.251137	0.0920578	0.0494617	0.154409	0.256604	0.100337	0.203338	0.163445	0.0181106	0.103183	0.0732828	0.107298	0.0834109
1251	1251	0.136148	0.249197	0.0383602	0.045573	0.168454	0.247786	0.127208	0.238232	0.186116	-0.00497965	0.0664565	0.0693423	0.0874219	0.11288
1252	1252	0.259139	0.247499	0.0785441	0.0514509	0.162342	0.199384	0.0848441	0.230089	0.156511	0.00540993	0.0767455	0.0718024	0.0917197	0.0920213
1253	1253	0.302033	0.258375	0.0921701	0.049744	0.15187	0.129383	0.0822016	0.169585	0.130533	-0.0194175	0.13623	0.0795986	0.112555	0.109364
1254	1254	0.276865	0.269663	0.152147	0.0452629	0.126344	0.130329	0.0955463	0.178002	0.149867	-0.0170195	0.158364	0.0834161	0.0983392	0.094431
1255	1255	0.272528	0.235085	0.100474	0.0638158	0.120077	0.161181	0.0614625	0.141494	0.150568	0.00311769	0.135299	0.0828325	0.111485	0.0870505
1256	1256	0.196734	0.222408	0.110584	0.0412618	0.106489	0.175928	0.0683544	0.128167	0.196862	-0.000951491	0.117933	0.0828204	0.0746037	0.0966635
1257	1257	0.193802	0.266696	0.144478	0.059374	0.148996	0.167198	0.0875831	0.112011	0.162701	-0.000785501	0.154192	0.0895086	0.0514514	0.0889498
1258	1258	0.205238	0.242546	0.0373588	0.0587186	0.118935	0.239347	0.162714	0.105136	0.151269	-0.042471	0.117534	0.078534	0.119927	0.0885082
1259	1259	0.191962	0.267087	0.0759682	0.0753789	0.0938075	0.278625	0.160724	0.0939504	0.161473	-0.0567316	0.174735	0.0731394	0.112287	0.0889979
1260	1260	0.144377	0.301042	0.0746061	0.0923445	0.0242326	0.232863	0.203211	0.130939	0.131568	-0.00881356	0.133942	0.0627336	0.131495	0.082649
1261	1261	0.129741	0.271777	0.077952	0.0737826	0.00104714	0.189323	0.187901	0.131363	0.0935673	-0.0107858	0.202391	0.0944188	0.156415	0.0856693
1262	1262	0.140936	0.285714	0.0656224	0.115074	-0.0109409	0.149976	0.10609	0.165055	0.0759601	-0.00140644	0.158891	0.0806154	0.132384	0.091422
1263	1263	0.162952	0.276694	0.081407	0.116496	0.00872939	0.102198	0.13928	0.183226	0.0565343	-0.00262236	0.2313	0.101953	0.119903	0.0958195
1264	1264	0.171954	0.272315	0.0272308	0.127202	0.0746269	0.0790718	0.230155	0.201183	0.038307	0.00113768	0.170966	0.0998422	0.142857	0.0623904
1265	1265	0.162967	0.267706	0.0725942	0.125514	0.117434	0.0660703	0.121792	0.218215	0.0181818	0.135812	0.187388	0.0960776	0.0955859	0.0630903
1266	1266	0.157039	0.24906	0.023676	0.113369	0.120773	0.0641822	0.161713	0.206424	0.0171204	0.127451	0.128354	0.0913797	0.0895571	0.10855
1267	1267	0.122672	0.263925	0.028133	0.0880334	0.0925926	0.11318	0.183751	0.142359	0.0336566	0.00504817	0.0808753	0.0608331	0.113708	0.150627
1268	1268	0.163626	0.234543	-0.00531914	0.105081	0.0920097	0.138862	0.165401	0.129805	0.050455	0.0456496	0.0621558	0.0685424	0.110826	0.094589
1269	1269	0.163506	0.342297	0.0948207	0.112156	0.0927258	0.112126	0.183691	0.128889	0.0734525	-0.00690845	0.0735587	0.0763197	0.108626	0.0946637
1270	1270	0.163321	0.403061	0.0551181	0.0719237	0.0932704	0.111044	0.17915	0.0898908	0.1353	0.00684348	0.15438	0.0820081	0.0766917	0.0774054
1271	1271	0.219216	0.390547	0.0824926	0.0382807	0.077278	0.0953327	0.0919056	0.0719101	0.0945674	-0.0121816	0.0331675	0.0918988	0.0924609	0.0610228
1272	1272	0.261147	0.347686	0.0969697	0.0594446	0.0647103	0.0807684	0.0812371	0.0794093	0.0992602	0.0143713	0.0623377	0.0873041	0.0976237	0.129091
1273	1273	0.225657	0.346744	0.107416	0.0478602	0.0711044	0.0894569	0.081524	0.105278	0.125525	-0.0210136	0.0809827	0.090624	0.0931448	0.125755
1274	1274	0.24336	0.295633	0.107195	0.0801589	0.0700361	0.0806167	0.0927258	0.131651	0.080633	-0.0248796	0.14003	0.103276	0.0989824	0.0842302
1275	1275	0.244992	0.288117	0.0954387	0.0595305	0.0801987	0.0751718	0.112044	0.14044	0.121135	0.014978	0.0974539	0.0951784	0.0962634	0.0655083
1276	1276	0.12253	0.284905	0.106443	0.047482	0.0914634	0.0792309	0.147421	0.157059	0.123855	0.112737	0.173239	0.0965156	0.092437	0.0667291
1277	1277	0.141791	0.274672	0.0836544	0.0478155	0.0796956	0.0860099	0.201047	0.172058	0.131425	0.0827116	0.166667	0.0918887	0.101531	0.0706355
1278	1278	0.172549	0.309948	0.105642	0.0484	0.0725206	0.0748709	0.119457	0.136189	0.151561	0.0728229	0.146119	0.0736903	0.0821374	0.0707965
1279	1279	0.20708	0.327051	0.100014	0.0476812	0.0646221	0.0782051	0.146643	0.18903	0.168362	0.0264475	0.151	0.0702264	0.0916977	0.079683
1280	1280	0.169355	0.333714	0.0916772	0.0611836	0.0695683	0.0647359	0.128511	0.213357	0.134469	0.0106831	0.165244	0.0650785	0.0992509	0.0620715
1281	1281	0.141631	0.367335	0.094224	0.0554503	0.0740078	0.076857	0.118153	0.163516	0.154989	0.0203423	0.201465	0.0659505	0.0974602	0.0681149
1282	1282	0.138976	0.317365	0.0970115	0.0584288	0.0878691	0.0856778	0.109292	0.172107	0.178389	0.0341463	0.100427	0.0706767	0.119201	0.0516283
1283	1283	0.268817	0.328767	0.0948122	0.0493792	0.0945274	0.0863617	0.0739372	0.186375	0.155816	0.0622907	0.0478469	0.0757208	0.113217	0.0720155
1284	1284	0.260173	0.282705	0.0968063	0.0228963	0.0813102	0.0820578	0.107794	0.220507	0.146524	0.0420224	0.0013038	0.0709746	0.0830057	0.0867257
1285	1285	0.236133	0.266958	0.103294	0.0419443	0.074805	0.0751669	0.0952029	0.227807	0.168932	0.0569477	0.0843373	0.0720207	0.0924784	0.079573
1286	1286	0.241379	0.249877	0.101891	0.0470446	0.0883219	0.065333	0.0893913	0.250473	0.127492	0.0573026	0.0766246	0.0711679	0.128047	0.0598772
1287	1287	0.224959	0.184466	0.0975057	0.0320335	0.0909091	0.0826285	0.0878167	0.197908	0.113848	0.0441335	0.104972	0.0747103	0.145809	0.0832033
1288	1288	0.267717	0.264073	0.081018	0.0511001	0.0566649	0.0850465	0.0854504	0.159751	0.111025	0.0354767	0.0801249	0.0821997	0.134927	0.0850267
1289	1289	0.108095	0.265491	0.0661654	0.0477463	0.0777027	0.0777224	0.150745	0.157224	0.144674	0.0533408	0.0723514	0.109534	0.110096	0.0764033
1290	1290	0.205924	0.206955	0.0902619	0.0479928	0.0689656	0.0785989	0.162493	0.242312	0.151466	0.020567	0.0827133	0.0807701	0.100764	0.0742268
1291	1291	0.151818	0.258651	0.132611	0.0471645	0.123779	0.075328	0.0491803	0.286007	0.104587	0.0428422	0.137856	0.0642344	0.101807	0.0686199
1292	1292	0.25081	0.273359	0.111559	0.0450638	0.135643	0.0702957	-0.129296	0.244477	0.0801869	0.0194225	0.166903	0.0536399	0.0879512	0.0676806
1293	1293	0.258022	0.266205	0.133244	0.0810811	0.119824	0.0947276	-0.0845295	0.232323	0.0890323	0.0372178	0.162384	0.0570605	0.0929923	0.0643275
1294	1294	0.156065	0.267373	0.0645294	0.0586655	0.153613	0.105872	-0.0845295	0.170897	0.0994152	0.0318302	0.120869	0.0761829	0.128165	0.0645002
1295	1295	0.181454	0.395961	0.11553	0.0582591	0.149767	0.161509	0.122078	0.177267	0.128372	0.00188327	0.150417	0.0814783	0.0973051	0.0676954
1296	1296	0.150166	0.333023	0.0909675	0.0452822	0.146914	0.227211	0.0298165	0.20855	0.170931	0.0139647	0.18635	0.0640612	0.0983756	0.0649014
1297	1297	0.142651	0.278224	0.117107	0.0609634	0.10402	0.221146	0.0542099	0.129889	0.131469	-0.00172512	0.106659	0.0992367	0.124071	0.122086
1298	1298	0.111623	0.240228	0.0809879	0.0526496	0.0954575	0.232357	0.100061	0.140164	0.146919	0.0143236	0.0657327	0.0986579	0.0957653	0.0789924
1299	1299	0.148266	0.195323	0.0887903	0.0541162	0.0603942	0.25523	0.145655	0.201426	0.18593	-0.000472339	0.0847079	0.0639589	0.0860555	0.0867126
1300	1300	0.284111	0.227995	0.0245983	0.0509623	0.0583757	0.229399	0.100035	0.165187	0.210663	0.00841823	0.123061	0.0574182	0.102232	0.109558
1301	1301	0.220019	0.230769	0.0649351	0.0506227	0.0778233	0.144847	0.0949683	0.184131	0.213153	-0.0268232	0.103964	0.0833334	0.0865329	0.0853774
1302	1302	0.199904	0.202572	0.0999075	0.0586667	0.124657	0.115055	0.0919349	0.139858	0.176542	0.00868881	0.145323	0.0961098	0.0986476	0.084649
1303	1303	0.172714	0.211044	0.14638	0.0646193	0.19479	0.126834	0.0697211	0.091982	0.149375	-0.000445045	0.192154	0.0928144	0.109345	0.0829539
1304	1304	0.145064	0.229117	0.12116	0.069127	0.174038	0.128624	0.0735294	0.0973276	0.183121	0.00296296	0.181139	0.076969	0.124195	0.0911528
1305	1305	0.145533	0.218873	0.0978093	0.0510578	0.0995826	0.129161	0.0906188	0.112096	0.226608	-0.0503716	0.172834	0.0903485	0.131013	0.0981371
1306	1306	0.150359	0.241942	0.0987693	0.0591677	0.0572438	0.197163	0.116377	0.141636	0.159387	-0.030796	0.140318	0.0898361	0.104727	0.075627
1307	1307	0.1561	0.237664	0.0489549	0.0543245	0.0222222	0.285415	0.109408	0.125605	0.148667	-0.0234216	0.194064	0.0783357	0.184702	0.124508
1308	1308	0.186906	0.331899	0.0779522	0.0893655	0.0328042	0.245728	0.109952	0.105191	0.146741	0.0108803	0.0655226	0.0834093	0.190657	0.0906327
1309	1309	0.171952	0.318727	0.0875823	0.109521	0.0159405	0.220482	0.158087	0.147959	0.118437	0.00633274	0.125838	0.0721691	0.144947	0.0882784
1310	1310	0.14771	0.220339	0.0696905	0.0784578	0.0373206	0.180854	0.173148	0.13879	0.147704	0.0466884	0.139286	0.0804472	0.109928	0.0789615
1311	1311	0.14859	0.259628	0.0706416	0.10799	0.0618941	0.141213	0.166514	0.176115	0.098172	0.00566802	0.186801	0.0748006	0.0942335	0.0866311
1312	1312	0.178622	0.248818	0.0721692	0.117766	0.0835214	0.0973132	0.187612	0.162145	0.067806	-0.00760046	0.130072	0.0874216	0.0606676	0.0754148
1313	1313	0.176581	0.301435	0.024473	0.116071	0.0963517	0.0800514	0.153916	0.156889	0.0368082	0.0983664	0.190055	0.0995523	0.0852982	0.0664664
1314	1314	0.20195	0.279754	0.10464	0.105696	0.102287	0.0742095	0.14433	0.18234	0.0340099	0.14595	0.0963244	0.0820823	0.147191	0.0609062
1315	1315	0.184202	0.245217	0.0188255	0.101716	0.108394	0.104424	0.177465	0.210182	0.00420524	0.0280374	0.0708661	0.0799379	0.120695	0.0975169
1316	1316	0.198122	0.264856	0.0161443	0.0780603	0.0936186	0.132483	0.132365	0.165254	0.0163558	0.038687	0.0552612	0.0676923	0.0905023	0.0937093
1317	1317	0.208174	0.212641	0.00272477	0.109522	0.100309	0.0986373	0.145989	0.085918	0.0110401	0.0254958	0.0720358	0.059729	0.0900671	0.0930183
1318	1318	0.233409	0.353791	0.0874636	0.0703695	0.0857143	0.105796	0.154125	0.0449438	0.0462138	0.0436836	0.148441	0.0783582	0.124729	0.0921577
1319	1319	0.230969	0.365825	0.0960809	0.042654	0.0829623	0.0984885	0.104007	0.0606153	0.146683	0.0206513	0.0411523	0.0852469	0.113721	0.0959085
1320	1320	0.251076	0.267576	0.130317	0.0482445	0.0710295	0.0911622	0.0772408	0.0868857	0.0996334	0.0200551	-0.0174927	0.087202	0.130021	0.0814542
1321	1321	0.274074	0.317345	0.136758	0.0525127	0.0768025	0.0832221	0.0881738	0.0530232	0.123796	-0.0223593	0.0174757	0.0945273	0.103262	0.104954
1322	1322	0.193642	0.334526	0.0960984	0.091024	0.0726048	0.0743544	0.0776294	0.0718138	0.122198	-0.0262203	0.150635	0.0976286	0.101645	0.119156
1323	1323	0.161172	0.282474	0.0949981	0.095057	0.0627254	0.0824281	0.0752688	0.109195	0.118225	0.0187144	0.0722101	0.0937697	0.0998269	0.0837175
1324	1324	0.193738	0.223507	0.109317	0.0580067	0.0883315	0.0845445	0.0850679	0.118889	0.130965	0.025903	0.147839	0.0976071	0.095958	0.0677559
1325	1325	0.166973	0.27477	0.1092	0.057286	0.0947527	0.086189	0.0783277	0.112948	0.125364	0.0241546	0.120287	0.0980153	0.0950311	0.0671345
1326	1326	0.267951	0.315422	0.100382	0.0407569	0.068708	0.0753247	0.133099	0.141217	0.110182	0.0398158	0.137466	0.0746626	0.0951792	0.0656625
1327	1327	0.261944	0.290323	0.094984	0.0330532	0.0691824	0.0746844	0.163347	0.169053	0.122433	0.0326895	0.17214	0.0722892	0.0872606	0.0713781
1328	1328	0.0956679	0.272534	0.102863	0.0293062	0.0713246	0.0685739	0.107874	0.25552	0.140125	0.00552484	0.169058	0.065742	0.090399	0.0673928
1329	1329	0.147952	0.325708	0.107329	0.0661235	0.0674716	0.0831897	0.074558	0.273095	0.156447	0.0215264	0.180654	0.056042	0.100675	0.062445
1330	1330	0.204063	0.360898	0.105995	0.0662272	0.0717392	0.0869101	0.107199	0.231514	0.147657	0.0427461	0.168036	0.0602337	0.127618	0.0800364
1331	1331	0.250493	0.288986	0.0969807	0.0580949	0.0801718	0.0711995	0.101951	0.156966	0.161889	0.0568031	0.0924512	0.0558723	0.122543	0.0538138
1332	1332	0.280551	0.224199	0.0874891	0.0453731	0.0882957	0.0819031	0.103378	0.210566	0.162931	0.0512738	0.00442477	0.0660277	0.0948428	0.0840231
1333	1333	0.192913	0.279017	0.0915513	0.0263073	0.0615183	0.0804993	0.099755	0.229572	0.131783	0.062399	0.0325123	0.0720201	0.0898146	0.0806175
1334	1334	0.133603	0.261511	0.0833692	0.0399649	0.0508827	0.0676884	0.0921875	0.22467	0.146678	0.0600331	0.0595555	0.0697674	0.0974244	0.0631579
1335	1335	0.165644	0.191792	0.0876274	0.0384337	0.043364	0.084435	0.0966899	0.299492	0.103596	0.0226804	0.0419948	0.0691205	0.118615	0.0762053
1336	1336	0.232323	0.211719	0.0930001	0.02859	0.0209713	0.0811158	0.0868347	0.144869	0.105112	0.0426997	-0.0536193	0.0815101	0.102941	0.0783338
1337	1337	0.0760394	0.230325	0.0962234	0.0532506	0.0586354	0.0834618	0.0996603	0.0789793	0.162224	0.0702341	0.0944528	0.0728285	0.116025	0.09595
1338	1338	0.166188	0.22499	0.0875544	0.0476487	0.0925033	0.0721297	0.122349	0.134111	0.156468	0.0125156	0.0987167	0.0619341	0.100161	0.0803074
1339	1339	0.166988	0.233771	0.0742358	0.0490029	0.0683945	0.0743661	0.00437958	0.203166	0.0982107	0.00567538	0.11871	0.0637291	0.100557	0.0805248
1340	1340	0.219667	0.262411	0.0622502	0.0432403	0.119653	0.0761443	-0.0926217	0.254314	0.0765606	0.0240889	0.128631	0.0544774	0.0974212	0.0669424
1341	1341	0.194754	0.282855	0.0367647	0.0437349	0.130268	0.0989011	-0.106036	0.209486	0.0813528	0.0415755	0.174213	0.0489192	0.111111	0.0701847
1342	1342	0.163487	0.290901	0.0543294	0.049369	0.133242	0.122042	-0.127946	0.21862	0.0930713	0.00973783	0.131424	0.0642555	0.0914517	0.065578
1343	1343	0.209746	0.356765	0.0613823	0.0603291	0.126564	0.186302	0.127459	0.208539	0.101092	-0.00286123	0.0781768	0.0697163	0.0827196	0.0723553
1344	1344	0.13498	0.372104	0.0907127	0.0481463	0.124603	0.223897	0.0210084	0.16066	0.131041	0.00355873	0.143475	0.0626233	0.103618	0.0683198
1345	1345	0.141753	0.352798	0.067557	0.0618067	0.101749	0.219137	0.0546697	0.125926	0.169877	-0.0207962	0.0918663	0.0892098	0.11213	0.0696903
1346	1346	0.128238	0.262084	0.105026	0.0449307	0.131707	0.263286	0.124922	0.106383	0.189364	0.0174793	0.0751136	0.0959418	0.110147	0.0782833
1347	1347	0.16712	0.242096	0.0802811	0.0908452	0.144793	0.253378	0.166431	0.145078	0.25974	-0.0087789	0.151495	0.0704972	0.100572	0.106503
1348	1348	0.265992	0.218522	0.104615	0.0818692	0.128675	0.233781	0.156572	0.163997	0.217703	0.0116279	0.160187	0.0572588	0.0844801	0.0796124
1349	1349	0.236265	0.250493	0.102842	0.0833676	0.105602	0.181501	0.190859	0.122581	0.152601	-0.0170567	0.170099	0.0853728	0.0873048	0.0938381
1350	1350	0.199315	0.195899	0.0936819	0.0947776	0.103272	0.130453	0.180073	0.144437	0.166889	0.0494297	0.173415	0.0835876	0.127939	0.0783993
1351	1351	0.165951	0.196337	0.150114	0.0933973	0.122788	0.13451	0.147149	0.132367	0.166942	-0.011583	0.139983	0.0854777	0.137164	0.0907637
1352	1352	0.129184	0.237862	0.151809	0.0831993	0.14875	0.131255	0.126984	0.11498	0.206764	-0.0253599	0.210366	0.079646	0.191797	0.093508
1353	1353	0.157278	0.217319	0.13135	0.0648648	0.123863	0.137918	0.0723346	0.128329	0.2	-0.0507919	0.167908	0.0657861	0.141836	0.105398
1354	1354	0.156322	0.231314	0.110578	0.081037	0.0664532	0.18333	0.062302	0.135966	0.138226	-0.00326342	0.16129	0.0884389	0.126959	0.123805
1355	1355	0.165641	0.255172	0.0844342	0.0748393	0.0356473	0.253027	0.121841	0.144287	0.13213	-0.0328079	0.191257	0.0812738	0.106811	0.0928445
1356	1356	0.225079	0.274756	0.0698056	0.097904	0.0321396	0.291917	0.203299	0.142857	0.154274	-0.033955	0.0613208	0.0733319	0.123487	0.0813868
1357	1357	0.255227	0.24577	0.106442	0.0880649	0.0558912	0.259452	0.176877	0.137546	0.144402	-0.0252824	0.131741	0.0787712	0.127914	0.0643932
1358	1358	0.126617	0.235552	0.0816916	0.0732002	0.0785877	0.196229	0.187832	0.145235	0.162945	0.0704762	0.147666	0.076101	0.120069	0.0892475
1359	1359	0.21424	0.252054	0.0947867	0.0811166	0.0974265	0.155264	0.152743	0.159315	0.173423	-0.0168955	0.160023	0.0809717	0.130292	0.0942376
1360	1360	0.226409	0.243221	0.0582997	0.110886	0.120134	0.11331	0.148467	0.182585	0.101377	-0.0240718	0.131034	0.0913274	0.12132	0.086713
1361	1361	0.234515	0.257624	0.0603354	0.114543	0.109188	0.0845987	0.208198	0.163121	0.0530053	0.0222861	0.196398	0.0833485	0.0932704	0.0712089
1362	1362	0.192214	0.267571	-0.00692257	0.102899	0.0808123	0.0797782	0.215594	0.179968	0.0477894	0.15973	0.120567	0.08122	0.111181	0.0838178
1363	1363	0.254237	0.229091	0.0968349	0.0907366	0.113589	0.0973993	0.177446	0.204596	0.0158135	0.10568	0.0902579	0.0877565	0.111402	0.0852787
1364	1364	0.24196	0.209123	-0.0291439	0.0833569	0.09537	0.119445	0.0833333	0.214099	0.00282168	0.0412603	0.0469314	0.0720339	0.101359	0.09274
1365	1365	0.222482	0.326857	0.0624551	0.0691824	0.0959223	0.102053	0.109073	0.163039	0.00936701	0.0207006	0.0685155	0.0708128	0.0975993	0.0915388
1366	1366	0.201055	0.366889	0.0948561	0.024974	0.0915466	0.101479	0.12307	0.0663598	0.0350283	0.0511006	0.150769	0.0870744	0.0998796	0.0920367
1367	1367	0.223947	0.305621	0.0902479	0.0131675	0.0833001	0.0869361	0.0840415	0.0470085	0.078774	0.0551053	0.0644831	0.0922242	0.105935	0.0817366
1368	1368	0.230337	0.297361	0.0845638	0.0314411	0.077991	0.0999083	0.0735042	0.051787	0.122517	0.0125195	-0.0385164	0.0931298	0.107047	0.0846136
1369	1369	0.305987	0.267591	0.0770613	0.0507185	0.0666666	0.0880212	0.0808123	0.0460504	0.139423	-0.00646142	-0.0373832	0.103742	0.0922612	0.082315
1370	1370	0.135849	0.259157	0.0933041	0.0701481	0.0802303	0.0723181	0.0767933	0.0709877	0.102651	0.00786778	0.0993658	0.0975828	0.107946	0.0748561
1371	1371	0.217228	0.249748	0.104265	0.0627558	0.069869	0.0869473	0.0958425	0.0907023	0.140861	0.0837321	-0.0111359	0.0930304	0.12202	0.086529
1372	1372	0.265082	0.234129	0.105161	0.0502052	0.0833639	0.0740741	0.0784141	0.0726136	0.11656	0.0651396	0.124601	0.091314	0.0821495	0.0723009
1373	1373	0.219762	0.250752	0.110638	0.0599473	0.0875913	0.0733401	0.0769231	0.144258	0.151754	0.0227512	0.134418	0.0985737	0.0773213	0.0719882
1374	1374	0.221429	0.279762	0.104689	0.0479781	0.0841389	0.0798042	0.175637	0.259053	0.111278	0.00370996	0.142122	0.105443	0.0780472	0.0778801
1375	1375	0.173333	0.203723	0.0868682	0.037403	0.0793312	0.0733063	0.164568	0.236566	0.117904	0.0909091	0.141234	0.0832618	0.0898764	0.063072
1376	1376	0.0849802	0.268341	0.0770397	0.0137207	0.0891882	0.0680025	0.104263	0.181266	0.126359	0.00229886	0.217596	0.0694334	0.0868847	0.0712852
1377	1377	0.0752334	0.292208	0.10374	0.0511973	0.0862573	0.0832432	0.101205	0.159248	0.110939	0.0188554	0.161011	0.0558488	0.0885919	0.0754953
1378	1378	0.271281	0.243813	0.0991657	0.0539269	0.0523235	0.0737652	0.118407	0.0945803	0.118008	0.0352112	0.142857	0.049417	0.10622	0.0677587
1379	1379	0.200508	0.218015	0.0955396	0.0604468	0.0633002	0.0629607	0.105372	0.19646	0.12505	0.030303	0.0734613	0.0530878	0.127352	0.0918075
1380	1380	0.259542	0.233716	0.0927696	0.0637084	0.0681199	0.0739785	0.113664	0.258065	0.136505	0.0286749	0.0833948	0.0628694	0.0848471	0.0650246
1381	1381	0.209016	0.229494	0.108302	0.0363512	0.0639948	0.0761055	0.153276	0.231119	0.166667	0.0543272	0.11752	0.0659454	0.121461	0.0675774
1382	1382	0.17551	0.217818	0.0721449	0.0395529	0.0686433	0.072621	0.176396	0.170584	0.165127	0.076524	0.12472	0.0620859	0.109409	0.082159
1383	1383	0.150407	0.229495	0.0870394	0.0142247	0.07356	0.0752194	0.117332	0.142546	0.127128	0.0743013	0.0391937	0.0757299	0.131804	0.0778283
1384	1384	0.172269	0.199849	0.0850319	0.0543029	0.070546	0.0751494	0.0862069	0.0481013	0.154485	0.0930054	-0.00514138	0.0775983	0.146335	0.096132
1385	1385	0.122312	0.229839	0.0729429	0.0574074	0.0419447	0.0875596	0.105201	0.124901	0.153114	0.0252809	0.0634072	0.0561957	0.116691	0.102895
1386	1386	0.149381	0.22578	0.0317125	0.053258	0.0553781	0.0829038	0.00761698	0.211437	0.109184	0.0201342	0.0959571	0.0581882	0.104323	0.0902778
1387	1387	0.185549	0.281068	-0.0121382	0.060241	0.124531	0.0821772	-0.0346741	0.226597	0.109605	0.0133929	0.141201	0.0727763	0.107037	0.076226
1388	1388	0.12445	0.317929	-0.0338267	0.048974	0.129396	0.0756511	-0.0112045	0.234117	0.136057	0.0151394	0.126524	0.0749174	0.150284	0.0790043
1389	1389	0.139257	0.303977	-0.0343347	0.0478791	0.110562	0.0996342	-0.119601	0.23948	0.0854127	-0.0124908	0.102179	0.0724229	0.109622	0.0635659
1390	1390	0.171376	0.356228	0.106021	0.0522979	0.108881	0.122775	0.122355	0.2	0.102346	0.00795375	0.12066	0.0685314	0.0956062	0.0734523
1391	1391	0.15148	0.35692	0.0914498	0.0432653	0.118555	0.167988	0.04627	0.11891	0.103481	0.00307315	0.142931	0.0794923	0.110844	0.0688836
1392	1392	0.100424	0.32841	0.0902044	0.056674	0.122919	0.167105	0.0593221	0.120788	0.174455	-0.00555318	0.0805871	0.0640764	0.113858	0.0859023
1393	1393	0.147491	0.296408	0.0958542	0.0794638	0.115343	0.211468	0.0730074	0.134159	0.214751	0.00518138	0.0897772	0.0720542	0.106732	0.0981563
1394	1394	0.118208	0.283237	0.0629593	0.111737	0.110866	0.263107	0.111232	0.125042	0.213319	0.0111498	0.221476	0.071488	0.0899873	0.113036
1395	1395	0.185338	0.243883	0.0625252	0.109077	0.115079	0.249055	0.139665	0.11645	0.154011	0.0252905	0.151224	0.0715147	0.107435	0.120215
1396	1396	0.244167	0.251592	0.089812	0.100811	0.0875882	0.227817	0.176034	0.129404	0.12081	-0.013544	0.178152	0.078351	0.117449	0.110698
1397	1397	0.2	0.198941	0.0897849	0.0922358	0.121407	0.201401	0.137137	0.114066	0.170665	0.0590665	0.180281	0.0836781	0.180974	0.10755
1398	1398	0.153224	0.217841	0.195824	0.0929514	0.110597	0.167191	0.205504	0.103982	0.201687	-0.011534	0.15371	0.0787364	0.153239	0.0969957
1399	1399	0.177288	0.246147	0.111111	0.108087	0.084195	0.146054	0.171372	0.122473	0.152521	-0.0350027	0.218191	0.071775	0.169512	0.10308
1400	1400	0.246488	0.220238	0.116924	0.0858685	0.0905433	0.131988	0.102644	0.127075	0.145843	-0.0189781	0.188651	0.0800569	0.175232	0.0972831
1401	1401	0.262465	0.223114	0.116159	0.0805897	0.123849	0.126028	0.0913224	0.125296	0.113705	0.00048659	0.170519	0.0781062	0.169014	0.0907936
1402	1402	0.209101	0.237843	0.0909635	0.0725767	0.111861	0.165266	0.100529	0.155814	0.153331	0	0.144913	0.0857276	0.119696	0.0847322
1403	1403	0.244921	0.23475	0.0755653	0.0756302	0.0777597	0.244264	0.13711	0.169889	0.170799	0.0180062	0.113065	0.0815815	0.123077	0.0760977
1404	1404	0.307764	0.253097	0.0960648	0.0856354	0.0915321	0.287111	0.188521	0.167387	0.156112	0.00746968	0.141856	0.0715699	0.104444	0.0812611
1405	1405	0.250869	0.251641	0.0568432	0.0892204	0.110612	0.24455	0.21807	0.167192	0.171249	-0.0239362	0.152561	0.0695881	0.106172	0.105865
1406	1406	0.387424	0.243152	0.077278	0.077189	0.105218	0.181456	0.19458	0.152456	0.12917	-0.0500864	0.174949	0.0685453	0.115724	0.0902101
1407	1407	0.198257	0.220032	0.0292018	0.101641	0.106989	0.158428	0.194046	0.147328	0.101893	-0.0517241	0.132768	0.0750751	0.118851	0.0784421
1408	1408	0.228283	0.209973	0.0909091	0.10064	0.101105	0.147648	0.210425	0.146041	0.0856269	-0.0150943	0.165555	0.0847709	0.0836982	0.073052
1409	1409	0.242134	0.243434	-0.00153843	0.106835	0.0915169	0.100562	0.250106	0.184647	0.0475436	0.0240124	0.147348	0.0749104	0.127967	0.0798611
1410	1410	0.263158	0.198937	0.0807314	0.0841715	0.0929054	0.0722866	0.218411	0.206382	0.0235109	0.0335422	0.0938603	0.077894	0.10989	0.0791402
1411	1411	0.202229	0.179487	0.0115632	0.0641791	0.084288	0.0984222	0.0760171	0.254455	0.00782727	0.00473585	0.0590046	0.0772889	0.102487	0.0756217
1412	1412	0.240824	0.330978	0.0727569	0.0241287	0.0868544	0.119556	0.126012	0.244984	0.0127002	0.0363507	0.0636088	0.0816641	0.102265	0.117355
1413	1413	0.254902	0.299827	0.0755516	0.0292729	0.0838913	0.113057	0.0945652	0.216922	0.0170439	0.101309	0.182246	0.0950957	0.139312	0.0973545
1414	1414	0.190818	0.314965	0.0887068	0.00425535	0.0764331	0.110246	0.0930997	0.134366	0.0479603	0.080663	0.101957	0.0928551	0.118477	0.0931776
1415	1415	0.234097	0.293729	0.0703995	0.0149368	0.0868325	0.0870588	0.0913784	0.0809035	0.103286	-0.00121211	0.00393187	0.0901493	0.111694	0.0852873
1416	1416	0.323124	0.259412	0.0784554	0.0314286	0.074044	0.103135	0.094727	0.0282874	0.146546	0.0142267	-0.0668485	0.0920024	0.112679	0.0972763
1417	1417	0.272097	0.241818	0.0736633	0.0333102	0.0775255	0.0963426	0.0827133	0.0159768	0.140167	0.039778	0.0535077	0.0966794	0.11822	0.0833556
1418	1418	0.257294	0.26127	0.0776849	0.036394	0.0705883	0.075183	0.0881966	0.0393901	0.131849	0.0879937	0.0392365	0.0890493	0.133592	0.0885484
1419	1419	0.209497	0.24936	0.0889504	0.039838	0.0948432	0.0731707	0.0830005	0.0751553	0.131083	0.0565903	0.096563	0.0805032	0.0898661	0.0809685
1420	1420	0.181208	0.222017	0.111496	0.068882	0.0942725	0.0680761	0.0844738	0.121501	0.151936	0.0309798	0.0637054	0.0928616	0.0827397	0.0922921
1421	1421	0.137746	0.241247	0.107644	0.0605746	0.0763251	0.0687462	0.1234	0.206134	0.128643	0.00593782	0.12	0.10094	0.0856164	0.0757652
1422	1422	0.153571	0.224471	0.101139	0.0399714	0.0722714	0.0679941	0.0962638	0.18408	0.147783	0.081746	0.0427554	0.0659042	0.0887372	0.0765332
1423	1423	0.204819	0.212757	0.102483	0	0.0802377	0.0795307	0.0938404	0.0700742	0.12843	0.0543099	0.133962	0.0654008	0.0805254	0.0803594
1424	1424	0.176358	0.210608	0.12119	0.06984	0.0925858	0.0877498	0.179211	0.0103093	0.131359	0.0193594	0.139144	0.0644457	0.0792291	0.0760668
1425	1425	0.188587	0.19084	0.121972	0.0628845	0.0669546	0.0750053	0.13714	0.00539088	0.108559	0.0256094	0.115983	0.0620653	0.107056	0.0863931
1426	1426	0.155867	0.211334	0.0980556	0.0632994	0.0749465	0.0703223	0.104514	0.171797	0.136635	0.0634024	0.0856372	0.047544	0.121301	0.0814696
1427	1427	0.280576	0.26243	0.0967297	0.0549663	0.0789204	0.0752551	0.138171	0.227173	0.127122	0.0496855	0.0655509	0.0597695	0.0558598	0.065245
1428	1428	0.120459	0.214907	0.100373	0.0446364	0.0756739	0.0713348	0.126792	0.191249	0.118865	0.023224	0.0831696	0.0640597	0.108736	0.0677394
1429	1429	0.192913	0.225471	0.0857343	0.0470588	0.0691303	0.073877	0.10999	0.151055	0.191919	0.0833333	0.0924703	0.0632296	0.101346	0.0859068
1430	1430	0.225263	0.239984	0.0716493	0.0195925	0.0614088	0.0776761	0.0998249	0.218164	0.163916	0.0364532	0.0883459	0.064257	0.0982294	0.0813053
1431	1431	0.207627	0.196319	0.0817757	0.0535997	0.061008	0.0808474	0.0873309	-0.0102489	0.188496	-0.063745	0.0823271	0.0585883	0.0951322	0.0847085
1432	1432	0.10514	0.237687	-0.00338412	0.032913	0.0609407	0.0767285	0.123829	0.11951	0.176074	0	0.0465409	0.0607486	0.123288	0.0946569
1433	1433	0.143976	0.215718	-0.0239521	0.0492102	0.0471753	0.0738854	0.112457	0.193065	0.0960881	0.00753135	0.110711	0.0729695	0.111265	0.0914761
1434	1434	0.179433	0.221471	0.0236686	0.0545558	0.112777	0.0836687	0.0372041	0.182609	0.125335	-0.0122449	0.109481	0.0822863	0.117734	0.085389
1435	1435	0.14359	0.269775	-0.0454545	0.0609456	0.12325	0.07189	0.00957588	0.204301	0.0990774	-0.0287719	0.131653	0.0762914	0.143801	0.0700883
1436	1436	0.113402	0.260849	-0.00891973	0.0446568	0.12147	0.0910664	-0.118531	0.196157	0.0411673	-0.0224784	0.0855299	0.0728406	0.104173	0.0728894
1437	1437	0.15577	0.285357	0.0545678	0.0452614	0.109623	0.12069	0.120818	0.169385	0.171812	0.0060951	0.125	0.068112	0.114401	0.0773376
1438	1438	0.152699	0.265564	0.0752827	0.0511745	0.11292	0.111601	0.103448	0.0892449	0.110112	0.0127412	0.119604	0.0742636	0.0986639	0.0749311
1439	1439	0.102865	0.343051	0.0142229	0.0848762	0.119767	0.120381	0.0741627	0.0671937	0.177719	0.0257133	0.196887	0.0683316	0.136606	0.0823909
1440	1440	0.160755	0.307113	0.0630316	0.0740922	0.101841	0.217501	0.096	0.0997797	0.234934	0.0221341	0.234634	0.0645985	0.124708	0.116199
1441	1441	0.0941392	0.282241	0.0677656	0.0849032	0.0948848	0.250726	0.098452	0.124959	0.18842	0.0143669	0.120266	0.0684077	0.0935915	0.142323
1442	1442	0.198142	0.28469	0.0839953	0.0702511	0.0986248	0.254818	0.123543	0.114239	0.125815	-0.0163236	0.217627	0.0768626	0.12604	0.156285
1443	1443	0.236501	0.217061	0.0579773	0.0595045	0.118698	0.207774	0.106295	0.130762	0.143006	0.070992	0.189873	0.094537	0.140135	0.151889
1444	1444	0.207453	0.220017	0.103428	0.0821172	0.0956451	0.172038	0.142995	0.139233	0.150348	-0.0125911	0.162239	0.0908067	0.134226	0.0990902
1445	1445	0.184193	0.283319	0.198198	0.070919	0.102316	0.167389	0.134759	0.126509	0.144354	-0.00944801	0.149972	0.0875248	0.144213	0.0999079
1446	1446	0.295701	0.282327	0.119272	0.0605153	0.107603	0.150877	0.187778	0.145933	0.108903	-0.0173525	0.118118	0.0905877	0.124577	0.091329
1447	1447	0.297466	0.222448	0.140699	0.0621193	0.117961	0.129344	0.178199	0.131403	0.143263	-0.02079	0.126256	0.0854824	0.115112	0.079491
1448	1448	0.22722	0.228974	0.118143	0.0447699	0.104084	0.139246	0.203076	0.12504	0.137712	-0.0232558	0.1231	0.0819752	0.137848	0.0782496
1449	1449	0.287241	0.219554	0.117072	0.0636421	0.102987	0.154293	0.18008	0.195489	0.168499	0.0108481	0.0911765	0.0798619	0.1019	0.0597199
1450	1450	0.25	0.236332	0.0953271	0.0719861	0.0968586	0.178926	0.192602	0.189655	0.174787	0.00716676	0.0917474	0.0838192	0.112737	0.0911116
1451	1451	0.296941	0.216114	0.104413	0.0629734	0.0958409	0.190728	0.199513	0.1763	0.146828	0.0132029	0.148259	0.0733244	0.117131	0.0898235
1452	1452	0.398115	0.245545	0.0659218	0.0549944	0.0995516	0.194333	0.180052	0.164127	0.140508	0.0094997	0.175766	0.0673818	0.0925881	0.109549
1453	1453	0.412214	0.23507	0.0585182	0.0771853	0.100926	0.184922	0.126744	0.14521	0.122699	-0.112825	0.153558	0.0729776	0.112341	0.0852044
1454	1454	0.343533	0.218075	0.0236262	0.0834444	0.103536	0.156849	0.107122	0.161324	0.140665	-0.0611511	0.159136	0.0718636	0.124827	0.0637119
1455	1455	0.269646	0.222691	0.0782675	0.0534308	0.0780793	0.139228	0.126173	0.146696	0.136303	-0.0341394	0.154112	0.0702367	0.113611	0.0642099
1456	1456	0.232975	0.224553	0.0316857	0.045427	0.0673358	0.102795	0.143014	0.184878	0.0476935	-0.021483	0.109756	0.0741851	0.111989	0.0777633
1457	1457	0.254054	0.220687	0.0598106	0.0351341	0.0710784	0.0748385	0.134752	0.195596	0.0287336	-0.0310766	0.0429906	0.0882037	0.11244	0.0673732
1458	1458	0.304207	0.224292	0.0454235	0.000513054	0.0861033	0.092803	0.206115	0.23041	0.0136823	-0.00435836	0.0813288	0.0809509	0.125628	0.0875775
1459	1459	0.293935	0.233882	0.0847967	0.026465	0.101224	0.127403	0.143042	0.222127	0.00696681	0.00791065	0.070688	0.0841613	0.144448	0.100741
1460	1460	0.275641	0.27062	0.0760362	0.0219503	0.100725	0.104585	0.108067	0.273378	0.0205183	0.0122757	-0.0862534	0.0812661	0.139026	0.0824689
1461	1461	0.310924	0.299553	0.0850415	0.0501177	0.0882239	0.106828	0.117986	0.20928	0.0318157	-0.0120603	0.0247046	0.0765621	0.115342	0.101849
1462	1462	0.265993	0.292601	0.0737315	0.0250569	0.0860625	0.115298	0.0613536	0.192429	0.060307	0.0154867	0.00459134	0.0830825	0.110039	0.0822535
1463	1463	0.278443	0.252422	0.0861663	0.0329148	0.0871525	0.110317	0.0623583	0.146139	0.109589	-0.00434573	0.0769231	0.103282	0.10757	0.0944476
1464	1464	0.169385	0.277805	0.0834047	0.0353193	0.0731529	0.0986557	0.091187	0.115821	0.155304	0.0138834	0.0981098	0.0850561	0.121985	0.074179
1465	1465	0.279621	0.289812	0.0688193	0.0262763	0.0825556	0.0928204	0.108628	0.0750589	0.155421	0.0672174	0.0806075	0.0755287	0.130242	0.0829976
1466	1466	0.307054	0.236794	0.0862838	0.0168516	0.0742774	0.092128	0.115146	0.0661337	0.143637	0.124235	0.0439914	0.0979043	0.0925719	0.0905252
1467	1467	0.207262	0.236674	0.0896627	0.0466667	0.066512	0.0882416	0.132562	0.0863248	0.118132	0.0569492	0.133962	0.0797619	0.0807082	0.0795367
1468	1468	0.190476	0.224605	0.115719	0.0543229	0.0528489	0.069639	0.127549	0.115224	0.125473	0.020979	-0.0771558	0.0555259	0.0789908	0.0720721
1469	1469	0.191136	0.210906	0.103193	0.0359138	0.0851944	0.0799052	0.143552	0.144279	0.114927	0.0365736	0.0637813	0.0578811	0.0870397	0.0745217
1470	1470	0.114754	0.20264	0.1005	0.0676441	0.0673077	0.0869377	0.258611	0.0868644	0.133333	-0.0107288	0.14094	0.062	0.0804706	0.0677576
1471	1471	0.226757	0.189687	0.112315	0.0448777	0.081448	0.086746	0.175842	0.0447369	0.162068	0.0168434	0.115082	0.0698027	0.0689655	0.0811091
1472	1472	0.246988	0.186846	0.1172	0.0510006	0.0831178	0.0747886	0.16215	0.0336474	0.109944	0.0409836	0.0933148	0.0557984	0.122901	0.0782196
1473	1473	0.214612	0.204609	0.108412	0.0453461	0.0811184	0.0830494	0.105088	0.114788	0.143076	0.0346939	0.044818	0.0675325	0.130286	0.0755395
1474	1474	0.188648	0.207284	0.0909977	0.0562837	0.0866863	0.0785525	0.0800157	0.163575	0.122897	0.00267685	0.0460251	0.0730405	0.0973451	0.0838909
1475	1475	0.106383	0.207898	0.121827	0.0309654	0.0619579	0.0714748	0.0811966	0.172945	0.109397	0.0259319	0.115646	0.0571701	0.109602	0.0841424
1476	1476	0.193658	0.231601	0.0803877	0.0296496	0.0762712	0.0848629	0.0922918	0.26948	0.143708	-0.0702948	0.0869131	0.0545129	0.144408	0.096793
1477	1477	0.214159	0.209539	0.0533499	0.0547457	0.0705882	0.0796848	0.0989011	0.285092	0.177856	-0.0488372	0.0677656	0.0565564	0.130435	0.0821766
1478	1478	0.0930758	0.210988	-0.010628	0.0557315	0.0648769	0.0792373	0.116431	0.042641	0.139992	-0.00627803	0.0500253	0.065119	0.135162	0.0804359
1479	1479	0.110178	0.224078	-0.019305	0.0573596	0.113095	0.0763391	0.134347	0.057715	0.0852494	0.0593857	0.139716	0.0685507	0.148673	0.0825834
1480	1480	0.168274	0.24305	-0.0385757	0.0598242	0.118169	0.0774737	0.0918519	0.094953	0.115607	0.0137858	0.0979968	0.0840245	0.114515	0.0889244
1481	1481	0.15977	0.239149	0.0277778	0.0393175	0.11007	0.0676819	0.0598802	0.13811	0.12016	-0.016094	0.1188	0.0771906	0.106449	0.0865591
1482	1482	0.174875	0.223186	0.00808626	0.0472915	0.104886	0.0913895	0.123791	0.186858	0.0831202	0.0157728	0.0650407	0.0811495	0.142349	0.0787124
1483	1483	0.185625	0.22201	0.0633694	0.0411644	0.102322	0.104365	0.0956938	0.190083	0.249082	0.0140931	0.111409	0.077661	0.12534	0.0867725
1484	1484	0.171392	0.222731	0.0531814	0.06253	0.118435	0.104203	0.0808989	0.181759	0.17263	0.0134082	0.229814	0.0771751	0.128781	0.0877381
1485	1485	0.129885	0.266579	0.0657343	0.0567854	0.105649	0.134959	0.0990727	0.0935421	0.209726	0.014245	0.158358	0.0807093	0.081133	0.139247
1486	1486	0.145339	0.342781	0.00206473	0.0652021	0.111028	0.19019	0.120661	0.0842811	0.236364	0.00785853	0.191292	0.0712431	0.0857428	0.125886
1487	1487	0.111697	0.3017	0.0940824	0.0652906	0.117937	0.220222	0.118442	0.107185	0.216506	0.0109489	0.166302	0.0778489	0.123826	0.130615
1488	1488	0.291919	0.271787	0.0291508	0.0484051	0.108424	0.238482	0.0814889	0.141509	0.129374	0.00261877	0.249692	0.0866733	0.123032	0.113592
1489	1489	0.196111	0.225835	0.0832197	0.0614961	0.099681	0.18796	0.0742092	0.124257	0.131286	0.0456274	0.201958	0.0849543	0.101343	0.0809302
1490	1490	0.190088	0.231608	-0.00578991	0.0468891	0.105718	0.157286	0.129342	0.130355	0.164595	-0.0703517	0.16885	0.0832673	0.130942	0.0879521
1491	1491	0.235337	0.307902	0.0934097	0.0447958	0.116337	0.156658	0.183901	0.127193	0.113031	-0.0191083	0.170426	0.0824516	0.123478	0.0752643
1492	1492	0.3132	0.284143	0.140196	0.0506741	0.118968	0.148299	0.16985	0.163381	0.100443	-0.0021097	0.117775	0.08351	0.133762	0.0828848
1493	1493	0.28271	0.235531	0.114431	0.0579014	0.110342	0.160342	0.200573	0.192636	0.159866	0.0107067	0.161709	0.0839064	0.124965	0.0950124
1494	1494	0.239829	0.237295	0.13981	0.0704648	0.0925508	0.146168	0.133025	0.214888	0.142857	-0.00863001	0.162901	0.0862108	0.102329	0.0808926
1495	1495	0.243381	0.243021	0.131544	0.0614077	0.101964	0.154998	0.1681	0.209125	0.145242	0.00203045	0.107532	0.0891046	0.0760895	0.069664
1496	1496	0.241517	0.25516	0.151687	0.0369237	0.0961625	0.138674	0.148477	0.263558	0.147079	-0.0175605	0.131902	0.0821109	0.0843313	0.0818428
1497	1497	0.275978	0.217965	0.0953786	0.050256	0.105474	0.138393	0.157098	0.219126	0.146461	0.0265866	0.0986964	0.0814495	0.0939255	0.0790944
1498	1498	0.351032	0.250791	0.121438	0.0497643	0.0947368	0.177338	0.0625551	0.183178	0.125691	0.0328385	0.100262	0.0766823	0.0970874	0.0777526
1499	1499	0.212209	0.246314	0.0866783	0.0643939	0.0864414	0.172889	0.153195	0.147856	0.157188	0.00239808	0.0924678	0.0711913	0.107193	0.0788406
1500	1500	0.158126	0.200151	0.086433	0.0565185	0.0743155	0.154175	0.2202	0.194144	0.153037	-0.00860044	0.132446	0.0726475	0.105309	0.0595133
1501	1501	0.25695	0.2236	0.0638968	0.0483438	0.0734369	0.132786	0.179712	0.168964	0.185418	-0.0328185	0.139818	0.0696963	0.103463	0.070127
1502	1502	0.280788	0.226248	0.0591293	0.0309488	0.0700435	0.106424	0.192578	0.189525	0.145108	-0.146184	0.162365	0.0678751	0.112147	0.0797944
1503	1503	0.195122	0.286664	0.042206	0.0377124	0.0903955	0.0803778	0.241907	0.186778	0.114967	-0.135006	0.066879	0.0752816	0.122309	0.0843237
1504	1504	0.171542	0.239496	0.0821256	0.0216696	0.11313	0.0895588	0.169408	0.232766	0.0476636	-0.0470914	0.0826795	0.0709489	0.130686	0.0877393
1505	1505	0.215953	0.240764	0.0895395	0.0239168	0.103695	0.123714	0.0997921	0.252706	0.0248987	-0.0162314	0.0143369	0.0594785	0.131831	0.0851893
1506	1506	0.264659	0.268789	0.0847541	0.0286503	0.103659	0.115761	0.143354	0.239917	0.0257599	0.0169491	-0.0755287	0.0630415	0.117498	0.0934004
1507	1507	0.238255	0.309	0.0784604	0.0241611	0.0897719	0.103328	0.146942	0.243438	0.0120419	0.0357918	0.0263991	0.0940639	0.101436	0.0953846
1508	1508	0.246347	0.288331	0.0918656	0.0373928	0.0841727	0.11673	0.0696475	0.186618	0.0303371	0.0202475	-0.0140105	0.098728	0.104426	0.0758699
1509	1509	0.238325	0.292262	0.087386	0.0290456	0.0714542	0.114514	0.0448916	0.192165	0.0671849	0.0146572	0.0194265	0.0884798	0.115233	0.0708393
1510	1510	0.260204	0.271714	0.0735294	0.0347081	0.0747331	0.106003	0.109049	0.249434	0.194472	0.0262712	0.0804306	0.0893771	0.108309	0.0845304
1511	1511	0.271065	0.215704	0.0735294	-0.0109204	0.0674618	0.0986343	0.102957	0.177349	0.178919	0.0560928	0.0548906	0.0936832	0.0935252	0.0937254
1512	1512	0.323504	0.230833	0.10225	0.013253	0.0782754	0.098081	0.121104	0.0646853	0.170356	0.0730296	0.0839694	0.0787037	0.112399	0.0786928
1513	1513	0.104167	0.203484	0.120948	0.0627032	0.0907473	0.0889077	0.181785	0.120954	0.116489	0.00670195	0.130035	0.0661765	0.0970966	0.0784314
1514	1514	0.211094	0.197035	0.114943	0.048809	0.103688	0.074359	0.161954	0.197531	0.128484	-0.0257442	-0.119874	0.0608211	0.117122	0.0648056
1515	1515	0.15534	0.2147	0.115503	0.0572412	0.0751819	0.0759467	0.166805	0.178333	0.132599	0.0551791	0.0282776	0.063723	0.108544	0.0788466
1516	1516	0.159378	0.228992	0.110515	0.0471014	0.0909091	0.0800263	0.12793	0.0801394	0.124574	-0.00636403	0.121998	0.0661034	0.0978473	0.0757808
1517	1517	0.158506	0.222589	0.120415	0.049461	0.0923726	0.0920876	0.162474	0.0239362	0.147059	0.000680747	0.0781129	0.0599148	0.119588	0.068421
1518	1518	0.237605	0.203131	0.124098	0.0340909	0.0708995	0.079868	0.112782	0.035409	0.120277	0.0363227	0.119348	0.0648836	0.147172	0.0770031
1519	1519	0.28877	0.217255	0.0971406	0.0404441	0.0720962	0.0711369	0.0942452	0.176806	0.12369	0.00997152	0.0697368	0.0636108	0.119048	0.101519
1520	1520	0.114413	0.203156	0.124459	-0.00587662	0.0744125	0.0635666	0.0991379	0.198853	0.0952895	-0.0395371	0.0795724	0.0567164	0.0591201	0.0902684
1521	1521	0.156654	0.218146	0.0705434	0.048715	0.0895376	0.0771219	0.114367	0.203941	0.106481	0.021017	0.0868984	0.0703057	0.0884824	0.0914737
1522	1522	0.189711	0.193059	0.0903427	0.0500164	0.0817015	0.0843322	0.105435	0.212249	0.104511	-0.00471699	0.0725191	0.0717316	0.117519	0.0825388
1523	1523	0.194366	0.196166	0.0163679	0.0568289	0.0633356	0.0788921	0.0967742	0.110559	0.101826	0.0207762	0.131359	0.071994	0.101996	0.0709163
1524	1524	0.104218	0.229695	0.0380282	0.0599591	0.0974048	0.0761443	0.103992	0.0574163	0.0611979	0.0288066	0.0790791	0.0732984	0.131049	0.0886554
1525	1525	0.169942	0.230339	-0.00433528	0.0566461	0.101124	0.0710543	0.10426	0.14751	0.0996491	0.00970268	0.0879533	0.0878646	0.142635	0.0909091
1526	1526	0.161114	0.233376	0.0666667	0.0571768	0.100694	0.0692865	0.117041	0.171923	0.143973	0.0350564	0.129096	0.085413	0.118417	0.0900078
1527	1527	0.190797	0.25104	0.0761636	0.0652381	0.0927106	0.0882041	0.142857	0.219557	0.164057	0.0288377	0.111423	0.0921333	0.114252	0.0738396
1528	1528	0.148888	0.229773	0.0840463	0.0780318	0.0997249	0.0759283	0.102924	0.242847	0.23832	0.0280933	0.250791	0.0918664	0.112373	0.0651422
1529	1529	0.196456	0.216717	0.0686679	0.0578811	0.0898634	0.0977974	0.101033	0.173246	0.175525	0.0218399	0.146916	0.0862488	0.115353	0.0754668
1530	1530	0.153864	0.232418	0.0729956	0.0670157	0.11028	0.141832	0.115101	0.110858	0.198054	0.0249163	0.121776	0.0773845	0.0839844	0.10249
1531	1531	0.120183	0.36753	0.0102302	0.0752688	0.119697	0.174881	0.0889851	0.11637	0.218526	-0.00345423	0.174059	0.0820244	0.0891304	0.125934
1532	1532	0.109563	0.328372	0.0801422	0.0679144	0.10751	0.2105	0.0805797	0.121566	0.237611	-0.00851467	0.23831	0.093249	0.105477	0.134275
1533	1533	0.253473	0.271404	0.0365449	0.0793472	0.0930516	0.228557	0.0582677	0.132076	0.212254	0.0543893	0.200938	0.0892061	0.108457	0.098161
1534	1534	0.176399	0.289639	0.0103306	0.0789317	0.0853762	0.201733	0.120894	0.0960766	0.122308	-0.0165687	0.117845	0.0926763	0.116414	0.0895993
1535	1535	0.200399	0.237471	0.0314027	0.0641289	0.103209	0.178672	0.109603	0.120695	0.137816	-0.020757	0.140594	0.0879609	0.0842044	0.0898612
1536	1536	0.255952	0.273408	0.00416321	0.0678889	0.109051	0.165923	0.129237	0.142655	0.141857	-0.0231363	0.106383	0.0794532	0.107599	0.0773481
1537	1537	0.267776	0.303455	0.0526316	0.0773286	0.0960503	0.165834	0.142514	0.196669	0.102027	-0.0055866	0.130747	0.0752688	0.129043	0.0998831
1538	1538	0.219064	0.25082	0.141617	0.0770568	0.101516	0.180451	0.0594059	0.19547	0.144547	0.0240771	0.0837359	0.0729463	0.115295	0.0972521
1539	1539	0.290195	0.233115	0.137474	0.0722952	0.0973612	0.162274	0.196319	0.174006	0.140731	0.0164261	0.096609	0.0744657	0.0981984	0.0870635
1540	1540	0.286917	0.256387	0.137546	0.0324455	0.0991771	0.142363	0.158345	0.273508	0.113032	-0.0173913	0.128083	0.078341	0.0962895	0.0860821
1541	1541	0.255392	0.249015	0.147739	0.0802469	0.102431	0.13991	0.111737	0.315138	0.131551	0.00381195	0.0829194	0.0754248	0.0725842	0.0868597
1542	1542	0.238134	0.23588	0.117915	0.0548781	0.0943068	0.151478	0.0649895	0.268917	0.147566	0.0160571	0.0535909	0.0792918	0.0888937	0.0740741
1543	1543	0.256846	0.235813	0.113797	0.0576208	0.0880644	0.184437	0.179207	0.230533	0.13832	0.0104322	0.0450704	0.0935046	0.0854464	0.06615
1544	1544	0.238342	0.257405	0.0831696	0.0704329	0.0854626	0.165306	0.205742	0.190658	0.214986	-0.0163755	0.141477	0.0794319	0.104783	0.0565699
1545	1545	0.204563	0.210547	0.105676	0.0519924	0.0894447	0.173365	0.143105	0.225532	0.21547	-0.0091228	0.100623	0.0569177	0.103702	0.0609574
1546	1546	0.215083	0.265337	0.100285	0.0400538	0.0808614	0.130312	0.171953	0.164204	0.207895	-0.0427184	0.111326	0.0827776	0.101804	0.0648694
1547	1547	0.192007	0.266106	0.0794297	0.0375448	0.0887772	0.127229	0.16179	0.158192	0.135135	-0.0869199	0.0422752	0.0859604	0.107619	0.0760563
1548	1548	0.187056	0.270079	0.0459197	0.0330551	0.115977	0.0785318	0.130612	0.184345	0.193548	-0.0461298	0.0997123	0.063868	0.135262	0.079646
1549	1549	0.200528	0.228688	0.0762922	0.0243568	0.100233	0.0868476	0.117647	0.238095	0.119298	-0.0401483	0.0434164	0.0580838	0.126124	0.0980279
1550	1550	0.174208	0.226824	0.0988007	0.0166667	0.0885595	0.112024	0.126	0.201373	0.0375989	0.00749066	-0.0375939	0.0720831	0.112695	0.0788863
1551	1551	0.2484	0.280503	0.0939281	0.0251256	0.0808417	0.124153	0.177391	0.232598	0.041594	0.0647249	-0.097931	0.105247	0.111658	0.0777143
1552	1552	0.185466	0.270163	0.0798995	0.0215208	0.0763081	0.113992	0.146998	0.223312	0.0112304	0.00838169	-0.00973234	0.0860409	0.102884	0.0824115
1553	1553	0.184424	0.284881	0.0863214	0.00309596	0.0769231	0.12175	0.0704501	0.170238	0.0209524	0.0283688	-0.0125673	0.0760234	0.106475	0.089316
1554	1554	0.214639	0.239596	0.0747347	0.0407098	0.0753623	0.121447	0.103139	0.200209	0.0424818	0.0236742	0.0753525	0.0884558	0.133226	0.0915649
1555	1555	0.26935	0.196917	0.0799773	-0.00323273	0.0808796	0.10186	0.135103	0.240154	0.121597	0.0168512	0.0979888	0.0843092	0.122105	0.0725287
1556	1556	0.282996	0.218204	0.0743858	0.0207629	0.0873709	0.0919037	0.121187	0.222502	0.144087	0.00515021	0.0645624	0.0758467	0.103917	0.0743977
1557	1557	0.282565	0.194805	0.0917509	0.0531094	0.106948	0.085198	0.180357	0.118012	0.153275	0.0331651	0.0174419	0.0635331	0.111482	0.0580678
1558	1558	0.19703	0.209408	0.0888766	0.0491257	0.0878777	0.0827829	0.154305	0.170099	0.140878	0.050221	-0.109698	0.0491237	0.113965	0.0839216
1559	1559	0.160879	0.224981	0.123159	0.0515191	0.0720325	0.0789531	0.145383	0.217228	0.14326	-0.00221975	-0.0276243	0.0517326	0.118338	0.0711382
1560	1560	0.150212	0.225152	0.0895962	0.0420063	0.082739	0.0756156	0.106411	0.183267	0.140053	-0.0157218	0.0549898	0.0553254	0.11	0.0652557
1561	1561	0.172927	0.21046	0.108914	0.0424164	0.0921199	0.082929	0.145545	0.175423	0.114487	0.0274856	0.0747508	0.0565584	0.125157	0.0654732
1562	1562	0.1093	0.20624	0.108662	0.0525959	0.0871985	0.0892581	0.216301	0.149533	0.103191	0.0351727	0.129771	0.0591536	0.126542	0.0701392
1563	1563	0.179572	0.191694	0.106318	0.0251062	0.069327	0.0746915	0.165509	0.0599201	0.105627	0.012239	0.075183	0.0644788	0.130804	0.0803266
1564	1564	0.249548	0.187218	0.0960142	-0.000462722	0.0828068	0.0625	0.140773	0.175676	0.12	-0.030853	0.0652174	0.0746401	0.148242	0.0887446
1565	1565	0.129833	0.209877	0.118261	0.0452555	0.0819564	0.0737847	0.123749	0.113122	0.108966	-0.00101835	0.0432692	0.0829484	0.165501	0.0816658
1566	1566	0.167572	0.171159	0.0738504	0.0306513	0.0732984	0.0824451	0.100909	0.169399	0.0922787	0.025217	0.0660744	0.0874036	0.0959946	0.0751225
1567	1567	0.191729	0.200991	0.0746269	0.0543933	0.0878578	0.077816	0.0895795	0.128329	0.0949127	0.0427146	0.0800488	0.0885035	0.0938284	0.0720207
1568	1568	0.174802	0.185507	0.0547397	0.0525108	0.0902152	0.0756699	0.109779	0.148564	0.0875146	0.0226513	0.0537781	0.0948559	0.125539	0.0673953
1569	1569	0.192228	0.216143	0.0365945	0.0586301	0.0815966	0.0715035	0.0964188	0.0941597	0.103958	0.0239542	0.0731707	0.0942872	0.125709	0.0824176
1570	1570	0.192579	0.264214	0.0220264	0.0860927	0.106045	0.0724103	0.146379	0.199662	0.144721	0.019993	0.0778412	0.1053	0.113153	0.0901194
1571	1571	0.156543	0.223218	0.0486009	0.0958977	0.0913412	0.0797851	0.0916218	0.241322	0.152828	0.0400859	0.103396	0.0941736	0.120045	0.0822768
1572	1572	0.182151	0.206219	0.0802348	0.0903138	0.0982049	0.0783257	0.104738	0.20089	0.15766	0.0472072	0.206212	0.094717	0.0958164	0.0678195
1573	1573	0.1263	0.211972	0.0609675	0.0907494	0.113417	0.100088	0.0914429	0.218916	0.116168	0.0395062	0.136409	0.0926185	0.0901849	0.068655
1574	1574	0.125753	0.205823	0.102683	0.101777	0.10977	0.16352	0.0945946	0.198377	0.161939	0.0589278	0.147653	0.0800525	0.101001	0.10844
1575	1575	0.132136	0.291128	0.0754781	0.0781742	0.104823	0.203883	0.0490463	0.199678	0.173844	0.0294251	0.150295	0.0880996	0.0674487	0.0962861
1576	1576	0.147233	0.346225	0.0454546	0.0768799	0.101618	0.235174	0.0663265	0.182254	0.176223	-0.0099278	0.155556	0.0781952	0.110051	0.0691325
1577	1577	0.182525	0.264488	0.0393701	0.0855962	0.0891524	0.239791	0.111229	0.1833	0.133212	0.0210728	0.139286	0.0842259	0.121317	0.0767759
1578	1578	0.232028	0.334364	0.095613	0.0868263	0.0827206	0.223832	0.0796371	0.208462	0.100775	-0.0010504	0.132143	0.0909533	0.103335	0.0770305
1579	1579	0.258179	0.263315	0.0494012	0.078116	0.0853211	0.193946	0.0729242	0.173234	0.119227	0.00412005	0.130127	0.0824743	0.129114	0.086724
1580	1580	0.216427	0.225034	0.0581395	0.0703545	0.0928196	0.180846	0.0120482	0.141638	0.164998	0.0221643	0.0922731	0.0794332	0.10139	0.0905402
1581	1581	0.245902	0.260482	0.030047	0.0707337	0.0870124	0.171485	0.102345	0.186279	0.175016	-0.0030801	0.0737463	0.0749242	0.109485	0.093453
1582	1582	0.234533	0.214762	0.0521008	0.0811511	0.105126	0.164771	0.152958	0.259542	0.15008	0.020354	0.0760118	0.0768229	0.0822306	0.0539014
1583	1583	0.244212	0.220673	0.044586	0.0698331	0.0809889	0.188456	0.0850202	0.258032	0.120521	-0.000402068	0.115602	0.0774472	0.0867402	0.0675519
1584	1584	0.239003	0.237934	0.0591398	0.0401722	0.0817186	0.150591	0.0538642	0.208885	0.096291	0.0110672	0.146667	0.0714967	0.0922984	0.0857643
1585	1585	0.269973	0.231079	0.0853361	0.0841477	0.0880742	0.137953	0.0580998	0.223225	0.177049	0.0150754	0.127895	0.0738286	0.0749507	0.0814332
1586	1586	0.255587	0.216901	0.0935335	0.0694848	0.0954817	0.159653	0.174194	0.274411	0.177966	0.0274478	0.0971194	0.0680069	0.0892674	0.0838646
1587	1587	0.259934	0.21911	0.0802628	0.0684533	0.0861487	0.176519	0.146646	0.321597	0.133223	0.0201884	0.0841043	0.0897949	0.106853	0.0595992
1588	1588	0.234885	0.20817	0.0952634	0.0678183	0.0969928	0.172961	0.0533981	0.232282	0.1587	0.0319927	0.109041	0.0824542	0.103045	0.0768799
1589	1589	0.175798	0.199088	0.0865052	0.0409536	0.119658	0.181879	0.118573	0.179068	0.178817	0.0255341	0.0799396	0.0568027	0.120376	0.0655833
1590	1590	0.204664	0.256658	0.0980163	0.0388905	0.107311	0.158504	0.165537	0.150565	0.196884	-0.0086862	0.162833	0.076716	0.102172	0.0682014
1591	1591	0.206601	0.242584	0.110598	0.0339716	0.0957758	0.129368	0.105727	0.176096	0.148176	0.0190045	0.0508905	0.0652694	0.103448	0.0648992
1592	1592	0.207514	0.222498	0.0998668	0.031579	0.103336	0.0872396	0.086189	0.209328	0.200251	0.00821691	0.116241	0.0752752	0.120384	0.0700742
1593	1593	0.224732	0.21746	0.109052	0.0414313	0.0877329	0.0911361	0.134352	0.214631	0.0960929	-0.010453	0.143363	0.0896014	0.119695	0.0749574
1594	1594	0.229721	0.226115	0.0880495	0.0401043	0.0803835	0.109477	0.153392	0.236051	0.0779117	0.0326386	0.0373135	0.105798	0.104222	0.0621469
1595	1595	0.22198	0.211313	0.0834623	0.0250329	0.0913958	0.105103	0.0940439	0.242492	0.0209397	0.0549944	-0.0844063	0.0859675	0.107088	0.0773774
1596	1596	0.200709	0.229844	0.0773742	0.0209684	0.0920152	0.110483	0.0586283	0.208081	0.0285303	-0.00449004	-0.0148048	0.0762125	0.1043	0.0947939
1597	1597	0.184466	0.18715	0.0731017	0.00849859	0.0821037	0.114454	0.084597	0.175241	0.0147583	0.0349956	-0.0186722	0.0744714	0.114113	0.0757825
1598	1598	0.215076	0.171916	0.0874484	0.0370015	0.0889571	0.12192	0.114515	0.188696	0.0246711	0.0403516	0.0437743	0.0713677	0.122406	0.0623321
1599	1599	0.239258	0.224088	0.0743041	0.0264456	0.0930576	0.105691	0.10324	0.249605	0.0492625	-0.0153153	0.113367	0.0696304	0.111586	0.0682731
1600	1600	0.239387	0.220096	0.0809459	0.0393641	0.0959516	0.105263	0.140568	0.166118	0.110496	0.0516156	0.0441989	0.0868551	0.112969	0.0724947
1601	1601	0.159877	0.234626	0.0947452	0.0470039	0.0867802	0.098646	0.108005	0.20736	0.13132	0.119382	-0.107023	0.0604192	0.124043	0.0841965
1602	1602	0.164406	0.232866	0.114547	0.048717	0.0771235	0.0888443	0.138686	0.202899	0.151894	0.0496988	-0.123558	0.0473052	0.109892	0.0753608
1603	1603	0.188724	0.173734	0.104053	0.0664729	0.0686274	0.0731065	0.150432	0.203955	0.111881	-0.0237099	-0.082621	0.0494493	0.109745	0.0581575
1604	1604	0.156806	0.195076	0.123145	0.0471204	0.0748743	0.0784569	0.173522	0.173333	0.126739	-0.0385898	0.0424242	0.0605227	0.129464	0.0772432
1605	1605	0.125828	0.194909	0.100762	0.0484956	0.100863	0.0828778	0.207048	0.157104	0.103324	0.0216082	0.0766423	0.0638298	0.153632	0.0729569
1606	1606	0.210259	0.174157	0.130151	0.0588235	0.0882759	0.0747394	0.174425	0.138067	0.0814355	0.012504	0.114692	0.0724448	0.156699	0.0704762
1607	1607	0.284138	0.205872	0.083792	0.0277277	0.0789474	0.0733099	0.179039	0.0958606	0.0632223	0.0325203	0.102789	0.0797956	0.139558	0.0764156
1608	1608	0.187828	0.209214	0.101807	0.0293407	0.0724113	0.079568	0.106103	0.109226	0.0982202	0.0051493	0.125	0.0883418	0.12803	0.0840499
1609	1609	0.188152	0.176089	0.0776942	0.0592547	0.0751073	0.081069	0.0709516	0.216327	0.128824	0.012766	0.0557839	0.0816147	0.120807	0.0682124
1610	1610	0.211309	0.189129	0.0529248	0.0328555	0.0772502	0.0815872	0.0707071	0.215983	0.0589901	0.0397471	0.0758071	0.0790415	0.123902	0.0734874
1611	1611	0.160586	0.202904	0.0451578	0.0517586	0.0813397	0.0769904	0.110827	0.164309	0.129661	0.0348387	0.0760456	0.0890799	0.1158	0.0706593
1612	1612	0.165835	0.231114	0.0154947	0.0550692	0.0948955	0.0794473	0.0881226	0.120341	0.189608	0.0240326	0.0584053	0.0878525	0.115462	0.082523
1613	1613	0.169562	0.209266	0.0264263	0.0950506	0.0956107	0.0819039	0.0999226	0.178339	0.145254	0.0205347	0.110228	0.0854066	0.101117	0.0707351
1614	1614	0.173143	0.193323	0.0292573	0.0923781	0.100522	0.0763069	0.112717	0.254422	0.176722	0.0307577	0.212144	0.0758673	0.109076	0.0855856
1615	1615	0.158539	0.258392	0.0560847	0.101962	0.107737	0.0855923	0.0831025	0.239726	0.1288	0.000797402	0.128892	0.080554	0.100991	0.0688435
1616	1616	0.187871	0.261233	0.0482758	0.0929915	0.106626	0.104732	0.10573	0.207425	0.152104	-0.0062946	0.168529	0.0805802	0.0763579	0.0714082
1617	1617	0.15462	0.195385	0.082898	0.0783083	0.0925778	0.167633	0.0860065	0.229277	0.16895	0.00260871	0.167334	0.0746464	0.0840652	0.0710672
1618	1618	0.133635	0.250589	0.0665722	0.0742029	0.083982	0.203165	0.101544	0.260833	0.166355	0.0112829	0.1397	0.0776502	0.0787364	0.0457842
1619	1619	0.0893194	0.305908	0.0469929	0.0821141	0.0769908	0.239766	0.0996979	0.235244	0.1216	0.0229277	0.12234	0.0733733	0.111816	0.0733763
1620	1620	0.153981	0.274597	0.00904523	0.0807962	0.0852928	0.238209	0.0938338	0.198624	0.129586	-0.0461705	0.0801932	0.0903928	0.0967896	0.0896803
1621	1621	0.278491	0.282132	0.0504032	0.0799666	0.0831793	0.214684	0.0043956	0.189431	0.173458	0.0139373	0.126949	0.0867924	0.0864608	0.0842413
1622	1622	0.242424	0.238502	0.00666669	0.0675	0.0983464	0.196901	0.021978	0.158637	0.173042	-0.0137966	0.0765262	0.0678753	0.10397	0.0671194
1623	1623	0.202433	0.200513	0.0782982	0.0647372	0.0825532	0.189153	0.11028	0.191095	0.168759	0.00910889	0.0822712	0.084617	0.10068	0.0781785
1624	1624	0.225462	0.238617	0.0572172	0.0784071	0.0919932	0.185629	0.0562701	0.244663	0.156016	0.0260014	0.0511727	0.0859178	0.104327	0.0462939
1625	1625	0.253292	0.205197	0.0625931	0.069925	0.0824129	0.182367	-0.00117235	0.200411	0.169785	0.0194141	0.0921273	0.0781546	0.103609	0.064554
1626	1626	0.241248	0.251723	0.0776256	0.0751415	0.0684096	0.198286	0.0974674	0.160484	0.169118	0.0175165	0.14332	0.0779987	0.103509	0.0609863
1627	1627	0.198324	0.250833	0.104229	0.0772128	0.0792551	0.138723	0.105485	0.158474	0.213996	0.0206534	0.158677	0.0754497	0.087712	0.0641711
1628	1628	0.243166	0.228056	0.0905696	0.064042	0.102891	0.136148	0.1851	0.198438	0.154839	0.0382263	0.109756	0.0745551	0.089367	0.0759878
1629	1629	0.242208	0.218612	0.105105	0.0664405	0.0920347	0.154427	0.110958	0.294742	0.106464	0.0218514	0.102209	0.0668563	0.109658	0.0672187
1630	1630	0.252329	0.280137	0.0623197	0.0671296	0.097593	0.173483	0.00274725	0.345526	0.0807071	0.0233294	0.0559284	0.0746401	0.0942184	0.0786773
1631	1631	0.27162	0.198884	0.0654319	0.0436947	0.0990327	0.17149	0.0668258	0.210319	0.128166	0.00421619	0.102828	0.075223	0.116637	0.0624822
1632	1632	0.211862	0.201544	0.0765412	0.0473506	0.0995135	0.179	0.105641	0.163249	0.152367	0.00460472	0.181696	0.0641999	0.118121	0.0648634
1633	1633	0.188932	0.223324	0.097624	0.0454935	0.098997	0.163829	0.120707	0.15241	0.195178	0.0214528	0.0716511	0.0796659	0.123326	0.0625517
1634	1634	0.236806	0.250211	0.0980612	0.0446636	0.101604	0.117171	0.124658	0.170158	0.160976	0.00434464	0.12208	0.084273	0.131178	0.0604396
1635	1635	0.203738	0.245073	0.0961371	0.041866	0.0999608	0.0933869	0.0880206	0.223947	0.0921868	0.0271235	0.133294	0.0953938	0.126157	0.0620333
1636	1636	0.230769	0.224742	0.107753	0.0424093	0.0973312	0.0800249	0.0739767	0.231397	0.0539761	0.0532771	0.119782	0.097981	0.109091	0.0537511
1637	1637	0.207879	0.213412	0.0820378	0.0362954	0.100154	0.0848267	0.0935888	0.211439	0.0492639	0.0614079	-0.033839	0.0792317	0.096789	0.0771487
1638	1638	0.201929	0.185583	0.087935	0.0490031	0.106888	0.0848965	0.0883281	0.170909	0.0298359	0.0198547	0.00987653	0.0760935	0.103929	0.0783833
1639	1639	0.191299	0.163803	0.080185	0.0461651	0.0985586	0.0919198	0.0923121	0.205139	0.0162703	0.0335766	-0.0179641	0.0747075	0.113607	0.0749279
1640	1640	0.139313	0.182453	0.0821567	0.0494838	0.0942546	0.113234	0.0877064	0.269041	0.0181632	0.0271399	-0.0116883	0.0746762	0.106111	0.0763926
1641	1641	0.205976	0.185638	0.0740489	0.0470348	0.118417	0.123736	0.108201	0.221906	0.0224315	0.024824	0.123717	0.067283	0.116633	0.0677564
1642	1642	0.229544	0.212193	0.0779504	0.0530717	0.0930626	0.121252	0.100999	0.129549	0.0677336	0.0775801	0.0419287	0.0730208	0.116795	0.082903
1643	1643	0.218914	0.253311	0.0994627	0.051664	0.0697115	0.109009	0.0888325	0.149709	0.112718	0.156745	-0.11	0.0563313	0.110985	0.0783083
1644	1644	0.165019	0.252101	0.0998454	0.0440763	0.0624	0.0811164	0.108156	0.206562	0.132713	0.0228109	-0.142857	0.0503262	0.110995	0.0775194
1645	1645	0.197716	0.193077	0.131767	0.0567376	0.0749881	0.0742414	0.136933	0.213652	0.161544	0.0104115	-0.0870712	0.0537931	0.115206	0.0850662
1646	1646	0.18209	0.194834	0.106524	0.0578455	0.0727988	0.0714132	0.201798	0.196471	0.147123	-0.0404172	0.108661	0.0619706	0.0995169	0.080732
1647	1647	0.214396	0.189016	0.11974	0.0656316	0.0801862	0.0799212	0.229914	0.184624	0.0922037	-0.0179242	0.062201	0.0654724	0.121655	0.086656
1648	1648	0.186633	0.165442	0.117841	0.0623656	0.0938995	0.0831111	0.182482	0.15734	0.0904522	0.0217017	0.129239	0.0802891	0.14235	0.0730506
1649	1649	0.218143	0.206538	0.0859574	0.0389337	0.0788352	0.0780637	0.175394	0.131617	0.0776993	0.0160619	0.0744467	0.0794003	0.121737	0.0891197
1650	1650	0.300316	0.218057	0.0863768	0.0255942	0.092257	0.0821918	0.156787	0.14383	0.129799	0.0164103	0.170915	0.0845861	0.126378	0.084276
1651	1651	0.22109	0.204252	0.0685898	0.0431894	0.0900901	0.0877897	0.117959	0.198516	0.118018	0.0054783	0.075969	0.0775988	0.139522	0.0764998
1652	1652	0.164706	0.205024	0.0456407	0.0552391	0.103495	0.0772588	0.101916	0.249773	0.180175	0.0268587	0.080597	0.0718685	0.123614	0.0669693
1653	1653	0.16979	0.200721	0.043415	0.0586236	0.0948806	0.0889523	0.0998363	0.241249	0.125835	0.0253584	0.0468489	0.0850462	0.094632	0.0654206
1654	1654	0.17672	0.205357	0.0348189	0.0932203	0.0893588	0.0879193	0.109136	0.180723	0.182255	0.0207967	0.0762688	0.0819796	0.0936853	0.0779148
1655	1655	0.159686	0.178775	0.0262541	0.0793564	0.0819786	0.0784103	0.102114	0.199735	0.215122	0.0336392	0.146203	0.0833333	0.0990466	0.0734683
1656	1656	0.141379	0.201875	0.0121284	0.100784	0.104626	0.106858	0.143072	0.166268	0.197647	0.0244386	0.118812	0.0853052	0.0916508	0.0839526
1657	1657	0.203737	0.218282	0.0283042	0.0797872	0.0945386	0.136625	0.112046	0.253922	0.148107	0.0163613	0.131844	0.0835126	0.108806	0.0701706
1658	1658	0.141849	0.258699	0.0376283	0.081891	0.106704	0.162985	0.101143	0.241639	0.17457	0.0128118	0.109295	0.0795725	0.102011	0.0493702
1659	1659	0.112119	0.202355	0.0747331	0.0780883	0.104596	0.198913	0.0715746	0.262243	0.153449	0.00914076	0.0750988	0.0779619	0.0897645	0.0656466
1660	1660	0.0904509	0.258409	0.0586807	0.0790802	0.0851789	0.217004	0.0204546	0.219711	0.104134	0.00732066	0.12	0.0816327	0.111504	0.0726625
1661	1661	0.229402	0.277108	0.0295445	0.0738998	0.0883761	0.197858	0.036963	0.212984	0.147554	0.0134493	0.0705775	0.0858151	0.0937638	0.0862217
1662	1662	0.2865	0.254359	0.0272964	0.0701801	0.0856134	0.207061	0.0384024	0.212637	0.159533	-0.0102095	0.153401	0.0906229	0.102958	0.070799
1663	1663	0.264368	0.247855	0.0442392	0.0736244	0.0955302	0.191451	0.0676787	0.17033	0.195062	0.0088287	0.0960549	0.0850824	0.108114	0.0757261
1664	1664	0.245828	0.261353	0.0236372	0.0573833	0.101437	0.191527	0.0806011	0.158751	0.182027	0.0140845	0.0286426	0.0725894	0.0911345	0.0832696
1665	1665	0.292231	0.219742	0.0524862	0.0677507	0.0776294	0.191147	0.0908065	0.174061	0.195943	0.0170105	-0.0366864	0.0869655	0.0924627	0.0685567
1666	1666	0.275091	0.246473	0.0377758	0.0792683	0.063216	0.181202	0.0572252	0.221053	0.190588	0.0164179	0.142412	0.0858137	0.104451	0.0636032
1667	1667	0.260646	0.225756	0.0206847	0.105035	0.069281	0.158659	0.0558242	0.143891	0.172283	0.0382979	0.0999237	0.0831354	0.112557	0.058244
1668	1668	0.265203	0.23375	0.027846	0.0811808	0.0853122	0.110955	0.084161	0.122964	0.152824	-0.0124792	0.131241	0.0689869	0.104089	0.0601177
1669	1669	0.253438	0.241292	0.0727651	0.0737979	0.104846	0.136763	0.067659	0.16063	0.143995	0.0247997	0.138272	0.0779705	0.0936281	0.0738015
1670	1670	0.240275	0.210759	0.0527749	0.081255	0.100307	0.159292	0.073751	0.250213	0.120141	0.0181397	0.0736698	0.0689091	0.114968	0.0747736
1671	1671	0.237427	0.219958	0.109386	0.0746822	0.104977	0.179756	0.0851064	0.304753	0.138462	0.0240202	0.0616949	0.0603282	0.108906	0.0661083
1672	1672	0.265677	0.23887	0.0888469	0.0599448	0.101254	0.177719	0.0765064	0.244761	0.210172	0.0189125	0.119228	0.0659656	0.125696	0.0561151
1673	1673	0.245064	0.23482	0.127246	0.0569557	0.117742	0.186149	0.113801	0.19818	0.153016	0.0187735	0.134139	0.0757513	0.141965	0.0646388
1674	1674	0.198247	0.261538	0.0854794	0.0383912	0.103397	0.170764	0.11632	0.17005	0.165829	0.0316317	0.120798	0.0594744	0.13198	0.058114
1675	1675	0.253819	0.230394	0.12142	0.043688	0.0901287	0.143741	0.106204	0.174477	0.168097	0.0105192	0.17753	0.0862884	0.116623	0.0615469
1676	1676	0.231666	0.247856	0.083004	0.0482759	0.105173	0.105925	0.136377	0.174735	0.15884	0.0326889	0.146002	0.088086	0.101218	0.0701026
1677	1677	0.263124	0.204385	0.105944	0.0403638	0.118723	0.0841863	0.128962	0.157432	0.0665492	0.0611523	0.107095	0.0695837	0.100197	0.0523354
1678	1678	0.223723	0.187092	0.0873717	0.0427299	0.0940116	0.0771383	0.108664	0.190496	0.0705128	0.082779	0.00738006	0.0734223	0.11633	0.0562867
1679	1679	0.217986	0.194387	0.0841783	0.0522918	0.10746	0.0713455	0.10773	0.201455	0.000374904	0.0668296	-0.0256959	0.07522	0.1187	0.0610065
1680	1680	0.237713	0.222462	0.0819231	0.0450213	0.0952233	0.0882353	0.126638	0.263381	0.0148987	0.0336367	-0.002457	0.0766046	0.105873	0.0650453
1681	1681	0.22007	0.226344	0.0721329	0.0557111	0.0937029	0.0936678	0.0926099	0.297964	0.00905563	0.0467289	-0.0618893	0.0631787	0.11561	0.0888502
1682	1682	0.250597	0.234494	0.0832315	0.0435042	0.0928472	0.103463	0.0920771	0.246114	0.00998425	0.0333333	0.0663176	0.0672332	0.106166	0.073738
1683	1683	0.229345	0.268908	0.0745218	0.0554058	0.0944659	0.126021	0.028133	0.168047	0.0306956	0.0237685	-0.0485714	0.0607421	0.125092	0.0794646
1684	1684	0.262115	0.241963	0.0890907	0.0512508	0.0723306	0.0793296	0.0734095	0.165982	0.0691189	0.0620939	-0.124183	0.0501859	0.113034	0.0697674
1685	1685	0.241709	0.216704	0.101392	0.0389375	0.0735456	0.0722283	0.135527	0.214096	0.121652	0.0946619	-0.104235	0.061762	0.101161	0.0754286
1686	1686	0.271246	0.194996	0.139592	0.0313178	0.0704479	0.0738575	0.188584	0.205267	0.154596	0.0217472	-0.0805453	0.0658374	0.115308	0.0806271
1687	1687	0.259768	0.212077	0.151352	0.0483718	0.0675068	0.0740022	0.196822	0.183212	0.158247	0.0106316	0.112793	0.0811786	0.116063	0.0793991
1688	1688	0.27924	0.196361	0.111857	0.0648276	0.0763873	0.084	0.155369	0.14948	0.1169	-0.0417036	0.0873494	0.0823308	0.122883	0.0681004
1689	1689	0.239007	0.199541	0.092038	0.0669014	0.0913254	0.0760209	0.124324	0.139503	0.120191	-0.0261873	0.11529	0.0681481	0.142091	0.074043
1690	1690	0.258435	0.21729	0.100351	0.0454546	0.0855508	0.0867179	0.159129	0.139379	0.137778	0.00150605	0.0823084	0.0672237	0.126192	0.0968992
1691	1691	0.254887	0.202978	0.0692137	0.037464	0.101086	0.0911077	0.182807	0.103691	0.159826	0.000701766	0.179856	0.074377	0.113971	0.0793374
1692	1692	0.299046	0.209619	0.0711983	0.0419518	0.0818213	0.0642476	0.151626	0.0875362	0.136812	0.0224408	0.0283333	0.069288	0.101563	0.0755915
1693	1693	0.150585	0.192185	0.0401551	0.0484055	0.103213	0.0834414	0.130543	0.193767	0.128751	0.0178086	0.081328	0.0772762	0.115385	0.0714922
1694	1694	0.1217	0.201845	0.0472103	0.0463015	0.0942886	0.07432	0.122125	0.281013	0.17706	0.0328268	0.0886968	0.0816879	0.13617	0.0802372
1695	1695	0.131634	0.200295	0.0360764	0.0801927	0.0759837	0.0757872	0.106354	0.251376	0.12322	0.0424543	0.112163	0.0848287	0.102658	0.0666667
1696	1696	0.183139	0.185504	0.0203979	0.101466	0.104181	0.12449	0.134058	0.202178	0.13089	0.0229592	0.161454	0.0882415	0.0963241	0.0904302
1697	1697	0.103721	0.171108	0.0151632	0.0727562	0.10648	0.13544	0.12357	0.118933	0.116279	0.00944033	0.0700152	0.096013	0.100023	0.0671959
1698	1698	0.100398	0.2	0.00890985	0.0670294	0.118789	0.153365	0.100283	0.203909	0.160043	0.00102983	0.107356	0.0855551	0.0813552	0.0768049
1699	1699	0.125172	0.197981	0.0310155	0.0678733	0.107715	0.180828	0.095636	0.227935	0.112305	0.0140746	0.0835073	0.0786157	0.113763	0.06759
1700	1700	0.227057	0.237242	0.0426202	0.0609726	0.0982368	0.189385	0.077266	0.220673	0.103774	0.0392012	0.115418	0.0870746	0.106918	0.0801354
1701	1701	0.22321	0.241929	0.0248776	0.0531732	0.111014	0.195146	0.098772	0.204819	0.16188	0.0150057	0.112187	0.0858034	0.107558	0.074711
1702	1702	0.258591	0.248465	0.030099	0.0481809	0.111673	0.200793	0.116645	0.191591	0.157579	0.0316279	0.139946	0.0918681	0.0965853	0.0734121
1703	1703	0.258936	0.271849	0.0391459	0.0462312	0.124044	0.204909	0.107189	0.212938	0.207704	0.00164747	0.115254	0.0945657	0.0941019	0.0720259
1704	1704	0.250903	0.257992	0.0234637	0.0643565	0.0872858	0.206759	0.106312	0.185584	0.182814	0.0356112	0.0387779	0.0858669	0.0912829	0.0784155
1705	1705	0.291331	0.211025	0.0462046	0.0609846	0.0926594	0.185078	0.105118	0.203568	0.197046	0.0189027	-0.00798176	0.07221	0.12343	0.0758281
1706	1706	0.275447	0.253486	0.0242215	0.0846277	0.0812395	0.110906	0.1	0.161927	0.167468	0.00543477	0.140613	0.0757966	0.121728	0.0621286
1707	1707	0.304543	0.237675	0.0331984	0.10035	0.0795604	0.101039	0.0956409	0.140496	0.156775	0.0291096	0.106105	0.0881256	0.111111	0.0721812
1708	1708	0.268315	0.233107	0.0681199	0.0758331	0.0943912	0.104471	0.111748	0.145006	0.141169	-0.0168321	0.154044	0.0815722	0.11092	0.0625355
1709	1709	0.234875	0.221957	0.0656517	0.0756817	0.111007	0.121165	0.120225	0.177618	0.138141	0.00038566	0.136022	0.0670821	0.114507	0.0766106
1710	1710	0.264368	0.211411	0.06285	0.0933408	0.114209	0.164342	0.0464396	0.185709	0.114451	0.0279938	0.0954774	0.0639157	0.126739	0.0721826
1711	1711	0.257689	0.254569	0.0545698	0.113166	0.105077	0.175046	0.0997131	0.237905	0.111111	0.0122003	0.089939	0.0572953	0.152934	0.0667044
1712	1712	0.256098	0.236615	0.070488	0.079467	0.109396	0.188055	0.0807273	0.20938	0.2176	0.00140842	0.0414747	0.0709435	0.138158	0.0633764
1713	1713	0.250789	0.247565	0.0964215	0.0611008	0.100031	0.192637	0.0844084	0.184186	0.157195	0.025889	0.073844	0.0717226	0.0690638	0.0618785
1714	1714	0.21144	0.278539	0.143791	0.0555292	0.108614	0.215521	0.0965587	0.167758	0.172499	0.0428816	0.101109	0.0759493	0.0849261	0.0698448
1715	1715	0.218144	0.228479	0.078195	0.0505631	0.0972569	0.170616	0.10313	0.15528	0.151258	0.0294995	0.180707	0.0884558	0.0940445	0.0653631
1716	1716	0.314493	0.235509	0.0962135	0.0463796	0.104552	0.122425	0.1385	0.20625	0.175107	0.0438305	0.133811	0.0849941	0.106352	0.0614684
1717	1717	0.24024	0.224452	0.0908426	0.0368396	0.0973793	0.090145	0.119149	0.233539	0.0354052	0.0398467	0.114754	0.071506	0.102317	0.0606488
1718	1718	0.241941	0.244582	0.0854191	0.0381935	0.093435	0.0756302	0.104861	0.229225	-0.00574054	0.0619602	0.139263	0.0675742	0.133771	0.0726663
1719	1719	0.239068	0.250211	0.0889154	0.0537985	0.116544	0.0620278	0.134206	0.252574	-0.0752454	0.0589528	0.00225225	0.0648385	0.135299	0.0770111
1720	1720	0.243643	0.241585	0.08439	0.056397	0.116487	0.0729913	0.0923226	0.267434	0.21608	0.0504077	0.00702579	0.064738	0.128186	0.071345
1721	1721	0.261256	0.278424	0.078694	0.0518784	0.0934887	0.0784236	0.13308	0.264286	-0.0790423	0.0547196	0.0223752	0.0646562	0.120404	0.0837617
1722	1722	0.240262	0.27846	0.0917685	0.046072	0.0885582	0.098364	0.138308	0.179866	0.039127	0.0178926	0.0726257	0.0641543	0.110103	0.0692718
1723	1723	0.257181	0.183351	0.0795381	0.0491112	0.100095	0.122756	0.0499469	0.117909	0.0132837	-0.00711878	-0.12275	0.0692771	0.0919948	0.0676648
1724	1724	0.302118	0.201197	0.120175	0.0479638	0.0809276	0.0768215	0.1173	0.143727	0.0480447	0.0511248	-0.135802	0.0908719	0.162682	0.0784198
1725	1725	0.293198	0.200303	0.131329	0.0448757	0.0848842	0.071179	0.126134	0.201044	0.0987149	-0.0192797	-0.1104	0.103912	0.123417	0.0671378
1726	1726	0.292102	0.183908	0.146412	0.0394776	0.0749343	0.0788547	0.17077	0.208904	0.137182	0.00622567	-0.0858726	0.0840976	0.0842561	0.0567613
1727	1727	0.309107	0.199081	0.0890295	0.0330757	0.0732443	0.0943562	0.138514	0.146067	0.146176	0.00855919	0.00904523	0.0645225	0.0940487	0.0846576
1728	1728	0.302609	0.219549	0.0912531	0.0479303	0.0701637	0.0775937	0.177347	0.105809	0.125037	-0.00188086	0.118123	0.0621044	0.144419	0.0723891
1729	1729	0.354268	0.213042	0.0986708	0.0507462	0.0743572	0.0815972	0.169854	0.0957361	0.121443	0.0218562	0.100787	0.065268	0.115946	0.0853417
1730	1730	0.297697	0.191681	0.0775216	0.0535152	0.0659341	0.0813829	0.140873	0.102671	0.152016	0.019899	0.0939044	0.0710937	0.098995	0.0722456
1731	1731	0.272955	0.183415	0.0874587	0.0396976	0.0963737	0.0668629	0.170232	0.11875	0.155683	0.0371913	0.0729805	0.0741331	0.0954294	0.0730701
1732	1732	0.13244	0.213934	0.0398266	0.048943	0.0996407	0.0749893	0.16209	0.174365	0.184869	0.0282729	0.0725599	0.0767964	0.0910565	0.0729006
1733	1733	0.0538443	0.226937	0.0462853	0.0515108	0.104139	0.0783235	0.127027	0.247612	0.13421	0.0308426	0.100495	0.0789752	0.0993657	0.0877433
1734	1734	0.146067	0.193536	0.0248373	0.0902256	0.10124	0.0945318	0.116488	0.251159	0.136333	0.0361121	0.0953237	0.0838247	0.101329	0.0829665
1735	1735	0.153935	0.184405	0.0211996	0.0696531	0.0964689	0.122254	0.104371	0.198545	0.144536	0.0311698	0.0466201	0.0743229	0.0931929	0.100941
1736	1736	0.0794937	0.17777	0.0095037	0.0470914	0.113786	0.129395	0.114286	0.16106	0.145038	0.0413534	0.106274	0.0712379	0.0689841	0.0849546
1737	1737	0.13579	0.213848	0.0160807	0.0509539	0.0809644	0.158521	0.111249	0.180161	0.113799	0.0534351	0.0671989	0.0717927	0.0825722	0.0698467
1738	1738	0.148895	0.224971	0.041858	0.0434988	0.103337	0.163978	0.112069	0.209665	0.150909	0.0238462	0.0680702	0.0767241	0.0731045	0.0692424
1739	1739	0.204327	0.233652	0.028584	0.0300429	0.139188	0.170503	0.100925	0.19574	0.126447	0.0436377	0.0748031	0.0840503	0.0926999	0.0587932
1740	1740	0.221085	0.230533	0.0364552	0.0370012	0.10562	0.175994	0.11305	0.190029	0.141708	0.0481586	0.118662	0.0881421	0.0907169	0.0792053
1741	1741	0.193396	0.259321	0.0262997	0.0416768	0.117207	0.184729	0.114913	0.196226	0.164986	0.0103306	0.0985109	0.0891903	0.0866228	0.0603992
1742	1742	0.21835	0.287534	0.0272053	0.0573004	0.10665	0.207386	0.120249	0.240949	0.147853	0.0379867	0.0766747	0.0801175	0.0995891	0.075
1743	1743	0.235659	0.230139	0.0350957	0.051395	0.0763978	0.200471	0.094196	0.267161	0.149291	0.0126468	-0.00173913	0.0720093	0.107934	0.0754372
1744	1744	0.277108	0.25587	0.0557051	0.0892374	0.0855207	0.148139	0.083412	0.237466	0.202015	-0.009839	0.0695103	0.0808101	0.105219	0.0585879
1745	1745	0.257978	0.268503	0.0258349	0.0570782	0.0789474	0.0935216	0.0850802	0.154496	0.173219	0.00479999	0.0868687	0.0823992	0.115945	0.0714476
1746	1746	0.267285	0.225494	0.0373272	0.069718	0.0887681	0.0875796	0.0829862	0.14972	0.179625	0.0144928	0.123288	0.0748933	0.100522	0.0553463
1747	1747	0.275907	0.216069	0.0370771	0.0903245	0.093473	0.0949304	0.0924946	0.136264	0.159851	0.0104936	0.110461	0.0660358	0.116473	0.05608
1748	1748	0.285144	0.226796	0.0629848	0.0968305	0.109993	0.118974	0.0525351	0.158052	0.0192307	0.0242915	0.117489	0.0715532	0.128271	0.0528553
1749	1749	0.286216	0.278675	0.0635294	0.112269	0.0984183	0.15474	0.0552734	0.179017	0.116883	0.00282143	0.121509	0.067482	0.127665	0.056391
1750	1750	0.242345	0.240033	0.0701755	0.0767244	0.0974803	0.153414	0.076555	0.16897	0.181034	0.00842695	0.0828183	0.0766891	0.114305	0.0586895
1751	1751	0.244426	0.26764	0.0326679	0.0636059	0.0833333	0.161972	0.0990316	0.146797	0.1199	0.0222505	0.0883978	0.0745896	0.104219	0.0717593
1752	1752	0.261832	0.271625	0.0961326	0.050282	0.0955951	0.191544	0.0716824	0.13894	0.195423	0.0308072	0.106888	0.0741613	0.0977362	0.0697406
1753	1753	0.277612	0.238946	0.0752566	0.0694219	0.0903343	0.197327	0.102915	0.205687	0.212417	0.0445775	0.129825	0.0829924	0.0894956	0.0625
1754	1754	0.284331	0.241096	0.0915222	0.0499764	0.0813506	0.159865	0.0954257	0.22963	0.185241	0.0345382	0.147879	0.0757403	0.114681	0.0663207
1755	1755	0.314161	0.217037	0.0866833	0.0324118	0.0975782	0.136221	0.136896	0.188295	-0.0549133	0.0110792	0.154895	0.0650794	0.131073	0.0693295
1756	1756	0.251948	0.191714	0.0811928	0.036172	0.0952494	0.0978836	0.10907	0.257937	-0.091716	0.0404917	0.12137	0.0607762	0.115711	0.078093
1757	1757	0.2112	0.216299	0.0923943	0.0468376	0.0909525	0.0867894	0.0817506	0.242494	-0.0939226	0.0437613	0.0278344	0.0586122	0.12294	0.0791458
1758	1758	0.207376	0.203002	0.0741583	0.0377963	0.115262	0.077476	0.134647	0.213782	-0.0380953	0.0378758	-0.0235018	0.0665138	0.117817	0.0829966
1759	1759	0.238376	0.219914	0.102964	0.0532823	0.100048	0.0648184	0.0896686	0.161667	-0.151302	0.0480414	-0.0157012	0.0758369	0.129057	0.0870248
1760	1760	0.228514	0.188786	0.0830828	0.0543054	0.0809811	0.0825871	0.0832455	0.144068	0.0157658	0.0311594	0.00449237	0.076429	0.126326	0.0741301
1761	1761	0.233525	0.20904	0.136547	0.0407543	0.0897949	0.0918183	0.0896414	0.14054	0.0237251	0.0201895	-0.152542	0.0894276	0.12203	0.0705297
1762	1762	0.247566	0.20714	0.125	0.04	0.0876426	0.0775599	0.123028	0.148781	0.0332063	0.0781693	-0.145136	0.108619	0.05928	0.0742515
1763	1763	0.271357	0.195195	0.124882	0.0516516	0.0831586	0.0876266	0.12369	0.144315	0.05	0.0249465	-0.161392	0.106191	0.0718611	0.0794555
1764	1764	0.253121	0.187266	0.0774381	0.0459214	0.0674009	0.0903495	0.134928	0.149068	0.0803247	0.0271626	-0.0893372	0.0881582	0.0710901	0.0755993
1765	1765	0.266642	0.200899	0.0873929	0.0422812	0.0658989	0.0827556	0.147228	0.0955883	0.0906921	-0.0582167	-0.00118061	0.0742195	0.120731	0.0951926
1766	1766	0.287105	0.223309	0.0699761	0.0309051	0.0719592	0.0845857	0.145482	0.117783	0.08726	0.0363289	0.0877193	0.0705906	0.138007	0.0687738
1767	1767	0.310036	0.205742	0.0393931	0.0329585	0.0670954	0.0810009	0.184196	0.139283	0.144781	0.0435923	0.131054	0.0752564	0.124835	0.0771412
1768	1768	0.304131	0.182476	0.0584453	0.0493141	0.080428	0.0744459	0.195804	0.184228	0.184655	0.0471167	0.11138	0.0772889	0.104049	0.0723404
1769	1769	0.328379	0.201	0.047397	0.0505655	0.0947075	0.0662764	0.192854	0.167442	0.217647	0.0402407	0.109368	0.076954	0.0974729	0.0669443
1770	1770	0.0689902	0.228654	0.0541297	0.0505303	0.0918544	0.0811372	0.13183	0.169787	0.150358	0.0491018	0.0792541	0.086822	0.0980488	0.0787879
1771	1771	0.168044	0.227484	0.020757	0.0668508	0.0869258	0.0845792	0.132621	0.223443	0.181191	0.0310345	0.156218	0.0904968	0.0991808	0.0842214
1772	1772	0.125177	0.205531	0.0262346	0.0505204	0.1022	0.124971	0.137841	0.188144	0.125333	0.034188	0.0775477	0.0786195	0.0941426	0.0913529
1773	1773	0.129447	0.198041	0.00754227	0.0381451	0.108631	0.135662	0.102022	0.207198	0.120988	0.0450804	0.0583136	0.0753311	0.0991575	0.0917241
1774	1774	0.163818	0.238636	0.03027	0.0395092	0.11004	0.143344	0.103528	0.210461	0.122117	0.0076726	0.0655376	0.0821918	0.105048	0.0590621
1775	1775	0.199179	0.230376	-0.0078038	0.0361446	0.0925633	0.13776	0.0979342	0.234344	0.111444	0.0492594	0.0489354	0.0786468	0.132497	0.0670978
1776	1776	0.226433	0.229136	0.0316456	0.0355226	0.102091	0.157895	0.106811	0.207846	0.136759	0.0453421	0.0587002	0.0738875	0.0869943	0.0850889
1777	1777	0.185581	0.218116	0.0325119	0.0331992	0.102461	0.152931	0.102757	0.188034	0.175522	0.0332594	0.0542745	0.0829228	0.0798054	0.0631055
1778	1778	0.213519	0.221012	0.0422119	0.045477	0.108635	0.145204	0.108434	0.245345	0.178658	0.0138107	0.0999175	0.0728314	0.0983089	0.0715388
1779	1779	0.19542	0.235477	0.0171361	0.0529865	0.109159	0.160339	0.0933063	0.223783	0.134359	0.0123457	0.0806065	0.075	0.0908737	0.068389
1780	1780	0.213808	0.223316	0.0302538	0.0717609	0.0821414	0.165229	0.0994421	0.25614	0.20071	-0.00220556	0.0896552	0.0731903	0.115643	0.0548379
1781	1781	0.234965	0.222359	0.0561619	0.0587682	0.0897436	0.126447	0.0916721	0.23519	0.18742	0.0099889	0.126531	0.0826165	0.115697	0.0543641
1782	1782	0.257929	0.246312	0.0330435	0.0510154	0.105524	0.11184	0.0815395	0.167321	0.179945	0.0219298	0.157965	0.077106	0.128331	0.0614973
1783	1783	0.2632	0.212826	0.0254635	0.0843237	0.113253	0.0904311	0.100372	0.162565	0.148673	0	0.0994917	0.0602644	0.114091	0.0575209
1784	1784	0.28357	0.217706	0.0370193	0.0672908	0.100779	0.0933073	0.0927904	0.147839	0.0714286	0.00202181	0.16041	0.0654134	0.123775	0.0577663
1785	1785	0.302286	0.217527	0.0439731	0.0626229	0.0954479	0.124306	0.0774818	0.198121	0.197145	-0.00838417	0.0856672	0.0685748	0.124005	0.0649895
1786	1786	0.29682	0.27551	0.0570539	0.0437956	0.0844548	0.139369	0.0751773	0.210789	0.189373	-0.00991502	0.0547645	0.0711349	0.099343	0.0672827
1787	1787	0.25209	0.219969	0.0550789	0.0563302	0.091318	0.159983	0.102527	0.132431	0.167232	0.00102777	0.0588713	0.0671507	0.0892651	0.068836
1788	1788	0.267569	0.238286	0.0500777	0.0479911	0.0970483	0.169288	0.0741908	0.139161	0.152772	0.025457	0.10702	0.0778004	0.106659	0.0732919
1789	1789	0.267508	0.202871	0.0666211	0.0607702	0.0965692	0.16757	0.0993753	0.164655	0.228705	0.023484	0.0494079	0.0659155	0.122043	0.0655836
1790	1790	0.265455	0.199451	0.0585416	0.0561177	0.0845243	0.176368	0.103334	0.198675	0.0988764	-0.00372302	0.128137	0.0468577	0.113541	0.0628779
1791	1791	0.309589	0.191223	0.0879619	0.0375185	0.0864461	0.167	0.152462	0.211803	-0.100464	0.013363	0.164823	0.0478469	0.105461	0.0646208
1792	1792	0.300523	0.203484	0.10941	0.0307487	0.0847758	0.172599	0.130984	0.241935	-0.0650155	0.0556178	0.119572	0.0633528	0.135013	0.0735957
1793	1793	0.219396	0.186078	0.105735	0.0364963	0.0824788	0.130435	0.0923567	0.232685	-0.0745342	0.0514844	0.0689482	0.0649168	0.13841	0.071592
1794	1794	0.235568	0.185657	0.100751	0.0345694	0.0842607	0.0982085	0.0829208	0.220577	-0.0638298	0.0783866	0.054722	0.0711297	0.132689	0.0821256
1795	1795	0.231324	0.218415	0.104371	0.0524747	0.0834871	0.0758564	0.110946	0.189597	-0.0408432	0.0572229	0.123382	0.0737423	0.1155	0.0859278
1796	1796	0.258209	0.236576	0.156519	0.0522816	0.0951843	0.062735	0.0876882	0.145884	-0.00801168	-0.015953	0.057164	0.0904862	0.110368	0.0852905
1797	1797	0.252731	0.205303	0.111461	0.0515837	0.101129	0.0708415	0.070615	0.208075	-0.00245872	0.0175732	-0.07739	0.101619	0.131434	0.0665062
1798	1798	0.267341	0.218426	0.124627	0.0472155	0.102498	0.0883822	0.018598	0.161812	0.0281057	0.0659468	-0.0914634	0.096364	0.114708	0.0870908
1799	1799	0.260226	0.20952	0.0810366	0.0383318	0.0886908	0.0748065	0.0744416	0.210967	0.0544863	0.033357	-0.114458	0.09032	0.0926539	0.0873221
1800	1800	0.235616	0.199251	0.0640738	0.0501693	0.0827937	0.0738624	0.113262	0.167895	0.0456009	0.0218229	-0.0754717	0.0853436	0.0789263	0.0731707
1801	1801	0.22611	0.216923	0.0683123	0.0521571	0.0751698	0.0835625	0.20268	0.110902	0.0468577	0.0629125	0.0251142	0.0850761	0.112152	0.0953423
1802	1802	0.252371	0.198089	0.0519444	0.0444949	0.0666106	0.0728145	0.164927	0.119483	0.141593	0.0571956	0.0573248	0.0828509	0.0795482	0.0951062
1803	1803	0.275277	0.178992	0.0823937	0.062438	0.11716	0.0663644	0.147456	0.211594	0.186687	0.0427273	0.0898458	0.0845015	0.106203	0.0749774
1804	1804	0.281372	0.204658	0.0438886	0.0559891	0.109218	0.0754167	0.160251	0.267099	0.148915	0.0285467	0.0671113	0.0787309	0.105463	0.0760198
1805	1805	0.295958	0.222678	0.0360214	0.0575984	0.122292	0.0783544	0.106674	0.197892	0.18922	0.0259027	0.0985556	0.0757848	0.0937046	0.0713838
1806	1806	0.145574	0.198556	0.0251036	0.0510836	0.105558	0.0977282	0.0823028	0.133998	0.153105	0.0191543	0.0888031	0.0855626	0.0915343	0.0759032
1807	1807	0.159072	0.223903	0.0189346	0.0351582	0.0903886	0.124638	0.0807974	0.146088	0.115789	0.0461538	0.0765648	0.0860193	0.086908	0.0832455
1808	1808	0.180659	0.195742	0.0228079	0.0352094	0.100478	0.116352	0.0975784	0.157126	0.0997358	0.0313685	0.0699862	0.0831785	0.0900816	0.0962528
1809	1809	0.253852	0.217121	0.0392365	0.0447198	0.0931035	0.124171	0.109579	0.169063	0.134519	0.0502989	0.0810811	0.0866667	0.0962328	0.0821123
1810	1810	0.25503	0.213012	-0.0183411	0.0455044	0.0972477	0.123581	0.106367	0.20081	0.1895	0.0496894	0.0821513	0.0960643	0.0798061	0.0647676
1811	1811	0.259813	0.2052	0.0520882	0.0367369	0.111858	0.129788	0.112156	0.25216	0.220364	-0.00736379	0.0687831	0.0715039	0.0802768	0.0711688
1812	1812	0.263425	0.221989	0.0162422	0.0538441	0.11576	0.119026	0.104769	0.237742	0.218313	0.0113805	0.09257	0.0711056	0.10022	0.0684073
1813	1813	0.268398	0.191757	0.0486509	0.0486961	0.101521	0.120995	0.129515	0.172208	0.163829	0.0135135	0.037037	0.0767677	0.10214	0.056028
1814	1814	0.26696	0.221998	-0.00038896	0.0618016	0.114127	0.135135	0.16129	0.219512	0.220025	0.00893239	0.038806	0.0750665	0.115209	0.061127
1815	1815	0.221295	0.263541	0.0447525	0.0605845	0.107314	0.130473	0.103175	0.197495	0.165049	0.0313306	0.0906747	0.0833686	0.117955	0.0740559
1816	1816	0.180339	0.228726	0.069251	0.0518662	0.117156	0.131567	0.0923695	0.177996	0.166129	0.0249385	0.147962	0.0712008	0.103808	0.0569313
1817	1817	0.199862	0.266783	0.0454634	0.0671321	0.104318	0.115403	0.107599	0.172198	0.157639	0.00866425	0.167031	0.070863	0.116434	0.0678733
1818	1818	0.259553	0.219841	0.0416151	0.0595909	0.0940171	0.117377	0.113881	0.163816	0.131229	0.0280172	0.118126	0.0661284	0.116562	0.0604724
1819	1819	0.274809	0.208853	0.0181227	0.0612358	0.08161	0.113576	0.0787589	0.194191	0.213094	0.0115883	0.0989899	0.0648045	0.100605	0.0717431
1820	1820	0.262948	0.222307	0.0444444	0.0413055	0.0735931	0.113833	0.0835158	0.201284	0.143603	0.00731867	0.172821	0.0776791	0.101369	0.082595
1821	1821	0.263115	0.208082	0.0564496	0.0355417	0.0782682	0.138578	0.106814	0.202756	0.144743	0.0143416	0.109055	0.0714148	0.0981722	0.0722596
1822	1822	0.257069	0.251975	0.0720251	0.0316395	0.0779748	0.140093	0.0924081	0.134315	0.152493	0.00201752	0.110939	0.0674523	0.107064	0.0855326
1823	1823	0.297662	0.178157	0.0696186	0.0406272	0.0848233	0.151304	0.105449	0.143113	0.204839	0.008726	0.0926401	0.0657568	0.107371	0.0545339
1824	1824	0.295119	0.192308	0.0606633	0.0619335	0.0797572	0.16316	0.08739	0.162814	0.0565553	-0.0131665	0.136384	0.0491632	0.119754	0.0636922
1825	1825	0.300705	0.200991	0.117856	0.0230252	0.0918367	0.17673	0.0982405	0.183352	-0.0602056	0.0190716	0.172818	0.0567961	0.122858	0.0693197
1826	1826	0.325386	0.196209	0.13312	0.0364431	0.0971377	0.18158	0.127753	0.230954	-0.0317241	0.0180146	0.127492	0.0619788	0.118607	0.0736571
1827	1827	0.311979	0.230203	0.0994258	0.036989	0.105888	0.177612	0.114155	0.267744	0.00783875	0.0338416	0.075703	0.0725825	0.116258	0.0749834
1828	1828	0.283632	0.208791	0.128274	0.0490634	0.0835673	0.145631	0.0794003	0.264234	-0.0110974	0.0696992	-0.0580986	0.0750055	0.111771	0.0917431
1829	1829	0.305887	0.277529	0.120888	0.0463496	0.0830505	0.108434	0.11262	0.228508	-0.0196937	0.0675453	-0.0301508	0.105736	0.127047	0.0813615
1830	1830	0.221947	0.241463	0.103864	0.0472155	0.104457	0.0738282	0.0863477	0.159509	-0.0032787	-0.00315741	0.0276046	0.0859466	0.122725	0.0775695
1831	1831	0.185185	0.210777	0.107222	0.0511823	0.0884415	0.0623774	0.10052	0.18683	0.0126693	0.0684597	-0.0669975	0.0775879	0.0966154	0.07986
1832	1832	0.197721	0.207151	0.0454971	0.0482218	0.0956561	0.0731	0.0169491	0.184279	0.0108538	0.0863204	-0.0489131	0.0766438	0.0860421	0.0828441
1833	1833	0.205354	0.206782	0.0694341	0.0537897	0.0914127	0.0608262	0.043787	0.156695	0.0404984	0.0308908	-0.00125154	0.085692	0.0817477	0.0793011
1834	1834	0.257164	0.217906	0.0569653	0.0487805	0.0995261	0.0719469	0.101887	0.2003	0.0555238	0.0419048	0.0603175	0.0798286	0.104856	0.0621255
1835	1835	0.230938	0.177603	0.0547757	0.0440135	0.0821478	0.073602	0.155834	0.172073	0.14883	0.0370981	0.0178444	0.0912795	0.143875	0.0734706
1836	1836	0.277135	0.18794	0.0471992	0.0495283	0.098247	0.0730016	0.124088	0.189306	0.14947	0.0397577	0.0716946	0.0902677	0.102385	0.0853739
1837	1837	0.258982	0.181246	0.0436195	0.0436566	0.113253	0.0750566	0.128333	0.171448	0.140528	0.0522088	0.0790732	0.0880361	0.1	0.065152
1838	1838	0.235784	0.177638	0.0371655	0.0522959	0.0928007	0.076859	0.0707532	0.194517	0.123371	0.0559187	0.0339755	0.0793259	0.0985556	0.0854139
1839	1839	0.21482	0.187603	0.0335802	0.029785	0.09643	0.108253	0.0709542	0.15841	0.107182	0.0473048	0.0833333	0.0777034	0.113327	0.0645909
1840	1840	0.228113	0.1918	0.0125818	0.0315155	0.0914798	0.123123	0.0866426	0.0945946	0.0978261	0.0423992	0.0616802	0.0838684	0.121229	0.0782123
1841	1841	0.285303	0.184753	0.0275689	0.0314031	0.0894906	0.109705	0.100424	0.0769741	0.0961474	0.0399429	0.0704385	0.0812	0.103509	0.082744
1842	1842	0.270321	0.236457	0.0207792	0.0319338	0.0930745	0.1133	0.105977	0.10591	0.127052	0.0264681	0.0695187	0.0728155	0.0712329	0.0776381
1843	1843	0.274304	0.234375	0.0234767	0.0447072	0.0827971	0.117194	0.130196	0.119743	0.15957	0.016835	0.09521	0.0753466	0.0792042	0.0712788
1844	1844	0.279895	0.203353	0.029563	0.0507042	0.120482	0.150294	0.13264	0.140345	0.152695	0.0617647	0.106796	0.0787309	0.0952471	0.063961
1845	1845	0.257758	0.221053	0.0205729	0.0410124	0.11037	0.151197	0.142512	0.164343	0.167079	-0.0134481	0.0631145	0.0716951	0.0878165	0.0623752
1846	1846	0.282547	0.178777	0.0403494	0.0518792	0.0862588	0.129941	0.138372	0.199521	0.22011	0.00993884	0.0416275	0.0715428	0.130207	0.0578231
1847	1847	0.239729	0.208438	0.0333996	0.0541101	0.0883591	0.126106	0.141247	0.18802	0.16185	0.0337079	0.0496066	0.0737606	0.111848	0.0646479
1848	1848	0.236158	0.250993	0.055533	0.0672431	0.0954095	0.127682	0.108137	0.229544	0.209717	0.031572	0.0521708	0.0770199	0.114919	0.0700214
1849	1849	0.20014	0.215993	0.0632459	0.0733718	0.0948783	0.133967	0.0875644	0.195363	0.160684	0.0172295	0.0566038	0.0786932	0.106154	0.0678908
1850	1850	0.205591	0.213588	0.0454545	0.0791367	0.0936223	0.115215	0.0836712	0.174461	0.16633	0.0366022	0.109756	0.0755871	0.122484	0.0611621
1851	1851	0.253908	0.21813	0.0612701	0.0572146	0.0889724	0.128534	0.0536585	0.163864	0.186233	0.0071746	0.0537408	0.0823984	0.100084	0.0676455
1852	1852	0.254552	0.246061	0.063327	0.0413943	0.0971828	0.123957	0.134221	0.182416	0.104959	-0.00713075	0.118084	0.0756518	0.0992132	0.0823798
1853	1853	0.29227	0.231804	0.0729141	0.0398572	0.0908694	0.126014	0.0893971	0.213042	0.128363	-0.00374533	0.103022	0.0806084	0.0957346	0.0663961
1854	1854	0.242187	0.198559	0.0441324	0.0248884	0.0856072	0.118679	0.0536672	0.189427	0.234272	-0.0169747	0.0878938	0.078381	0.0896499	0.0718673
1855	1855	0.289743	0.210799	0.049591	0.0394997	0.0833505	0.122829	0.0628803	0.159394	0.170125	-0.00629425	0.109367	0.0745417	0.104514	0.0665809
1856	1856	0.264765	0.201777	0.0555262	0.0581353	0.092043	0.12603	0.0863636	0.160652	0.0304635	0.0103014	0.144297	0.065721	0.104058	0.0776377
1857	1857	0.258864	0.258736	0.0946614	0.0342946	0.0902512	0.138388	0.119369	0.208289	-0.0182328	0.00544745	0.187458	0.0679435	0.102518	0.0815163
1858	1858	0.265784	0.207758	0.103508	0.0433039	0.0729392	0.164424	0.102618	0.247325	0.0295983	0.0304183	0.157673	0.0709382	0.0935252	0.0831401
1859	1859	0.274765	0.236588	0.104539	0.051282	0.0757039	0.178596	0.12357	0.227485	0.109721	0.0428265	0.0928962	0.0719832	0.105171	0.084207
1860	1860	0.237072	0.221532	0.117709	0.0508156	0.0860927	0.177241	0.0961348	0.219613	0.0356589	0.0840708	0.0663469	0.103539	0.11381	0.0912139
1861	1861	0.213538	0.210873	0.089321	0.0543071	0.0857508	0.158252	0.101875	0.21978	0.117674	0.0763723	0.0733083	0.0783373	0.112256	0.0817942
1862	1862	0.157567	0.196219	0.0307414	0.0498623	0.0950413	0.106022	0.087013	0.194544	0.0960748	-0.00897959	0.026087	0.0740151	0.114951	0.0869419
1863	1863	0.175923	0.184632	0.0578473	0.053223	0.0914337	0.0760719	0.044374	0.209302	0.134908	0.0534351	-0.00742313	0.0718274	0.135415	0.0958712
1864	1864	0.237682	0.186452	0.0484067	0.0490082	0.0894345	0.0720426	0.0633803	0.206867	-0.0366848	0.093185	0.0320078	0.0754148	0.115279	0.0896359
1865	1865	0.287866	0.17748	0.0629079	0.0580838	0.0920905	0.072923	0.102415	0.168986	0.0215472	0.0436893	0.154457	0.0651967	0.105331	0.102154
1866	1866	0.266611	0.188533	0.0548766	0.0493	0.09375	0.06325	0.150494	0.183707	0.095216	0.0411074	0.0492021	0.0788581	0.0713601	0.0663957
1867	1867	0.221225	0.178415	0.0417931	0.0515273	0.104794	0.0715746	0.139148	0.150127	0.0788043	0.0439883	0.0941915	0.0821635	0.0905713	0.0680796
1868	1868	0.196395	0.169442	0.0346182	0.0417178	0.106883	0.0872901	0.0585464	0.13601	0.118971	0.0181406	0.0600683	0.080135	0.111244	0.0702479
1869	1869	0.216985	0.186239	0.0372915	0.0289629	0.111969	0.104586	0.0621242	0.133089	0.126057	0.0254351	0.0464691	0.0850052	0.108903	0.0790306
1870	1870	0.261926	0.17138	0.017163	0.0332378	0.0932862	0.113983	0.0666236	0.0893434	0.114634	0.0508366	0.103203	0.0879099	0.0931758	0.0745739
1871	1871	0.320487	0.19308	0.0224464	0.0377249	0.0896427	0.10889	0.0562459	0.0704007	0.172158	0.0382023	0.112066	0.0921903	0.103023	0.0857346
1872	1872	0.305597	0.232376	0.0119729	0.0442378	0.0934553	0.121961	0.0703297	0.0911229	0.139901	0.0629252	0.0779461	0.0738405	0.107477	0.0771028
1873	1873	0.309367	0.254794	0.0265396	0.0557359	0.0974768	0.132525	0.105934	0.101302	0.132712	0.0472934	0.0955727	0.0696637	0.102144	0.0749476
1874	1874	0.315423	0.239607	0.0121012	0.0468535	0.0862471	0.147623	0.11955	0.116533	0.189116	-0.0467571	0.0542784	0.0795782	0.109504	0.0568475
1875	1875	0.262622	0.239362	0.0680071	0.0518401	0.0893653	0.164989	0.13193	0.124144	0.201742	0.0231608	0.0386953	0.0805036	0.114754	0.0547809
1876	1876	0.282634	0.181658	0.0494217	0.0464459	0.0942754	0.146578	0.134245	0.130006	0.175572	0.0276884	0.0483298	0.0705347	0.117262	0.0616455
1877	1877	0.244952	0.189679	0.0811957	0.079805	0.0862248	0.120507	0.116262	0.157895	0.202522	0.0298851	0.0769231	0.0711409	0.113623	0.0701431
1878	1878	0.216471	0.220583	0.096747	0.100179	0.0811793	0.0989358	0.119641	0.152228	0.186655	0.0177317	0.0444548	0.0688809	0.126458	0.0760844
1879	1879	0.222266	0.224793	0.0812775	0.0904271	0.0906883	0.111384	0.17744	0.163437	0.170637	0.0197655	0.123702	0.0668454	0.108863	0.0832033
1880	1880	0.208596	0.25599	0.069307	0.0369961	0.0805411	0.111157	0.0413333	0.157258	0.157173	-0.00706058	0.0365252	0.068504	0.130561	0.0780104
1881	1881	0.247227	0.26024	0.101353	0.0365297	0.0788382	0.123374	0.091869	0.18553	0.134173	0	0.125862	0.0768312	0.101836	0.0789012
1882	1882	0.27186	0.240646	0.128974	0.0418712	0.0847162	0.113093	0.0979955	0.158658	0.185403	0.0062569	0.174939	0.0844338	0.109709	0.0770558
1883	1883	0.288945	0.223027	0.0950772	0.0275566	0.0858241	0.134429	0.115727	0.148557	0.123153	-0.00341588	0.148725	0.0781161	0.111658	0.0673737
1884	1884	0.220476	0.190912	0.0611578	0.0467412	0.0810121	0.114781	0.0608538	0.157628	0.0411687	0.0103008	0.135876	0.081493	0.127347	0.0822827
1885	1885	0.26144	0.226436	0.0425636	0.0572973	0.0898331	0.116126	0.0847897	0.167391	-0.00536197	0.0374204	0.0908059	0.0747195	0.119939	0.0630988
1886	1886	0.227805	0.228571	0.0813699	0.07828	0.0845648	0.116167	0.138344	0.235714	0.0508905	-0.015873	0.166773	0.077484	0.110826	0.076606
1887	1887	0.24227	0.189854	0.105959	0.0533477	0.078826	0.120935	0.146667	0.211829	0.0418782	0.0266445	0.142663	0.0851433	0.091509	0.0737541
1888	1888	0.23765	0.235669	0.0766074	0.0591837	0.0821436	0.145738	0.12283	0.182635	0.100852	0.0326348	0.117928	0.109875	0.0835452	0.0953375
1889	1889	0.218054	0.221224	0.099875	0.0435331	0.085845	0.181944	0.0942502	0.192243	0.200159	0.0563079	0.059817	0.0812941	0.101845	0.0847114
1890	1890	0.171483	0.212659	0.0492973	0.0545454	0.07727	0.186471	0.157078	0.219092	0.0440856	0.083871	0.0151362	0.0640647	0.132271	0.0901316
1891	1891	0.175443	0.185442	0.039671	0.0498498	0.096971	0.160204	0.102351	0.232323	0.075447	0.0169884	-0.083926	0.0678856	0.126547	0.0733668
1892	1892	0.200139	0.183137	0.0543197	0.0543958	0.0907497	0.111903	0.0870229	0.224152	0.0915254	0.0151286	-0.0447761	0.0688992	0.109159	0.0951009
1893	1893	0.30165	0.190776	0.0482379	0.0383826	0.094348	0.0709521	0.0880989	0.206194	0.0454065	0.038943	-0.0399999	0.0738822	0.0963217	0.0831252
1894	1894	0.269028	0.196611	0.047278	0.0419126	0.107951	0.0654701	0.0911641	0.256107	0.108093	0.0318471	0.100462	0.0734975	0.0957189	0.0786908
1895	1895	0.304747	0.180174	0.0545368	0.0377358	0.0956938	0.082421	0.0487882	0.230021	0.145462	0.0463447	0.0951396	0.072177	0.10613	0.0677782
1896	1896	0.308382	0.181411	0.0331402	0.0549451	0.102231	0.0866709	0.0494808	0.176229	0.103981	0.0323786	0.0886403	0.0794753	0.107783	0.0762651
1897	1897	0.283477	0.20972	0.0366589	0.0354493	0.079875	0.108522	0.0544735	0.115455	0.134652	0.0549937	0.121622	0.0862768	0.108341	0.0873219
1898	1898	0.267733	0.22619	0.032227	0.0416339	0.0844024	0.123063	0.0753124	0.0720072	0.227027	0.0666159	0.118076	0.0987989	0.119769	0.0927994
1899	1899	0.338816	0.228999	0.0334019	0.0578473	0.0837373	0.140462	0.0962764	0.0622407	0.19703	0.0904548	0.0766929	0.0965598	0.0882949	0.0756501
1900	1900	0.287611	0.282553	0.0284251	0.0504886	0.081447	0.140162	0.101045	0.08132	0.146811	-0.00512237	0.0571429	0.0866902	0.0745882	0.0731297
1901	1901	0.282148	0.269215	0.0306123	0.0557753	0.0834011	0.161244	0.122442	0.0969213	0.206259	-0.0343137	0.0589528	0.0847081	0.0843374	0.0731578
1902	1902	0.296487	0.220599	0.0482037	0.0509642	0.0769864	0.18741	0.0983075	0.119772	0.207668	0.0367937	0.0806905	0.0741874	0.108868	0.0594227
1903	1903	0.295308	0.247931	0.0907598	0.0969766	0.0828595	0.185915	0.098966	0.121212	0.196429	0.0261813	0.0875657	0.0704665	0.121166	0.0648061
1904	1904	0.288849	0.269659	0.0912191	0.100263	0.0824286	0.160312	0.147287	0.110419	0.17598	0.0228625	0.105235	0.0712521	0.115319	0.0917478
1905	1905	0.27673	0.228198	0.101053	0.0767928	0.079698	0.113772	-0.0218447	0.133948	0.156846	0.0198464	0.106331	0.0771001	0.122792	0.086627
1906	1906	0.246339	0.222707	0.108356	0.037627	0.0848677	0.112627	0.0697168	0.137546	0.160714	0.035631	0.0852391	0.0761076	0.133374	0.0944359
1907	1907	0.250395	0.204142	0.0753247	0.0431328	0.084796	0.108092	0.0779727	0.122966	0.196281	-0.00631735	0.0689013	0.0755037	0.100954	0.0906571
1908	1908	0.275486	0.22361	0.071656	0.0384506	0.0831423	0.0968336	0.0813149	0.123068	0.178052	-0.00321543	0.0900099	0.0807927	0.105319	0.0845742
1909	1909	0.238133	0.251152	0.0842742	0.034891	0.0853994	0.0956299	0.079164	0.143805	0.224702	0.00698082	0.106145	0.0812735	0.112646	0.0629547
1910	1910	0.260421	0.21593	0.0850381	0.0602771	0.0924093	0.0934363	0.0960207	0.156404	-0.0552326	-0.0229075	0.0911743	0.0791018	0.127451	0.0681074
1911	1911	0.245913	0.220314	0.0945674	0.0534242	0.0719192	0.104207	0.101782	0.213036	0.0163043	0	0.0403727	0.0767118	0.0974048	0.071874
1912	1912	0.237463	0.206858	0.0830959	0.0548844	0.0866077	0.099393	0.108392	0.202229	0.0800508	0.0642528	0.148515	0.101495	0.103163	0.0961131
1913	1913	0.236986	0.21716	0.0780113	0.0509915	0.0739059	0.113878	0.116242	0.215622	0.136442	-0.00160385	0.119393	0.10792	0.0864007	0.0803227
1914	1914	0.192906	0.210131	0.124543	0.0725319	0.0767599	0.10695	0.0927203	0.166016	0.105983	0.0421017	0.0942149	0.0821198	0.0837671	0.0842411
1915	1915	0.187869	0.234299	0.0513909	0.0548684	0.0880342	0.104061	0.11557	0.19349	-0.0190563	0.0526642	0.029877	0.0694148	0.104762	0.0763224
1916	1916	0.156337	0.203731	0.0515151	0.049864	0.0767599	0.127567	0.0871632	0.205829	0.231693	0.0591222	0.0183674	0.0726738	0.114307	0.0953405
1917	1917	0.237846	0.18873	0.0525258	0.0506621	0.0975716	0.153982	0.0804598	0.203463	0.154989	0.0391937	-0.0175763	0.0771979	0.103068	0.0682788
1918	1918	0.309334	0.195225	0.0341096	0.0669746	0.0925205	0.161074	0.058231	0.203049	0.157605	0.0756205	0.0763052	0.075129	0.119483	0.0686416
1919	1919	0.291994	0.204177	0.0527595	0.0540695	0.0800641	0.0860631	0.062204	0.234345	0.0908343	0.0544986	-0.0646465	0.070975	0.0813278	0.0755621
1920	1920	0.286805	0.19605	0.0587103	0.0426864	0.0904543	0.102213	0.056754	0.264785	0.162747	0.0427155	0.0560579	0.0689787	0.0927409	0.0877059
1921	1921	0.295363	0.229934	0.0397079	0.0348603	0.0851109	0.122343	0.0528814	0.207872	0.195568	0.0513308	0.110492	0.0715244	0.101237	0.0730337
1922	1922	0.314198	0.232998	0.0501393	0.0501039	0.0888662	0.142991	0.0715463	0.109354	0.211334	0.0374511	0.118401	0.0758568	0.100159	0.0778396
1923	1923	0.260628	0.265594	0.0385949	0.0463635	0.0838191	0.145567	0.109396	0.107713	0.147189	0.0229435	0.109071	0.0816287	0.0986425	0.0846664
1924	1924	0.198381	0.261729	0.0337573	0.0584239	0.0788077	0.185239	0.111288	0.106487	0.179701	0.0117077	0.0942473	0.0802161	0.12308	0.075298
1925	1925	0.266458	0.295103	0.0398957	0.0663366	0.0849699	0.186975	0.130068	0.0986082	0.174954	0.0213444	0.11041	0.0776274	0.102665	0.092291
1926	1926	0.333647	0.273309	0.064391	0.0817019	0.0914172	0.19204	0.00413795	0.121724	0.21753	0.031851	0.0755149	0.0771944	0.109734	0.0853978
1927	1927	0.310345	0.210874	0.0833153	0.0811799	0.0828427	0.182359	0.0681363	0.148532	0.179148	0.0217858	0.105651	0.0735931	0.117004	0.0847553
1928	1928	0.34835	0.243639	0.0819866	0.0617152	0.0791874	0.154588	0.0926829	0.155317	0.192331	0.0170492	0.0107527	0.0744896	0.11435	0.0886013
1929	1929	0.300607	0.266975	0.0636969	0.0423776	0.075845	0.114124	0.107327	0.123865	0.139001	0.0191468	0.0757967	0.0762398	0.128962	0.0923655
1930	1930	0.257445	0.213483	0.0629556	0.0392328	0.0928526	0.121171	0.0924499	0.123916	0.209172	0.00384751	0.0960307	0.0745294	0.114286	0.112702
1931	1931	0.237933	0.17207	0.132403	0.0350438	0.0857382	0.10894	0.0995298	0.114754	0.150669	0.0153241	0.0827068	0.0812559	0.109623	0.0798669
1932	1932	0.201342	0.170035	0.127838	0.0536653	0.0893583	0.0898668	0.158416	0.11268	0.154098	0.0232983	0.086785	0.0689115	0.121502	0.0773464
1933	1933	0.251189	0.204066	0.103329	0.0582926	0.0757484	0.0758509	0.120491	0.118673	0.059952	-0.0123566	0.125111	0.0779607	0.117516	0.077474
1934	1934	0.348334	0.224758	0.0897155	0.0493714	0.0795249	0.0788281	0.121951	0.198758	0.0722761	0.0017379	0.107904	0.0836424	0.116309	0.0727943
1935	1935	0.251332	0.224794	0.0691824	0.0585937	0.0779854	0.0944251	0.0980067	0.1587	0.128449	0.0689882	0.0741433	0.0761963	0.0921965	0.0781747
1936	1936	0.249887	0.201052	0.0544778	0.0456786	0.0863787	0.0885647	0.0889213	0.204647	0.115826	0.0331083	0.103499	0.0675433	0.0791613	0.0880754
1937	1937	0.278431	0.19712	0.0639281	0.070534	0.0849292	0.0956457	0.0585349	0.218832	0.116336	0.0377524	0.128881	0.0711146	0.0919313	0.0915411
1938	1938	0.187427	0.182065	0.0511559	0.0744748	0.0807741	0.0977681	0.0744681	0.186813	0.163525	0.0614525	0.0507463	0.0838323	0.107491	0.0924901
1939	1939	0.196893	0.208034	0.0523691	0.0550087	0.0871136	0.10174	0.066823	0.239533	0.23949	0.00697051	0.0608841	0.0830781	0.0989534	0.0743295
1940	1940	0.235142	0.235981	0.0552333	0.0520394	0.0861291	0.119983	0.110157	0.177122	0.176316	0.0227531	-0.030563	0.0694445	0.105604	0.0622438
1941	1941	0.332117	0.266084	0.051051	0.0573466	0.0792119	0.12	0.00267379	0.211883	0.135873	0.00914912	0.0690812	0.0709027	0.0902468	0.0750569
1942	1942	0.333639	0.248898	0.0394299	0.0444886	0.0854353	0.149669	-0.0238095	0.163948	0.112933	-0.0145228	0.0232067	0.0728682	0.122943	0.10449
1943	1943	0.300736	0.245118	0.0471834	0.0767345	0.0821472	0.180636	0.0907631	0.114358	0.16899	0.0338785	0.0382638	0.0772238	0.130185	0.0742469
1944	1944	0.31891	0.255118	0.0426654	0.0856012	0.0861715	0.184281	0.103538	0.0952897	0.180516	0.0318874	0.0438247	0.0793651	0.0776426	0.0701479
1945	1945	0.325714	0.282461	0.0602589	0.0846939	0.0880426	0.199489	0.103304	0.118338	0.175217	0.0252308	0.0909091	0.0678199	0.131637	0.0687831
1946	1946	0.317024	0.256687	0.0558558	0.0638417	0.0876171	0.200199	0.0897807	0.134095	0.189717	0.0148148	0.0730499	0.0689587	0.137908	0.0912686
1947	1947	0.328866	0.239316	0.0540416	0.0341041	0.0817558	0.207023	0.115438	0.125358	0.149425	0.00802442	0.106367	0.0758536	0.111558	0.105582
1948	1948	0.277992	0.240281	0.0487705	0.0251108	0.073922	0.163006	0.105904	0.152092	0.22821	0.0150316	0.079845	0.0747701	0.11811	0.0737652
1949	1949	0.266317	0.1961	0.0601327	0.0192855	0.0955749	0.12309	0.11512	0.169747	0.206257	0.0134607	0.101639	0.0712643	0.119107	0.0625
1950	1950	0.286195	0.211961	0.0628135	0.034678	0.0877193	0.111846	0.122911	0.140149	0.16358	-0.00290335	0.107923	0.0745809	0.121783	0.0601581
1951	1951
1952	1952
1953	1953
1954	1954
1955	1955
1956	1956
1968	1968
1969	1969
1970	1970	0.331944					0.073721

## Sheet: dry
Grande	Matomi	Zamora	Hemes	Blancas	canelo	cordero	Azul	volcan	miramar	Palmito	San Agustin	Peralta	Dulce
0.00295179	0.0339484	0.0702045	0.0239676	0.0570879	0.084229	0.0369448	0.0182841	-0.00542495	-0.010218	-0.0112287	0.0628176	0.0222717	0.0472986
0.0226177	0.0304141	0.054797	0.0347432	0.0475428	0.0717863	0.0365906	0.0400448	0.0571257	0.00733496	-0.00861498	0.0358713	0.0462696	0.0532192
0.00380235	0.0287421	0.0372243	0.0282051	0.0561109	0.0608193	0.0330834	-0.0213294	0.0497449	0.0190664	-0.0171659	0.0290049	0.025722	0.0628528
0.001	0.0479375	0.0470736	0.0171773	0.0515955	0.0503979	0.0467991	0.0260384	0.0503808	0.0315279	-0.0164245	0.0179372	0.032491	0.056418
0.001	0.0346885	0.0456368	0.0160558	0.0557609	0.0433595	0.0363336	0.0228571	0.04919	0.0195281	-0.0118289	0.0248889	0.0213953	0.0606631
0.001	0.023818	0.0669126	0.0196552	0.0538903	0.0467541	0.0394334	0.0273843	-0.0284223	0.0205326	-0.00270189	0.033743	0.0274738	0.0522778
0.001	0.0106565	0.0535516	0.0200554	0.049436	0.049763	0.0411667	0.0109607	-0.0201655	0.0177268	0.00682382	0.0267062	0.0321704	0.04442
0.001	0.0176776	0.0482346	0.012877	0.0562898	0.0408231	0.0432893	0.0113852	-0.0238777	0.0122273	-0.0225378	0.0244115	0.0292793	0.0495884
0.00839165	0.0394238	0.0611553	0.0269467	0.0579687	0.0853875	0.0430127	0.015873	0.000744602	0.0108285	-0.00708346	0.040349	0.0222222	0.0547725
0.0860001	0.0524726	0.0513456	0.0256705	0.0530574	0.0854486	0.042206	0.0121554	0.0163594	0	0.0220344	0.0699476	0.0379919	0.0555985
0.0240307	0.022855	0.0324315	0.0180624	0.0535662	0.0820751	0.0430939	0.0195392	0.033864	-0.014936	0.0161341	0.0349335	0.0699132	0.0522088
0.001	0.0217718	0.0374172	0.0126276	0.0505315	0.0916601	0.0415027	0.0252247	0.0618812	0.0010929	-0.000629723	0.032361	0.0339219	0.0426461
0.001	0.0267728	0.0409976	0.0418748	0.0505303	0.0932763	0.0482992	0.02383	0.0352051	-0.0241988	0.00335264	0.0288066	0.0206713	0.0452428
0.001	0.0262009	0.0471815	0.0187826	0.0488456	0.0893886	0.0375771	0.0298119	0.0361032	0.0100739	-0.0178746	0.0152352	0.0265886	0.0435272
0.001	0.0245353	0.0340681	0.0210402	0.0523519	0.0764058	0.034534	0.0443879	0.0442529	0.00716479	-0.02	0.0160521	0.0272216	0.0480015
0.001	0.027798	0.039749	0.0200717	0.0546371	0.0668699	0.0396651	-0.00786121	0.0291207	0.0151324	-0.0193506	0.0194819	0.0348993	0.0416826
0.001	0.0294639	0.0359218	0.0328841	0.0592511	0.0538667	0.0320579	0.0189791	0.0295989	0.00310495	-0.0139114	0.0408163	0.0628176	0.0488708
0.000326221	0.00665961	0.0470892	0.0447023	0.0625407	0.0395461	0.0399663	0.0162398	0.0320988	0.022651	-0.00746511	0.0451442	0.0358713	0.0428073
0.0205147	0.0179806	0.0343205	0.0373885	0.0538437	0.0451064	0.0517799	0.025472	0.0290093	0.0102564	0.00837629	0.0330923	0.0290049	0.0530049
0.00451669	0.00833916	0.0388485	0.0368813	0.048899	0.0415172	0.034565	0.0141451	0.0368727	0.0269576	-0.0107527	0.0178183	0.0179372	0.0480769
0.001	0.00215986	0.0489865	0.0350269	0.0526487	0.0389275	0.0432379	0.0231284	-0.0300856	0.0114993	0.002414	0.0236427	0.0248889	0.0526316
0.001	0.0323563	0.0481908	0.024083	0.0560561	0.0414541	0.0400299	0.0394222	-0.0311159	0.0117075	0.00272315	0.0183213	0.033743	0.0513907
0.001	0.0182524	0.07035	0.028746	0.0480146	0.0368813	0.0394525	0.030647	-0.0122892	0.0445999	-0.00647549	0.0170845	0.0267062	0.0443548
0.001	0.0174583	0.055814	0.0164877	0.052025	0.0365082	0.0441689	0.036258	-0.0319686	0.0014573	-0.000343525	0.0267661	0.0244115	0.0482204
0.0341311	0.0623462	0.0483686	0.0210921	0.044178	0.0555353	0.0464797	0.0387191	-0.00775582	-0.0111505	-0.0200364	0.0195397	0.040349	0.0492002
0.0181962	0.0528422	0.0424277	0.0231048	0.0520943	0.0567456	0.0586859	0.0216086	0.0359961	0.0112683	-0.015649	0.0262106	0.0699476	0.0583204
0.108098	0.0412772	0.0456884	0.0230569	0.0557979	0.0723372	0.0483185	0.00413355	0.0486034	0.00179718	-0.0183743	0.0321436	0.0349335	0.0530668
0.0830497	0.0497493	0.041354	0.0167126	0.0531386	0.0733769	0.042495	0.0149868	0.0593009	-0.000558036	-0.00425791	0.0554324	0.032361	0.0427546
0.00667103	0.0287661	0.0384233	0.0232999	0.0495963	0.0819988	0.0404844	0.0213749	0.0436578	-0.00486111	-0.0135348	0.0389326	0.0288066	0.0571804
0.001	0.0255044	0.0530598	0.0233091	0.0427598	0.0793958	0.0421955	0.0275015	0.0322052	0.00926641	-0.0123457	0.00712686	0.0507805	0.0424543
0.001	0.0324263	0.0450827	0.0193791	0.0568129	0.0935361	0.0520526	0.0274012	0.0295335	-0.00796813	-0.00691729	0.0107649	0.0246027	0.0471188
0.001	0.0386142	0.0349323	0.0215054	0.0545567	0.0891089	0.0375427	0.0262778	0.0357243	0.0135388	-0.0131744	0.0531266	0.0296425	0.0572626
0.001	0.0293134	0.0426808	0.023506	0.0480845	0.0967742	0.0454719	0.0423955	0.0308123	0.0120579	-0.00835282	0.0213609	0.0192813	0.045208
0.001	0.0165624	0.0325787	0.0211809	0.0579481	0.0869972	0.0416911	0.0254504	0.0401761	0.00832986	-0.0234474	0.0265293	0.0152352	0.0457644
0.001	0.0207736	0.0449438	0.0255781	0.0567183	0.0740672	0.0486043	-0.000578704	0.040659	0.0159255	-0.0167708	0.0181739	0.0160521	0.0431641
0.001	0.0148515	0.0451375	0.0173853	0.0551056	0.0487303	0.0524017	0.036989	0.0449679	0.0237797	-0.00466978	0.0216544	0.0194819	0.0441034
0.001	0.0081763	0.036877	0.0243224	0.0555556	0.0454545	0.0514037	0.0264453	0.0500521	0.0166271	-0.00406123	0.0176935	0.0408163	0.0353796
0.0185957	0.00998569	0.0415443	0.0334996	0.0528854	0.052521	0.0347101	0.019899	0.0355633	0.0142227	-0.00380006	0.0220793	0.0451442	0.0348964
0.0167224	0.0189643	0.0335444	0.0399341	0.0503667	0.0444558	0.0628156	0.0174093	0.046361	-0.00769601	0.00147102	0.0231652	0.0330923	0.0383788
0.040444	0.0143134	0.0343836	0.0385469	0.0522049	0.0399353	0.0501298	0.0227743	0.0531534	0.0101727	0.00208147	0.0256523	0.0178183	0.0481795
0.0277651	0.0391198	0.0446981	0.0301865	0.0498382	0.0340331	0.0441059	0.0345245	-0.03102	0.0422599	-0.0108626	0.0295705	0.0236427	0.0505124
0.001	0.0438985	0.0519802	0.0251159	0.0551233	0.0337687	0.0418695	0.0317037	-0.0252886	0.053112	-0.00633803	0.0182952	0.0183213	0.0552945
0.0224762	0.0415512	0.0454419	0.0261438	0.0479317	0.0362744	0.0433502	0.0258196	-0.0210356	0.0417573	-0.0135218	0.00617161	0.0170845	0.0510733
0.001	0.0427632	0.0541493	0.0314416	0.0503741	0.0372224	0.0433168	0.018246	-0.0162749	-0.023569	0.0013231	0.0328599	0.0267661	0.0502587
0.0244708	0.0642048	0.063082	0.0219735	0.0524951	0.0343465	0.0523175	0.0264357	-0.0109014	0.00573477	-0.00944118	0.0120327	0.0195397	0.0391419
0.0501212	0.0264705	0.0550777	0.0165959	0.0539862	0.0486099	0.0521455	0.0345893	0.0043939	-0.022839	0.00267618	0.0213892	0.0262106	0.0472582
0.0208413	0.0724192	0.0504759	0.0242126	0.0512468	0.0531436	0.0554226	0.0232558	0.057513	-0.00588085	-0.0179234	0.0211316	0.0321436	0.0608253
0.0525917	0.0746269	0.0394829	0.0294334	0.0515933	0.04814	0.058593	0.00744578	0.0770461	0.0197057	-0.00888208	0.0317356	0.0554324	0.0506179
0.0907104	0.0585443	0.0400726	0.0290732	0.0503263	0.0579522	0.0443571	0.0193888	0.0619897	0.0189162	-0.0114445	0.0475988	0.0389326	0.0496678
0.0675581	0.0362009	0.0377389	0.0290082	0.0520667	0.0676832	0.0417867	0.0137446	0.0585274	0.00312057	-0.00826446	0.0445205	0.00712686	0.0439436
0.0580262	0.0326296	0.0367734	0.0257395	0.0498028	0.0677557	0.0455172	0.0094162	0.0353607	-0.0161972	0.00245851	0.0257948	0.0107649	0.0426586
0.001	0.0408087	0.0539462	0.0204863	0.0478313	0.0725283	0.0422195	0.0160584	0.0276639	0.00675676	-0.0105525	0.0235272	0.0531266	0.0498543
0.001	0.0306278	0.0435505	0.0215279	0.0475355	0.0753492	0.0517635	0.0179043	0.0201135	-0.0108268	-0.00125078	0.0230314	0.0347764	0.0542505
0.001	0.0277675	0.0385931	0.0263257	0.0548828	0.0813212	0.0528095	0.0324601	0.0290167	0.0132594	-0.00148765	0.0194286	0.0261371	0.052371
0.001	0.0262391	0.0356648	0.0187845	0.0448902	0.0960302	0.0404791	0.0455979	0.0339077	0.0127867	-0.00935143	0.0379162	0.0260271	0.0524264
0.001	0.0084218	0.0347952	0.0269216	0.0490006	0.0946934	0.0458788	0.0529132	0.0458716	0.0196078	-0.0119949	0.0254498	0.0214536	0.0419648
0.001	0.0128629	0.0328858	0.0232558	0.0512821	0.0910068	0.0424196	0.0498221	0.0426283	0.0135301	-0.00725953	0.0285341	0.0213609	0.0477137
0.001	0.0268505	0.0382888	0.0226601	0.0532946	0.10245	0.0395697	0.0172619	0.0224264	0.0130802	-0.0298982	0.0308914	0.0265293	0.0542169
0.001	0.00651702	0.0484342	0.0283182	0.0524476	0.0802435	0.0430848	0.0369192	0.0342695	0.0186243	0.0028436	0.0298739	0.0181739	0.0425996
0.001	0.0177646	0.0414962	0.0265487	0.0495748	0.0570145	0.047343	0.027061	0.0228013	-0.000542888	0.00558003	0.0245661	0.0216544	0.0389257
0.001	0.0073691	0.0423919	0.015444	0.047619	0.0545455	0.0464593	0.0128397	0.0406711	0.00360825	-0.00783745	0.0210877	0.0176935	0.0343884
0.001	0.0256013	0.0375227	0.0224259	0.0491803	0.0521847	0.0497358	0.0199595	0.0508384	0.00505051	0.0244621	0.01716	0.0220793	0.0427668
0.0166038	0.0390143	0.0377224	0.0163993	0.0501943	0.0414931	0.0435268	0.0223752	0.0637439	0.0120653	-0.00500736	0.022344	0.0231652	0.0300955
0.0610687	0.0445004	0.0312751	0.0344683	0.0462474	0.0356401	0.062048	0.0223368	0.0794309	0.0427387	0.0122638	0.0131023	0.0256523	0.037418
0.0457951	0.0290864	0.0325182	0.0247137	0.0526146	0.0372383	0.0523289	0.0266858	-0.00639053	0.0438095	-0.020177	0.0297291	0.0295705	0.0437168
0.00897665	0.0391062	0.0424689	0.0276416	0.0525454	0.0305718	0.0547667	0.0299332	-0.0142547	0.0362519	-0.0174608	0.0337571	0.0182952	0.0496872
0.001	0.0689801	0.0375306	0.0335118	0.0527893	0.039975	0.0460353	0.027361	-0.0145582	0.0496743	0.00401606	0.0215974	0.00617161	0.050054
0.001	0.0698453	0.0368734	0.0317209	0.0515532	0.0318797	0.0434431	0.0284332	-0.0136528	0.016809	-0.011776	0.0181383	0.0328599	0.0498169
0.001	0.051482	0.068803	0.0268645	0.0469664	0.027555	0.0482146	0.038473	-0.00839454	-0.0225303	0.00852878	0.0349593	0.0120327	0.0523436
0.0153538	0.0465116	0.0567673	0.0260835	0.045211	0.0345749	0.0423809	0.0202899	0.00601974	0.00716253	0.00535362	0.00953449	0.0213892	0.0357208
0.00178761	0.0716028	0.0600088	0.0243062	0.0530664	0.0312887	0.0399411	0.0341433	0.0164695	-0.00656234	0	0.0446594	0.0211316	0.0462963
0.001	0.0269058	0.0463692	0.0191361	0.0556151	0.039309	0.0537065	0.03137	0.0427312	-0.0474906	-0.000593824	0.0261921	0.0317356	0.0467904
0.0376324	0.0544324	0.047219	0.0310049	0.0444243	0.0450161	0.0578057	0.035524	0.0922131	0.0118252	-0.0117793	0.0301192	0.0475988	0.0522995
0.140958	0.084296	0.0413865	0.0376552	0.0443103	0.0337159	0.0740894	0.0344403	0.0777293	0.0498184	-0.00188561	0.0315747	0.0445205	0.0466708
0.211416	0.073904	0.0481928	0.0365024	0.0440101	0.0396854	0.057572	0.0303594	0.0473555	0.0478636	0.00771843	0.0446247	0.0257948	0.0442366
0.162582	0.0376175	0.0528736	0.0202593	0.0509687	0.0542748	0.0418296	0.036875	0.0613194	0.0446735	0.00501327	0.0337761	0.0235272	0.0429263
0.001	0.0335722	0.0418264	0.0281853	0.0533959	0.058309	0.0489378	0.0147107	0.0455158	0.00690131	-0.0102906	0.0454545	0.0230314	0.0516678
0.001	0.0213089	0.050983	0.0230608	0.0496068	0.0555656	0.0454627	0.00162075	0.0414261	-0.00686168	-0.0105263	0.0270578	0.0194286	0.0460295
0.001	0.0285079	0.0429367	0.0251407	0.0478064	0.0618195	0.0359066	0.0163228	0.0173935	-0.0134276	0.016565	0.0306393	0.0379162	0.0624753
0.001	0.0343027	0.0302927	0.0296804	0.0514905	0.0760827	0.0506101	0.0173887	0.043692	0.0236698	0.00257363	0.0304676	0.0111416	0.0582924
0.001	0.0195928	0.0395581	0.0266717	0.0560528	0.0693261	0.0642857	0.01854	0.0412311	0.0243613	-0.012098	0.0303603	0.0274461	0.0428278
0.001	0.0202212	0.0328113	0.0221571	0.0479115	0.0886027	0.0534383	0.0544794	0.0341406	0.0164857	-0.00840841	0.0266186	0.0254498	0.0426667
0.001	0.02271	0.0322971	0.0199604	0.0537878	0.111553	0.0450738	0.0421687	0.025728	0.0190416	0.00498973	0.027004	0.0285341	0.0483646
0.0145752	0.00571857	0.0482023	0.0203782	0.0542484	0.106601	0.0457143	0.0337678	0.0293638	0.0135688	-0.0243294	0.02631	0.0308914	0.0401427
0.001	0.00535575	0.0344828	0.0180346	0.0526488	0.104237	0.0388423	0.00461396	0.0463822	0.0326733	-0.0165713	0.0234099	0.0298739	0.0322957
0.001	0.0166482	0.0485625	0.0207748	0.0543549	0.10973	0.0429964	0.0563702	0.0315171	0.00587889	-0.00393922	0.0241632	0.0245661	0.0584665
0.00953727	0.0147629	0.0393671	0.0186628	0.0516833	0.0799495	0.0489183	0.0317058	0.0540027	0	-0.0162647	0.0207506	0.0210877	0.0512615
0.001	0.0412371	0.0397487	0.0274439	0.0588802	0.0664601	0.0414291	0.0179168	0.0714672	-0.00865007	0.00217628	0.0181655	0.01716	0.0372708
0.00296301	0.0575414	0.0400107	0.029153	0.0605522	0.0670838	0.0330889	0.0244613	0.0577181	-0.00168878	0.00177515	0.0237349	0.022344	0.0372361
0.001	0.0319557	0.0388234	0.0328007	0.0561035	0.0500514	0.0351003	0.0339128	0.0703613	0.0369737	0.0317997	0.016994	0.0131023	0.0371591
0.001	0.0242499	0.0411668	0.0220132	0.0550297	0.029632	0.0472912	0.0408674	0.0681184	0.0556017	-0.013708	0.0234742	0.0297291	0.0404624
0.0128254	0.0598006	0.0413313	0.0276873	0.0467411	0.033644	0.0417681	0.0405587	0.0554017	0.0555088	0.000626174	0.0130036	0.0337571	0.0372744
0.0375346	0.057971	0.0376995	0.0199155	0.0500402	0.0311624	0.0586859	0.0501691	0.0154923	0.0639354	-0.012426	0.034528	0.0215974	0.0399572
0.0202593	0.0685831	0.0360481	0.0269832	0.0481651	0.03723	0.0558606	0.0439592	0.0122156	0.0351267	-0.00674274	0.0269428	0.0181383	0.0473742
0.001	0.0643879	0.038188	0.0287814	0.0526139	0.0281879	0.0468986	0.0411523	-0.00708885	0.0115963	0.00401837	0.0221572	0.0349593	0.0495228
0.001	0.0410729	0.0436459	0.0345114	0.0524529	0.028895	0.044101	0.0368046	0.0216795	0.0113847	-0.0124187	0.0159519	0.00953449	0.0514746
0.001	0.0796383	0.0380451	0.0302034	0.0496333	0.0378219	0.0359203	0.0242234	0.0612583	0.016157	0.00243754	0.0149254	0.0446594	0.0521119
0.001	0.0631845	0.056806	0.0164324	0.0551477	0.0405264	0.0484115	0.0329941	0.0364742	0.0290698	0.00745077	-0.00393443	0.0261921	0.0435734
0.001	0.0445247	0.0481175	0.0264954	0.0554665	0.0292418	0.0518404	0.04044	0.0266636	0.0651204	0.0159341	0.013468	0.0301192	0.0422535
0.001	0.0421304	0.052842	0.0273778	0.0527273	0.0318134	0.0535852	0.019376	0.0573159	-0.0272259	0.0143965	0.0113707	0.0315747	0.045052
0.0108737	0.0614269	0.0460177	0.0315534	0.0523151	0.0353482	0.0539178	0.0114431	0.0545295	-0.0162991	0.03125	0.0305912	0.0446247	0.0504172
0.143975	0.0415451	0.0413053	0.0253139	0.0503361	0.0336479	0.0523405	0.0430019	0.0554493	-0.00312826	0.0122939	0.0183521	0.0337761	0.0460662
0.189474	0.0424972	0.0304354	0.0202125	0.0488756	0.0343834	0.0482897	0.0280266	0.0574163	0.0302414	0.001221	0.0160487	0.0454545	0.0509584
0.0654929	0.078521	0.0534979	0.0216396	0.053641	0.0312052	0.0529069	0.0237406	0.0378882	0.0414552	0.0106446	0.0470761	0.0270578	0.0479692
0.0432346	0.0592161	0.0474841	0.0286162	0.0500229	0.0392157	0.045977	0.0340973	0.056461	0.0341232	0.0159005	0.0265785	0.0306393	0.0552448
0.001	0.0371567	0.041605	0.0323625	0.0587865	0.0391877	0.0428919	0.0448196	0.0448354	0.0106693	0.00831848	0.00418315	0.0304676	0.0507661
0.001	0.00459074	0.0561533	0.041947	0.0517187	0.0536208	0.0456115	0.0163837	0.0260244	-0.0174581	-0.00474777	0.0182482	0.0303603	0.0469243
0.001	0.0100783	0.0368913	0.0352042	0.0507566	0.0549246	0.0504604	0.00716846	0.0274664	-0.00120511	0	0.0194122	0.0266186	0.0465385
0.001	0.018992	0.037459	0.0296712	0.0467747	0.0599888	0.0645486	-0.00929839	0.0332435	0.0152149	-0.00864714	0.0293528	0.0178571	0.0420525
0.001	0.0364403	0.0412595	0.0360996	0.0522603	0.0710612	0.0612245	0.0165431	0.0227061	0.0281527	-0.0117378	0.0401226	0.0483098	0.0415857
0.001	0.032387	0.040783	0.0372578	0.0561404	0.0834159	0.0632002	0.0251225	0.0220565	0.0242534	0.00376921	0.042053	0.0116732	0.035225
0.001	0.00277666	0.0355672	0.0426803	0.04836	0.101362	0.0650354	0.0450508	0.0236456	0.0208641	0.00149656	0.0172589	0.027004	0.0538966
0.001	0.00353635	0.0436756	0.0258575	0.0461397	0.10814	0.0575831	0.0383107	0.034227	0.0114213	-0.00962696	0.0118516	0.02631	0.0478606
0.001	0.0152642	0.0446082	0.0208368	0.0542292	0.118617	0.0488574	0.0447578	0.0394626	0.0265773	0.0129577	0.0220466	0.0234099	0.0486796
0.001	0.011583	0.0457813	0.0211907	0.0577287	0.112627	0.0599114	0.00127146	0.0448593	0.00791269	-0.00551876	0.0272021	0.0241632	0.0336147
0.001	-0.000380612	0.0456681	0.0155732	0.0417872	0.1	0.0482595	0.039786	0.0600402	-0.00442233	-0.00884481	0.0180396	0.0207506	0.0403603
0.001	0.0485436	0.0438717	0.0254634	0.0533552	0.0843461	0.0440425	0.044113	0.0656855	-0.00131822	0.0107124	0.0276267	0.0181655	0.0428291
0.00826992	0.0580876	0.039876	0.0265641	0.0554944	0.0640341	0.0504474	0.0325178	0.0616595	0.00996355	0.0296663	0.016154	0.0237349	0.0486953
0.001	0.0470029	0.0424742	0.0275591	0.0481505	0.0627985	0.0442318	0.0188679	0.0801644	0.0337323	-0.000333667	0.0172872	0.016994	0.0337214
0.0093879	0.0574514	0.0378044	0.0419227	0.0485374	0.0478142	0.0376569	0.0438853	0.0740841	0.0497001	-0.00538827	0.0117283	0.0234742	0.0400453
0.001	0.0527204	0.0347138	0.0403086	0.0491178	0.0381905	0.0346871	0.0436261	0.0564537	0.0529284	-0.00345586	0.0269559	0.0130036	0.0293286
0.001	0.0393049	0.041103	0.028004	0.0509005	0.0303512	0.04329	0.0557892	0.0368165	0.0488269	-0.0149254	0.0268771	0.034528	0.0395147
0.001	0.043894	0.0294761	0.0217654	0.0528389	0.0310752	0.045819	0.101786	-0.0164453	0.0356589	0.0102703	0.0199016	0.0269428	0.0363545
0.001	0.0612605	0.0373134	0.0235942	0.0535395	0.0342228	0.043462	0.0748583	0.0111699	0.0295998	-0.00652482	0.0316258	0.0221572	0.0445658
0.001	0.0539761	0.0371658	0.0301689	0.0466926	0.0353905	0.0386052	0.124809	0.017762	0.015748	0.00595407	0.0125843	0.0159519	0.0484582
0.001	0.0859077	0.0392548	0.0350472	0.0443528	0.042166	0.0414286	0.0711785	0.0625365	0.16599	0.00967239	0.00448814	0.0149254	0.0471185
0.001	0.0618212	0.0450921	0.0361752	0.0508416	0.0327068	0.0461428	0.0540146	0.0393931	0.220209	-0.00635324	0.0164406	-0.00393443	0.0440616
0.001	0.0341502	0.0425324	0.0252065	0.046488	0.0337598	0.0367257	0.0494488	0.0475651	0.0415686	0.0184971	0.0204232	0.013468	0.0534379
0.001	0.0502749	0.0579882	0.0259002	0.0500677	0.0353829	0.0520144	0.0193253	0.0591457	0.0257205	0.0269669	0.0083874	0.0113707	0.0490483
0.001	0.0731895	0.0476053	0.0367879	0.0490847	0.0328422	0.0584139	-0.00192185	0.0407767	0.0892351	0.0134626	0.0226978	0.0305912	0.0475278
0.001	0.0566337	0.0404894	0.0256832	0.049514	0.0306878	0.0557761	0.00095511	0.0347222	0.0617128	0.0161812	0.0287797	0.0183521	0.0444314
0.001	0.0637785	0.0534866	0.0257467	0.0536353	0.038878	0.0518106	-0.00414938	0.0479565	-0.00554324	0.0371991	0.0110444	0.0160487	0.049782
0.001	0.0581655	0.0425277	0.0258765	0.0532738	0.0309498	0.0524502	0.0588547	0.0499435	-0.00635386	0.0307206	0.0261972	0.0470761	0.056129
0.101913	0.0365944	0.0354365	0.028427	0.0536614	0.0280241	0.0530515	0.0527497	0.0391753	-0.00575144	0.0215579	0.0296053	0.0265785	0.0556062
0.176213	0.0348837	0.0364677	0.0310302	0.0599642	0.0404873	0.0426177	0.0330893	0.064375	0.0261755	-0.00148943	0.0555144	0.00418315	0.0557175
0.11213	0.0539063	0.0374126	0.0260835	0.0571861	0.0379433	0.0671222	0.0251518	0.0626198	0.05209	0.00431406	0.0223901	0.0182482	0.0484613
0.108537	0.0529271	0.0350677	0.0358663	0.0550918	0.032932	0.0573687	0.0418455	0.0482077	0.0302453	0.00577034	0.0179797	0.0194122	0.0563277
0.0109589	0.052377	0.0428968	0.0353422	0.0632051	0.0406155	0.0357534	0.0519978	0.0329475	0.00339192	0.0128881	0.0302899	0.0293528	0.053776
0.001	0.0097618	0.0303544	0.0423888	0.0604048	0.0556369	0.0468258	0.0208454	0.0181386	-0.00883753	-0.00648585	0.0296479	0.0401226	0.0494857
0.001	0.0135396	0.040988	0.0495092	0.0532266	0.0590842	0.0504047	0.0474215	0.0237082	0.00471698	0.007842	0.0227464	0.042053	0.0488787
0.001	0.00822125	0.0414894	0.0445633	0.0594735	0.0566661	0.040264	0.0263309	0.029837	0.0125343	0.00605394	0.0290268	0.0175074	0.0363742
0.001	0.0278323	0.0409664	0.0411487	0.0491752	0.064403	0.0457459	0.0349471	0.0176768	0.0188751	0.00225861	0.0484001	0.0189058	0.0342399
0.001	0.0191083	0.0355929	0.0406198	0.0464532	0.0724354	0.0522124	0.0594558	0.0123457	0.0188753	0.0305344	0.0681428	0.0172589	0.0362347
0.001	0.00479615	0.0466359	0.0361287	0.0478402	0.0817829	0.0555795	0.0461243	0.0220977	0.0123865	-0.00359497	0.035284	0.0118516	0.0600153
0.001	0.0198944	0.051963	0.0282258	0.0479329	0.0993824	0.0448796	0.0554685	0.035801	0.0162853	-0.00822079	0.0263444	0.0220466	0.0466933
0.0309959	0.0318725	0.0529665	0.0190602	0.0555215	0.116171	0.0480614	0.0515008	0.0314277	0.0175667	0.0105438	0.0315471	0.0272021	0.0530136
0.00946377	0.0119276	0.0507289	0.0226674	0.0548563	0.118638	0.0493571	0.0154341	0.0587544	0.00545153	0.0102681	0.0407297	0.0180396	0.0411042
0.001	0.0304902	0.0400493	0.0258228	0.051784	0.10647	0.0500102	0.00331345	0.0621567	0.00934579	0.0141007	0.0409938	0.0276267	0.049226
0.001	0.0344551	0.0399309	0.0225718	0.0563582	0.0922276	0.0524563	0.0352409	0.0558053	0.019544	0.0113802	0.0449946	0.016154	0.0491008
0.001	0.0274136	0.0498534	0.0155026	0.0608195	0.074885	0.0387898	0.034266	0.0511094	0.0424385	0.0186214	0.0214518	0.0172872	0.0328088
0.0126409	0.0485362	0.04552	0.0233089	0.0598022	0.0723589	0.0322143	0.0408039	0.0584432	0.0437018	-0.0132409	0.0191312	0.0117283	0.0444265
0.0184941	0.0317726	0.0360017	0.0226601	0.0585473	0.0597357	0.0412462	0.0917403	0.0419437	0.0559058	0.00678666	0.0127431	0.0269559	0.0411692
0.0207348	0.028714	0.0362196	0.0379213	0.0529904	0.0537232	0.0450648	0.0756501	0.0386245	0.0633245	0.00499266	0.0156767	0.0268771	0.0342703
0.00697576	0.0501035	0.036779	0.0266233	0.0559221	0.0380444	0.0302008	0.105918	0.030102	0.050154	-0.00607112	0.0132422	0.0199016	0.0431034
0.001	0.0812352	0.0359396	0.0325639	0.0564334	0.0306356	0.0424684	0.117347	0.0255858	0.0371846	-0.00786959	0.0188216	0.0316258	0.0452732
0.001	0.0621367	0.0405853	0.0279664	0.0499757	0.0357412	0.0515925	0.0477395	-0.0311111	0.0244804	-0.00390625	0.0241112	0.0125843	0.0374475
0.001	0.0581114	0.0433093	0.0234422	0.0512407	0.0330091	0.0500677	0.0695679	-0.0330769	0.0202912	0.000545256	0.0299847	0.00448814	0.0409722
0.001	0.0791956	0.0324049	0.0271036	0.0604591	0.0457033	0.0396058	0.0400729	0.00277971	0.0172253	0.00457666	0.0254447	0.0164406	0.0450516
0.001	0.0875	0.0418742	0.0199362	0.0523256	0.0375209	0.0473517	0.0276796	0.00628515	-0.0105205	-0.00295508	0.0226125	0.0204232	0.0479428
0.001	0.0656236	0.0396654	0.0276535	0.0510083	0.0424242	0.0449025	0.0505405	0.0233451	0.181661	-0.00265096	0.0149073	0.0083874	0.0531763
0.001	0.0867389	0.0401966	0.0303408	0.0485599	0.0309505	0.0487213	0.0554042	0.0384025	0.244518	-0.003544	0.00704486	0.0226978	0.0474825
0.001	0.0648734	0.0428551	0.0308576	0.0550506	0.0312844	0.0537592	0.045258	0.0300661	0.0861482	0.0257598	0.0104447	0.0287797	0.0449827
0.001	0.0747663	0.0371513	0.0388329	0.048518	0.0353357	0.0464933	0.0251572	0.0285407	0.0517779	0.0330861	0.0229994	0.0110444	0.0441261
0.001	0.0548262	0.0479185	0.0311226	0.0507055	0.0378842	0.0446174	0.0205832	0.0331571	0.0494374	0.0426136	0.0215385	0.0261972	0.0445439
0.001	0.0409126	0.0526155	0.0240887	0.0519461	0.0388592	0.0512241	0.0052417	0.0382033	0.00841384	0.0298299	0.0147346	0.0296053	0.0510646
0.001	0.0785773	0.0373974	0.0274841	0.0522638	0.0399003	0.0492243	0.0643216	0.0389426	0.00710594	0.0104338	0.0221756	0.0555144	0.04222
0.001	0.0409771	0.0439883	0.0334541	0.0517292	0.0430108	0.0491241	0.0553328	0.0609786	-0.0327622	0.0201699	0.0410067	0.0223901	0.049923
0.0869722	0.0474006	0.0387571	0.0348048	0.0544228	0.0404149	0.044279	0.0502104	0.0328341	0.00280255	0.0116402	0.0378301	0.0179797	0.0439938
0.193743	0.0303729	0.039604	0.0326422	0.0611818	0.036166	0.0457666	0.0604185	0.0553807	0.0178313	0.0213592	0.0483235	0.0302899	0.0448019
0.0929639	0.0374251	0.0316199	0.0228039	0.0568421	0.0399432	0.0484582	0.0744048	0.0579249	0.0436971	0.0226167	0.044037	0.0296479	0.0512964
0.182226	0.0295858	0.0362488	0.0277279	0.0595526	0.0407029	0.048506	0.0538957	0.0594595	0.0115127	0.0386045	0.0404339	0.0227464	0.0615079
0.0640641	0.0318888	0.0418737	0.0316004	0.0656824	0.045389	0.0340931	0.0380835	0.0424017	-0.00287632	0.0184014	0.0189761	0.0290268	0.0405691
0.001	0.0313531	0.0425072	0.0427639	0.0554276	0.0366792	0.0409172	0.0515528	0.0219746	-0.00618557	0.026215	0.0191294	0.0484001	0.0469538
0.001	0.00918164	0.0473164	0.0517544	0.0599227	0.048228	0.0546637	0.0556916	0.032538	-0.0143702	0.000889944	0.0297421	0.0681428	0.0424435
0.001	0.00279437	0.0481488	0.0395778	0.0553482	0.0600414	0.05487	0.0469843	0.0360333	-0.000211461	0.0129199	0.0269042	0.0201005	0.0368618
0.001	0.0292096	0.0315789	0.0345999	0.0505019	0.0592856	0.0495641	0.0568586	0.0205112	0.00550459	0.00793434	0.0445354	0.0252768	0.0290227
0.001	0.0287706	0.047061	0.0389776	0.0522776	0.0688012	0.0367751	0.0527704	0.00992	0.0123457	0.00138007	0.0326325	0.035284	0.0316
0.001	0.0313439	0.0504931	0.0377734	0.0508267	0.077403	0.0417347	0.0493473	0.0264005	0.00982236	0.0223368	0.0223752	0.0263444	0.0385478
0.001	0.045658	0.0498647	0.0392507	0.0546251	0.09375	0.0522693	0.0561014	0.0320718	0.0174709	-0.0185555	0.0212858	0.0315471	0.0565295
0.0563675	0.0450216	0.0430023	0.0525869	0.052951	0.103462	0.0434611	0.0511182	0.0340945	0.00990545	-0.00785193	0.0178492	0.0407297	0.0581096
0.106305	-0.00307701	0.0334012	0.0512295	0.0548628	0.111026	0.0487708	0.0320102	0.057775	0.0125682	0.00465116	0.0142695	0.0409938	0.0433457
0.00316963	0.018022	0.0312567	0.0380952	0.0596779	0.104558	0.045957	0.00226171	0.0595447	0.00866463	0.0158547	0.0132435	0.0449946	0.0525832
0.001	0.0255144	0.0273973	0.0387681	0.0560051	0.096337	0.0404197	0.00969619	0.0315577	0.0217764	0.0148741	0.0481851	0.0214518	0.0433496
0.001	0.0266189	0.0277247	0.0331521	0.0586201	0.0762431	0.0413489	0.0469245	0.0375297	0.0352304	0.0256101	0.0626792	0.0191312	0.0525278
0.001	0.0823044	0.0400127	0.0197614	0.0544615	0.0656006	0.0421514	0.0676507	0.0471676	0.0361241	0.00784827	0.0389344	0.0127431	0.0454921
0.001	0.0996503	0.0405124	0.0160976	0.0565688	0.0614841	0.0380242	0.0831311	0.0344315	0.0570956	0.000611621	0.0417564	0.0156767	0.0412614
0.0142662	0.0480507	0.0355661	0.0240194	0.0513725	0.0509283	0.0401825	0.0843517	0.0354251	0.0753026	0.00498096	0.0246264	0.0132422	0.0434623
0.00700193	0.0943756	0.0323048	0.0258303	0.0472839	0.0485994	0.0335404	0.0663812	0.0231621	0.0429363	0	0.0161587	0.0188216	0.0454079
0.010324	0.113658	0.0328473	0.019942	0.0503125	0.0379382	0.0356261	0.0285714	0.0222106	0.035755	0.00861079	0.00569106	0.0241112	0.0348028
0.010682	0.0828821	0.0403941	0.0228623	0.0516996	0.0308235	0.042982	-0.00738363	0.0283151	0.0313964	0.0114943	0.0163603	0.0299847	0.0466427
0.001	0.0477732	0.0346084	0.032034	0.05875	0.0301949	0.0482086	0.000903887	-0.00457516	0.0171184	0.0141706	0.0192989	0.0254447	0.0385906
0.001	0.0739975	0.0408681	0.0219124	0.0602258	0.0389309	0.048486	0.00299973	-0.00272665	0.0100585	0.00613497	0.0219691	0.0226125	0.043682
0.013237	0.101547	0.0431996	0.0334967	0.0568019	0.0376185	0.0424336	-0.00311377	-0.00504323	0.01521	0.0164575	0.036785	0.0149073	0.0323703
0.001	0.0707547	0.0295858	0.0387057	0.0519543	0.0380062	0.0376788	0.0175186	-0.00681737	0.0441989	0.0203966	0.0397593	0.00704486	0.04801
0.001	0.047696	0.0444568	0.017694	0.0503548	0.0313426	0.0513073	0.00386627	0.0222517	0.0428571	0.0116444	0.0360773	0.0104447	0.0473458
0.001	0.0607529	0.049078	0.01881	0.048925	0.0273259	0.0601371	0.0184517	0.0250941	0.0128635	-0.00450197	0.00884317	0.0229994	0.05832
0.001	0.0943397	0.0520833	0.0250451	0.0534979	0.02632	0.0518363	0.0235272	0.0150445	0.0893687	0.00117786	0.0226195	0.0215385	0.0494255
0.001	0.0537975	0.0467977	0.0326851	0.0555651	0.0292931	0.0443594	0.0350707	0.020337	0.101783	0.00558065	0.0180072	0.0147346	0.0489639
0.00761899	0.0550038	0.0325994	0.0336591	0.0585719	0.0268362	0.046085	0.0390658	0.0417842	0.117035	0.0182016	0.0244066	0.0221756	0.0370092
0.001	0.0612402	0.0542159	0.0354549	0.0554954	0.034792	0.0474383	0.00815451	0.0540863	0.140796	0.0272243	0.0264515	0.0410067	0.048234
0.001	0.0601626	0.0456193	0.0286807	0.0550007	0.0391382	0.0539596	0.0736024	0.0691114	0.0220484	0.0461186	0.0515807	0.0378301	0.0516166
0.001	0.0765411	0.0448349	0.0320935	0.0582701	0.0358225	0.0460635	0.0538424	0.05549	-0.0166909	0.0301324	0.0146062	0.0483235	0.0472257
0.001	0.0574989	0.0369058	0.027921	0.0595452	0.0378667	0.0587789	0.0618102	0.0639305	0.00477707	0.0138427	0.0352159	0.044037	0.0481868
0.0669941	0.0570758	0.0386722	0.029661	0.0561899	0.0405018	0.0440844	0.0549517	0.0501633	-0.0401116	0.00658415	0.0135424	0.0404339	0.0404516
0.169174	0.0390299	0.0455855	0.0362	0.0563961	0.0431065	0.0519481	0.0574429	0.0384261	0.00787402	0.016851	0.0349735	0.0189761	0.0552316
0.10229	0.0477336	0.0374532	0.0376002	0.0589662	0.045503	0.0358814	0.0498783	0.0417059	0.0798645	0.021405	0.0219309	0.0191294	0.051822
0.30107	0.0530035	0.0316883	0.0346084	0.0626711	0.0464654	0.0480848	0.0520402	0.0465261	0.074184	0.034311	0.0193732	0.0297421	0.0605232
0.0367133	0.0988713	0.0404313	0.0328812	0.0557318	0.0374753	0.0543637	0.0483017	0.0340804	0.00247525	0.0462574	0.0249848	0.0269042	0.0332046
0.00926645	0.0469624	0.0369592	0.0338123	0.0573427	0.0322355	0.0404412	0.0697115	0.0255786	-0.0149355	0.0250758	0.0315375	0.0445354	0.0467327
0.001	-0.00715792	0.0513251	0.0381944	0.0603558	0.0514102	0.0348279	0.0668294	0.0263566	-0.0246777	0.0212034	0.0149102	0.0326325	0.0481023
0.001	0.0337275	0.0430606	0.0380577	0.0521961	0.0508413	0.0718923	0.0515954	0.0283048	-0.00520355	0.0264395	0.0304587	0.0380587	0.0364146
0.001	0.070436	0.0354074	0.0436103	0.0525184	0.0487315	0.0667957	0.0315103	0.0302652	0.00426296	-0.000851547	0.0244672	0.0210526	0.0336452
0.001	0.0731707	0.0541462	0.0425532	0.0578614	0.0574456	0.0507158	0.0445528	0.0225755	0.00277363	-0.00738714	0.0488323	0.0223752	0.0447522
0.001	0.0476592	0.0510949	0.0388073	0.0527111	0.0722419	0.0551773	0.035725	0.0292475	0.0143043	0.00163399	0.0220669	0.0212858	0.0428047
0.0132777	0.0471742	0.0476923	0.0307076	0.0483238	0.0630734	0.0472846	0.0421595	0.0364109	0.00338983	0.00083682	0.0351563	0.0178492	0.0378299
0.115291	0.0533579	0.0409021	0.0311052	0.057656	0.0893063	0.0530757	0.0261253	0.0409281	0.0142462	-0.00705755	0.0321739	0.0142695	0.0549575
0.0802435	0.0945736	0.0413189	0.0592196	0.0564805	0.096404	0.0448718	0.0348322	0.0521961	0.014078	0.00211977	0.0229581	0.0132435	0.0505963
0.0247524	0.0844091	0.0311814	0.0637245	0.0591549	0.100057	0.043322	0.0263743	0.0537054	0.0129048	0.0122406	0.0233184	0.0481851	0.0585895
0.001	0.0757991	0.0331311	0.0715017	0.0531743	0.0873271	0.0469519	-0.00883219	0.0435018	0.011988	0.0180305	0.026083	0.0626792	0.0493933
0.001	0.117932	0.0331288	0.0633748	0.0513471	0.0794251	0.0383447	0.0220322	0.0385356	0.0158371	0.0173443	0.0312023	0.0389344	0.0479061
0.001	0.108211	0.0342186	0.0325698	0.0470461	0.0749198	0.0441265	0.0472613	0.0385531	0.0201729	0.0166013	0.0138043	0.0417564	0.0412544
0.001	0.15698	0.0350735	0.0255875	0.0490731	0.0739227	0.0561842	0.0466667	0.0381247	0.0400175	0	0.0219561	0.0246264	0.0444965
0.001	0.114241	0.0321767	0.0336488	0.054358	0.0656575	0.047619	0.0685013	0.0412426	0.0493641	-0.00332226	0.0510715	0.0161587	0.0452567
0.001	0.126365	0.0389105	0.0301489	0.0519542	0.0663347	0.0390198	0.0231267	0.0325892	0.0770249	0.00875868	0.0288126	0.00569106	0.0453747
0.00715207	0.0464208	0.0352941	0.0344828	0.0474528	0.0490903	0.0417124	0.000325627	0.0326005	0.0524628	0.00338149	0.0187769	0.0163603	0.046236
0.00615765	0.0428517	0.0387734	0.0239011	0.0552166	0.0269756	0.0424528	0.019957	0.0449655	0.0410327	-0.0011383	0.0187907	0.0192989	0.0356517
0.0199392	0.0711365	0.0436694	0.0181455	0.0466853	0.0258402	0.0381522	0.00697855	0.0341176	0.0401139	-0.00222841	0.011706	0.0219691	0.0460314
0.03367	0.0875745	0.0428339	0.0190127	0.0494403	0.0354073	0.0392857	0.00755776	-0.0016	0.00621415	0.0115007	0.00580416	0.036785	0.0479383
0.001	0.0901034	0.0398593	0.0323198	0.0482631	0.0339725	0.0429585	-0.0056696	0.0158336	0.0139976	0.00839396	0.0173591	0.0397593	0.0344937
0.001	0.0889513	0.0470622	0.0276664	0.0439317	0.0341175	0.0412535	0.00799087	0.0107459	0.0190903	0.0302339	0.0351816	0.0360773	0.044233
0.0362737	0.0772607	0.0422614	0.0273581	0.0579457	0.0324409	0.0313743	0.00390843	0.00504202	0.0249884	0.0128548	0.0206379	0.00884317	0.0394415
0.00130604	0.118587	0.0380818	0.0276525	0.0588993	0.0302543	0.0411622	0.00942525	0.0178978	0.0190094	-0.00809611	0.032545	0.0226195	0.0499735
0.001	0.13619	0.049582	0.0196375	0.0618452	0.038567	0.0406952	0.0253858	0.0292729	0.0493622	0.00834532	0.00836739	0.0180072	0.0511135
0.001	0.163837	0.0444477	0.0208212	0.0671106	0.0375504	0.0446183	0.0517518	0.009071	0.0658584	0.00493182	0.0179321	0.0244066	0.0574713
0.001	0.0570662	0.0468705	0.0291498	0.0624204	0.0217159	0.0444097	0.0829437	0.0118394	-0.00117371	0.019443	0.0189169	0.0264515	0.0441886
0.001	0.056277	0.0513192	0.0304916	0.0715843	0.0296192	0.0469297	0.0126333	0.0367045	0.0309826	0.0139935	0.0234828	0.0515807	0.0561468
0.001	0.051213	0.0400596	0.0296736	0.063514	0.0338333	0.0398773	-0.00752361	0.0555834	0.0981013	0.0256706	0.0217163	0.0146062	0.0408163
0.001	0.0546623	0.0743343	0.0217346	0.0574038	0.0439481	0.0482047	0.0493855	0.0630408	0.0473395	0.0213285	0.0347155	0.0352159	0.0390045
0.00497515	0.0594185	0.0510298	0.0268817	0.0572701	0.0397399	0.0466418	0.0484101	0.0628601	-0.0177988	0.0288344	0.0162653	0.0135424	0.0353602
0.001	0.0538872	0.0427553	0.0247335	0.0554779	0.0362918	0.0529023	0.0621891	0.0455635	-0.0202855	0.0221697	0.052063	0.0349735	0.0540692
0.001	0.0372229	0.0318549	0.0321474	0.0565809	0.0374599	0.0511731	0.074696	0.0445216	-0.0206561	0.0127981	0.0297754	0.0219309	0.0495014
0.0366386	0.0535048	0.0446414	0.0287162	0.0513095	0.042496	0.0358255	0.0489113	0.0471785	-0.0344353	0.00426015	0.0574091	0.0193732	0.0513327
0.117923	0.0367047	0.0417385	0.0281633	0.0578106	0.0390625	0.040496	0.0694992	0.0415236	0.00375738	0.0139721	0.0217687	0.0249848	0.0400552
0.117005	0.036379	0.0407501	0.030472	0.0589348	0.0407691	0.0476731	0.0703125	0.0342698	0.0477081	0.0131395	0.0424173	0.0315375	0.044063
0.147392	0.0690385	0.0375887	0.0362887	0.0591549	0.0429779	0.0492833	0.0480401	0.0210787	0.0735795	0.0161423	0.0340431	0.0149102	0.0578988
0.001	0.104195	0.0448718	0.0414608	0.0613874	0.0406914	0.0490626	0.0714938	0.0300061	-0.000597372	0.0247525	0.0390423	0.0304587	0.0404738
0.001	0.0284713	0.0282768	0.0408472	0.0561902	0.0358225	0.0557505	0.0700401	0.01875	-0.0301003	0.0120022	0.0263548	0.0244672	0.0466548
0.001	0.0262365	0.0480955	0.0413118	0.055469	0.0479586	0.0584206	0.055199	0.0359356	-0.022824	0.0245788	0.0297611	0.0488323	0.0453333
0.001	0.0262927	0.044044	0.0413259	0.0524095	0.0455851	0.0396957	0.0585015	0.0349428	0.00864362	0.0504937	0.0313655	0.0430556	0.0279919
0.001	0.0134048	0.0467626	0.0411317	0.0473778	0.037642	0.046384	0.0497769	0.0250965	-0.0131962	0.0187308	0.0299779	0.0498883	0.0327537
0.001	0.00972672	0.0501393	0.0394737	0.0502407	0.0563149	0.0512315	0.0389692	0.0277144	0.0191827	0.00575185	0.0358138	0.0220669	0.0392433
0.001	0.047191	0.0523303	0.0381679	0.0528736	0.0722961	0.0556102	0.0323974	0.0406005	0.0151197	0.00972447	0.0501553	0.0351563	0.0323482
0.0513113	0.0485343	0.045283	0.0317673	0.0487062	0.0537392	0.0638201	0.0366197	0.0644719	0.0141129	0.000276167	0.0300973	0.0321739	0.0497586
0.197557	0.0704365	0.0443491	0.0243048	0.0518039	0.0585204	0.0553422	0.0305958	0.0556091	0.0167645	-0.00220022	0.0311249	0.0229581	0.0517974
0.0904964	0.16722	0.0413028	0.0361399	0.0529449	0.0775602	0.0615758	0.0532393	0.0441813	0.026298	0.0163577	0.0282638	0.0233184	0.0445265
0.001	0.163205	0.0284302	0.0343791	0.0548866	0.0884956	0.0496215	0.0142337	0.0273752	0.0115105	0.0197044	0.0185309	0.026083	0.0504155
0.0255762	0.168373	0.0311871	0.0622522	0.0601575	0.0813566	0.0471545	0.0255885	0.0205802	0.00825666	0.0295759	0.0322154	0.0312023	0.0483516
0.001	0.148818	0.0253911	0.0694417	0.059183	0.059707	0.0490809	0.0116359	0.0255553	0.00670841	0.00793418	0.0269292	0.0138043	0.0569427
0.001	0.0780669	0.0251441	0.0613546	0.0545683	0.0759277	0.045	0.0236629	0.0300733	0.0265336	0.00683101	0.0248668	0.0219561	0.0402695
0.001	0.071378	0.0356271	0.0342715	0.0523675	0.0710559	0.0456	0.0429104	0.0383893	0.0396669	0.00511278	0.0314249	0.0510715	0.0470678
0.001	0.0636832	0.0366943	0.0242826	0.0452818	0.0588235	0.0483431	0.0339409	0.0253943	0.0520179	-0.00298686	0.024602	0.0288126	0.0545777
0.001	0.112299	0.0373536	0.0221982	0.049029	0.0590135	0.039497	-0.000673401	0.0299891	0.0727763	0.00532544	0.036772	0.0187769	0.0411081
0.001	0.0554362	0.0346118	0.0298665	0.0498047	0.0527961	0.0426421	0.0346649	0.0337278	0.0519567	0.00639269	0.0412643	0.0187907	0.0496346
0.00315254	0.0628352	0.033282	0.0330649	0.0478809	0.0328758	0.0363215	0.0437673	0.0266953	0.03841	-0.00895522	0.0274641	0.011706	0.0406818
0.001	0.106973	0.0341493	0.0294995	0.0479397	0.0301023	0.0291342	0.0367299	0.0367713	0.027896	-0.00992481	0.0138308	0.00580416	0.043445
0.001	0.145989	0.0382611	0.019237	0.0489829	0.0315443	0.0334492	0.00370305	0.0214147	0.00703713	-0.00490337	-0.00651702	0.0173591	0.0338566
0.00840339	0.104243	0.0462347	0.0226709	0.046796	0.0337942	0.0394366	0.00652647	0.0121873	0.0185141	-0.00223714	0.0148636	0.0351816	0.0419785
0.00863556	0.0700388	0.0522946	0.0311284	0.0486089	0.0329567	0.0325769	0.00381756	0.00786411	0.0138623	0.0136073	0.0250467	0.0206379	0.0374981
0.001	0.178992	0.0437393	0.0273245	0.0477118	0.0321446	0.0367829	0.0507637	0.0128165	0.0154525	0.0133592	0.0274725	0.032545	0.0442966
0.001	0.265046	0.0444509	0.0271365	0.0437721	0.0350482	0.0412886	0.043519	0.0152411	0.0151233	0.0175012	0.0066778	0.00836739	0.0452718
0.001	0.137575	0.0450969	0.0289825	0.0430531	0.0365034	0.0315738	0.000875274	0.0217597	0.014333	0.0109157	0.0127691	0.0179321	0.0449656
0.001	0.131745	0.0411687	0.0263263	0.0453064	0.02591	0.0278712	0.00902035	0.0228648	0.0364416	0.0178147	0.0289041	0.0189169	0.0479812
0.001	0.0745763	0.0403132	0.0251315	0.0413936	0.0292041	0.0166282	0.0453081	0.0165202	0.0389682	0.0103573	0.0375791	0.0234828	0.0460526
0.001	0.0501992	0.039261	0.0210773	0.0564007	0.0323379	0.0433188	0.0402629	0.00263505	0.011127	0.0239324	0.0186047	0.0217163	0.0472848
0.001	0.0589614	0.0362694	0.0271165	0.067451	0.0256681	0.0388128	0.0426267	0.0157068	0.023569	0.0301775	0.0323844	0.0347155	0.057259
0.001	0.0423092	0.045067	0.0244108	0.0675991	0.0349552	0.0359268	0.0493781	0.040504	-0.0224933	0.0296201	0.0248455	0.0162653	0.0430029
0.001	0.0326798	0.0659898	0.0120724	0.0688488	0.0368421	0.0487059	0.0631011	0.0580371	-0.0246067	0.0286678	0.0457536	0.052063	0.0402028
0.001	0.0271084	0.0508255	0.0149133	0.057463	0.0409969	0.0542694	0.0562975	0.0600707	-0.0488259	0.0226428	0.0117479	0.0297754	0.0358654
0.001	0.0472409	0.0430023	0.0219462	0.0482152	0.0371707	0.0620564	0.0622809	0.0382921	-0.0257593	0.0266089	0.0335976	0.0574091	0.0462661
0.001	0.104247	0.0375459	0.0297406	0.055128	0.0479826	0.0618038	0.070971	0.0410959	-0.0363257	0.00851689	0.0146734	0.0217687	0.042318
0.001	0.0839759	0.0415043	0.0302781	0.0592922	0.0324074	0.0568345	0.0747143	0.0364322	-0.0264664	0.0211203	0.0285805	0.0424173	0.0468668
0.0898764	0.0561798	0.0382456	0.0267526	0.0552764	0.0332262	0.039132	0.0597534	0.0454968	-0.0100059	0.0228233	0.0190355	0.0340431	0.0249494
0.103629	0.0165505	0.0398377	0.0251707	0.0497099	0.0364256	0.053886	0.0725685	0.0422108	0.011893	0.0258427	0.0160781	0.0390423	0.0582766
0.00327865	0.0479482	0.0412132	0.0337032	0.0513699	0.03867	0.0469897	0.0643029	0.0304726	0.042558	0.0252667	0.0149302	0.0263548	0.0436817
0.001	0.0778392	0.0367836	0.0357666	0.05564	0.0325681	0.046683	0.0581851	0.0409357	0	0.0235262	0.0131092	0.0297611	0.0503798
0.001	0.0901526	0.0391399	0.0366708	0.0536201	0.03822	0.0600522	0.0732636	0.0149626	-0.0127634	0.0263231	0.0155635	0.0313655	0.0529259
0.001	0.0538002	0.0493639	0.0432964	0.0526316	0.0398135	0.0535211	0.0594092	0.0267913	-0.023005	0.026195	0.0133375	0.0299779	0.0382804
0.001	0.077057	0.045159	0.0297964	0.049765	0.0444685	0.048298	0.0668885	0.0261747	-0.0129325	0.0256696	0.0401118	0.0358138	0.0388606
0.001	0.0537109	0.0461538	0.0333262	0.045186	0.0495413	0.0273282	0.0479781	0.0339961	-0.0276215	0.0437033	0.0314392	0.0244898	0.0331424
0.001	0.0587613	0.0516754	0.0358862	0.0460892	0.0408236	0.041841	0.0450763	0.0449511	0.00881152	0.00797799	0.0192929	0.0501553	0.0299738
0.001	0.0657009	0.0578842	0.0368398	0.0483033	0.0510631	0.0398345	0.036806	0.0330665	0.0101618	0.0159351	0.0375663	0.0300973	0.0289798
0.0928652	0.0419047	0.0467778	0.0303837	0.0500156	0.0642586	0.0491555	0.0334405	0.060371	0.0290179	0.0179978	0.161775	0.0311249	0.0399408
0.149128	0.0489296	0.0432211	0.0313882	0.0560777	0.0544465	0.0485252	0.0355466	0.0458488	0.0174442	0.0136132	0.0406678	0.0282638	0.0272257
0.013567	0.109692	0.0191214	0.0347341	0.0525168	0.0462798	0.0728631	0.0416951	0.0228964	0.0223282	0.00593723	0.0418895	0.0185309	0.0435798
0.00268097	0.196871	0.0307986	0.0438884	0.0492519	0.0628895	0.0431267	0.0619351	0.0173103	0.0150191	0.0250976	0.0222635	0.0322154	0.0438389
0.0382685	0.164313	0.0189855	0.0397772	0.0470424	0.0786737	0.062333	0.0446159	0.00971842	0.0128889	0.0372236	0.0212381	0.0269292	0.0468278
0.0302067	0.134615	0.0340725	0.0331126	0.0508047	0.0695352	0.0411281	0.0511596	0.0227165	0.00984706	0.0414854	0.0308466	0.0248668	0.0446412
0.001	0.116865	0.0252056	0.0431711	0.0518732	0.0673946	0.0453497	0.0387051	0.0238994	0.0249746	0.00849195	0.0228597	0.0314249	0.0568537
0.001	0.103448	0.0332063	0.0473282	0.043152	0.0675808	0.0427581	0.0170198	0.0266264	0.0417291	0.00350263	0.0162067	0.024602	0.0415584
0.001	0.0919614	0.0354214	0.0446163	0.0392371	0.0658271	0.0379219	0.0138842	0.025036	0.0524429	-0.00406977	0.0190293	0.036772	0.043014
0.001	0.0926773	0.0341034	0.0377907	0.0473196	0.0603647	0.0444612	0.0135987	0.0260919	0.0417702	0.00920069	0.0202802	0.0412643	0.0458302
0.001	0.063508	0.0442308	0.0265014	0.0492634	0.0546559	0.0432346	0.0128848	0.0157973	0.0451193	0.00748848	0.0233307	0.0274641	0.0397719
0.001	0.0277662	0.0430607	0.0209298	0.0516883	0.0544647	0.0259683	0.0285537	0.0299878	0.0517428	-0.000591716	0.0229533	0.0138308	0.0504241
0.001	0.0687418	0.034613	0.0305581	0.0445736	0.0394716	0.0322721	0.0578652	0.0338778	0.0317722	0.00152022	0.0138321	-0.00651702	0.0391963
0.001	0.240977	0.0323798	0.0301098	0.0383557	0.0267234	0.0279543	0.064227	0.03657	0.0192498	-0.000313381	0.0321862	0.0148636	0.0473077
0.001	0.261131	0.0287401	0.0341955	0.0496196	0.0343558	0.0385297	0.0325787	0.00171409	0.0141671	0.00120192	0.0168809	0.0250467	0.0508732
0.001	0.234043	0.0386622	0.0312288	0.0467984	0.0372086	0.0206561	0.018589	0.00889363	0.0146811	0.00635471	0.032	0.0274725	0.0419447
0.010263	0.222289	0.0430832	0.0265012	0.0535077	0.0340244	0.0405792	0.0452716	0.00939784	0.0165622	0.0156895	0.00524059	0.0066778	0.0414079
0.00661279	0.263832	0.0388617	0.0258054	0.0482969	0.0337512	0.0570767	0.0605834	0.00891383	0.00919	0.0160377	0.0230049	0.0127691	0.0404168
0.001	0.162119	0.0391127	0.0196213	0.0498554	0.0314161	0.0536669	0.074046	0.015098	0.0213144	0.0245729	0.00388711	0.0289041	0.0362069
0.001	0.112895	0.0438738	0.0204747	0.0543404	0.0331738	0.0452358	0.0716962	0.0301168	0.0139879	-0.000551268	0.00375427	0.0375791	0.0433576
0.001	0.143409	0.0383189	0.0307935	0.0591295	0.0335142	0.0360401	0.0688525	0.0365186	0.0267692	0.015274	0.0185936	0.0186047	0.0427204
0.001	0.105215	0.0330286	0.0351612	0.0482385	0.038551	0.0352603	0.0458073	0.0418919	0.0157628	0.000769428	0.0297718	0.0323844	0.0413047
0.001	0.0788825	0.0384957	0.0233692	0.0563924	0.0474248	0.040991	0.0243427	0.0218642	0.0703503	0.0331835	0.0289933	0.0248455	0.050267
0.001	0.0557834	0.0432143	0.03205	0.0552621	0.0331551	0.0273941	0.0352317	-0.0026445	0.0939345	0.0235123	0.0146736	0.0457536	0.0576852
0.001	0.0850708	0.0289067	0.0378469	0.0498243	0.0284394	0.0370535	0.0326141	0.00568586	0.0576863	0.0206452	0.014142	0.0117479	0.0377159
0.001	0.0531158	0.0482549	0.0170109	0.0672665	0.0285815	0.0537283	0.0296372	0.0344108	-0.0374163	0.0448674	0.0288011	0.0335976	0.0425225
0.001	0.0261358	0.0479859	0.00893898	0.0518428	0.0351989	0.0632613	0.0605017	0.0512295	-0.00667223	0.0266393	0.0210092	0.0146734	0.0326919
0.001	0.0344827	0.0529716	0.0184927	0.0461424	0.0333157	0.057351	0.0562622	0.0456574	-0.0591716	0.027027	0.0380341	0.0285805	0.0407393
0.001	0.0707964	0.0502736	0.0179907	0.055149	0.0310271	0.0493146	0.0590853	0.0581274	-0.0361746	0.0305828	0.0111985	0.0190355	0.0419299
0.001	0.10421	0.0530612	0.020829	0.060425	0.0364156	0.0526316	0.0660123	0.0488948	-0.0558751	0.0260623	0.0337263	0.0160781	0.0443623
0.001	0.0697221	0.0437699	0.0310711	0.0578165	0.0430361	0.0550725	0.062886	0.0276423	-0.0194278	0.0252005	0.0364792	0.0149302	0.0360101
0.0472728	0.0320879	0.0470288	0.0338068	0.0551004	0.0354585	0.0490449	0.055168	0.0398987	-0.0080429	0.0304372	0.0447174	0.0131092	0.0502268
0.055	0.0438982	0.0384832	0.0328907	0.0546318	0.0327519	0.0674324	0.0735115	0.0383189	0.00699301	0.0419781	0.0510052	0.0155635	0.0387218
0.001	0.0768566	0.0429619	0.0316008	0.053229	0.0358377	0.0447988	0.0681004	0.0427191	0.0600594	0.0390492	0.0348939	0.0133375	0.0477337
0.001	0.078544	0.0479629	0.0271484	0.053301	0.0426627	0.0509804	0.0578662	0.0356589	0.0190375	0.043627	0.0321402	0.0401118	0.0395662
0.001	0.110555	0.0491209	0.0243902	0.0526481	0.0312891	0.0421053	0.062401	0.0160891	-0.00478469	0.0421738	0.0269343	0.0314392	0.0311039
0.001	0.072701	0.043222	0.0268718	0.0540067	0.0347284	0.0535902	0.0678972	0.0249392	-0.0299047	0.0309859	0.0332717	0.0192929	0.0426004
0.001	0.0644706	0.0603881	0.0310302	0.0458101	0.0412039	0.0271289	0.0656448	0.0308397	-0.00461741	0.027836	0.0369666	0.0375663	0.0338846
0.001	0.0662557	0.0516704	0.0303669	0.0548632	0.0377527	0.0351064	0.0464955	0.029582	-0.0389287	0.0208974	0.0401364	0.0253616	0.0350118
0.001	0.0212072	0.047197	0.0308445	0.0384923	0.0467698	0.0339168	0.0412518	0.043222	-0.00762361	0.00744559	0.0538765	0.058472	0.0329627
0.0160427	0.0556422	0.047421	0.0329577	0.0416015	0.0478955	0.028524	0.0256735	0.0280992	0	0.0122022	0.031764	0.161775	0.0292118
0.0694295	0.000952362	0.0427386	0.0330106	0.0474856	0.0493918	0.038671	0.0270799	0.0410959	0.0164866	0.00597729	0.0544643	0.0406678	0.0394072
0.185773	0.0505676	0.0282117	0.027342	0.0585755	0.0501573	0.0393782	0.0315425	0.0308087	0.0154424	0.0158822	0.118314	0.0418895	0.0384483
0.107627	0.129169	0.0233402	0.027087	0.0480549	0.0355702	0.0504948	0.0466966	0.0151332	0.0200474	0.0205874	0.0206186	0.0222635	0.0447656
0.00894778	0.133717	0.0304237	0.0363712	0.0494926	0.0395541	0.0629866	0.0711841	0.0014339	0.0243796	0.00759361	0.0456485	0.0212381	0.0454545
0.00635325	0.177955	0.0227743	0.0416497	0.0579078	0.0489251	0.0350799	0.0647677	-0.00415628	0.0306431	0.0243644	0.0192095	0.0308466	0.0513061
0.0357363	0.135873	0.0127212	0.0434607	0.0556503	0.0641248	0.0361446	0.0429406	0.00534188	0.0217729	0.0376616	0.0301635	0.0228597	0.0468278
0.001	0.0673823	0.0175151	0.0413256	0.0439195	0.0735767	0.0330208	0.0349895	0.0160157	0.0441149	0.0333142	0.0264268	0.0162067	0.0494297
0.001	0.0789336	0.0251779	0.0369368	0.041754	0.0665675	0.0451375	0.0489111	0.0110076	0.0537762	0.00690052	0.0268841	0.0190293	0.0462046
0.001	0.0521119	0.0304214	0.0369242	0.0504348	0.070572	0.0356304	0.0370889	0.00794819	0.058927	-0.00616592	0.0198473	0.0202802	0.0459868
0.001	0.0874932	0.0399872	0.0460268	0.0467112	0.0764093	0.0396749	0.0379404	0.0176263	0.0391669	0.00274574	0.0149772	0.0233307	0.0392632
0.001	0.103748	0.0338462	0.0407064	0.0491908	0.0619031	0.0343588	0.0190804	0.00182927	0.04126	0.0124412	0.0280293	0.0229533	0.0475894
0.001	0.165754	0.0479705	0.0319489	0.0472391	0.0534846	0.03555	0.0250323	0.0258621	0.0357539	0.00686892	0.0279079	0.0138321	0.0444033
0.001	0.214125	0.039649	0.0297256	0.0434084	0.0496127	0.0241808	0.0029606	0.031947	0.0305021	0.00959808	0.0241952	0.0321862	0.0385151
0.001	0.386667	0.0358844	0.0253657	0.0374417	0.0489699	0.0244017	-0.0254319	0.0466128	0.0322581	0.00781983	0.018544	0.0168809	0.0409475
0.001	0.333333	0.0460305	0.0300991	0.0412155	0.0424649	0.0228055	0.0537794	0.0538688	0.010101	-0.00645161	0.0153721	0.032	0.0450627
0.001	0.267965	0.0383297	0.0330951	0.0481266	0.0402334	0.046595	0.0557185	-0.0157456	0.0210426	-0.00588928	0.0254593	0.00524059	0.0460539
0.001	0.238329	0.0543907	0.025377	0.0517598	0.0448466	0.0241088	0.0535077	-0.0172414	0.0194464	0.00613497	0.0287601	0.0230049	0.0342105
0.015006	0.168009	0.0510949	0.0376231	0.0591811	0.0401436	0.0300675	0.0697674	-0.00306644	0.0145719	0.00223714	0.0233631	0.00388711	0.0406455
0.001	0.0966206	0.0362726	0.0307085	0.0565422	0.0284045	0.0534801	0.0660401	0.0137457	0.000456204	0.00685417	0.0134627	0.00375427	0.0443196
0.001	0.084172	0.0380117	0.027838	0.0642168	0.0255912	0.0566478	0.0703871	0.00604839	0.0153488	0.0097386	0.0160623	0.0185936	0.0360467
0.001	0.102987	0.0354757	0.0200554	0.0582192	0.0276279	0.0554729	0.0671211	0.0149254	0.0115425	0.0215083	0.0432146	0.0297718	0.0442235
0.001	0.12435	0.0430651	0.0377806	0.0559723	0.0336562	0.0441885	0.0626959	0.014531	0.0188279	-0.00042735	0.0276258	0.0289933	0.0467988
0.001	0.104566	0.0382465	0.0372414	0.055355	0.0414622	0.0585674	0.0641587	0.0111857	0.0749933	0.0347583	0.0387835	0.0146736	0.0404963
0.001	0.123175	0.0342486	0.0271132	0.0466639	0.049491	0.0447357	0.0642529	0.019373	0.00865801	0.0291755	0.0358603	0.014142	0.0542
0.001	0.0456853	0.0339792	0.0337171	0.0523327	0.0373134	0.0410697	0.0622537	0.0203925	0.0718138	0.0285356	0.0382387	0.0288011	0.0598165
0.001	0.0749895	0.0391838	0.0264724	0.045274	0.0324756	0.0473637	0.0659603	0.0131422	0.103264	0.0387117	0.0405904	0.0210092	0.0407787
0.001	0.0768578	0.0502451	0.0205534	0.0601182	0.0302708	0.0595191	0.0557185	0.0288	0.0725443	0.0305218	0.0338213	0.0380341	0.0405777
0.001	0.029387	0.0434512	0.019842	0.0426597	0.0265205	0.0565026	0.067355	0.0322817	-0.00855397	0.0113599	0.0225058	0.0111985	0.0427638
0.001	0.0294372	0.0503552	0.0226297	0.0408123	0.023898	0.0692382	0.0527507	0.0290427	-0.0283333	0.0330003	0.0293183	0.0337263	0.0394492
0.0035404	0.0388007	0.058574	0.015949	0.0421096	0.0307611	0.0539683	0.0406977	0.0376106	-0.0551817	0.0190137	0.0231194	0.0364792	0.044838
0.001	0.0635673	0.0530316	0.0180784	0.0480316	0.035029	0.0498442	0.0658998	0.0516566	-0.0383275	0.0240861	0.0445923	0.0447174	0.0386633
0.001	0.0546529	0.0480541	0.0307629	0.0520273	0.0366268	0.0526861	0.0695991	0.0482665	-0.0469691	0.0204646	0.0177959	0.0510052	0.0373035
0.00566571	0.047343	0.063046	0.0329218	0.0609155	0.0345806	0.0538117	0.0392711	0.0373333	-0.0127784	0.0374927	0.0280718	0.0348939	0.0372453
0.0313563	0.0205198	0.038282	0.0337641	0.0539249	0.0376554	0.0550222	0.0603314	0.0447665	-0.0180403	0.037128	0.0419056	0.0321402	0.0527307
0.0169	0.0141691	0.038765	0.0309744	0.056031	0.038947	0.0595696	0.0641143	0.0449652	0.00899743	0.034957	0.0243247	0.0269343	0.0409496
0.001	0.0496267	0.050658	0.0176849	0.0544304	0.0389751	0.0634564	0.0522479	0.0496231	0.0609442	0.0270595	0.0182801	0.0332717	0.0373312
0.001	0.0877021	0.049851	0.0246632	0.0599329	0.0365354	0.0575554	0.0628141	0.0354565	0.039757	0.0384154	0.0108035	0.0369666	0.0415737
0.001	0.124373	0.0366613	0.0239935	0.0590844	0.0373295	0.0585437	0.0636334	0.0299845	-0.0125142	0.0543608	0.0453952	0.0401364	0.0335005
0.001	0.0902452	0.048474	0.0311558	0.0487844	0.0381158	0.0178441	0.0492676	0.027159	0	0.0331085	0.0377673	0.0538765	0.0273508
0.001	0.0588794	0.0382569	0.0250411	0.0529458	0.0318903	0.0450322	0.0373863	0.0306407	0.000618812	0.0212639	0.0414146	0.0341184	0.0355018
0.001	0.0201067	0.0379558	0.0271706	0.0501903	0.0378515	0.0382375	0.0301769	0.0442133	-0.0263557	0.0152225	0.0462701	0.01985	0.0346394
0.00865002	0.0413944	0.0414767	0.0270495	0.0437663	0.0506166	0.0502821	0.0293917	0.0516278	0.00594059	0.0223136	0.0354223	0.0544643	0.0205155
0.0728665	0.0789715	0.0364182	0.0333049	0.0467984	0.0483119	0.027354	0.0270083	0.0214844	-0.00777474	0.0164218	0.0652029	0.118314	0.0394824
0.127463	0.029304	0.030152	0.0255961	0.0431271	0.0468085	0.0278638	0.0263533	0.00654022	0.0182757	0.0187246	0.0271118	0.0206186	0.04022
0.103282	0.0801158	0.0283095	0.0263275	0.045628	0.0413343	0.0293478	0.0281996	-0.00409191	0.017581	0.0140621	0.0345304	0.0456485	0.0387431
0.0320102	0.0865484	0.0101185	0.0328701	0.0520127	0.0391775	0.0444059	0.0351068	-0.00151561	0.0222703	0.0125392	0.0413448	0.0192095	0.0351523
0.001	0.119134	0.00904159	0.0431307	0.0572796	0.046656	0.0425579	0.0357775	0.00179211	0.0255529	0.0267125	0.0272094	0.0301635	0.0451977
0.0277185	0.142521	-0.002614	0.0445361	0.0546743	0.0552928	0.0360324	0.033452	-0.00793651	0.0413292	0.026703	0.0305327	0.0264268	0.0444404
0.0711952	0.182292	0.0123735	0.0459653	0.0538634	0.0652685	0.0308779	0.0240113	-0.00458575	0.0465576	0.028169	0.0263613	0.0268841	0.0538944
0.001	0.0152504	0.0128134	0.0485913	0.0538884	0.0604219	0.0237245	0.0277113	0.00428922	0.0487599	0.0118644	0.0329055	0.0198473	0.0514997
0.001	0.00503522	0.0227066	0.0439539	0.0429053	0.0612474	0.0477403	0.0225417	0.00244349	0.0528316	0.00361211	0.036193	0.0149772	0.0526916
0.001	0.0253304	0.0168941	0.0415138	0.047012	0.0630073	0.0298661	0.0219914	0.00416171	0.0448889	0.00381056	0.0275999	0.0280293	0.0492354
0.001	0.112128	0.0497627	0.048296	0.0504269	0.0638298	0.027772	0.0316694	0.00531601	0.0284781	0.0152366	0.0230906	0.0279079	0.0535065
0.001	0.178527	0.0471917	0.0439126	0.0494309	0.0558171	0.0310924	0.0363409	0.00438871	0.0346592	0.0207051	0.0203901	0.0241952	0.0449511
0.001	0.252	0.0360252	0.0381679	0.0480615	0.0485184	0.0289601	0.0313552	0.0111524	0.0286374	0.0382387	0.0213657	0.018544	0.0415058
0.001	0.227139	0.0424734	0.0343857	0.0442534	0.0595259	0.0262172	0.0768877	0.0377416	0.0211216	0.0129488	0.0302661	0.0153721	0.041813
0.001	0.161647	0.0422621	0.0298625	0.0417996	0.0433905	0.0326215	0.0518519	0.0177089	0.011477	-0.00605327	0.0236064	0.0254593	0.0500475
0.001	0.193585	0.042115	0.0294695	0.0477303	0.0381369	0.031941	0.0718258	0.015063	0.0148238	-0.00210526	0.0143266	0.0287601	0.0444908
0.001	0.190739	0.0454825	0.032945	0.0604634	0.0501428	0.0422701	0.0739778	-0.000914355	0.0209824	0.00175439	0	0.0233631	0.0477484
0.001	0.272727	0.0432034	0.0288577	0.060068	0.0464773	0.0436285	0.0594887	-0.00352451	0.0194197	0.0194572	0.012058	0.0134627	0.0449373
0.001	0.175661	0.0468482	0.0293948	0.0604106	0.0272653	0.0315375	0.0597429	-0.00750898	0.0226223	0.011063	0.0114682	0.0160623	0.0365517
0.001	0.110396	0.0490683	0.0321502	0.0596158	0.0234451	0.0532426	0.0704376	-0.000677966	0.0108922	0.0132533	0.0335023	0.0432146	0.0493396
0.001	0.0951793	0.0377083	0.0333392	0.0566572	0.0337449	0.0639491	0.0620388	-0.00816326	0.00700935	0.0138135	0.0381475	0.0276258	0.0432767
0.001	0.112249	0.0423729	0.0247961	0.0522849	0.0371594	0.0512515	0.045688	-0.00102145	-0.00135538	0.0242729	0.0333805	0.0387835	0.0476819
0.001	0.111214	0.0388394	0.0397543	0.046798	0.0410542	0.0486708	0.0601406	-0.00486787	0.0585904	0.0117371	0.0257182	0.0358603	0.0460963
0.001	0.118133	0.0393944	0.0234068	0.0558956	0.0486198	0.0532968	0.063762	-0.00656304	0.0500562	0.0130268	0.0391402	0.0382387	0.0374793
0.001	0.07298	0.0368009	0.0264325	0.0482786	0.0673874	0.047276	0.0690593	0.0165868	0.0141304	0.0221039	0.033557	0.0405904	0.0502812
0.001	0.0661224	0.038456	0.0270786	0.0423312	0.0282486	0.0319328	0.0672646	0.0388611	0.0104867	0.0344828	0.0366221	0.0338213	0.0584884
0.001	0.0791912	0.031591	0.027242	0.0539555	0.0319716	0.0399278	0.0706363	0.0279146	0.0314939	0.0280374	0.0449679	0.0225058	0.0549884
0.001	0.0568965	0.039118	0.0250199	0.037739	0.0349353	0.0531287	0.0460415	0.0183997	0.013295	0.0332889	0.0513264	0.0293183	0.0380197
0.001	0.046542	0.0450678	0.0181463	0.0433138	0.0335235	0.0606573	0.0639399	0.0230276	-0.00669942	0.0289411	0.0296999	0.0231194	0.0495963
0.001	0.0601041	0.048403	0.0156401	0.0449869	0.0310119	0.0588235	0.0531707	0.0325685	-0.0498116	-0.00335121	0.0414865	0.0445923	0.0365832
0.001	0.010064	0.0583895	0.0108216	0.0412129	0.0293137	0.0495156	0.0460903	0.0355963	-0.0284238	0.0117052	0.0165193	0.0177959	0.0357009
0.001	0.0213169	0.0508001	0.0222131	0.0477005	0.031671	0.0530973	0.0371582	0.0518983	-0.0259319	0.0176198	0.0341336	0.0280718	0.0460329
0.0117806	0.01654	0.0595468	0.0232076	0.0512495	0.0366345	0.045983	0.070874	0.0387164	-0.012436	0.00353149	0.0367308	0.0419056	0.0457698
0.0210773	0.0534003	0.0403135	0.0219371	0.0514706	0.0347014	0.0586987	0.0681627	0.0385409	-0.00998668	0.0205025	0.0199968	0.0243247	0.0400161
0.0197183	0.0458882	0.0571646	0.028026	0.0542666	0.0307395	0.0529765	0.0470163	0.0483764	-0.0017094	0.0268315	0.0319508	0.0182801	0.0430604
0.0571955	0.0202899	0.0409777	0.0253767	0.0562092	0.0405095	0.0486111	0.0522434	0.0514397	-0.00105079	0.0199081	0.0345996	0.0108035	0.0431448
0.001	0.0509839	0.0414303	0.0233838	0.0661172	0.0375378	0.0519205	0.065698	0.0464749	0.0180375	0.0491905	0.0480337	0.0453952	0.0421094
0.001	0.0775231	0.0471455	0.0332863	0.0698637	0.0319844	0.072488	0.0606061	0.0396476	0.0161154	0.0342079	0.0301063	0.0377673	0.0319087
0.001	0.0816697	0.0551149	0.0264741	0.0657054	0.0365939	0.0539623	0.0611465	0.0485981	0.0168584	0.0335868	0.0173883	0.0414146	0.041904
0.001	0.0387338	0.0553761	0.028332	0.0534277	0.0371681	-0.00391623	0.0509138	0.0354391	0.0180124	0.041307	0.0220955	0.0462701	0.0325486
0.001	0.110595	0.0496597	0.0277108	0.0495581	0.042394	0.0282613	0.0302077	0.037037	-0.0136509	0.020059	0.0211836	0.0354223	0.0416
0.001	0.11355	0.0190577	0.0231907	0.0462339	0.0289548	0.0447835	0.0291554	0.0336862	-0.00223714	0.0324035	0.03001	0.0218531	0.0387193
0.001	0.0518719	0.0334781	0.0363675	0.0460008	0.0306159	0.0314286	0.00628931	0.0136364	0	0.0200756	0.0492399	0.0271118	0.0319016
0.0446566	0.0804044	0.0454032	0.0261758	0.0377662	0.0420958	0.0509408	0.0120247	-0.0065703	-0.0225214	0.0228878	0.040724	0.0345304	0.0243983
0.0485687	0.112534	0.0354199	0.0301179	0.04492	0.0410106	0.0393519	0.0130463	-0.0108803	0.0071972	0.0265772	0.0602911	0.0413448	0.0510854
0.016578	0.0708117	0.0194049	0.019978	0.0503226	0.0379384	0.0367194	0.0105049	0.00343214	0.0100968	0.0332295	0.0341937	0.0272094	0.0423585
0.00605246	0.0662516	0.0248649	0.0280081	0.0505947	0.0402576	0.035078	0.00424328	0.00892326	0.0108741	0.0345731	0.029583	0.0305327	0.0469822
0.001	0.123167	0.0179334	0.0262222	0.0554747	0.0375887	0.023335	0.018297	-0.00121655	0.0134933	0.0178759	0.0284155	0.0263613	0.0459534
0.001	0.24959	0.017284	0.0419214	0.0578258	0.0399859	0.0449294	0.020671	0.0194286	0.0537849	0.0239312	0.0296985	0.0329055	0.0420109
0.00912048	0.25722	0.0193822	0.0410095	0.0578211	0.0413282	0.0474383	0.0181694	0.00658837	0.060014	0.0217451	0.02998	0.036193	0.0450224
0.03125	0.0290237	0.0204559	0.0396494	0.0509223	0.0446018	0.0356621	0.0313448	0.000609385	0.0501573	0.00987306	0.03125	0.0275999	0.0505164
0.001	-0.00492608	0.0124844	0.0374721	0.0480542	0.0569452	0.0293856	0.0176416	0.0198754	0.0430399	0.0332951	0.0201311	0.0230906	0.0405405
0.001	0.0121629	0.0188172	0.0392196	0.0510577	0.0662109	0.039761	0.0284176	0.00216802	0.0234742	0.0377891	0.0213055	0.0203901	0.0470387
0.001	0.0708748	0.0188221	0.0457464	0.0505537	0.0774181	0.029036	0.0518192	-0.00653951	0.0208941	0.0196078	0.0271111	0.0213657	0.0588904
0.001	0.136929	0.053801	0.0360876	0.0501294	0.0713735	0.0305273	0.0185226	-0.00484555	0.0447619	0.0147059	0.0184435	0.0302661	0.0544815
0.001	0.192208	0.044556	0.0392356	0.0519778	0.0617998	0.0193329	0.0246962	-0.0224753	0.0371783	0.0166021	0.0102374	0.0236064	0.0379872
0.001	0.122995	0.031405	0.0391878	0.0559189	0.052577	0.0365951	0.033245	0.0121987	0.0114606	0.0215947	0.0147458	0.0143266	0.041232
0.001	0.0521119	0.041047	0.0400628	0.0500497	0.0636462	0.0353909	0.0345996	0.0103842	0.00696517	0.00552792	0.0221721	0	0.0530366
0.001	0.124072	0.0384788	0.0426939	0.0508651	0.0591074	0.0479754	0.0654791	0.00639163	0.0163528	0.0172414	0.0350343	0.012058	0.0536051
0.001	0.132565	0.0362694	0.0440788	0.0544638	0.0568182	0.0347094	0.0770642	0.0271773	0.0188402	0.0271481	0.0149364	0.0114682	0.0359845
0.001	0.122355	0.0404572	0.0428513	0.0494771	0.0550978	0.0452358	0.0624381	0.00150376	0.0283306	0.0103845	0.0249249	0.0335023	0.0559399
0.001	0.102614	0.0478302	0.0417629	0.050468	0.0428477	0.0544913	0.0479876	0.00910518	0.0219524	0.0164456	0.0327447	0.0381475	0.0470244
0.001	0.117562	0.0450422	0.0339562	0.0498871	0.0354892	0.043345	0.0514804	0.0178117	0.0095648	0.0076497	0.0210436	0.0333805	0.0475018
0.001	0.0947062	0.0449491	0.0183035	0.0497328	0.0290237	0.0530921	0.0529876	0.00543305	0.00204128	0.0195323	0.0308642	0.0257182	0.044804
0.001	0.14672	0.0454545	0.0292788	0.0450972	0.0307281	0.0614923	0.0537322	0.00168634	0.00343938	0.0201342	0.030286	0.0391402	0.0453089
0.001	0.104771	0.0425658	0.0328762	0.0601291	0.0338132	0.0511396	0.0518773	-0.00276243	-0.00711642	0.0335893	0.0393148	0.033557	0.0445067
0.001	0.0823731	0.0423149	0.029923	0.0598969	0.0408922	0.0438835	0.0676568	0.00274914	-0.00563698	0.0249347	0.0320725	0.0366221	0.0458901
0.001	0.0577159	0.0432767	0.0330876	0.0509467	0.0616316	0.0349768	0.0735813	-0.00458415	-0.00395928	0.0292028	0.051149	0.0449679	0.0433701
0.001	0.145511	0.0265005	0.0207056	0.0453941	0.0826706	0.0331797	0.0753687	-0.00134862	0.00173511	0.017761	0.0458934	0.0513264	0.0533747
0.001	0.0904471	0.029745	0.0301491	0.0514457	0.087802	0.0380791	0.07522	0.0324551	0.0320668	0.0186884	0.042735	0.0296999	0.0577448
0.001	0.0849237	0.0359796	0.0224421	0.0483271	0.0263992	0.039261	0.0680292	0.0430063	0.0430548	0.0229237	0.0395968	0.0414865	0.0595453
0.001	0.0787655	0.0363075	0.0275298	0.040778	0.024373	0.057429	0.059952	0.031405	0.0195402	0.0202987	0.0358278	0.0165193	0.042708
0.001	0.0349462	0.0446499	0.024713	0.0561338	0.0264419	0.0537353	0.0596342	0.0339493	-0.00926956	0.0114695	0.0400119	0.0341336	0.0417206
0.001	0.0421101	0.0566163	0.0190457	0.0460435	0.0341895	0.0437168	0.0614786	0.0106707	-0.0206271	0.0224512	0.0501873	0.0367308	0.0388918
0.001	0.0675024	0.0637301	0.0153071	0.0425258	0.0342857	0.05626	0.0563695	0.0285714	-0.0437682	0.00530223	0.0394265	0.0199968	0.039725
0.00258016	0.0509915	0.040074	0.00973899	0.0539384	0.031005	0.0500876	0.0615308	0.039884	-0.031945	0.00988836	0.0341231	0.0319508	0.0541365
0.001	0.017797	0.0592672	0.0151818	0.0475989	0.0373665	0.0512006	0.0449636	0.0488155	-0.0337838	0.0155535	0.0331064	0.0345996	0.053885
0.001	0.0336473	0.046878	0.00950413	0.0415959	0.0323493	0.0500184	0.063171	0.0286929	-0.0175193	0.0214391	0.0213709	0.0480337	0.0388293
0.0264984	0.0517082	0.0517824	0.0194952	0.0463576	0.0304325	0.0417517	0.0611329	0.0339443	-0.0210745	0.0295408	0.0321355	0.0301063	0.0495627
0.072327	0.0214094	0.0426029	0.0197093	0.0483112	0.0333919	0.0256506	0.0434526	0.0349515	-0.00839291	0.024971	0.0404265	0.0173883	0.0456045
0.0380334	0.0113821	0.0421622	0.0192346	0.0507066	0.03159	0.0494506	0.044078	0.03773	0.00374022	0.03621	0.0336696	0.0220955	0.0340109
0.001	0.0435606	0.0363316	0.027103	0.0530258	0.0386525	0.0592306	0.0397247	0.0385208	-0.0244973	0.0365404	0.0255079	0.0211836	0.031575
0.00175592	0.0764212	0.0419139	0.0341898	0.0443331	0.0445272	0.0393701	0.0393504	0.0311705	-0.000556174	0.0284495	0.0342368	0.03001	0.0419704
0.001	0.0687361	0.0336134	0.0281776	0.0603834	0.0377958	-0.0033761	0.0450563	0.0366559	0.0321932	0.0302833	0.0214512	0.0492399	0.026873
0.001	0.0895397	0.0348808	0.0254203	0.0498715	0.0333741	0.0247362	0.0384732	0.0111549	0.035643	0.0248602	0.027305	0.040724	0.0395233
0.001	0.130758	0.036805	0.0273269	0.0465347	0.0357583	0.0143222	0.0289185	0.00132013	-0.00079766	0.0197723	0.0275874	0.0602911	0.0507063
0.001	0.092233	0.0270798	0.0218056	0.0482645	0.0315679	0.0444204	0.0482914	-0.017074	0.00750577	0.0359505	0.05	0.0228432	0.0394424
0.024284	0.0537727	0.0485298	0.0308708	0.0480423	0.0358467	0.0518039	0.0214742	-0.0174399	-0.0184502	0.026383	0.0426265	0.0250531	0.0471947
0.052865	0.0769936	0.0374728	0.0223656	0.050505	0.043028	0.05617	0.0224349	0.0136192	-0.00630517	0.0249931	0.0637443	0.0341937	0.0496966
0.0321054	0.0844564	0.0312879	0.0237992	0.0545305	0.0436832	0.0525864	0.0170812	0.0242309	-0.011781	0.0321401	0.0640066	0.029583	0.0526493
0.0293299	0.0283912	0.0182796	0.0229885	0.0556013	0.0383715	0.0376135	0.00460547	0.0292695	0.0074813	0.0403473	0.018055	0.0284155	0.0384885
0.001	0.0404889	0.0154025	0.028063	0.0542986	0.0384547	0.0412518	-0.00541229	0.0383758	0.00259853	0.04617	0.0243686	0.0296985	0.0365554
0.001	0.0542701	0.0141278	0.0308571	0.0532985	0.0420595	0.0450742	0.00410483	0.0363144	0.0167696	0.033944	0.0143121	0.02998	0.0434783
0.001	0.272093	0.0220523	0.0431593	0.0538539	0.0417266	0.0267137	0.00962434	0.0282603	0.048188	0.0392699	0.0327061	0.03125	0.0441613
0.00526874	0.19603	0.0166965	0.0377005	0.060997	0.0394316	0.0294054	0.0149634	-0.0185488	0.0527229	0.0258918	0.0344673	0.0201311	0.0509946
0.0152372	0.0470641	0.00371999	0.0294895	0.0548009	0.0345791	0.0452459	0.0237179	0.0169195	0.0426591	0.0329279	0.0335986	0.0213055	0.0480365
0.001	0.0330015	0.0128696	0.0305835	0.0507211	0.0373226	0.0475973	0.0320306	0.0286907	0.0249738	0.030656	0.0421781	0.0271111	0.0396376
0.001	0.0285714	0.0151251	0.0342754	0.0549128	0.0617151	0.0329422	0.030859	0.00623286	0.0169492	0.0357143	0.0378734	0.0184435	0.0461997
0.001	0.0539652	0.00258264	0.0361495	0.0522738	0.0856075	0.0253684	0.0154946	0.000771407	0.028737	0.0189655	0.0177434	0.0102374	0.0469671
0.001	0.0387374	0.0449711	0.032958	0.0482507	0.0765732	0.0332922	0.0634127	0.0107701	0.0212766	0.0254795	0.0255282	0.0147458	0.0482115
0.001	0.0511392	0.0425963	0.0379387	0.0580403	0.0687907	0.0326034	0.140515	0.0121413	0.0162913	0.0158646	0.0244648	0.0221721	0.0585214
0.001	0.0876623	0.0428571	0.0380165	0.05939	0.0620212	0.0334432	0.0998921	-0.000535045	0.00796524	0.0399027	0.0147578	0.0350343	0.0564773
0.001	0.0463104	0.0394126	0.0362969	0.0483038	0.0761633	0.0320299	0.0509709	0.0225641	0.00782014	0.0359325	0.0235294	0.0149364	0.046164
0.001	0.103272	0.0466537	0.0452424	0.0469903	0.0634308	0.0347583	0.0676266	0.0503415	0.0131132	0.0271186	0.0151355	0.0249249	0.0447866
0.001	0.0805369	0.0389181	0.0486574	0.0579562	0.07187	0.0436708	0.0643577	0.033744	0.0235266	0.0258003	0.0266643	0.0327447	0.0543478
0.001	0.0855397	0.0413053	0.0504032	0.04465	0.0738488	0.0416581	0.0461458	0.0138801	0.0265487	0.0361197	0.0178337	0.0210436	0.0460786
0.001	0.0673854	0.0460526	0.0405767	0.0545599	0.054194	0.0428076	0.0440908	0.0174419	0.00826848	0.028685	0.0209924	0.0308642	0.0561069
0.001	0.08087	0.0530316	0.0399042	0.0531665	0.0400135	0.0460076	0.0571584	0.0135008	-0.0099108	0.0353228	0.0246586	0.030286	0.0440799
0.001	0.112399	0.046169	0.036965	0.0477883	0.0366896	0.0556337	0.0656064	0.0256252	0.0125829	0.0347222	0.0259691	0.0393148	0.0416516
0.00477757	0.105494	0.0399613	0.0353723	0.0510949	0.0358459	0.061076	0.0719861	0.0249066	0.02123	0.0264789	0.0293794	0.0320725	0.0307744
0.001	0.078	0.0438891	0.0363244	0.0517274	0.0395575	0.0606466	0.0588925	0.0149444	0.00937155	0.0433915	0.0405827	0.051149	0.0436681
0.001	0.106814	0.0458327	0.0364849	0.0523801	0.0519772	0.0612933	0.0586197	0.00625	0.0193197	0.0338048	0.0310201	0.0458934	0.0430947
0.001	0.153527	0.0551378	0.0368983	0.0511086	0.0810811	0.0648292	0.0667037	0.00952381	0.0338497	0.047709	0.0352025	0.042735	0.0274185
0.001	0.12561	0.0408583	0.0300991	0.0568685	0.0936113	0.0527392	0.0644087	0.0287356	0.0325477	0.0543145	0.0461489	0.0395968	0.0530191
0.001	0.0867839	0.0271105	0.0245505	0.0566714	0.0892223	0.0545197	0.0663616	0.0487805	0.0203753	0.0391795	0.0386688	0.0358278	0.0346437
0.001	0.0945274	0.0326241	0.0214781	0.0410959	0.0317934	0.0449412	0.0637184	0.030358	0.033795	0.0155039	0.04668	0.0400119	0.0793966
0.001	0.162362	0.0425963	0.0244071	0.0588022	0.0339343	0.0463303	0.0652439	0.0258549	0.0135397	0.00773395	0.0453709	0.0501873	0.04814
0.001	0.0854937	0.0295943	0.0257448	0.0527497	0.0331754	0.0498632	0.0509638	0.0290953	-0.0301901	0.0225133	0.0494096	0.0394265	0.0338304
0.001	0.0795569	0.0523651	0.0208988	0.0466733	0.0275618	0.0509056	0.0489914	0.00557769	-0.0153139	-0.00765585	0.0610039	0.0341231	0.042153
0.00378496	0.128514	0.06376	0.0129161	0.0506855	0.0366696	0.0453304	0.0540958	0.00239617	-0.0421856	0.0102157	0.0489297	0.0331064	0.0484411
0.00151621	0.107735	0.0587638	0.0182972	0.0435668	0.0332799	0.0575014	0.0586773	0.0094304	-0.0298165	-0.00269724	0.0335212	0.0213709	0.057971
0.001	0.042457	0.0470022	0.00862896	0.0364614	0.0333812	0.0421485	0.0667333	0.0127628	-0.0296671	0.00781929	0.0377639	0.0321355	0.0586864
0.001	0.0331011	0.0422072	0.0145867	0.0363859	0.0389333	0.0332703	0.0610212	0.0127569	-0.0215363	0.0374021	0.030931	0.0404265	0.039938
0.0379668	0.0539237	0.0539166	0.00806777	0.0474012	0.0408856	0.035254	0.0638512	0.0196965	-0.00712736	0.0364921	0.0318555	0.0336696	0.041803
0.0691686	0.0236356	0.0464246	0.0143842	0.0526537	0.0374545	0.0236533	0.0507246	0.0104359	-0.00921942	0.0254213	0.0301818	0.0255079	0.0453495
0.001	0.0213623	0.0380377	0.0183431	0.0437432	0.0376614	0.0215125	0.0300668	0.0146312	-0.00255102	0.023803	0.0327816	0.0342368	0.046729
0.001	0.0459982	0.0353843	0.0303403	0.0575824	0.0359635	0.0390836	0.0239155	0.0195962	-0.0214168	0.0296736	0.0157748	0.0214512	0.0416747
0.0123762	0.080228	0.0335176	0.030721	0.0517056	0.0379298	0.0226423	0.0366492	0.0141822	0.00262123	0.045188	0.0305963	0.027305	0.0445405
0.001	0.0978957	0.0419569	0.026098	0.0648863	0.0380818	0.004212	0.0277534	-0.000971817	0.00482356	0.041263	0.0479945	0.0275874	0.0376923
0.001	0.157078	0.0297872	0.0246057	0.047619	0.0361877	-0.00539447	0.0331361	-0.013653	0.0274352	0.0165344	0.0252243	0.05	0.0305593
0.001	0.0955691	0.0342187	0.0265263	0.0410071	0.0332508	0.0244687	0.0220006	-0.0159453	0.003	0.0157629	0.0351383	0.0426265	0.0461013
0.001	0.0664351	0.0291311	0.0260317	0.0530831	0.0346913	0.0315875	0.0389831	-0.0130597	0.00771208	0.0201801	0.0486111	0.0637443	0.066056
0.0217238	0.0326633	0.0372013	0.0242863	0.0432628	0.0397163	0.0520206	0.0420122	0.00953482	-0.0195667	0.0246988	0.0755309	0.0237745	0.0355771
0.001	0.0364834	0.0421232	0.0184831	0.0483839	0.0427229	0.051461	0.0261898	0.0234393	-0.0161517	0.0230657	0.0435304	0.018055	0.0545032
0.0196375	0.0181672	0.0245506	0.0209044	0.0479307	0.0344828	0.0466128	0.0154835	0.0132317	-0.0310263	0.0335383	0.0741646	0.0243686	0.0538155
0.001	0.00952375	0.0419929	0.0369878	0.044316	0.0342191	0.0473212	0.0127483	0.0165078	-0.00987433	0.0277411	0.104016	0.0143121	0.0624
0.0153846	0.0957489	0.02221	0.0192351	0.0474684	0.0402783	0.0498496	0.0155689	0.0329831	0.00735458	0.035807	0.017959	0.0327061	0.0382222
0.001	0.118512	0.0153392	0.0321839	0.0563725	0.0440885	0.0400922	0.0114804	0.0452418	0.021515	0.0347966	0.0269893	0.0344673	0.043964
0.001	0.231114	0.00819672	0.0323924	0.0592119	0.0503411	0.0489047	0.013245	0.018533	0.0246122	0.0326975	0.016118	0.0335986	0.0486769
0.001	0.121026	0.0228031	0.0439466	0.0605403	0.0421567	0.0234864	0.0225335	0.0419674	0.038367	0.0424993	0.0277778	0.0421781	0.0434489
0.040347	0.114128	0.0141865	0.0337265	0.0541744	0.0328212	0.0300903	0.0135218	0.0150068	0.0377435	0.0357555	0.0353357	0.0378734	0.0428571
0.001	0.172043	0.0186981	0.0374463	0.0544484	0.0425532	0.0420527	0.020936	0.00314735	0.0192926	0.0501693	0.0244748	0.0177434	0.0516729
0.001	0.0782974	0.0163823	0.0327405	0.0571881	0.0389243	0.0345905	0.0377196	0.0963597	0.0114723	0.0213953	0.0284454	0.0255282	0.0474749
0.001	0.053882	0.0036242	0.0308779	0.0535714	0.053021	0.0460233	0.028466	0.103431	0.0293128	0.0237056	0.0482071	0.0244648	0.0426415
0.001	0.0531959	0.00276869	0.039644	0.0510133	0.0727574	0.0594104	0.0341955	0.100206	0.0152284	0.0324888	0.0204717	0.0147578	0.0427481
0.001	0.047536	0.0448437	0.037929	0.055087	0.0671365	0.0409605	0.0869038	0.0898606	0.0139356	0.0358505	0.0173097	0.0235294	0.0440546
0.001	0.0469548	0.0417938	0.0481442	0.0675701	0.0624235	0.0437992	0.15106	0.0774648	0.0175607	0.0389791	0.00374384	0.0151355	0.0527485
0.001	0.0269553	0.0361773	0.0380652	0.0604342	0.0668626	0.0330538	0.0733125	0.0630713	0.0115774	0.043418	0.0196578	0.0266643	0.0485437
0.001	0.0621004	0.0469248	0.0447446	0.0581373	0.0825796	0.0303744	0.0621939	0.049047	0.0182076	0.0320646	0.0211119	0.0178337	0.0471221
0.001	0.0816031	0.0440912	0.0438298	0.0489565	0.0745769	0.0367538	0.0583153	0.0103457	0.0213891	0.0677366	0.0167633	0.0209924	0.0431197
0.001	0.0933985	0.0299278	0.0443557	0.0527568	0.0828729	0.0418714	0.0412896	0.00567721	0.0124193	0.042519	0.0439436	0.0246586	0.0552436
0.001	0.0967742	0.0381883	0.0401639	0.0544323	0.085177	0.0445425	0.0503993	0.00590551	0.0128777	0.0452998	0.0187477	0.0259691	0.0378136
0.001	0.0916231	0.0420904	0.040676	0.0609709	0.073249	0.0345357	0.0433124	0.0202638	0.0147307	0.0315917	0.0165576	0.0293794	0.0498163
0.001	0.126341	0.0434353	0.0389007	0.0569106	0.0447658	0.0413223	0.0566248	0.0183893	0.0282954	0.0242367	0.0206595	0.0405827	0.0419258
0.00470836	0.0562347	0.0395554	0.0359014	0.0521273	0.0431558	0.0484962	0.0678784	0.0128993	0.0360848	0.00924784	0.0299939	0.0310201	0.0394171
0.001	0.0559408	0.0420784	0.0359496	0.0511364	0.0462466	0.0650593	0.0659026	0.0305064	0.0399467	0.00809611	0.0362779	0.0352025	0.0347731
0.001	0.105542	0.0393606	0.0357995	0.0467976	0.0551892	0.0488923	0.0513612	0.0328267	0.0181044	0.0352532	0.0310584	0.0461489	0.0510041
0.001	0.118201	0.0404571	0.0330951	0.0529777	0.0651037	0.0538201	0.0425777	0.0395747	0.0966329	0.0132789	0.028888	0.0386688	0.035858
0.001	0.0973	0.0499395	0.0333526	0.0505395	0.0763231	0.0637171	0.0512603	0.0382353	0.0599776	0.0295545	0.0453635	0.04668	0.0443403
0.001	0.063723	0.035241	0.033275	0.0482579	0.0822809	0.0548254	0.0640449	0.0155605	0.0400451	0.0315039	0.0405117	0.0453709	0.0429716
0.001	0.142684	0.0324685	0.0424655	0.0462879	0.0777202	0.0652491	0.0669359	0.03002	0.0253723	0.0366133	0.0628591	0.0494096	0.0454709
0.001	0.0885357	0.0321002	0.0257811	0.0512445	0.029484	0.0328867	0.0620449	0.0358535	0.00882872	0.0185827	0.047619	0.0610039	0.0676605
0.001	0.100523	0.0376569	0.0239755	0.0429799	0.0285714	0.0405487	0.0672346	0.00195503	0.0175655	-0.0184975	0.03938	0.0489297	0.03766
0.001	0.0965476	0.0466122	0.0254938	0.0459661	0.0333802	0.0315953	0.0676739	0.0320902	0.0220736	-0.00568182	0.044956	0.0335212	0.037037
0.001	0.0871737	0.0411746	0.0167328	0.05001	0.0437119	0.0351778	0.0533955	0.0245023	-0.0234542	-0.00146199	0.0472089	0.0377639	0.0516892
0.001	0.0356789	0.062542	0.0261744	0.049941	0.0392086	0.0406563	0.0570478	0.0163424	-0.0127542	0.00691664	0.0240526	0.030931	0.0454545
0.001	0.131767	0.0762952	0.0145537	0.0399848	0.0336999	0.0436681	0.0621814	-0.00149925	-0.0218464	-0.00881489	0.0417975	0.0318555	0.0537834
0.001	0.110297	0.0459061	0.0160868	0.0387956	0.032971	0.0305134	0.0591133	-0.0172891	-0.0246613	0.0142037	0.03788	0.0301818	0.0586831
0.001	0.108257	0.0371348	0.0210954	0.0444533	0.0306466	0.0238353	0.0500349	-0.00400534	-0.0280311	0.0306274	0.0375154	0.0327816	0.0421541
0.001	0.14048	0.0573722	0.0164706	0.0534503	0.0356704	0.0154997	0.0427467	-0.00622339	-0.0337157	0.0193906	0.0529109	0.0157748	0.0341379
0.0127175	0.0729693	0.0354331	0.0112056	0.0545601	0.0359687	0.000728332	0.0446009	0	-0.0264346	0.0227671	0.0530582	0.0305963	0.0460666
0.0418106	0.0488121	0.0461822	0.0342936	0.0503868	0.0409083	0.0058427	0.0355058	0.00502828	-0.0139839	0.0242272	0.0834269	0.0479945	0.048268
0.001	0.038387	0.0340282	0.0111857	0.0546541	0.043797	0.00219974	0.0316148	-0.00641221	-0.00739426	0.0351343	0.0695713	0.0252243	0.0550087
0.0004773	0.100237	0.0264309	0.0241969	0.0513919	0.0353791	0.0109686	0.0383724	0.00914724	-0.0244809	0.043851	0.0674447	0.0351383	0.040877
0.001	0.111111	0.043524	0.0233546	0.0399313	0.0393956	0.0101046	0.0332509	0.0041866	-0.0178862	0.0196209	0.0474321	0.0486111	0.0432393
0.001	0.118962	0.0419075	0.0271444	0.0444397	0.0442068	0.00911289	0.0266591	-0.00303214	0.0868435	0.0163728	0.0446429	0.0755309	0.0463014
0.001	0.174187	0.0378984	0.0280413	0.0395956	0.0401141	0.0811847	0.0354811	-0.0134801	0.105111	0.00835476	0.052762	0.0435304	0.0480735
0.001	0.0917474	0.0292427	0.025641	0.049403	0.0345196	0.106264	0.0330745	0.0125654	0.042004	0.0260125	0.060283	0.0741646	0.0493868
0.001	0.0480202	0.0406623	0.0277955	0.0543417	0.0399145	0.0347115	0.0294695	0.00496992	0.0440011	0.0225468	0.0611858	0.0279126	0.0369057
0.0361539	0.0411311	0.027027	0.0269467	0.0567001	0.0353857	0.0610249	0.0442968	0.0108747	0.0258449	0.0267348	0.0366569	0.017959	0.0523026
0.0390179	0.0689805	0.0261097	0.0237445	0.0523246	0.0397292	0.0539619	0.0329114	0.0239547	0.00877743	0.0397071	0.0822222	0.0269893	0.0518969
0.0399032	0.0635838	0.0293023	0.0246809	0.0505487	0.0404771	0.0347739	0.018782	0.0273556	-0.0238027	0.0350685	0.0672436	0.016118	0.0575457
0.001	0.118644	0.0242705	0.0259291	0.0469411	0.0434151	0.0477766	0.0230017	0.0488152	-0.00411523	0.0325828	0.0692698	0.0277778	0.0481586
0.0176607	0.11982	0.0263897	0.0138981	0.0535963	0.0411208	0.0371864	0.0164788	0.0813752	-0.00442696	0.0235199	0.0122004	0.0353357	0.0405509
0.001	0.20793	0.0277935	0.0250632	0.0584665	0.0479541	0.0421931	0.0180653	0.160745	0.003156	0.0435271	0.0190411	0.0244748	0.0497872
0.0129096	0.269737	0.0312231	0.032535	0.0643884	0.0455872	0.0296875	0.0212395	0.196007	0.0110816	0.0351922	0.0117914	0.0284454	0.0438944
0.00114895	0.218859	0.0128971	0.0483733	0.0597445	0.0389243	0.0282659	0.020493	0.245055	0.0271836	0.0366948	0.0241395	0.0482071	0.0554817
0.0241832	0.247525	0.0163823	0.0299795	0.053015	0.0354233	0.032587	0.0105263	0.106679	0.0367832	0.0358064	0.0371689	0.0204717	0.0476023
0.001	0.35575	0.0037831	0.0319149	0.0550531	0.0361227	0.0424469	0.0189655	0.140613	0.0215589	0.0272263	0.0212489	0.0173097	0.0582326
0.001	0.29862	0.00700054	0.033649	0.0601652	0.0461594	0.0550665	0.0211853	0.160169	0.0132562	0.0297672	0.0217856	0.00374384	0.0597303
0.001	0.222164	0.011114	0.0415048	0.0636327	0.0635648	0.0621284	0.0416268	0.0872483	0.0330316	0.0504937	0.0451848	0.0196578	0.0364908
0.001	0.161026	0.00794303	0.0437081	0.0519196	0.0682909	0.0511647	0.0635083	0.101544	0.0219754	0.0301783	0.0289303	0.0211119	0.0562488
0.001	0.138293	0.0408719	0.0455655	0.0535714	0.0670411	0.0507291	0.0285946	0.0858274	0.0178485	0.0485933	0.0318966	0.0167633	0.0497667
0.001	0.0986717	0.0448213	0.0541914	0.0612408	0.0754275	0.0318096	0.0422474	0.0253613	0.0187952	0.0507569	0.0151428	0.0439436	0.0478147
0.001	0.0626057	0.0499234	0.0523369	0.0586414	0.0961916	0.0444395	0.0619108	0.00826887	0.0151625	0.0394973	0.0112888	0.0187477	0.0499461
0.0117187	0.0976785	0.0406358	0.0401719	0.0543107	0.0895948	0.0362716	0.0597292	0.00818926	0.0140912	0.0647549	0.028151	0.0165576	0.0465468
0.001	0.1712	0.041526	0.0424217	0.0527909	0.0976657	0.0326797	0.0473291	0.00864198	0.0178179	0.0308943	0.00748379	0.0206595	0.0454083
0.001	0.169063	0.0356322	0.0465904	0.0587344	0.0921514	0.0393215	0.0489019	0.0134754	0.009031	0.0422381	0.0323144	0.0299939	0.0444731
0.01723	0.108987	0.0335887	0.0394984	0.05231	0.0889259	0.0304282	0.0580046	0.042709	0.0173872	0.0240328	0.0319652	0.0362779	0.0521525
0.0163705	0.148904	0.046629	0.0348837	0.0537236	0.0568503	0.0377222	0.0679943	0.0264057	0.0347366	0.00946915	0.0304731	0.0310584	0.0458078
0.001	0.126316	0.0418435	0.0355809	0.0551036	0.0515641	0.0394448	0.0685086	0.0308564	0.0356347	0.0181295	0.0194301	0.028888	0.0470612
0.00193871	0.062439	0.0507931	0.0346878	0.0546551	0.0522375	0.0473186	0.0614996	0.015873	0.0202977	0.0266909	0.0265252	0.0453635	0.0387193
0.0156863	0.0696587	0.0446735	0.0307428	0.0452261	0.0742537	0.0362401	0.079356	0.0181927	0.0103093	0.0211251	0.0259996	0.0405117	0.0399277
0.0124031	0.0593406	0.038916	0.0265077	0.0425532	0.0820896	0.0413578	0.0676521	0.0203188	0.0743077	0.0367893	0.0387665	0.0628591	0.0423225
0.001	0.161933	0.0405904	0.0223801	0.0472782	0.0857988	0.035827	0.0431531	0.0316716	0.0871624	0.0363677	0.0334225	0.047619	0.0337382
0.001	0.16	0.0494926	0.0269245	0.0455916	0.0845829	0.0253049	0.0405714	0.0190202	0.0407089	0.0344536	0.0351563	0.03938	0.0429779
0.001	0.0843137	0.0407688	0.0304646	0.0510355	0.0763431	0.0372647	0.0477845	0.00931677	-0.00201904	0.0448945	0.0322717	0.044956	0.0399442
0.001	0.0999487	0.0359611	0.0253432	0.0518106	0.0570152	0.0310371	0.0529934	0.0204678	0.0194553	0.0472511	0.037551	0.0472089	0.0580038
0.001	0.0396901	0.0468135	0.0211388	0.0459022	0.0314753	0.0201265	0.0553441	0.0198614	-0.00610998	0.023864	0.0223547	0.0240526	0.0518834
0.001	0.0188679	0.0321256	0.0253879	0.0581825	0.0256948	0.0230639	0.064375	-0.00982928	-0.00596282	0.0260688	0.0432802	0.0417975	0.050755
0.001	0.00649627	0.0591476	0.0289555	0.0403178	0.0349206	0.0247847	0.0615183	0.0250627	-0.00896552	0.00562008	0.0452169	0.03788	0.053285
0.001	0.0626086	0.0677118	0.0174369	0.0401417	0.0363896	0.0108881	0.0411924	0.00858034	-0.0285139	-0.0253651	0.052161	0.0375154	0.0559695
0.001	0.0571827	0.0423339	0.0220249	0.0398482	0.0295795	0.0138587	0.0418605	-0.00287356	-0.0117797	0.00328108	0.0216268	0.0529109	0.0432624
0.0091663	0.103253	0.0661385	0.0212838	0.0433599	0.032784	0.00706595	0.0548735	-0.0108626	-0.0155376	0.0104483	0.0481786	0.0530582	0.0556745
0.001	0.147573	0.0528097	0.0153793	0.0480974	0.034706	0.00772267	0.0423307	-0.00990712	-0.0254477	0.0276527	0.0362965	0.0834269	0.0614214
0.00285505	0.186129	0.0503751	0.0160133	0.0569969	0.0378515	0.0157222	0.0506757	-0.00274809	-0.0295469	0.0261712	0.0348229	0.0695713	0.051273
0.001	0.23673	0.0629426	0.0136622	0.0526316	0.0361274	-0.0010627	0.0485118	-0.00458575	-0.0413508	0.021753	0.0483069	0.0674447	0.0424815
0.167451	0.19346	0.0593522	0.017199	0.0535784	0.0277532	-0.0040404	0.0478391	-0.00918555	-0.025641	0.0139259	0.103065	0.0474321	0.0594023
0.154864	0.14177	0.0389904	0.0228401	0.053399	0.0386543	0.00940203	0.0379519	-0.000618429	-0.0200282	0.0262707	0.11912	0.0446429	0.0536218
0.001	0.109152	0.0334983	0.0183274	0.0480577	0.0421818	0.0143767	0.0323603	0.0030581	-0.0162778	0.0367605	0.0760741	0.052762	0.055896
0.001	0.165649	0.0359637	0.0269923	0.0411184	0.0375204	0.0169298	0.0502874	0.0116522	-0.00606761	0.0207101	0.0745068	0.060283	0.0374866
0.001	0.178947	0.0366197	0.0312099	0.0412264	0.0435414	0.0301508	0.0476687	-0.00805249	0.00727273	0.021681	0.0513292	0.0611858	0.0378341
0.001	0.164557	0.0443636	0.0254072	0.043981	0.0430262	0.0603698	0.0412135	0.00378017	0.095898	0.0106195	0.0331256	0.0366569	0.049903
0.001	0.134888	0.0355525	0.0260648	0.0433668	0.0462087	0.0932018	0.0412937	0.0129611	0.149721	0.000627746	0.0543963	0.0822222	0.039631
0.001	0.110253	0.0408719	0.0285594	0.0448087	0.0365354	0.0759988	0.0302166	0.0299625	0.0561395	0.0255746	0.0402174	0.0672436	0.0547877
0.001	0.0722891	0.033317	0.0259002	0.0628834	0.0416368	0.0300565	0.0281849	0.00560586	0.0455172	0.00378549	0.0316157	0.0328413	0.0608725
0.0237401	0.10524	0.0307873	0.0237288	0.0420168	0.0394831	0.046729	0.0398884	0.00834431	0.0266828	0.0349281	0.0285618	0.025074	0.0602578
0.0705664	0.13313	0.025772	0.0201563	0.0477038	0.0467658	0.0457903	0.0340626	0.0231451	0.0224189	0.0190904	0.0451178	0.0122004	0.0608568
0.0469154	0.147648	0.0399663	0.0196406	0.0378682	0.0411008	0.03847	0.0330976	0.037594	-0.0142901	0.0317848	0.049505	0.0190411	0.0506878
0.001	0.175634	0.0227639	0.0149846	0.0478752	0.041022	0.0394281	0.0324061	0.0954255	-0.026348	0.0193966	0.0599965	0.0117914	0.0593062
0.0304653	0.236699	0.0168295	0.0104005	0.047958	0.0367954	0.0409801	0.0158461	0.171658	-0.0355358	0.0258262	0.0240811	0.0241395	0.0480089
0.001	0.249529	0.0239913	0.0197734	0.0488315	0.0420382	0.0368234	0.0257559	0.257628	-0.0110365	0.0274129	0.0230738	0.0371689	0.0453906
0.0378105	0.237601	0.0320602	0.0266041	0.0469552	0.0388278	0.0405028	0.0328744	0.2837	0.00508962	0.0238221	0.0263559	0.0212489	0.0468645
0.0241667	0.213411	0.0217454	0.0422535	0.0462451	0.0376718	0.0399211	0.0183697	0.248663	0.0334156	0.0336665	0.0198556	0.0217856	0.0524529
0.0257827	0.271091	0.0148499	0.0313283	0.0428485	0.0398293	0.0393777	0.0160576	0.124788	0.0292925	0.014658	0.0257336	0.0451848	0.0482523
0.001	0.369552	0.0139814	0.0365954	0.0503282	0.0459559	0.0508159	0.0198886	0.0873303	0.027824	0.0218655	0.0295302	0.0289303	0.0584869
0.001	0.390947	0.012735	0.0362611	0.051035	0.0495487	0.0513141	0.0249811	0.0444785	0.00945455	0.027471	0.0187597	0.0318966	0.0474595
0.001	0.330227	0.0165446	0.0361936	0.0541831	0.0656216	0.0447942	0.0469361	-0.0150538	0.00692042	0.0439224	0.0253165	0.0151428	0.0601284
0.001	0.247768	0.0215254	0.0452962	0.0547264	0.0715313	0.0598361	0.0375997	0.00223839	0.013314	0.0374171	0.0434983	0.0112888	0.0328292
0.001	0.229327	0.000573723	0.0446721	0.0562927	0.0670732	0.0478908	0.0119072	0.0143737	0.00716675	0.0492156	0.0558351	0.028151	0.0608329
0.001	0.186579	0.0463048	0.0450744	0.059489	0.0702268	0.0441235	0.0370179	0.0145202	0.0128672	0.0495553	0.0512821	0.00748379	0.032418
0.001	0.194265	0.0627824	0.0467213	0.0554059	0.0861509	0.049139	0.0505405	0.019437	0.0120368	0.0457046	0.0194698	0.0323144	0.0487117
0.001	0.227384	0.049496	0.0367047	0.0577697	0.0927564	0.0485604	0.0628768	0.0383938	0.0120255	0.0601885	0.0176852	0.0319652	0.0481502
0.001	0.213816	0.0388278	0.0335083	0.0507925	0.0932903	0.0484725	0.0755915	0.0349014	0.0203581	0.040765	0.0369352	0.0304731	0.0403509
0.0166929	0.231016	0.0461538	0.0472313	0.0499543	0.0926971	0.045437	0.057041	0.0437613	0.0152035	0.0345404	0.0548601	0.0194301	0.0444483
0.0217166	0.25641	0.0472418	0.0394951	0.0569737	0.102682	0.0355161	0.0633141	0.0618748	0.0216369	0.00613497	0.0649912	0.0265252	0.0481225
0.0014398	0.24933	0.0545288	0.0328298	0.054362	0.074898	0.0377429	0.0877297	0.0254795	0.0417522	0.00906667	0.0541176	0.0259996	0.060093
0.001	0.171882	0.0492435	0.0364112	0.0520274	0.0584229	0.0492984	0.0644242	0.0147511	0.0290249	0.0145083	0.03375	0.0387665	0.0504803
0.001	0.160998	0.0315229	0.0345793	0.0555452	0.0606889	0.0382653	0.0632841	0.017486	0.00975134	0.016932	0.0186025	0.0334225	0.0483481
0.0286822	0.169373	0.0471354	0.0330097	0.0543582	0.0853359	0.0356277	0.0724802	0.0112289	0.0085883	0.0255367	0.0318302	0.0351563	0.047958
0.0295056	0.135834	0.040038	0.0206317	0.0527892	0.0896525	0.035384	0.0652363	0.00511894	-0.00101574	0.0284483	0.028559	0.0322717	0.0497788
0.0330033	0.189827	0.0417253	0.0197487	0.0494394	0.0777027	0.0283886	0.0634599	0.0176211	0.0676609	0.0256955	0.0423103	0.037551	0.0525206
0.0106883	0.200723	0.0530339	0.0411272	0.0500736	0.0647803	0.026002	0.0351494	0.0223015	0.031016	0.00965981	0.0325683	0.0223547	0.039324
0.001	0.165699	0.0530766	0.0262619	0.046246	0.0515281	0.00885936	0.0361516	0.00492611	0.0304325	0.0269346	0.0252723	0.0432802	0.0454545
0.001	0.0402169	0.0360295	0.0265043	0.0484928	0.0400826	0.0185545	0.0423265	0.021601	0.0193662	0.032447	0.0268266	0.0452169	0.0527032
0.001	0.0161357	0.0311751	0.0321543	0.0463306	0.0391841	0.0227955	0.0434783	0.0156636	0.0665825	0.0408284	0.0381907	0.052161	0.051543
0.001	0.0330852	0.0379821	0.0286252	0.0516626	0.0383659	0.0113127	0.0530351	0.0309671	0.000722022	0.0310798	0.0377994	0.0216268	0.0539216
0.001	0.00879297	0.0404412	0.031337	0.0564317	0.034385	-0.00394273	0.0500329	-0.00608329	-0.0174507	0.0500161	0.0462576	0.0481786	0.0417885
0.001	0.0390785	0.0730985	0.027439	0.0400619	0.0268349	0.0297366	-0.00644765	0.0042123	-0.0115183	0.0254121	0.0379827	0.0362965	0.0486193
0.001	0.0675676	0.0477532	0.0247492	0.048188	0.0279547	0.0440123	0.00896057	-0.0149362	-0.0208402	-0.00614828	0.0568141	0.0348229	0.0488521
0.00261091	0.104506	0.0429773	0.0250169	0.0482439	0.034677	0.0229059	0.004662	-0.0251938	-0.0192666	0.000348797	0.0370811	0.0483069	0.0462583
0.001	0.190757	0.0631561	0.0159316	0.0467689	0.0332983	0.00360144	0.041604	-0.0209832	-0.0155595	0.00327439	0.0209836	0.103065	0.0584785
0.001	0.246169	0.0527578	0.0207069	0.0437394	0.0402289	0.00444774	0.0384322	-0.0113568	-0.016578	0.011772	0.0434393	0.11912	0.0518924
0.0423231	0.259721	0.0554459	0.0200803	0.0583253	0.0350721	0.0119878	0.0425475	-0.00651273	-0.0288175	0.0135348	0.0348748	0.0760741	0.0459376
0.226749	0.260583	0.0472561	0.0179593	0.049933	0.0307585	-0.0129335	0.0392314	-0.0115221	-0.0217028	0.0131378	0.0845139	0.0745068	0.0460237
0.153722	0.257275	0.041745	0.0141023	0.0482156	0.0328705	-0.000207771	0.0357422	-0.0176307	-0.0289673	0.00790167	0.101826	0.0513292	0.0552456
0.00263567	0.225145	0.0423077	0.0172597	0.058756	0.0380969	0.0160692	0.02833	-0.00247525	-0.0279759	0.0140056	0.104097	0.0331256	0.0467083
0.001	0.222042	0.0350547	0.0222409	0.050136	0.0434	-0.00271455	0.0313589	0.00815464	-0.0119259	0.0119213	0.0794798	0.0543963	0.0477618
0.000810356	0.242502	0.0373267	0.0343949	0.0493151	0.0389797	0.0445344	0.0392201	-0.00092908	-0.00679163	0.0156723	0.0601913	0.0402174	0.0425571
0.0146782	0.243494	0.0388526	0.0261242	0.0414436	0.0454131	0.0493157	0.0514469	-0.00643974	-0.00267937	0.0181818	0.0496939	0.0316157	0.0514019
0.0327644	0.137931	0.0421388	0.0319462	0.0418972	0.0548647	0.0693253	0.0500128	-0.012068	0.0651737	0.0110375	0.0404624	0.0285618	0.0456835
0.0315877	0.163684	0.0270891	0.0302906	0.0401969	0.0443332	0.0878553	0.0311457	-0.00641519	0.143818	0.00028401	0.0395904	0.0451178	0.0490984
0.0173627	0.265215	0.0357802	0.029511	0.0415867	0.0407942	0.0831556	0.0365374	0.0102587	0.108101	0.0116709	0.0324306	0.049505	0.0681859
0.0312779	0.259002	0.0251151	0.0233723	0.0538765	0.0422025	0.036185	0.0377948	0.027353	0.052035	0.0054582	0.0366002	0.0159677	0.0527929
0.0696816	0.242494	0.0260948	0.0145402	0.0481639	0.0426101	0.0445606	0.0316768	0.0272392	0.008926	0.0165563	0.0247875	0.0240811	0.0476509
0.0598699	0.198691	0.0368932	0.0184409	0.0504976	0.0475154	0.0214949	0.040091	0.0178282	0.0400241	0.00566802	0.0277271	0.0230738	0.0536418
0.0146828	0.170798	0.0387662	0.0209728	0.0513993	0.044235	0.0172244	0.0371622	0.0523124	-0.00120846	0.0132254	0.0529238	0.0263559	0.0589647
0.0509308	0.216862	0.0312711	0.0129693	0.0522852	0.0457112	0.0332553	0.0403952	0.098242	-0.0229488	0.0086568	0.0426126	0.0198556	0.052757
0.0228849	0.193863	0.0252242	0.0162924	0.0496093	0.0438421	0.0287882	0.0429307	0.108181	-0.0177914	0.00424568	0.0252683	0.0257336	0.0549298
0.0361539	0.186834	0.0230896	0.0163567	0.0480648	0.0360231	0.0414556	0.0456522	0.122217	-0.00518135	0.0230316	0.0303355	0.0295302	0.0528335
0.0340196	0.185561	0.031614	0.0143627	0.0456476	0.0458615	0.0345763	0.0397651	0.115699	-0.000854336	0.00217628	0.0272232	0.0187597	0.0535487
0.0111223	0.272358	0.0200756	0.0452946	0.0456281	0.0407061	0.050287	0.0274424	0.0886618	0.0267192	0.00810282	0.0253785	0.0253165	0.058906
0.0278232	0.434447	0.00884397	0.0328975	0.0487401	0.0420198	0.0373281	0.0450108	0.024878	0.0259563	0.0128996	0.0317248	0.0434983	0.0513472
0.0705394	0.337571	0.0120563	0.027286	0.0417768	0.052593	0.0404506	0.0459711	0.00228137	0.0303324	0.00726257	0.0227687	0.0558351	0.0400555
0.001	0.320027	0.0116923	0.029472	0.047619	0.0434939	0.0397764	0.0274247	-0.0126792	0.000243368	0.00627901	0.0261219	0.0512821	0.0385746
0.001	0.265852	0.0116689	0.031956	0.0572705	0.065749	0.0493927	0.0127726	0.00469208	0.0097704	-0.00716479	0.0264646	0.0194698	0.0492893
0.001	0.242424	0.0223261	0.035409	0.0586636	0.0853793	0.0579345	0.00728528	0.0268436	0.0211335	0.0201973	0.0453907	0.0176852	0.0459075
0.001	0.226513	0.000300391	0.0465069	0.049459	0.0906692	0.0438279	0.0179076	0.0324074	0.00964785	0.0193865	0.0621774	0.0369352	0.0649657
0.001	0.281867	0.0533591	0.0460217	0.0488183	0.0728429	0.0515063	0.0570891	0.0455604	0.00980873	0.0286867	0.06247	0.0548601	0.0249042
0.001	0.34104	0.0634291	0.0453617	0.044399	0.0756396	0.0487658	0.0598821	0.056172	0.00964933	0.0566651	0.0186982	0.0649912	0.0479817
0.001	0.361675	0.0560675	0.0494888	0.0437206	0.0821448	0.0465542	0.0739092	0.0575113	0.0218259	0.0600551	0.0239893	0.0541176	0.0486227
0.001	0.339286	0.0459123	0.0419963	0.050246	0.0828887	0.0677083	0.0904175	0.019341	0.028254	0.0247269	0.0593237	0.03375	0.0564263
0.001	0.249293	0.0439328	0.0326196	0.0578512	0.104366	0.0555337	0.0843155	0.0239651	0.0194081	0.0180671	0.0850397	0.0186025	0.0425423
0.000641448	0.217167	0.0438609	0.0411613	0.0537634	0.114498	0.0418674	0.0669204	0.0528346	0.0168526	0.0418806	0.0694	0.0318302	0.0501742
0.001	0.166253	0.0460497	0.0391645	0.0531437	0.0931067	0.036117	0.0711587	0.0219721	0.0247857	0.047816	0.107573	0.028559	0.0504007
0.001	0.209889	0.0411534	0.0358082	0.058131	0.0666667	0.0444489	0.0559441	0.00554745	0.00887574	0.0337079	0.0337972	0.0423103	0.0521179
0.001	0.263671	0.0461845	0.0376419	0.0579522	0.0583106	0.0239941	0.0580243	0.00440806	0.0113794	0.0333717	0.0281976	0.0325683	0.043986
0.001	0.221801	0.0509479	0.0428	0.0538651	0.0722869	0.0286162	0.0628155	0.00939261	-0.00086881	0.027957	0.0290838	0.0252723	0.0764455
0.0325913	0.267824	0.0367724	0.033146	0.0523944	0.0806234	0.0339286	0.0754558	-0.00407141	0.00406835	0.0057337	0.0317217	0.0268266	0.0538785
0.0418189	0.258993	0.0383782	0.0235272	0.045841	0.0730147	0.0716485	0.0681885	0.00960645	0.0241915	0.0293425	0.0370858	0.0381907	0.047023
0.0312243	0.22758	0.0469571	0.0268857	0.0490966	0.0649728	0.0485437	0.0487733	0.0198915	0.0230415	0.0549085	0.0372765	0.0377994	0.0426035
0.00862811	0.230005	0.0487018	0.0322339	0.047037	0.0417827	0.0155789	0.0266004	0.020266	0.0400861	0.0434992	0.0275428	0.0462576	0.054935
0.00439751	0.0676691	0.037037	0.0299335	0.0530627	0.0340599	0.0127315	0.0417292	0.0285312	0.0425345	0.0193459	0.0327022	0.0379827	0.048482
0.0018018	0.0428274	0.032646	0.0322226	0.0525925	0.0455373	0.00325983	0.0301932	0.0124688	0.019424	0.0280319	0.0128876	0.0568141	0.0481909
0.0123231	0.000745614	0.0347642	0.0349206	0.0644498	0.0510335	0.015839	0.0332288	0.0239351	-0.00702403	0.0418006	0.0389016	0.0370811	0.0496807
0.00742679	0.0586796	0.0450281	0.0289532	0.0617874	0.0470311	-0.00172563	0.0330789	0.000414079	-0.0308039	0.0465605	0.0406639	0.0209836	0.0528192
0.001	0.0859911	0.0709571	0.0263879	0.0595753	0.0398118	0.0347026	0.0206219	-0.0122095	-0.0216949	0.0290842	0.0302062	0.0434393	0.0530856
0.001	0.149454	0.0479962	0.0243079	0.0587762	0.0456267	0.0294345	0.0150261	-0.0191041	-0.0302234	0.0133507	0.0401722	0.0348748	0.0391119
0.001	0.199105	0.0373007	0.0245494	0.050297	0.0399716	0.00907862	0.013707	-0.0194745	-0.0133175	0.00466273	0.0207177	0.0845139	0.0466443
0.028163	0.20172	0.0651749	0.0299983	0.0506667	0.037908	-0.0225977	-0.0105525	-0.0200486	-0.0130017	0.00914888	0.0298103	0.101826	0.0492077
0.0673076	0.172038	0.0597238	0.0196864	0.0471028	0.0348837	-0.00648915	0.00840336	-0.0124962	-0.00910747	0.0244953	0.0328349	0.104097	0.0512604
0.0532704	0.244847	0.0457938	0.0340988	0.050113	0.0312114	0.0288102	0.0192969	-0.0115968	-0.0177847	0.00942873	0.0427457	0.0794798	0.0531154
0.212934	0.349411	0.0486009	0.026253	0.0483537	0.0285513	0.0434393	0.0339623	-0.000609756	-0.0110745	0.00140017	0.0871369	0.0601913	0.0500695
0.300529	0.297125	0.0533286	0.0148912	0.0530459	0.0367869	0.0405852	0.0327429	0.000953895	-0.016839	-0.00649901	0.0689596	0.0496939	0.0516164
0.108172	0.28337	0.0311584	0.0165724	0.0463401	0.036062	0.0495979	0.0274447	0.00347113	-0.0140371	0.00454804	0.0597817	0.0404624	0.0469432
0.001	0.24595	0.0325313	0.0187311	0.044898	0.0392651	0.0520478	0.0265849	0.0187866	-0.00849858	0.00137855	0.0454871	0.0395904	0.0538899
0.00760451	0.256604	0.0345091	0.0216819	0.0560345	0.0404851	0.0543103	0.0360468	-0.0123095	0.00127259	0.0159868	0.0649991	0.0324306	0.0635303
0.00378626	0.343462	0.0345088	0.0300752	0.0521015	0.0360181	0.0371681	0.0473781	0.00907341	0.00340909	0.0193477	0.0464217	0.0366002	0.0649585
0.001	0.4	0.0390611	0.0285714	0.0501248	0.0457153	0.06218	0.056553	-0.00781841	0.0390559	0.0084262	0.0630558	0.0247875	0.0457263
0.001	0.377159	0.0421212	0.0238738	0.0493167	0.0447653	0.121236	0.0645388	-0.00566135	0.148168	0.0125341	0.0880065	0.0277271	0.0559428
0.0263605	0.26921	0.0535141	0.0238241	0.0425838	0.0410762	0.0741656	0.0552083	-0.00844091	0.151622	-0.00463594	0.045689	0.0529238	0.0638298
0.0151228	0.389538	0.0385814	0.0340221	0.0497894	0.03713	0.0351617	0.0572281	0.0363218	0.0896057	0.000830335	0.0476364	0.0260166	0.0510873
0.0287569	0.307002	0.032654	0.0204918	0.0534759	0.0386799	0.0425963	0.0421836	0.0384431	0.00947603	0.00187517	0.0551655	0.0252683	0.0513875
0.0106571	0.363517	0.0435403	0.022869	0.0588235	0.0411404	0.0377209	0.0505651	0.0427481	-0.00340241	0.0111881	0.079413	0.0303355	0.0538475
0.001	0.41532	0.0302394	0.0256299	0.0493239	0.0417717	0.0235263	0.0525714	0.0783316	-0.0153746	0.00885906	0.0769231	0.0272232	0.0553147
0.0211423	0.380729	0.0314406	0.0145251	0.0454713	0.043938	0.0267903	0.0577428	0.0395844	-0.0261233	0.00389105	0.0516168	0.0253785	0.0505495
0.059163	0.350813	0.0266588	0.0211776	0.0475333	0.0421653	0.0310192	0.0559733	0.000469263	-0.0138977	0.0117122	0.0318949	0.0317248	0.0759326
0.0538057	0.243575	0.01387	0.0159222	0.0417759	0.0374235	0.0257407	0.0448018	0.0248915	-0.00704887	0.0125996	0.0120295	0.0227687	0.0584639
0.000355698	0.173101	0.0249584	0.00677596	0.0503275	0.0369973	0.0419821	0.0416093	0.0214008	0.00517464	0.00753834	0.015582	0.0261219	0.0957284
0.0282486	0.178849	0.0178102	0.0124918	0.0571429	0.0379837	0.0452239	0.052861	-0.00318302	0.0204972	0.0177515	0.0245468	0.0264646	0.0493052
0.0146984	0.231618	0.0127307	0.0422656	0.0569984	0.0404895	0.0451582	0.0394191	-0.00652482	0.0155862	0.00877441	0.0366073	0.0453907	0.0521921
0.0325427	0.264574	-0.00101317	0.0430464	0.0493806	0.0412225	0.0406015	0.0542835	0.00956938	0.0173997	0.0093819	0.014862	0.0621774	0.0505739
0.0531915	0.244444	0.00649954	0.0350842	0.0508536	0.046083	0.0423862	0.0315941	0.0167494	0.00392157	0.0170517	0.025971	0.06247	0.0457703
0.001	0.234043	0.0162162	0.0382824	0.0543335	0.0709677	0.0426939	0.0436864	0.0424282	0.00576092	0.0143014	0.0289553	0.0186982	0.0531777
0.000991048	0.17125	0.0167569	0.0350163	0.0455938	0.0865825	0.0464646	0.0172314	0.063816	0.0132639	0.0138351	0.0241788	0.0239893	0.0486136
0.00130201	0.247184	-0.00278897	0.0345804	0.0441176	0.0845771	0.0451382	-0.00221729	0.0577922	0.0127827	-0.00628587	0.0301645	0.0593237	0.0560915
0.001	0.20595	0.0517789	0.0408952	0.048166	0.0775994	0.0520186	0.0184582	0.0373158	0.0075999	0.0160321	0.0437399	0.0850397	0.0498364
0.001	0.288796	0.0420891	0.0399023	0.0581222	0.0855287	0.0475825	0.0547471	0.0438071	0.0152064	0.0337649	0.0601068	0.0694	0.0352577
0.001	0.233309	0.0561382	0.0339191	0.0496035	0.0893145	0.0527332	0.0553955	0.0454395	0.0145481	0.0253536	0.0541256	0.107573	0.0486819
0.001	0.229043	0.0392556	0.0453048	0.0544205	0.0999814	0.0640528	0.0658647	0.0290256	0.00777832	0.0265087	0.0615876	0.0337972	0.0546903
0.001	0.286855	0.0333475	0.0460526	0.0560173	0.105583	0.060571	0.0754139	0.0340441	0.002185	0.0306178	0.0813358	0.0281976	0.0565262
0.001	0.257642	0.0283825	0.0364078	0.0587799	0.104	0.0552314	0.0835646	0.0353414	0.019388	0.0444183	0.0678268	0.0290838	0.054643
0.0194761	0.258295	0.0294071	0.0437575	0.0570702	0.0883473	0.0387628	0.0713154	-0.000274198	0.0272965	0.0463814	0.0620805	0.0317217	0.0581886
0.001	0.267845	0.0239486	0.040239	0.055727	0.0671741	0.0321787	0.0685521	0.0159078	0.00971952	0.0428189	0.0599647	0.0370858	0.0544662
0.001	0.240275	0.0177202	0.0343331	0.0545186	0.0598068	0.00439518	0.0527504	0.00287026	-0.0112489	0.0510249	0.0197133	0.0372765	0.0473859
0.001	0.213545	0.0276423	0.0336167	0.0519947	0.0694573	0.028536	0.0620458	0.00184615	-0.020815	0.0445078	0.0311052	0.0275428	0.0491863
0.00353913	0.201681	0.0229967	0.0331255	0.0461653	0.0674962	0.0692981	0.0758929	0.00243754	0.00193531	0.0116785	0.0315928	0.0327022	0.0594203
0.0107616	0.282496	0.03517	0.0279115	0.0465536	0.0526316	0.0806082	0.0849134	0.0176614	0.0086698	0.0399635	0.0303433	0.0128876	0.0546612
0.0153583	0.28	0.0415083	0.0284751	0.0527263	0.0552565	0.0345956	0.0854871	0.00874284	0.0206862	0.051217	0.0283101	0.0389016	0.0600462
0.0113636	0.227712	0.0480403	0.0319501	0.0544726	0.0475355	0.00636943	0.0786117	0.028676	0.0412869	0.0564663	0.0305525	0.0406639	0.0495319
0.0208145	0.222641	0.0431811	0.0264728	0.0594995	0.0327869	-0.00466258	0.0549385	0.028949	0.0262544	0.0123514	0.033913	0.0302062	0.060555
0.0129061	0.0484873	0.0430984	0.038892	0.0443167	0.027036	-0.0058451	0.0534582	0.0280715	-0.000325839	0.0353753	0.0285714	0.0401722	0.0487805
0.001	0.0172932	0.0355179	0.0308039	0.0635969	0.0451427	0.00404131	0.0436879	0.0191033	-0.000319387	0.0164835	0.0270793	0.0207177	0.0512334
0.0060606	0.0585603	0.0916598	0.0267874	0.0606631	0.0571534	0.0010002	0.0362891	0.0197835	0.010989	0.0414263	0.0436708	0.0298103	0.0464297
0.0125991	0.170342	0.0887742	0.0280939	0.0596175	0.0520487	0.0070819	0.0403816	0.0148685	-0.00539892	0.0472618	0.0299122	0.0328349	0.0507825
0.0187771	0.221862	0.0378749	0.0218598	0.069303	0.0442968	0.0293147	0.027878	-0.00248668	-0.00956633	0.0340557	0.0493288	0.0427457	0.0581589
0.001	0.223655	0.0477607	0.0243379	0.0659231	0.0503704	0.0253579	0.020336	-0.0149254	-0.027476	-0.00258398	0.0467649	0.0871369	0.0581191
0.0225498	0.247454	0.052921	0.0461657	0.0523333	0.0445562	0.0433231	0.0269615	-0.00771367	-0.0108883	0.0048675	0.0271799	0.0689596	0.0499833
0.0867052	0.230314	0.0648163	0.03789	0.0483596	0.0386643	0.0396382	0.00281162	-0.0141278	0.00521105	0.0143282	0.0477855	0.0597817	0.0507813
0.153605	0.273904	0.0652595	0.0219595	0.0510727	0.0373533	0.048139	-0.00212831	-0.0106516	0.0127551	0.00851517	0.0485853	0.0454871	0.0573907
0.172334	0.343598	0.0546417	0.0283795	0.0502437	0.0423195	0.0399807	0.0100446	-0.0107079	0.00416017	0.0229824	0.0553644	0.0649991	0.0535163
0.296926	0.3424	0.0508718	0.0246781	0.053804	0.0374661	0.0501129	0.0260683	-0.00119474	0.0102821	0.0158383	0.0437376	0.0464217	0.0555258
0.20259	0.322703	0.0455288	0.0139623	0.0557377	0.0389563	0.0549587	0.0350549	0.0218314	0.0143748	0.0155763	0.0443651	0.0630558	0.0589292
0.0128068	0.354839	0.0404984	0.0165975	0.0461538	0.0331441	0.0630439	0.0301926	0.0318665	0.00528821	-0.00163934	0.0615496	0.0880065	0.061105
0.001	0.315217	0.0353218	0.0183452	0.0448466	0.0426852	0.0524246	0.0245383	0.0479512	0.0132137	0.0292304	0.0582722	0.045689	0.0680913
0.001	0.415627	0.0416896	0.0313368	0.0441406	0.0336755	0.0555305	0.0454658	0.00588524	0.0197044	0.023542	0.0958014	0.0476364	0.0624573
0.01191	0.480844	0.0337932	0.0247219	0.0469592	0.0355548	0.0483871	0.0539808	0.00518623	0.000942507	0.0205717	0.111598	0.0551655	0.0531005
0.000829859	0.510682	0.0355746	0.0318841	0.0391889	0.042422	0.0718057	0.0446583	0.00237427	0.0336251	0.0245464	0.0949525	0.079413	0.0616181
0.0615177	0.527581	0.0358593	0.0324702	0.0391017	0.0408788	0.0510949	0.0661499	0.0193662	0.0749088	-0.00718659	0.0618052	0.0769231	0.0620512
0.0311027	0.398658	0.0428494	0.0226263	0.0507203	0.04061	0.0624	0.0468305	0.000684463	0.0872755	0.0035432	0.0525131	0.0516168	0.0667206
0.001	0.478697	0.0450778	0.0239434	0.044995	0.0322694	0.0217918	0.0509702	0.00117233	0.0645856	-0.00187819	0.0700848	0.0212766	0.057318
0.0442478	0.505798	0.0441964	0.0288969	0.0459681	0.0347872	0.0434573	0.0518234	0.0374251	0.0353522	0.00662954	0.0694912	0.0120295	0.0492035
0.0239194	0.454059	0.0371795	0.0233528	0.0492514	0.0456761	0.0222648	0.0559441	0.0913532	-0.0267803	0.00686016	0.0505335	0.015582	0.0588645
0.001	0.444646	0.0275184	0.0166631	0.0567515	0.045166	0.0390054	0.0527497	0.0407174	-0.0268434	0.0191991	0.0894074	0.0245468	0.0433718
0.001	0.481593	0.0139012	0.0114103	0.0514419	0.039173	0.0398847	0.0438812	0.00409935	-0.0295858	0.00811731	0.0539089	0.0366073	0.0447348
0.0152991	0.506989	0.00503845	0.0139535	0.0557663	0.0387625	0.0299517	0.0367439	0.000503525	-0.00442758	0.0221789	0.0535123	0.014862	0.0816795
0.0496407	0.537688	0.0202407	0.0126078	0.0492764	0.0394291	0.0371075	0.0358079	0.0237122	-0.0217391	0.0259892	0.0199297	0.025971	0.0634984
0.001	0.329591	0.0220546	0.0159423	0.0487934	0.034191	0.0468307	0.0365047	-0.0051313	0.0221734	0.0391061	0.0220713	0.0289553	0.068914
0.038175	0.220404	0.0274637	0.0167719	0.0544433	0.0301027	0.0458937	0.0574069	0.0027907	0.015656	0.0139244	0.0405229	0.0241788	0.056244
0.0384407	0.289308	-0.00239808	0.0413999	0.0535052	0.0339993	0.0672036	0.0641399	0.0245678	0.00782689	0.019037	0.0475825	0.0301645	0.0511408
0.0411985	0.190283	0.0233687	0.0360008	0.0510646	0.0368664	0.0577778	0.0765735	0.0371991	0.00097561	0.0337589	0.0241527	0.0437399	0.0384258
0.0479704	0.16113	0.0189182	0.0269314	0.0543663	0.0515014	0.0454447	0.0423798	0.0475888	0.00245942	0.0324767	0.0368782	0.0601068	0.0686239
0.023773	0.105223	0.0278224	0.0276442	0.0508649	0.068688	0.0361111	0.086132	0.0492914	-0.00647017	0.0176471	0.0346109	0.0541256	0.0524732
0.0129963	0.107898	0.0022779	0.0326588	0.0471631	0.0733533	0.0432149	0.0525682	0.0448878	0.00650759	0.0104074	0.0314725	0.0615876	0.0417797
0.001	0.124198	-0.0106201	0.0363273	0.050299	0.0810088	0.0520812	0.00403388	0.0409105	0.00907975	-0.00933126	0.0205707	0.0813358	0.0630096
0.001	0.0535064	0.0650047	0.0319872	0.0512321	0.104932	0.0470612	0.0285539	0.032084	0.0136723	0.0228356	0.0245614	0.0678268	0.052355
0.001	0.0573816	0.0469902	0.038247	0.0496324	0.0914067	0.0564758	0.0437956	0.0321199	0.0259117	0.0129672	0.0336116	0.0620805	0.038454
0.001	0.0914385	0.0420143	0.0338511	0.0537675	0.0829375	0.0430026	0.0483153	0.0436177	0.00863309	0.0214938	0.0696035	0.0599647	0.0486777
0.001	0.164524	0.0426035	0.0404124	0.0577033	0.0991888	0.0485876	0.0767357	0.0547762	0.0111004	0.0213447	0.0717557	0.0197133	0.0595668
0.001	0.200825	0.044949	0.032427	0.0546718	0.0944102	0.0500189	0.0702427	0.0574881	0.0159275	0.0209726	0.0714439	0.0311052	0.055219
0.001	0.250904	0.0303223	0.0369055	0.0542607	0.102234	0.051189	0.068189	0.0548852	0.0265445	0.0516949	0.0578334	0.0315928	0.0510973
0.0141701	0.154822	0.000987167	0.0449882	0.0521882	0.0829876	0.056017	0.0807799	0.00960995	0.0290436	0.0522421	0.0333883	0.0303433	0.0370134
0.00257446	0.197011	0.0371975	0.0341043	0.0451753	0.0682561	0.0428274	0.0682707	0.0113354	0.00780572	0.0854843	0.0408381	0.0283101	0.0547264
0.001	0.204719	0.0371291	0.032498	0.0547794	0.0568747	-0.00647587	0.0614182	0.00431158	0.00572618	0.0786517	0.0331941	0.0305525	0.0511565
0.0084097	0.193311	0.0267883	0.0330818	0.0479209	0.051696	0.0364106	0.0645868	0.00777047	-0.0113514	0.0213058	0.0321311	0.033913	0.054923
0.0291498	0.250716	0.028032	0.0344019	0.0500469	0.0509508	0.0771704	0.0689272	0.0128829	-0.00711549	0.0464411	0.0395204	0.0285714	0.0467137
0.001	0.258904	0.0268963	0.0282767	0.0574119	0.0482974	0.0710123	0.0757282	0.0202106	0.0180505	0.0539846	0.0355973	0.0270793	0.0529758
0.00556269	0.232759	0.0274424	0.0281052	0.0570328	0.0489339	0.105238	0.0841542	0.0252567	0.0212297	0.0725287	0.0511828	0.0436708	0.0501124
0.001	0.191257	0.0324396	0.0347148	0.0451916	0.0383275	0.0409896	0.0829466	0.0337405	0.0352397	0.0437468	0.0399832	0.0299122	0.0487805
0.0030159	0.229611	0.0394134	0.0312147	0.0528246	0.0292634	0.0191354	0.0695345	0.0237553	0.00280811	0.0208193	0.0210161	0.0493288	0.0582336
0.024049	0.0717422	0.0402245	0.0256216	0.0615559	0.0348973	0.0463167	0.0625738	0.0236967	-0.0129416	0.0139222	0.0284341	0.0467649	0.0476821
0.00334124	0.0751105	0.0349892	0.0243542	0.070622	0.0329167	0.0105946	0.0551228	0.0256024	0.00253879	0.0174889	0.0318627	0.0271799	0.0632955
0.000500722	0.151993	0.0490972	0.0217773	0.064836	0.0357902	0.0165871	0.0392405	0.0231214	0.00852273	0.0296883	0.0236908	0.0477855	0.0615436
0.00495047	0.282386	0.169554	0.0202566	0.0717575	0.0394098	0.00854345	0.0377917	0.00382875	0.0176471	0.0277066	0.0330808	0.0485853	0.0443981
0.001	0.236436	0.149926	0.0206078	0.0522265	0.0403912	0.0298851	0.0272021	-0.0130615	0.000801496	0.0011439	0.0395708	0.0553644	0.0562282
0.001	0.240956	0.139684	0.0427181	0.0536819	0.0487849	0.025508	0.0360284	-0.0053009	-0.0168539	0.0030896	0.0505324	0.0437376	0.0608963
0.0954036	0.301288	0.187566	0.0650633	0.0617813	0.0559708	0.062975	0.0417391	-0.00215186	-0.00881727	-0.0060274	0.0603531	0.0443651	0.0563934
0.145609	0.312961	0.123354	0.0447703	0.0626511	0.0416368	0.071599	0.023297	-0.00965018	-0.00694637	0.00107527	0.0593448	0.0615496	0.0516462
0.230517	0.308823	0.0670068	0.0220527	0.0589141	0.0389888	0.0635271	0.00244349	-0.00498132	0.000492368	0.016331	0.0905761	0.0582722	0.057725
0.265455	0.245833	0.0676056	0.0192182	0.0543205	0.0423896	0.049707	0.00492041	-0.00948883	0.00697283	0.0151278	0.0583375	0.0958014	0.0564192
0.21394	0.282412	0.0574628	0.0314331	0.0560213	0.043211	0.0540541	0.0136604	0.00149835	0.0153846	0.0167207	0.0633549	0.111598	0.0714155
0.0724638	0.311091	0.0451033	0.0155967	0.047619	0.0457919	0.0538603	0.0170725	0.0258852	0.0267003	0.020429	0.0756241	0.0949525	0.061426
0.001	0.332811	0.0474098	0.0111682	0.0400154	0.0392085	0.0748241	0.0184421	0.0456456	0.0176456	0.0117647	0.0769542	0.0618052	0.0673966
0.00948567	0.310801	0.0340696	0.0168171	0.0446683	0.0453548	0.0457298	0.0268456	0.0524261	0.0101055	0.0237063	0.0884793	0.0525131	0.0819859
0.0420168	0.319672	0.0281155	0.0292028	0.0499133	0.0415763	0.0669856	0.0422216	0.0220096	0.0230074	0.0277054	0.0840982	0.0700848	0.0739272
0.0336862	0.238504	0.0440627	0.0154877	0.057554	0.0372626	0.0670365	0.051168	0.0389178	0.0126681	0.00266796	0.0958698	0.0694912	0.0683183
0.0352941	0.237991	0.0472637	0.0305085	0.0513061	0.0371292	0.0636462	0.054515	-0.00139958	0.0161776	0.0138853	0.0552175	0.0505335	0.0624327
0.0326549	0.277744	0.0404302	0.0219161	0.0492765	0.0350909	0.0365269	0.0735256	0.025867	0.0276243	0.034315	0.0617431	0.0894074	0.0330697
0.00834876	0.269883	0.0309109	0.0273045	0.052549	0.0365378	0.0605739	0.0759105	0.0121816	0.0423437	0.00610241	0.0441928	0.0539089	0.0536999
0.0329013	0.262108	0.0385376	0.0406368	0.0509242	0.0364244	-0.0088426	0.0576382	0.0194805	0.0348712	0.00369979	0.0621385	0.0298069	0.0551808
0.0897622	0.277174	0.0413105	0.0328618	0.05676	0.033357	-0.00574317	0.0562552	0.042292	0.0957974	-0.00292475	0.043299	0.0131827	0.0426126
0.0597969	0.354037	0.0479552	0.02103	0.0557722	0.037777	-0.016129	0.0375072	0.0362027	-0.0143409	0.00266099	0.0445935	0.0199297	0.0556824
0.00790749	0.391031	0.0397764	0.0175739	0.0632059	0.0438596	-0.025	0.0360542	0.0460251	-0.0350489	0.0236686	0.0885324	0.0220713	0.0578871
0.001	0.272841	0.013517	0.0166556	0.0535786	0.0407614	0.00699301	0.0525718	0.0188141	-0.0182421	0.0216635	0.0164445	0.0405229	0.0487493
0.001	0.368786	0.0245055	0.0156003	0.0519685	0.04235	0.0164418	0.034256	0.00811054	-0.0254669	-0.00230947	0.0709888	0.0475825	0.0320761
0.001	0.507926	0.0226537	0.0110865	0.0578918	0.0391598	0.0268852	0.0268949	0.0427143	-0.0236111	0.0250491	0.0220913	0.0241527	0.0532838
0.00169773	0.399471	0.012987	0.0277157	0.0511164	0.0375536	0.0317913	0.0469835	0.0254523	0.0164153	0.0220499	0.0125163	0.0368782	0.0920437
0.0541555	0.297778	0.00503704	0.0205509	0.0511002	0.0385504	0.0314693	0.0562347	0.0346784	0.0138165	0.0193275	0.0289515	0.0346109	0.042362
0.0677686	0.225901	0.0187809	0.0401176	0.053209	0.0390021	0.0418926	0.0307006	0.0365239	0.0116618	0.0265439	0.0274372	0.0314725	0.0541074
0.0482247	0.102564	0.00738837	0.0299672	0.0547798	0.0420228	0.0493206	0.0322434	0.0429836	-0.00346192	0.0494461	0.0419207	0.0205707	0.058913
0.0426894	0.150738	0.00973033	0.0314043	0.0422336	0.0501746	0.0472241	0.0423729	0.034505	0.00513573	0.046252	0.0292606	0.0245614	0.0657895
0.0438719	0.100125	0.0125096	0.0302671	0.0559006	0.0745872	0.0354551	0.114074	0.0299546	-0.00521822	0.043576	0.0173857	0.0336116	0.0481647
0.001	0.0457369	0.0220994	0.0323734	0.0572702	0.0827264	0.0335623	0.111963	0.0230863	0.0140982	0.0192936	0.0113191	0.0696035	0.0639415
0.001	0.0347349	0.00365327	0.0385757	0.0491222	0.0793947	0.0465439	0.0111769	0.0436386	0.00267055	0.0235183	0.0239276	0.0717557	0.0565665
0.001	0.0582072	-0.00394477	0.0318772	0.0547945	0.103264	0.0666667	0.0492162	0.0397068	0.00989632	0.00789177	0.0372188	0.0714439	0.0579517
0.001	0.0580329	0.0478808	0.0373704	0.053516	0.0986767	0.0434279	0.0392085	0.0381632	0.0202333	0.032	0.0489098	0.0578334	0.0564531
0.001	0.0558312	0.0389723	0.0214724	0.0560265	0.0777656	0.0374685	0.0488998	0.0431678	0.0120656	0.0171821	0.0679731	0.0333883	0.0572107
0.001	0.110818	0.0393816	0.0312925	0.0483217	0.0865575	0.0413754	0.0623669	0.0570087	0.021348	0.0382632	0.0766481	0.0408381	0.0593623
0.001	0.161644	0.026433	0.0267442	0.0528084	0.0970232	0.0549922	0.0728391	0.06351	0.0171788	0.0179641	0.0463949	0.0331941	0.0613288
0.0140772	0.158611	0.0391414	0.0436664	0.0507099	0.0892001	0.0463551	0.047051	0.0646204	0.00976423	0.0271871	0.0407621	0.0321311	0.0484728
0.0179027	0.0898551	0.0256237	0.0355975	0.0457662	0.0759731	0.0610998	0.0699126	0.0549867	0.0234814	0.0420561	0.0329171	0.0395204	0.0456037
0.0196331	0.162761	0.0396167	0.0321966	0.0506375	0.0659235	0.0532126	0.0584377	0.00427873	0.00819904	0.0875555	0.0401292	0.0355973	0.063723
0.00963254	0.236514	0.0487673	0.0334358	0.045152	0.0511107	0.0113661	0.0387115	0.00292227	0.0123978	0.0854392	0.0286738	0.0511828	0.0545267
0.00208769	0.220028	0.0485857	0.041194	0.0566661	0.0452208	-0.00439754	0.0514254	0.00303616	0.00344488	0.0592662	0.0364246	0.0399832	0.0613052
0.0462091	0.192357	0.0461538	0.0323095	0.0610558	0.0426056	0.0180245	0.0638298	0.0153005	-0.00290161	0.0333021	0.0375028	0.0210161	0.0551678
0.00503355	0.235969	0.0392824	0.0274361	0.063296	0.0411145	0.0447617	0.0736544	0.0273165	-0.00181378	0.0724782	0.0354852	0.0284341	0.0523398
0.0220339	0.247184	0.0374598	0.0337323	0.0575775	0.0388233	0.0976918	0.0797267	0.0352941	0.0011236	0.0636724	0.0526531	0.0318627	0.0583907
0.018447	0.160734	0.0237033	0.0283568	0.0606352	0.0270362	0.113002	0.0746791	0.0269388	-0.00411281	0.101485	0.0663681	0.0236908	0.0600982
0.0141935	0.107438	0.031849	0.0400157	0.0523245	0.0267812	0.0502431	0.0725571	0.0203709	-0.00614215	0.0588898	0.0542696	0.0330808	0.0635565
0.0181311	0.106433	0.0405904	0.0258359	0.0537757	0.0271531	0.0383598	0.0713023	0.025227	-0.00335946	0.0402569	0.0609732	0.0395708	0.0627684
0.00890514	0.179196	0.0434402	0.0293363	0.0478924	0.033779	0.0646182	0.059563	0.0247875	-0.0107925	-0.00634357	0.0624465	0.0505324	0.0682064
0.001	0.200182	0.0282776	0.0268966	0.0544872	0.0275164	0.0428606	0.0556235	0.0183824	0.00415369	0.0183131	0.0483775	0.0603531	0.0886076
0.001	0.236476	0.071005	0.0175207	0.0545707	0.0348775	0.0571355	0.0507726	0.00865351	0.0244013	0.0389105	0.0380056	0.0593448	0.0847709
0.0873629	0.25235	0.196342	0.0325274	0.070514	0.0349849	0.0407482	0.0277335	-0.00793903	0.0131176	0.022716	0.0925162	0.0905761	0.120985
0.150449	0.206219	0.313076	0.0453109	0.0491924	0.035403	0.0585387	0.025821	-0.00424242	0.0174552	-0.00508429	0.0709382	0.0583375	0.0962099
0.0830946	0.295823	0.388178	0.0678692	0.058913	0.0478434	0.0547148	0.0382728	-0.0066305	0.00486618	0.000829417	0.0865968	0.0633549	0.0934183
0.226492	0.268421	0.448851	0.0463844	0.0324026	0.0544131	0.0520068	0.0444145	-0.0012012	0.00646249	0.00735895	0.102765	0.0756241	0.0708252
0.303371	0.303605	0.394993	0.0234401	0.0461939	0.0610897	0.0233114	0.0340539	-0.00658288	-0.00471045	0.00664364	0.0759381	0.0769542	0.0771009
0.254219	0.270588	0.284939	0.0172956	0.0499297	0.0618462	0.0668524	0.0229008	0.000907167	0.0022327	0.0112237	0.0484225	0.0884793	0.0508475
0.190683	0.294599	0.18702	0.0200704	0.0616967	0.0507983	0.0683544	0.0311598	0.00587689	-0.00390816	0.0132502	0.0567267	0.0840982	0.0582223
0.0737197	0.325039	0.0938206	0.0245886	0.058203	0.0438849	0.0693069	0.0321646	0.00713178	0.0122803	0.0217942	0.078612	0.0958698	0.0440616
0.00770918	0.262554	0.0551181	0.0348771	0.0568575	0.041435	0.0593472	0.0216755	0.0227061	0.0242439	0.0141279	0.0577274	0.0552175	0.042887
0.0165745	0.284391	0.0637565	0.00742619	0.0684301	0.0431499	0.054918	0.00705882	0.0325229	0.0238443	0.011022	0.0642165	0.0617431	0.0506657
0.0404449	0.128492	0.0498678	0.0160494	0.0590528	0.0499002	0.0544286	0.0159858	0.0328228	0.00930534	0.0153374	0.0587259	0.0441928	0.0439189
0.0150805	0.0950721	0.0379165	0.0133217	0.049779	0.0412352	0.0722175	0.0236032	0.0246397	0.0191452	0.0120541	0.055671	0.0621385	0.0444215
0.0153389	0.0851582	0.044323	0.0399487	0.0392453	0.0374235	0.0595184	0.0326797	0.0532659	0.0314319	0.0212005	0.0411405	0.043299	0.0465076
0.0204897	0.111936	0.0455319	0.0190678	0.0540641	0.0370637	0.0774831	0.0262554	0.065607	0.0110541	0.0200114	0.0603398	0.0445935	0.0300713
0.0740741	0.159605	0.0388963	0.0224252	0.0535918	0.036546	0.0557868	0.0606773	0.156355	0.0282798	0.0291036	0.0425963	0.0885324	0.0427576
0.144941	0.130288	0.0364399	0.0319767	0.0415722	0.0349823	0.0402785	0.0822917	0.120235	0.0239708	0.0117384	0.0514352	0.0164445	0.0512722
0.0881384	0.101549	0.0390105	0.0226481	0.0480381	0.0444246	0.00716561	0.0602007	0.046589	0.0689013	0.0135062	0.0551427	0.0262219	0.0488225
0.00457216	0.177559	0.0391399	0.0184102	0.0449695	0.0490719	0.00139972	0.0498599	0.0385086	0.129377	0.0150376	0.0538873	0.018631	0.0638463
0.001	0.177384	0.0442279	0.0189887	0.0529814	0.0510895	0.00621118	0.0360176	0.0426658	0.0237204	0.0162815	0.0567297	0.0220913	0.0819197
0.00839282	0.141391	0.0219124	0.0164727	0.0555003	0.0388959	-0.0150993	0.0464679	0.0570245	-0.00887489	0.0375299	0.0374119	0.0125163	0.0711399
0.000634126	0.364256	0.0374522	0.0172117	0.0666393	0.0418402	-0.0178988	0.0425788	0.0305897	-0.0281099	0.0614765	0.066074	0.0289515	0.0375325
0.0201444	0.43025	0.0287206	0.00795528	0.0627767	0.0395703	-0.0122054	0.0364334	0.0237946	-0.0585383	0.0490485	0.00206954	0.0274372	0.0541542
0.0356052	0.440229	0.0200825	0.0200045	0.0583969	0.0384892	0.0137615	0.0505915	0.0405157	0.00781632	0.0325707	0.0112585	0.0419207	0.0608886
0.0489675	0.441985	0.0220264	0.0283814	0.0591749	0.0457797	0.018837	0.0528026	0.0427662	0.00686296	0.0721649	0.0184195	0.0292606	0.046332
0.0605219	0.34079	-0.00193174	0.0311307	0.0435424	0.0408962	0.018018	0.0922731	0.0356484	0.0187979	0.0782515	0.0276423	0.0173857	0.0580951
0.067694	0.139034	0.0143286	0.0281288	0.0464103	0.0440654	0.0329562	0.0981443	0.0290303	0.00788566	0.0440433	0.0281896	0.0113191	0.0593536
0.095057	0.160125	0.0104287	0.0317868	0.0576422	0.0576109	0.0260035	0.0859298	0.0399497	-0.0152997	0.0239006	0.0266857	0.0239276	0.062983
0.0288396	0.123809	0.00789058	0.0336332	0.051124	0.0665906	0.0373152	0.0648561	0.0228482	0.00411523	0.0345821	0.0417582	0.0372188	0.0510009
0.0178897	0.0720824	0.0229885	0.0357283	0.0556715	0.0828502	0.0408116	0.0512195	0.0224396	-0.00170109	0.0438105	0.0453686	0.0489098	0.0660528
0.001	0.107905	0.0115201	0.0352209	0.0614388	0.0961048	0.0446163	0.00983437	0.0179604	-0.0159902	0.0405943	0.0684628	0.0679731	0.0572965
0.001	0.120879	0.00694215	0.0321332	0.0506847	0.107062	0.0510427	0.0385274	0.0494249	0.000241371	0.0167131	0.0665281	0.0766481	0.0567901
0.001	0.0567419	-0.000652742	0.0296799	0.0558893	0.0982922	0.0588468	0.0404753	0.038789	0.00760095	-0.000826674	0.0573199	0.0463949	0.0664279
0.001	0.130319	0.0254804	0.0208817	0.0558867	0.0830285	0.060315	0.0572114	0.050923	0.0151947	0.00353742	0.0645098	0.0407621	0.0884719
0.001	0.133333	0.0260654	0.0369791	0.0592399	0.094779	0.0417981	0.061134	0.0494852	0.0137246	-0.00671862	0.110699	0.0329171	0.0711266
0.001	0.168813	0.024619	0.0310921	0.055648	0.0918532	0.0654281	0.0758971	0.0344116	0.0175189	0.0110005	0.0528701	0.0401292	0.0568284
0.0073897	0.108772	0.0346406	0.0387443	0.0516948	0.0905505	0.0484388	0.0312605	0.0363289	0.0175523	0.00860047	0.0335644	0.0286738	0.0651978
0.0105316	0.111373	0.0312305	0.0301478	0.0431358	0.0799485	0.0565965	0.0484171	0.0458333	0.010794	0.0345197	0.0240228	0.0364246	0.0571677
0.024531	0.171011	0.0382552	0.0325363	0.0425691	0.0658271	0.0681231	0.0472255	0.0485133	0.0223214	0.021959	0.025308	0.0375028	0.0556845
0.0253583	0.179205	0.0472755	0.0351388	0.0515988	0.0531436	0.0185185	0.0405522	0.0224503	0.000539084	0.047441	0.0329306	0.0354852	0.0590584
0.0272443	0.14641	0.0490368	0.0392157	0.0510923	0.0484262	0.00243605	0.0559078	0.0112144	0.00496963	0.0368029	0.0245132	0.0526531	0.0541184
0.0747363	0.129032	0.054289	0.0292117	0.0633004	0.0387151	0.011485	0.0588235	0.0201108	-0.00803317	0.0372184	0.0400182	0.0663681	0.0505983
0.027179	0.132699	0.059648	0.0298093	0.0623347	0.0376244	0.0104912	0.0721302	0.0246361	0.00317292	0.077795	0.0404387	0.0542696	0.0490787
0.0178494	0.206612	0.0637686	0.0278955	0.075627	0.0363451	0.02903	0.0724306	0.0347126	-0.00415677	0.0830753	0.0439174	0.0609732	0.0616861
0.036465	0.128518	0.0558791	0.0257175	0.0775879	0.0285048	0.0474873	0.0703812	0.0476709	0.0281498	0.0975474	0.0742955	0.0624465	0.0629698
0.016627	0.082038	0.0429053	0.0390625	0.0726671	0.0281219	0.057222	0.0705742	0.0356308	-0.00431158	0.116619	0.131825	0.0483775	0.0741913
0.001	0.217882	0.0299957	0.0394812	0.0693224	0.0318619	0.056922	0.0657895	0.0375318	0.00549753	0.0578051	0.128877	0.0380056	0.0649947
0.001	0.274596	0.0302071	0.0346352	0.0628702	0.0389563	0.0538462	0.0633221	0.029653	0.00371379	0.0729614	0.111412	0.0925162	0.0789385
[truncated: 1,076 more rows]
